# Supplementary material for: PIPINO: A Software Package to Facilitate the Identification of Protein-Protein Interactions from Affinity Purification Mass Spectrometry Data
Source: Biomed Res Int. 2016 Feb 7;2016:2891918. doi: 10.1155/2016/2891918 (PMC4761381; doi:10.1155/2016/2891918)
Supplement: Supplementary file 1 — I. Input parameter for the application to the STAT1 interaction network. The header size of 1 and a single tabulator as field delimiter was chosen to structure the document. The amount of experiments was set to 3 with 6 samples per experiment. The accession number could be retrieved directly with the default extraction pattern “(.∗)”, while the gene name was extracted from the description field through the extraction pattern “GN=(.∗) P”. The taxonomy id was set manually to “9606” (Homo sapiens). The three experiments have been named manually and the associated sample values could be retrieved directly from appropriate fields. All adjusted parameters have been saved as a template for the ProteomeDiscoverer with three experiments and six samples and therefore can be loaded for upcoming parsing assignments. Supplementary Table: AP-MS data of all proteins being quantified in this study. Additionally, for each protein the fallowing information are provided: (Quantification frequency, enrichment compared to control, prediction of STAT1 binding, function as chaperon or protease). [file 2891918.f1.xlsx]

## Sheet: experimentalData_STAT1
Protein Information			STAT1 PPI experiments						Statistics				Inclusion criteria H/L STAT1+EPO/gfp									STAT1 PPI experiments						Statistics				Inclusion criteria M/L STAT1/gfp									STAT1 PPI experiments						Statistics
					interaction partner detection								no Biotinylation	Reproducible	STAT1-ratio	t-test	Proteolysis	potential PIP (all passed)	known and predicted	all passed				interaction partner detection								no Biotinylation	Reproducible	STAT1-ratio	t-test	Proteolysis	potential PIP (all passed)	known and predicted	all passed				interaction partner detection
					H/L STAT1+EPO/gfp					H/L STAT1+EPO/gfp				min. Replicates:	min. ratio:	max. p-value:	or	and (no bead binding),	STAT1 binders					M/L STAT1/gfp									min. Replicates:	min. ratio:	max. p-value:	or	and (no bead binding),	STAT1 binders					H/M STAT1+EpO/STAT1
														3	1	0.005	Chaperone	no chaperone, no protease	(Genecards)														3	1	0.005	Chaperone	no chaperone, no protease	(Genecards)
				ORBITRAP techResplicate1			VELOS techReplicate2						2177	963	96	397	19	15	47	8		ORBITRAP techResplicate1			VELOS techReplicate2			M/L STAT1/gfp				2177	986	202	419	0	17	47	2		ORBITRAP techResplicate1			VELOS techReplicate2			H/M STAT1+EPO/STAT1
Uniprot	Genename	Protein Description	replicate 1	replicate 2	replicate 3	replicate 1	replicate 2	replicate 3	detection frequency	mean log2 Ratio	standard deviation	p-value (t-test)	no Biotinylation	Reproducible	STAT3-ratio	p-value(T-Test)	Proteolysis or Chaperone	final PPIs				replicate 1	replicate 2	replicate 3	replicate 1	replicate 2	replicate 3	detection frequency	mean log2 Ratio	standard deviation	p-value (t-test)	no Biotinylation	Reproducible	STAT3-ratio	p-value(T-Test)	Proteolysis or Chaperone	final PPIs				replicate 1	replicate 2	replicate 3	replicate 1	replicate 2	replicate 3	detection frequency	mean	standard deviation
P35613	BSG	Basigin OS=Homo sapiens GN=BSG PE=1 SV=2 - [BASI_HUMAN]							0	n.a.	n.a.	n.a.	true	wrong	wrong	wrong	wrong	wrong	wrong	wrong							5.37284	1	2.42569	n.a.	n.a.	true	wrong	true	wrong	wrong	wrong	wrong	wrong							0.00369267	1	-8.08112	n.a.
P69849	NOMO3	Nodal modulator 3 OS=Homo sapiens GN=NOMO3 PE=2 SV=2 - [NOMO3_HUMAN]			0.0317487				1	-4.97716	n.a.	n.a.	true	wrong	wrong	wrong	wrong	wrong	wrong	wrong				3.7074				1	1.89041	n.a.	n.a.	true	wrong	true	wrong	wrong	wrong	wrong	wrong				0.00656236				1	-7.25157	n.a.
O75608	LYPLA1	Acyl-protein thioesterase 1 OS=Homo sapiens GN=LYPLA1 PE=1 SV=1 - [LYPA1_HUMAN]						0.0955879	1	-3.38703	n.a.	n.a.	true	wrong	wrong	wrong	wrong	wrong	wrong	wrong				2.86002			4.65591	2	1.86754	0.497125	0.0592213	true	wrong	true	wrong	wrong	wrong	wrong	wrong							0.00665141	1	-7.23212	n.a.
Q9UBE0	SAE1	SUMO-activating enzyme subunit 1 OS=Homo sapiens GN=SAE1 PE=1 SV=1 - [SAE1_HUMAN]			0.036013				1	-4.79534	n.a.	n.a.	true	wrong	wrong	wrong	wrong	wrong	wrong	wrong				3.72876				1	1.89869	n.a.	n.a.	true	wrong	true	wrong	wrong	wrong	wrong	wrong				0.00735711				1	-7.08665	n.a.
P61026	RAB10	Ras-related protein Rab-10 OS=Homo sapiens GN=RAB10 PE=1 SV=1 - [RAB10_HUMAN]						0.045485	1	-4.45847	n.a.	n.a.	true	wrong	wrong	wrong	wrong	wrong	wrong	wrong							3.81542	1	1.93184	n.a.	n.a.	true	wrong	true	wrong	wrong	wrong	wrong	wrong							0.00801954	1	-6.96226	n.a.
Q96CN7	ISOC1	Isochorismatase domain-containing protein 1 OS=Homo sapiens GN=ISOC1 PE=1 SV=3 - [ISOC1_HUMAN]						0.039017	1	-4.67975	n.a.	n.a.	true	wrong	wrong	wrong	wrong	wrong	wrong	wrong							3.21949	1	1.68683	n.a.	n.a.	true	wrong	true	wrong	wrong	wrong	wrong	wrong							0.00830851	1	-6.91119	n.a.
Q9NZ71	RTEL1	Regulator of telomere elongation helicase 1 OS=Homo sapiens GN=RTEL1 PE=1 SV=2 - [RTEL1_HUMAN]						0.128049	1	-2.96523	n.a.	n.a.	true	wrong	wrong	wrong	wrong	wrong	wrong	wrong							9.70011	1	3.278	n.a.	n.a.	true	wrong	true	wrong	wrong	wrong	wrong	wrong							0.00890179	1	-6.81169	n.a.
Q7Z434	MAVS	Mitochondrial antiviral-signaling protein OS=Homo sapiens GN=MAVS PE=1 SV=2 - [MAVS_HUMAN]						0.0173409	1	-5.84968	n.a.	n.a.	true	wrong	wrong	wrong	wrong	wrong	wrong	wrong							1.13116	1	0.177802	n.a.	n.a.	true	wrong	wrong	wrong	wrong	wrong	wrong	wrong							0.0104745	1	-6.57697	n.a.
O94826	TOMM70A	Mitochondrial import receptor subunit TOM70 OS=Homo sapiens GN=TOMM70A PE=1 SV=1 - [TOM70_HUMAN]			0.180157				1	-2.47267	n.a.	n.a.	true	wrong	wrong	wrong	wrong	wrong	wrong	wrong				2.19535				1	1.13445	n.a.	n.a.	true	wrong	true	wrong	wrong	wrong	wrong	wrong				0.0106597				1	-6.55168	n.a.
P30084	ECHS1	Enoyl-CoA hydratase, mitochondrial OS=Homo sapiens GN=ECHS1 PE=1 SV=4 - [ECHM_HUMAN]			0.0812028			0.0498212	2	-3.97471	0.498348	0.0281467	true	wrong	wrong	wrong	wrong	wrong	wrong	wrong				4.32993			3.89801	2	2.03854	0.107203	0.011831	true	wrong	true	wrong	wrong	wrong	wrong	wrong				0.0140305			0.00873813	2	-6.49688	0.483073
O43583	DENR	Density-regulated protein OS=Homo sapiens GN=DENR PE=1 SV=2 - [DENR_HUMAN]						0.266999	1	-1.90509	n.a.	n.a.	true	wrong	wrong	wrong	wrong	wrong	wrong	wrong				6.77693			18.693	2	3.49253	1.03506	0.0657537	true	wrong	true	wrong	wrong	wrong	wrong	wrong							0.0125305	1	-6.31841	n.a.
Q9BPW8	NIPSNAP1	Protein NipSnap homolog 1 OS=Homo sapiens GN=NIPSNAP1 PE=1 SV=1 - [NIPS1_HUMAN]						0.126008	1	-2.98841	n.a.	n.a.	true	wrong	wrong	wrong	wrong	wrong	wrong	wrong							6.51472	1	2.7037	n.a.	n.a.	true	wrong	true	wrong	wrong	wrong	wrong	wrong							0.0132568	1	-6.23712	n.a.
P09429	HMGB1	High mobility group protein B1 OS=Homo sapiens GN=HMGB1 PE=1 SV=3 - [HMGB1_HUMAN]						1.56143	1	0.642872	n.a.	n.a.	true	wrong	wrong	wrong	wrong	wrong	wrong	wrong							67.7271	1	6.08166	n.a.	n.a.	true	wrong	true	wrong	wrong	wrong	wrong	wrong							0.0155583	1	-6.00617	n.a.
Q9BTE3	MCMBP	Mini-chromosome mainten.a.ce complex-binding protein OS=Homo sapiens GN=MCMBP PE=1 SV=2 - [MCMBP_HUMAN]							0	n.a.	n.a.	n.a.	true	wrong	wrong	wrong	wrong	wrong	wrong	wrong								0	n.a.	n.a.	n.a.	true	wrong	wrong	wrong	wrong	wrong	wrong	wrong							0.018044	1	-5.79234	n.a.
P20674	COX5A	Cytochrome c oxidase subunit 5A, mitochondrial OS=Homo sapiens GN=COX5A PE=1 SV=2 - [COX5A_HUMAN]						0.20329	1	-2.29839	n.a.	n.a.	true	wrong	wrong	wrong	wrong	wrong	wrong	wrong							7.4201	1	2.89144	n.a.	n.a.	true	wrong	true	wrong	wrong	wrong	wrong	wrong							0.0184761	1	-5.75819	n.a.
P62993	GRB2	Growth factor receptor-bound protein 2 OS=Homo sapiens GN=GRB2 PE=1 SV=1 - [GRB2_HUMAN]						0.175886	1	-2.50729	n.a.	n.a.	true	wrong	wrong	wrong	wrong	wrong	wrong	wrong							3.22746	1	1.6904	n.a.	n.a.	true	wrong	true	wrong	wrong	wrong	wrong	wrong							0.0198034	1	-5.65811	n.a.
P12081	HARS	Histidine--tRNA ligase, cytoplasmic OS=Homo sapiens GN=HARS PE=1 SV=2 - [SYHC_HUMAN]						0.1028	1	-3.28209	n.a.	n.a.	true	wrong	wrong	wrong	wrong	wrong	wrong	wrong							3.52918	1	1.81933	n.a.	n.a.	true	wrong	true	wrong	wrong	wrong	wrong	wrong							0.0198034	1	-5.65811	n.a.
O76003	GLRX3	Glutaredoxin-3 OS=Homo sapiens GN=GLRX3 PE=1 SV=2 - [GLRX3_HUMAN]						0.13532	1	-2.88555	n.a.	n.a.	true	wrong	wrong	wrong	wrong	wrong	wrong	wrong							4.55616	1	2.18782	n.a.	n.a.	true	wrong	true	wrong	wrong	wrong	wrong	wrong							0.020256	1	-5.62551	n.a.
Q10713	PMPCA	Mitochondrial-processing peptidase subunit alpha OS=Homo sapiens GN=PMPCA PE=1 SV=2 - [MPPA_HUMAN]			0.00176487				1	-9.14622	n.a.	n.a.	true	wrong	wrong	wrong	wrong	wrong	wrong	wrong				0.062885				1	-3.99114	n.a.	n.a.	true	wrong	wrong	wrong	wrong	wrong	wrong	wrong				0.0204364				1	-5.61271	n.a.
O75396	SEC22B	Vesicle-trafficking protein SEC22b OS=Homo sapiens GN=SEC22B PE=1 SV=4 - [SC22B_HUMAN]			0.0447324				1	-4.48254	n.a.	n.a.	true	wrong	wrong	wrong	wrong	wrong	wrong	wrong				5.90568			5.12879	2	2.46036	0.143884	0.0131553	true	wrong	true	wrong	wrong	wrong	wrong	wrong				0.0115617			0.0369011	2	-5.59735	1.18392
P45974	USP5	Ubiquitin carboxyl-terminal hydrolase 5 OS=Homo sapiens GN=USP5 PE=1 SV=2 - [UBP5_HUMAN]		0.365253				0.223776	2	-1.80645	0.499813	0.0614986	true	wrong	wrong	wrong	wrong	wrong	wrong	wrong							1.60892	1	0.686092	n.a.	n.a.	true	wrong	wrong	wrong	wrong	wrong	wrong	wrong							0.0207137	1	-5.59327	n.a.
Q15435	PPP1R7	Protein phosphatase 1 regulatory subunit 7 OS=Homo sapiens GN=PPP1R7 PE=1 SV=1 - [PP1R7_HUMAN]						0.111226	1	-3.16843	n.a.	n.a.	true	wrong	wrong	wrong	wrong	wrong	wrong	wrong							8.44872	1	3.07873	n.a.	n.a.	true	wrong	true	wrong	wrong	wrong	wrong	wrong							0.0211766	1	-5.56139	n.a.
P51149	RAB7A	Ras-related protein Rab-7a OS=Homo sapiens GN=RAB7A PE=1 SV=1 - [RAB7A_HUMAN]						0.19816	1	-2.33526	n.a.	n.a.	true	wrong	wrong	wrong	wrong	wrong	wrong	wrong							5.43129	1	2.44129	n.a.	n.a.	true	wrong	true	wrong	wrong	wrong	wrong	wrong							0.0250636	1	-5.31826	n.a.
Q99497	PARK7	Protein DJ-1 OS=Homo sapiens GN=PARK7 PE=1 SV=2 - [PARK7_HUMAN]						0.199436	1	-2.326	n.a.	n.a.	true	wrong	wrong	wrong	wrong	wrong	wrong	wrong							5.30789	1	2.40814	n.a.	n.a.	true	wrong	true	wrong	wrong	wrong	wrong	wrong							0.0255725	1	-5.28926	n.a.
P49406	MRPL19	39S ribosomal protein L19, mitochondrial OS=Homo sapiens GN=MRPL19 PE=1 SV=2 - [RM19_HUMAN]						0.117028	1	-3.09507	n.a.	n.a.	true	wrong	wrong	wrong	wrong	wrong	wrong	wrong							3.05187	1	1.60969	n.a.	n.a.	true	wrong	true	wrong	wrong	wrong	wrong	wrong							0.0260865	1	-5.26055	n.a.
O43615	TIMM44	Mitochondrial import inner membrane translocase subunit TIM44 OS=Homo sapiens GN=TIMM44 PE=1 SV=2 - [TIM44_HUMAN]			0.1527			0.148527	2	-2.73121	0.0282637	0.00232917	true	wrong	wrong	true	wrong	wrong	wrong	wrong				3.38989			3.70605	2	1.82556	0.0909637	0.0112106	true	wrong	true	wrong	wrong	wrong	wrong	wrong				0.0318089			0.0214937	2	-5.25718	0.399881
Q8IX12	CCAR1	Cell division cycle and apoptosis regulator protein 1 OS=Homo sapiens GN=CCAR1 PE=1 SV=2 - [CCAR1_HUMAN]						0.076315	1	-3.71189	n.a.	n.a.	true	wrong	wrong	wrong	wrong	wrong	wrong	wrong							1.85805	1	0.893787	n.a.	n.a.	true	wrong	wrong	wrong	wrong	wrong	wrong	wrong							0.0281937	1	-5.14848	n.a.
P29144	TPP2	Tripeptidyl-peptidase 2 OS=Homo sapiens GN=TPP2 PE=1 SV=4 - [TPP2_HUMAN]			0.315922				1	-1.66236	n.a.	n.a.	true	wrong	wrong	wrong	wrong	wrong	wrong	wrong				0.194848				1	-2.35958	n.a.	n.a.	true	wrong	wrong	wrong	wrong	wrong	wrong	wrong				0.0283486				1	-5.14058	n.a.
Q04323	UBXN1	UBX domain-containing protein 1 OS=Homo sapiens GN=UBXN1 PE=1 SV=2 - [UBXN1_HUMAN]						0.128049	1	-2.96523	n.a.	n.a.	true	wrong	wrong	wrong	wrong	wrong	wrong	wrong							2.91645	1	1.54421	n.a.	n.a.	true	wrong	true	wrong	wrong	wrong	wrong	wrong							0.0298278	1	-5.0672	n.a.
Q13242	SRSF9	Serine/arginine-rich splicing factor 9 OS=Homo sapiens GN=SRSF9 PE=1 SV=1 - [SRSF9_HUMAN]							0	n.a.	n.a.	n.a.	true	wrong	wrong	wrong	wrong	wrong	wrong	wrong							3.83568	1	1.93948	n.a.	n.a.	true	wrong	true	wrong	wrong	wrong	wrong	wrong							0.0303827	1	-5.04061	n.a.
Q8TC12	RDH11	Retinol dehydrogenase 11 OS=Homo sapiens GN=RDH11 PE=1 SV=2 - [RDH11_HUMAN]			0.243862			0.129472	2	-2.49258	0.645893	0.0576842	true	wrong	wrong	wrong	wrong	wrong	wrong	wrong				4.17051			4.10419	2	2.04866	0.0163525	0.00179657	true	wrong	true	true	wrong	wrong	wrong	wrong				0.0449727			0.0220563	2	-4.98874	0.726807
Q9Y5L0	TNPO3	Transportin-3 OS=Homo sapiens GN=TNPO3 PE=1 SV=3 - [TNPO3_HUMAN]					0.0321459		1	-4.95922	n.a.	n.a.	true	wrong	wrong	wrong	wrong	wrong	wrong	wrong						0.923673		1	-0.114546	n.a.	n.a.	true	wrong	wrong	wrong	wrong	wrong	wrong	wrong						0.033375		1	-4.90509	n.a.
P50213	IDH3A	Isocitrate dehydrogenase [NAD] subunit alpha, mitochondrial OS=Homo sapiens GN=IDH3A PE=1 SV=1 - [IDH3A_HUMAN]	0.304105		0.216235			0.109829	3	-2.37112	0.747898	0.0157999	true	true	wrong	wrong	wrong	wrong	wrong	wrong		2.44578		4.73942			7.18833	3	2.12689	0.784347	0.0212327	true	true	true	wrong	wrong	wrong	wrong	wrong		0.122264		0.0345375			0.0104719	3	-4.82165	1.77294
Q12797	ASPH	Aspartyl/asparaginyl beta-hydroxylase OS=Homo sapiens GN=ASPH PE=1 SV=3 - [ASPH_HUMAN]			0.0831041				1	-3.58894	n.a.	n.a.	true	wrong	wrong	wrong	wrong	wrong	wrong	wrong				1.73483				1	0.794794	n.a.	n.a.	true	wrong	wrong	wrong	wrong	wrong	wrong	wrong				0.0357284				1	-4.80678	n.a.
Q14166	TTLL12	Tubulin--tyrosine ligase-like protein 12 OS=Homo sapiens GN=TTLL12 PE=1 SV=2 - [TTL12_HUMAN]						0.18439	1	-2.43917	n.a.	n.a.	true	wrong	wrong	wrong	wrong	wrong	wrong	wrong							2.66206	1	1.41254	n.a.	n.a.	true	wrong	true	wrong	wrong	wrong	wrong	wrong							0.0393203	1	-4.66858	n.a.
Q92747	ARPC1A	Actin-related protein 2/3 complex subunit 1A OS=Homo sapiens GN=ARPC1A PE=1 SV=2 - [ARC1A_HUMAN]			0.186358				1	-2.42385	n.a.	n.a.	true	wrong	wrong	wrong	wrong	wrong	wrong	wrong				3.32195				1	1.73203	n.a.	n.a.	true	wrong	true	wrong	wrong	wrong	wrong	wrong				0.0419855				1	-4.57397	n.a.
P67870	CSNK2B	Casein kinase II subunit beta OS=Homo sapiens GN=CSNK2B PE=1 SV=1 - [CSK2B_HUMAN]							0	n.a.	n.a.	n.a.	true	wrong	wrong	wrong	wrong	wrong	wrong	wrong								0	n.a.	n.a.	n.a.	true	wrong	wrong	wrong	wrong	wrong	wrong	wrong							0.0425552	1	-4.55452	n.a.
Q8NDC0	MAPK1IP1L	MAPK-interacting and spindle-stabilizing protein-like OS=Homo sapiens GN=MAPK1IP1L PE=1 SV=4 - [MISSL_HUMAN]						0.152694	1	-2.71129	n.a.	n.a.	true	wrong	wrong	wrong	wrong	wrong	wrong	wrong							2.4331	1	1.28279	n.a.	n.a.	true	wrong	true	wrong	wrong	wrong	wrong	wrong							0.0432176	1	-4.53224	n.a.
Q96EL2	MRPS24	28S ribosomal protein S24, mitochondrial OS=Homo sapiens GN=MRPS24 PE=1 SV=1 - [RT24_HUMAN]						0.213747	1	-2.22602	n.a.	n.a.	true	wrong	wrong	wrong	wrong	wrong	wrong	wrong							3.25409	1	1.70225	n.a.	n.a.	true	wrong	true	wrong	wrong	wrong	wrong	wrong							0.0452352	1	-4.46641	n.a.
O43399	TPD52L2	Tumor protein D54 OS=Homo sapiens GN=TPD52L2 PE=1 SV=2 - [TPD54_HUMAN]			0.279577				1	-1.83868	n.a.	n.a.	true	wrong	wrong	wrong	wrong	wrong	wrong	wrong				4.52491				1	2.17789	n.a.	n.a.	true	wrong	true	wrong	wrong	wrong	wrong	wrong				0.0466657				1	-4.42149	n.a.
Q9Y2Q3	GSTK1	Glutathione S-transferase kappa 1 OS=Homo sapiens GN=GSTK1 PE=1 SV=3 - [GSTK1_HUMAN]			0.27255			0.220211	2	-2.02922	0.217532	0.0240823	true	wrong	wrong	wrong	wrong	wrong	true	wrong				3.29549			3.689	2	1.80186	0.115075	0.0143648	true	wrong	true	wrong	wrong	wrong	true	wrong				0.0615931			0.0371006	2	-4.38675	0.517125
Q4G0J3	LARP7	La-related protein 7 OS=Homo sapiens GN=LARP7 PE=1 SV=1 - [LARP7_HUMAN]						0.086942	1	-3.5238	n.a.	n.a.	true	wrong	wrong	wrong	wrong	wrong	wrong	wrong							1.22261	1	0.289966	n.a.	n.a.	true	wrong	wrong	wrong	wrong	wrong	wrong	wrong							0.0479971	1	-4.38091	n.a.
Q01105	SET	Protein SET OS=Homo sapiens GN=SET PE=1 SV=3 - [SET_HUMAN]			0.122899				1	-3.02446	n.a.	n.a.	true	wrong	wrong	wrong	wrong	wrong	wrong	wrong				1.92745				1	0.946692	n.a.	n.a.	true	wrong	wrong	wrong	wrong	wrong	wrong	wrong				0.0480483				1	-4.37937	n.a.
Q9NX63	CHCHD3	Coiled-coil-helix-coiled-coil-helix domain-containing protein 3, mitochondrial OS=Homo sapiens GN=CHCHD3 PE=1 SV=1 - [CHCH3_HUMAN]		0.47743	0.451806			0.114076	3	-1.7816	1.1701	0.0593584	true	true	wrong	wrong	wrong	wrong	wrong	wrong			2.41916	2.20004			2.94777	3	1.32389	0.215336	0.00435193	true	true	true	true	wrong	true	wrong	wrong			0.111044	0.0508741			0.0210615	3	-4.34566	1.19996
P38117	ETFB	Electron transfer flavoprotein subunit beta OS=Homo sapiens GN=ETFB PE=1 SV=3 - [ETFB_HUMAN]	0.472424		0.426844			0.22638	3	-1.48442	0.575184	0.0232892	true	true	wrong	wrong	wrong	wrong	wrong	wrong		5.05305		5.97897			5.45637	3	2.455	0.121525	0.000407894	true	true	true	true	wrong	true	wrong	wrong		0.0958981		0.0537806			0.023895	3	-4.32876	1.00708
Q9Y5L4	TIMM13	Mitochondrial import inner membrane translocase subunit Tim13 OS=Homo sapiens GN=TIMM13 PE=1 SV=1 - [TIM13_HUMAN]			0.357945				1	-1.48219	n.a.	n.a.	true	wrong	wrong	wrong	wrong	wrong	wrong	wrong				5.19055				1	2.37589	n.a.	n.a.	true	wrong	true	wrong	wrong	wrong	wrong	wrong				0.0515931				1	-4.27668	n.a.
P00568	AK1	Adenylate kinase isoenzyme 1 OS=Homo sapiens GN=AK1 PE=1 SV=3 - [KAD1_HUMAN]			0.59841				1	-0.740794	n.a.	n.a.	true	wrong	wrong	wrong	wrong	wrong	wrong	wrong				6.90806			3.69985	2	2.33787	0.636973	0.0605824	true	wrong	true	wrong	wrong	wrong	wrong	wrong				0.0523172				1	-4.25657	n.a.
Q8IXI1	RHOT2	Mitochondrial Rho GTPase 2 OS=Homo sapiens GN=RHOT2 PE=1 SV=2 - [MIRO2_HUMAN]						0.121976	1	-3.03533	n.a.	n.a.	true	wrong	wrong	wrong	wrong	wrong	wrong	wrong							1.54576	1	0.628314	n.a.	n.a.	true	wrong	wrong	wrong	wrong	wrong	wrong	wrong							0.0537662	1	-4.21716	n.a.
P14550	AKR1A1	Alcohol dehydrogenase [NADP+] OS=Homo sapiens GN=AKR1A1 PE=1 SV=3 - [AK1A1_HUMAN]			0.352764				1	-1.50323	n.a.	n.a.	true	wrong	wrong	wrong	wrong	wrong	wrong	wrong				4.93075				1	2.30181	n.a.	n.a.	true	wrong	true	wrong	wrong	wrong	wrong	wrong				0.0537806				1	-4.21677	n.a.
Q9BY43	CHMP4A	Charged multivesicular body protein 4a OS=Homo sapiens GN=CHMP4A PE=1 SV=3 - [CHM4A_HUMAN]			0.340821				1	-1.55291	n.a.	n.a.	true	wrong	wrong	wrong	wrong	wrong	wrong	wrong				4.76702				1	2.25309	n.a.	n.a.	true	wrong	true	wrong	wrong	wrong	wrong	wrong				0.0537806				1	-4.21677	n.a.
Q8NBX0	SCCPDH	Saccharopine dehydrogenase-like oxidoreductase OS=Homo sapiens GN=SCCPDH PE=1 SV=1 - [SCPDL_HUMAN]			0.220296				1	-2.18249	n.a.	n.a.	true	wrong	wrong	wrong	wrong	wrong	wrong	wrong				3.06472				1	1.61576	n.a.	n.a.	true	wrong	true	wrong	wrong	wrong	wrong	wrong				0.0537806				1	-4.21677	n.a.
Q15185	PTGES3	Prostaglandin E synthase 3 OS=Homo sapiens GN=PTGES3 PE=1 SV=1 - [TEBP_HUMAN]						0.327805	1	-1.60909	n.a.	n.a.	true	wrong	wrong	wrong	wrong	wrong	wrong	wrong							4.57829	1	2.19481	n.a.	n.a.	true	wrong	true	wrong	wrong	wrong	wrong	wrong							0.0545104	1	-4.19733	n.a.
O43396	TXNL1	Thioredoxin-like protein 1 OS=Homo sapiens GN=TXNL1 PE=1 SV=3 - [TXNL1_HUMAN]			0.379048				1	-1.39955	n.a.	n.a.	true	wrong	wrong	wrong	wrong	wrong	wrong	wrong				5.17974				1	2.37288	n.a.	n.a.	true	wrong	true	wrong	wrong	wrong	wrong	wrong				0.0552641				1	-4.17751	n.a.
O95336	PGLS	6-phosphogluconolactonase OS=Homo sapiens GN=PGLS PE=1 SV=2 - [6PGL_HUMAN]						0.682098	1	-0.551949	n.a.	n.a.	true	wrong	wrong	wrong	wrong	wrong	wrong	wrong							10.1899	1	3.34906	n.a.	n.a.	true	wrong	true	wrong	wrong	wrong	wrong	wrong							0.0567735	1	-4.13864	n.a.
P30048	PRDX3	Thioredoxin-dependent peroxide reductase, mitochondrial OS=Homo sapiens GN=PRDX3 PE=1 SV=3 - [PRDX3_HUMAN]						0.252412	1	-1.98615	n.a.	n.a.	true	wrong	wrong	wrong	wrong	wrong	wrong	wrong				6.11292			4.30697	2	2.35927	0.357221	0.0339503	true	wrong	true	wrong	wrong	wrong	wrong	wrong							0.0567735	1	-4.13864	n.a.
Q16762	TST	Thiosulfate sulfurtransferase OS=Homo sapiens GN=TST PE=1 SV=4 - [THTR_HUMAN]						0.086942	1	-3.5238	n.a.	n.a.	true	wrong	wrong	wrong	wrong	wrong	wrong	wrong							1.02971	1	0.0422358	n.a.	n.a.	true	wrong	wrong	wrong	wrong	wrong	wrong	wrong							0.0575382	1	-4.11934	n.a.
P09972	ALDOC	Fructose-bisphosphate aldolase C OS=Homo sapiens GN=ALDOC PE=1 SV=2 - [ALDOC_HUMAN]		0.484985	0.293535			0.232172	3	-1.63971	0.542936	0.0173288	true	true	wrong	wrong	wrong	wrong	wrong	wrong			2.80615	5.29017			4.11283	3	1.97735	0.460582	0.00880455	true	true	true	wrong	wrong	wrong	wrong	wrong			0.15035	0.0369394			0.0343464	3	-4.11866	1.20065
Q7Z4H3	HDDC2	HD domain-containing protein 2 OS=Homo sapiens GN=HDDC2 PE=1 SV=1 - [HDDC2_HUMAN]			0.122899				1	-3.02446	n.a.	n.a.	true	wrong	wrong	wrong	wrong	wrong	wrong	wrong				1.54447				1	0.627116	n.a.	n.a.	true	wrong	wrong	wrong	wrong	wrong	wrong	wrong				0.0598358				1	-4.06285	n.a.
O75937	DNAJC8	DnaJ homolog subfamily C member 8 OS=Homo sapiens GN=DNAJC8 PE=1 SV=2 - [DNJC8_HUMAN]						0.504033	1	-0.988411	n.a.	n.a.	true	wrong	wrong	wrong	wrong	wrong	wrong	wrong							5.73535	1	2.51988	n.a.	n.a.	true	wrong	true	wrong	wrong	wrong	wrong	wrong							0.0598627	1	-4.0622	n.a.
Q92541	RTF1	RNA polymerase-associated protein RTF1 homolog OS=Homo sapiens GN=RTF1 PE=1 SV=4 - [RTF1_HUMAN]						0.147152	1	-2.76463	n.a.	n.a.	true	wrong	wrong	wrong	wrong	wrong	wrong	wrong							1.63151	1	0.706211	n.a.	n.a.	true	wrong	wrong	wrong	wrong	wrong	wrong	wrong							0.061438	1	-4.02473	n.a.
Q96QK1	VPS35	Vacuolar protein sorting-associated protein 35 OS=Homo sapiens GN=VPS35 PE=1 SV=2 - [VPS35_HUMAN]			0.453756				1	-1.14001	n.a.	n.a.	true	wrong	wrong	wrong	wrong	wrong	wrong	wrong				4.33182				1	2.11497	n.a.	n.a.	true	wrong	true	wrong	wrong	wrong	wrong	wrong				0.0703353			0.0555819	2	-3.99942	0.240158
O15173	PGRMC2	Membrane-associated progesterone receptor component 2 OS=Homo sapiens GN=PGRMC2 PE=1 SV=1 - [PGRC2_HUMAN]		0.253078	0.111716			0.20329	3	-2.48094	0.610696	0.00980267	true	true	wrong	wrong	wrong	wrong	wrong	wrong			1.56448	2.31172			2.27098	3	1.01266	0.318064	0.015673	true	true	true	wrong	wrong	wrong	wrong	wrong			0.141221	0.0324157			0.0545104	3	-3.98949	1.07674
Q8TEA8	DTD1	D-tyrosyl-tRNA(Tyr) deacylase 1 OS=Homo sapiens GN=DTD1 PE=1 SV=2 - [DTD1_HUMAN]			1.12752				1	0.173153	n.a.	n.a.	true	wrong	wrong	wrong	wrong	wrong	wrong	wrong				13.3918				1	3.74328	n.a.	n.a.	true	wrong	true	wrong	wrong	wrong	wrong	wrong				0.0629845				1	-3.98886	n.a.
P29966	MARCKS	Myristoylated alanine-rich C-kinase substrate OS=Homo sapiens GN=MARCKS PE=1 SV=4 - [MARCS_HUMAN]						4.90316	1	2.29371	n.a.	n.a.	true	wrong	true	wrong	wrong	wrong	wrong	wrong							52.7938	1	5.7223	n.a.	n.a.	true	wrong	true	wrong	wrong	wrong	wrong	wrong							0.0630337	1	-3.98773	n.a.
Q9Y371	SH3GLB1	Endophilin-B1 OS=Homo sapiens GN=SH3GLB1 PE=1 SV=1 - [SHLB1_HUMAN]			0.370182				1	-1.43369	n.a.	n.a.	true	wrong	wrong	wrong	wrong	wrong	wrong	wrong				4.40124				1	2.13791	n.a.	n.a.	true	wrong	true	wrong	wrong	wrong	wrong	wrong				0.0637843				1	-3.97065	n.a.
Q99614	TTC1	Tetratricopeptide repeat protein 1 OS=Homo sapiens GN=TTC1 PE=1 SV=1 - [TTC1_HUMAN]						0.31322	1	-1.67475	n.a.	n.a.	true	wrong	wrong	wrong	wrong	wrong	wrong	wrong							3.3617	1	1.74919	n.a.	n.a.	true	wrong	true	wrong	wrong	wrong	wrong	wrong							0.0638392	1	-3.96941	n.a.
Q9UNZ2	NSFL1C	NSFL1 cofactor p47 OS=Homo sapiens GN=NSFL1C PE=1 SV=2 - [NSF1C_HUMAN]		0.471983	0.207211			0.232678	3	-1.8192	0.642865	0.0195971	true	true	wrong	wrong	wrong	wrong	wrong	wrong			1.95084	4.75666			4.48673	3	1.79324	0.719293	0.0248346	true	true	true	wrong	wrong	wrong	wrong	wrong			0.206251	0.0363314			0.0365176	3	-3.94514	1.4442
Q9Y697	NFS1	Cysteine desulfurase, mitochondrial OS=Homo sapiens GN=NFS1 PE=1 SV=3 - [NFS1_HUMAN]			0.364912				1	-1.45438	n.a.	n.a.	true	wrong	wrong	wrong	wrong	wrong	wrong	wrong				3.53877				1	1.82325	n.a.	n.a.	true	wrong	true	wrong	wrong	wrong	wrong	wrong				0.065399				1	-3.93459	n.a.
Q9BRP4	PAAF1	Proteasomal ATPase-associated factor 1 OS=Homo sapiens GN=PAAF1 PE=1 SV=2 - [PAAF1_HUMAN]			0.371946				1	-1.42683	n.a.	n.a.	true	wrong	wrong	wrong	wrong	wrong	wrong	wrong				4.55525				1	2.18753	n.a.	n.a.	true	wrong	true	wrong	wrong	wrong	wrong	wrong				0.065399				1	-3.93459	n.a.
Q8IVS2	MCAT	Malonyl-CoA-acyl carrier protein transacylase, mitochondrial OS=Homo sapiens GN=MCAT PE=1 SV=2 - [FABD_HUMAN]		0.339144	0.154116			0.169934	3	-2.27163	0.620281	0.0119817	true	true	wrong	wrong	wrong	wrong	wrong	wrong			2.06919	1.72027			1.58265	3	0.831349	0.197907	0.00918556	true	true	wrong	wrong	wrong	wrong	wrong	wrong			0.133393	0.0523172			0.0412434	3	-3.92084	0.895256
Q99714	HSD17B10	3-hydroxyacyl-CoA dehydrogenase type-2 OS=Homo sapiens GN=HSD17B10 PE=1 SV=3 - [HCD2_HUMAN]			0.297195			0.326715	2	-1.68221	0.096608	0.012919	true	wrong	wrong	wrong	wrong	wrong	wrong	wrong				3.51724			3.25346	2	1.75821	0.0795285	0.0101775	true	wrong	true	wrong	wrong	wrong	wrong	wrong				0.0635648			0.0689704	2	-3.91675	0.0832604
O14737	PDCD5	Programmed cell death protein 5 OS=Homo sapiens GN=PDCD5 PE=1 SV=3 - [PDCD5_HUMAN]						0.470074	1	-1.08904	n.a.	n.a.	true	wrong	wrong	wrong	wrong	wrong	wrong	wrong							4.74435	1	2.24621	n.a.	n.a.	true	wrong	true	wrong	wrong	wrong	wrong	wrong							0.0679436	1	-3.87952	n.a.
P36957	DLST	Dihydrolipoyllysine-residue succinyltransferase component of 2-oxoglutarate dehydrogenase complex, mitochondrial OS=Homo sapiens GN=DLST PE=1 SV=4 - [ODO2_HUMAN]						0.20329	1	-2.29839	n.a.	n.a.	true	wrong	wrong	wrong	wrong	wrong	wrong	wrong							2.03128	1	1.02239	n.a.	n.a.	true	wrong	true	wrong	wrong	wrong	wrong	wrong							0.0687798	1	-3.86187	n.a.
O75489	NDUFS3	NADH dehydrogenase [ubiquinone] iron-sulfur protein 3, mitochondrial OS=Homo sapiens GN=NDUFS3 PE=1 SV=1 - [NDUS3_HUMAN]		0.406848	0.128109			0.213747	3	-2.16267	0.835361	0.023153	true	true	wrong	wrong	wrong	wrong	wrong	wrong			2.58269	2.52071			2.26602	3	1.29429	0.100381	0.000999501	true	true	true	true	wrong	true	wrong	wrong			0.150692	0.0372346			0.0630337	3	-3.82175	1.01864
Q9Y263	PLAA	Phospholipase A-2-activating protein OS=Homo sapiens GN=PLAA PE=1 SV=2 - [PLAP_HUMAN]			0.0881909				1	-3.50323	n.a.	n.a.	true	wrong	wrong	wrong	wrong	wrong	wrong	wrong				0.872827				1	-0.196232	n.a.	n.a.	true	wrong	wrong	wrong	wrong	wrong	wrong	wrong				0.0755113				1	-3.72716	n.a.
Q6FI81	CIAPIN1	Anamorsin OS=Homo sapiens GN=CIAPIN1 PE=1 SV=2 - [CPIN1_HUMAN]			0.393682			0.306133	2	-1.52633	0.25659	0.0376611	true	wrong	wrong	wrong	wrong	wrong	wrong	wrong				3.48243			3.06479	2	1.70794	0.130324	0.017158	true	wrong	true	wrong	wrong	wrong	wrong	wrong				0.0851669			0.0685241	2	-3.7104	0.221806
Q12792	TWF1	Twinfilin-1 OS=Homo sapiens GN=TWF1 PE=1 SV=3 - [TWF1_HUMAN]			0.7305	0.876611		0.380766	3	-0.678687	0.632462	0.102089	true	true	wrong	wrong	wrong	wrong	wrong	wrong				3.75714			3.71311	2	1.90113	0.012028	0.00142401	true	wrong	true	true	wrong	wrong	wrong	wrong				0.114192			0.0546037	2	-3.66266	0.752634
Q6PI48	DARS2	Aspartate--tRNA ligase, mitochondrial OS=Homo sapiens GN=DARS2 PE=1 SV=1 - [SYDM_HUMAN]						0.427886	1	-1.2247	n.a.	n.a.	true	wrong	wrong	wrong	wrong	wrong	wrong	wrong							3.68367	1	1.88114	n.a.	n.a.	true	wrong	true	wrong	wrong	wrong	wrong	wrong							0.0792134	1	-3.65811	n.a.
Q9UKY7	CDV3	Protein CDV3 homolog OS=Homo sapiens GN=CDV3 PE=1 SV=1 - [CDV3_HUMAN]	1.0572		1.03545				2	0.0652541	0.0212062	0.0718977	true	wrong	wrong	wrong	wrong	wrong	wrong	wrong				5.59836				1	2.48501	n.a.	n.a.	true	wrong	true	wrong	wrong	wrong	wrong	wrong				0.0808399				1	-3.62879	n.a.
Q9BWD1	ACAT2	Acetyl-CoA acetyltransferase, cytosolic OS=Homo sapiens GN=ACAT2 PE=1 SV=2 - [THIC_HUMAN]			0.545829				1	-0.873479	n.a.	n.a.	true	wrong	wrong	wrong	wrong	wrong	wrong	wrong				5.02252				1	2.32841	n.a.	n.a.	true	wrong	true	wrong	wrong	wrong	wrong	wrong				0.0817457				1	-3.61271	n.a.
P13995	MTHFD2	Bifunctional methylenetetrahydrofolate dehydrogenase/cyclohydrolase, mitochondrial OS=Homo sapiens GN=MTHFD2 PE=1 SV=2 - [MTDC_HUMAN]					0.426648	0.325706	2	-1.42362	0.275401	0.0432733	true	wrong	wrong	wrong	wrong	wrong	wrong	wrong						6.00097	2.57109	2	1.97379	0.86466	0.095617	true	wrong	true	wrong	wrong	wrong	wrong	wrong						0.0738686	0.0939023	2	-3.5858	0.244799
Q9NWT8	AURKAIP1	Aurora kinase A-interacting protein OS=Homo sapiens GN=AURKAIP1 PE=1 SV=1 - [AKIP_HUMAN]							0	n.a.	n.a.	n.a.	true	wrong	wrong	wrong	wrong	wrong	wrong	wrong								0	n.a.	n.a.	n.a.	true	wrong	wrong	wrong	wrong	wrong	wrong	wrong						0.0843848		1	-3.56687	n.a.
P48739	PITPNB	Phosphatidylinositol transfer protein beta isoform OS=Homo sapiens GN=PITPNB PE=1 SV=2 - [PIPNB_HUMAN]			0.832044	0.864216			2	-0.237902	0.0387019	0.0364556	true	wrong	wrong	wrong	wrong	wrong	wrong	wrong				2.80828	1.39883			2	0.986952	0.710976	0.149964	true	wrong	wrong	wrong	wrong	wrong	wrong	wrong				0.0720598	0.183363		0.0458106	3	-3.56335	1.02033
Q96GM8	TOE1	Target of EGR1 protein 1 OS=Homo sapiens GN=TOE1 PE=1 SV=1 - [TOE1_HUMAN]						0.364855	1	-1.45461	n.a.	n.a.	true	wrong	wrong	wrong	wrong	wrong	wrong	wrong							2.93669	1	1.55419	n.a.	n.a.	true	wrong	true	wrong	wrong	wrong	wrong	wrong							0.0847064	1	-3.56139	n.a.
Q7L8L6	FASTKD5	FAST kinase domain-containing protein 5 OS=Homo sapiens GN=FASTKD5 PE=1 SV=1 - [FAKD5_HUMAN]					0.052627		1	-4.24805	n.a.	n.a.	true	wrong	wrong	wrong	wrong	wrong	wrong	wrong						0.589523		1	-0.762379	n.a.	n.a.	true	wrong	wrong	wrong	wrong	wrong	wrong	wrong						0.0853437		1	-3.55057	n.a.
O95861	BPNT1	3'(2'),5'-bisphosphate nucleotidase 1 OS=Homo sapiens GN=BPNT1 PE=1 SV=1 - [BPNT1_HUMAN]			0.475052			0.60617	2	-0.898024	0.248646	0.0615418	true	wrong	wrong	wrong	wrong	wrong	wrong	wrong				4.114				1	2.04054	n.a.	n.a.	true	wrong	true	wrong	wrong	wrong	wrong	wrong				0.0863502				1	-3.53366	n.a.
P48735	IDH2	Isocitrate dehydrogenase [NADP], mitochondrial OS=Homo sapiens GN=IDH2 PE=1 SV=2 - [IDHP_HUMAN]			0.473482				1	-1.07862	n.a.	n.a.	true	wrong	wrong	wrong	wrong	wrong	wrong	wrong				4.11079				1	2.03942	n.a.	n.a.	true	wrong	true	wrong	wrong	wrong	wrong	wrong				0.0863502				1	-3.53366	n.a.
Q96S44	TP53RK	TP53-regulating kinase OS=Homo sapiens GN=TP53RK PE=1 SV=2 - [PRPK_HUMAN]	0.160675		0.138606			0.086352	3	-3.00745	0.46798	0.00398738	true	true	wrong	true	wrong	wrong	wrong	wrong		0.850782		0.768518	0.811837		0.868735	4	-0.279185	0.0785712	0.00286645	true	true	wrong	true	wrong	wrong	wrong	wrong		0.133844		0.0979156			0.0493703	3	-3.5313	0.735927
P61081	UBE2M	NEDD8-conjugating enzyme Ubc12 OS=Homo sapiens GN=UBE2M PE=1 SV=1 - [UBC12_HUMAN]			0.865906	1.0203		0.995316	3	-0.0618319	0.1276	0.244816	true	true	wrong	wrong	wrong	wrong	wrong	wrong				4.0692	2.95417		4.63808	3	1.93367	0.33481	0.00492297	true	true	true	true	wrong	true	wrong	wrong				0.0763868	0.131693		0.0645195	3	-3.5298	0.537961
P09936	UCHL1	Ubiquitin carboxyl-terminal hydrolase isozyme L1 OS=Homo sapiens GN=UCHL1 PE=1 SV=2 - [UCHL1_HUMAN]			0.47149		0.808268	0.437976	3	-0.860957	0.482599	0.0453547	true	true	wrong	wrong	wrong	wrong	wrong	wrong				6.3325		3.82794	4.59095	3	2.26605	0.367746	0.00433245	true	true	true	true	wrong	true	wrong	wrong				0.0535283		0.215828	0.0622333	3	-3.48059	1.10396
O43809	NUDT21	Cleavage and polyadenylation specificity factor subunit 5 OS=Homo sapiens GN=NUDT21 PE=1 SV=1 - [CPSF5_HUMAN]						0.193095	1	-2.37261	n.a.	n.a.	true	wrong	wrong	wrong	wrong	wrong	wrong	wrong							1.4516	1	0.537648	n.a.	n.a.	true	wrong	wrong	wrong	wrong	wrong	wrong	wrong							0.0913476	1	-3.45249	n.a.
Q9BV20	MRI1	Methylthioribose-1-phosphate isomerase OS=Homo sapiens GN=MRI1 PE=1 SV=1 - [MTNA_HUMAN]						0.285045	1	-1.81074	n.a.	n.a.	true	wrong	wrong	wrong	wrong	wrong	wrong	wrong							2.09502	1	1.06696	n.a.	n.a.	true	wrong	true	wrong	wrong	wrong	wrong	wrong							0.0932911	1	-3.42212	n.a.
P28066	PSMA5	Proteasome subunit alpha type-5 OS=Homo sapiens GN=PSMA5 PE=1 SV=3 - [PSA5_HUMAN]						0.295844	1	-1.75709	n.a.	n.a.	true	wrong	wrong	wrong	wrong	wrong	wrong	wrong							2.10145	1	1.07138	n.a.	n.a.	true	wrong	true	wrong	wrong	wrong	wrong	wrong							0.0962447	1	-3.37715	n.a.
Q8TF09	DYNLRB2	Dynein light chain roadblock-type 2 OS=Homo sapiens GN=DYNLRB2 PE=1 SV=1 - [DLRB2_HUMAN]						0.597424	1	-0.743172	n.a.	n.a.	true	wrong	wrong	wrong	wrong	wrong	wrong	wrong							4.21546	1	2.07569	n.a.	n.a.	true	wrong	true	wrong	wrong	wrong	wrong	wrong							0.0972395	1	-3.36231	n.a.
Q8N8S7	ENAH	Protein enabled homolog OS=Homo sapiens GN=ENAH PE=1 SV=2 - [ENAH_HUMAN]			0.453756				1	-1.14001	n.a.	n.a.	true	wrong	wrong	wrong	wrong	wrong	wrong	wrong				4.58317			6.7017	2	2.47044	0.387622	0.0351721	true	wrong	true	wrong	wrong	wrong	wrong	wrong				0.0989122				1	-3.33771	n.a.
Q9Y673	ALG5	Dolichyl-phosphate beta-glucosyltransferase OS=Homo sapiens GN=ALG5 PE=1 SV=1 - [ALG5_HUMAN]						0.1028	1	-3.28209	n.a.	n.a.	true	wrong	wrong	wrong	wrong	wrong	wrong	wrong							0.687412	1	-0.540753	n.a.	n.a.	true	wrong	wrong	wrong	wrong	wrong	wrong	wrong							0.10229	1	-3.28926	n.a.
Q9BRA2	TXNDC17	Thioredoxin domain-containing protein 17 OS=Homo sapiens GN=TXNDC17 PE=1 SV=1 - [TXD17_HUMAN]						0.211108	1	-2.24394	n.a.	n.a.	true	wrong	wrong	wrong	wrong	wrong	wrong	wrong							1.38467	1	0.469543	n.a.	n.a.	true	wrong	wrong	wrong	wrong	wrong	wrong	wrong							0.104346	1	-3.26055	n.a.
P21283	ATP6V1C1	V-type proton ATPase subunit C 1 OS=Homo sapiens GN=ATP6V1C1 PE=1 SV=4 - [VATC1_HUMAN]						0.808006	1	-0.307562	n.a.	n.a.	true	wrong	wrong	wrong	wrong	wrong	wrong	wrong							5.21966	1	2.38395	n.a.	n.a.	true	wrong	true	wrong	wrong	wrong	wrong	wrong							0.105382	1	-3.2463	n.a.
O14828	SCAMP3	Secretory carrier-associated membrane protein 3 OS=Homo sapiens GN=SCAMP3 PE=1 SV=3 - [SCAM3_HUMAN]			0.360121			0.26052	2	-1.70699	0.330282	0.0432814	true	wrong	wrong	wrong	wrong	wrong	wrong	wrong				2.34389			1.80354	2	1.03987	0.267338	0.05724	true	wrong	true	wrong	wrong	wrong	wrong	wrong				0.114542			0.0977931	2	-3.24009	0.161274
Q15334	LLGL1	Lethal(2) giant larvae protein homolog 1 OS=Homo sapiens GN=LLGL1 PE=1 SV=3 - [L2GL1_HUMAN]							0	n.a.	n.a.	n.a.	true	wrong	wrong	wrong	wrong	wrong	wrong	wrong								0	n.a.	n.a.	n.a.	true	wrong	wrong	wrong	wrong	wrong	wrong	wrong				0.107067				1	-3.22342	n.a.
Q15785	TOMM34	Mitochondrial import receptor subunit TOM34 OS=Homo sapiens GN=TOMM34 PE=1 SV=2 - [TOM34_HUMAN]		0.710312	0.621032			0.300925	3	-0.971087	0.666506	0.0638219	true	true	wrong	wrong	wrong	wrong	wrong	wrong			3.42924	4.51482			5.85665	3	2.16754	0.386142	0.00520693	true	true	true	wrong	wrong	wrong	wrong	wrong			0.233694	0.136972			0.0405171	3	-3.19689	1.29569
Q9BYD2	MRPL9	39S ribosomal protein L9, mitochondrial OS=Homo sapiens GN=MRPL9 PE=1 SV=2 - [RM09_HUMAN]			0.173774			0.132386	2	-2.72094	0.277515	0.0229166	true	wrong	wrong	wrong	wrong	wrong	wrong	wrong				1.03411			0.916653	2	-0.0385807	0.122997	0.3671	true	wrong	wrong	wrong	wrong	wrong	wrong	wrong				0.1264			0.0985092	2	-3.16376	0.254327
O75436	VPS26A	Vacuolar protein sorting-associated protein 26A OS=Homo sapiens GN=VPS26A PE=1 SV=2 - [VP26A_HUMAN]			0.66119			0.580514	2	-0.690731	0.132748	0.0429935	true	wrong	wrong	wrong	wrong	wrong	wrong	wrong				4.10888			4.70009	2	2.13572	0.137139	0.0144429	true	wrong	true	wrong	wrong	wrong	wrong	wrong				0.133162			0.110328	2	-3.04444	0.191903
P23921	RRM1	Ribonucleoside-diphosphate reductase large subunit OS=Homo sapiens GN=RRM1 PE=1 SV=1 - [RIR1_HUMAN]			0.457667				1	-1.12763	n.a.	n.a.	true	wrong	wrong	wrong	wrong	wrong	wrong	wrong				2.75448				1	1.46178	n.a.	n.a.	true	wrong	true	wrong	wrong	wrong	wrong	wrong				0.124344				1	-3.00759	n.a.
P22087	FBL	rRNA 2'-O-methyltransferase fibrillarin OS=Homo sapiens GN=FBL PE=1 SV=2 - [FBRL_HUMAN]					0.188076	0.208599	2	-2.3359	0.10565	0.0101765	true	wrong	wrong	wrong	wrong	wrong	wrong	wrong						2.14754	0.772756	2	0.365383	1.0427	0.353547	true	wrong	wrong	wrong	wrong	wrong	wrong	wrong						0.0852486	0.187181	2	-2.98484	0.802342
Q96I51	WBSCR16	Williams-Beuren syndrome chromosomal region 16 protein OS=Homo sapiens GN=WBSCR16 PE=1 SV=2 - [WBS16_HUMAN]			0.241166				1	-2.0519	n.a.	n.a.	true	wrong	wrong	wrong	wrong	wrong	wrong	wrong				1.42686				1	0.512847	n.a.	n.a.	true	wrong	wrong	wrong	wrong	wrong	wrong	wrong				0.126595				1	-2.98171	n.a.
P06753	TPM3	Tropomyosin alpha-3 chain OS=Homo sapiens GN=TPM3 PE=1 SV=1 - [TPM3_HUMAN]						0.334394	1	-1.58038	n.a.	n.a.	true	wrong	wrong	wrong	wrong	wrong	wrong	wrong							2.26757	1	1.18115	n.a.	n.a.	true	wrong	true	wrong	wrong	wrong	wrong	wrong							0.12717	1	-2.97517	n.a.
Q9H4I3	TRABD	TraB domain-containing protein OS=Homo sapiens GN=TRABD PE=2 SV=1 - [TRABD_HUMAN]			0.217585				1	-2.20035	n.a.	n.a.	true	wrong	wrong	wrong	wrong	wrong	wrong	wrong				1.15236				1	0.204591	n.a.	n.a.	true	wrong	wrong	wrong	wrong	wrong	wrong	wrong				0.141715				1	-2.81893	n.a.
O75044	SRGAP2	SLIT-ROBO Rho GTPase-activating protein 2 OS=Homo sapiens GN=SRGAP2 PE=1 SV=2 - [FNBP2_HUMAN]						1.39107	1	0.476197	n.a.	n.a.	true	wrong	wrong	wrong	wrong	wrong	wrong	wrong							6.59045	1	2.72038	n.a.	n.a.	true	wrong	true	wrong	wrong	wrong	wrong	wrong							0.143638	1	-2.79949	n.a.
P53004	BLVRA	Biliverdin reductase A OS=Homo sapiens GN=BLVRA PE=1 SV=2 - [BIEA_HUMAN]	0.677786					0.413034	2	-0.918382	0.505277	0.118099	true	wrong	wrong	wrong	wrong	wrong	wrong	wrong							0.786402	1	-0.346662	n.a.	n.a.	true	wrong	wrong	wrong	wrong	wrong	wrong	wrong							0.147298	1	-2.76319	n.a.
Q9NTU7	CBLN4	Cerebellin-4 OS=Homo sapiens GN=CBLN4 PE=1 SV=1 - [CBLN4_HUMAN]						0.686835	1	-0.541964	n.a.	n.a.	true	wrong	wrong	wrong	wrong	wrong	wrong	wrong							3.19565	1	1.67611	n.a.	n.a.	true	wrong	true	wrong	wrong	wrong	wrong	wrong							0.147298	1	-2.76319	n.a.
P26358	DNMT1	DNA (cytosine-5)-methyltransferase 1 OS=Homo sapiens GN=DNMT1 PE=1 SV=2 - [DNMT1_HUMAN]	0.566404		0.598561				2	-0.780263	0.0563321	0.0162358	true	wrong	wrong	wrong	wrong	wrong	wrong	wrong				1.85996				1	0.895269	n.a.	n.a.	true	wrong	wrong	wrong	wrong	wrong	wrong	wrong				0.147758				1	-2.75869	n.a.
Q92552	MRPS27	28S ribosomal protein S27, mitochondrial OS=Homo sapiens GN=MRPS27 PE=1 SV=3 - [RT27_HUMAN]			0.463241			0.379343	2	-1.2543	0.203831	0.0364171	true	wrong	wrong	wrong	wrong	wrong	wrong	wrong				2.38631			2.42473	2	1.2663	0.0162919	0.00289573	true	wrong	true	true	wrong	wrong	wrong	wrong				0.159359			0.138005	2	-2.75343	0.146767
P15374	UCHL3	Ubiquitin carboxyl-terminal hydrolase isozyme L3 OS=Homo sapiens GN=UCHL3 PE=1 SV=1 - [UCHL3_HUMAN]							0	n.a.	n.a.	n.a.	true	wrong	wrong	wrong	wrong	wrong	wrong	wrong				6.30041				1	2.65544	n.a.	n.a.	true	wrong	true	wrong	wrong	wrong	wrong	wrong							0.151003	1	-2.72735	n.a.
P49721	PSMB2	Proteasome subunit beta type-2 OS=Homo sapiens GN=PSMB2 PE=1 SV=1 - [PSB2_HUMAN]	0.43548	0.441522	0.438535				3	-1.18933	0.00994082	1.16432e-05	true	true	wrong	true	wrong	wrong	wrong	wrong		6.27184	3.14379	2.48068				3	1.87071	0.695251	0.0215438	true	true	true	wrong	wrong	wrong	wrong	wrong		0.0971215	0.196251	0.18968				3	-2.70389	0.57226
O14818	PSMA7	Proteasome subunit alpha type-7 OS=Homo sapiens GN=PSMA7 PE=1 SV=1 - [PSA7_HUMAN]			0.324238			0.235345	2	-1.85601	0.326878	0.0394376	true	wrong	wrong	wrong	true	wrong	wrong	wrong				1.41111			1.09698	2	0.315181	0.256892	0.166424	true	wrong	wrong	wrong	wrong	wrong	wrong	wrong				0.16481			0.143723	2	-2.69988	0.139663
P78310	CXADR	Coxsackievirus and adenovirus receptor OS=Homo sapiens GN=CXADR PE=1 SV=1 - [CXAR_HUMAN]							0	n.a.	n.a.	n.a.	true	wrong	wrong	wrong	wrong	wrong	wrong	wrong								0	n.a.	n.a.	n.a.	true	wrong	wrong	wrong	wrong	wrong	wrong	wrong							0.157281	1	-2.66858	n.a.
Q9Y5K5	UCHL5	Ubiquitin carboxyl-terminal hydrolase isozyme L5 OS=Homo sapiens GN=UCHL5 PE=1 SV=3 - [UCHL5_HUMAN]						0.474008	1	-1.07702	n.a.	n.a.	true	wrong	wrong	wrong	wrong	wrong	wrong	wrong							2.02706	1	1.01939	n.a.	n.a.	true	wrong	true	wrong	wrong	wrong	wrong	wrong							0.159828	1	-2.64541	n.a.
Q8N4S7	PAQR4	Progestin and adipoQ receptor family member 4 OS=Homo sapiens GN=PAQR4 PE=2 SV=3 - [PAQR4_HUMAN]		0.160577					1	-2.63866	n.a.	n.a.	true	wrong	wrong	wrong	wrong	wrong	wrong	wrong			0.983149					1	-0.0245176	n.a.	n.a.	true	wrong	wrong	wrong	wrong	wrong	wrong	wrong			0.160191					1	-2.64213	n.a.
Q9P2R7	SUCLA2	Succinyl-CoA ligase [ADP-forming] subunit beta, mitochondrial OS=Homo sapiens GN=SUCLA2 PE=1 SV=3 - [SUCB1_HUMAN]		0.620467	0.220405			0.238234	3	-1.64663	0.831598	0.0377571	true	true	wrong	wrong	wrong	wrong	wrong	wrong			1.49148	1.41178			2.06311	3	0.706362	0.295779	0.0268878	true	true	wrong	wrong	wrong	wrong	wrong	wrong			0.404298	0.127728			0.0840057	3	-2.61624	1.17385
Q9Y241	HIGD1A	HIG1 domain family member 1A OS=Homo sapiens GN=HIGD1A PE=1 SV=1 - [HIG1A_HUMAN]			0.213549				1	-2.22736	n.a.	n.a.	true	wrong	wrong	wrong	wrong	wrong	wrong	wrong				0.691458	0.743421			2	-0.480017	0.0739191	0.0345245	true	wrong	wrong	wrong	wrong	wrong	wrong	wrong				0.166643				1	-2.58517	n.a.
Q9NR28	DIABLO	Diablo homolog, mitochondrial OS=Homo sapiens GN=DIABLO PE=1 SV=1 - [DBLOH_HUMAN]					0.115548	0.19656	2	-2.7302	0.541982	0.0443912	true	wrong	wrong	wrong	wrong	wrong	wrong	wrong						1.03714	1.6466	2	0.386048	0.471557	0.226768	true	wrong	wrong	wrong	wrong	wrong	wrong	wrong						0.192142	0.146804	2	-2.5739	0.274554
P05423	POLR3D	DNA-directed RNA polymerase III subunit RPC4 OS=Homo sapiens GN=POLR3D PE=1 SV=2 - [RPC4_HUMAN]						0.504033	1	-0.988411	n.a.	n.a.	true	wrong	wrong	wrong	wrong	wrong	wrong	wrong							2.02075	1	1.01489	n.a.	n.a.	true	wrong	true	wrong	wrong	wrong	wrong	wrong							0.170221	1	-2.55452	n.a.
P62304	SNRPE	Small nuclear ribonucleoprotein E OS=Homo sapiens GN=SNRPE PE=1 SV=1 - [RUXE_HUMAN]						0.384124	1	-1.38036	n.a.	n.a.	true	wrong	wrong	wrong	wrong	wrong	wrong	wrong							1.52194	1	0.605913	n.a.	n.a.	true	wrong	wrong	wrong	wrong	wrong	wrong	wrong							0.17287	1	-2.53224	n.a.
Q13395	TARBP1	Probable methyltransferase TARBP1 OS=Homo sapiens GN=TARBP1 PE=1 SV=1 - [TARB1_HUMAN]			0.231309				1	-2.11211	n.a.	n.a.	true	wrong	wrong	wrong	wrong	wrong	wrong	wrong				1.00616				1	0.0088592	n.a.	n.a.	true	wrong	wrong	wrong	wrong	wrong	wrong	wrong				0.17319				1	-2.52957	n.a.
Q9UI43	FTSJ2	Putative ribosomal RNA methyltransferase 2 OS=Homo sapiens GN=FTSJ2 PE=1 SV=1 - [RRMJ2_HUMAN]			0.412315		0.38263		2	-1.33208	0.0762241	0.0128724	true	wrong	wrong	wrong	wrong	wrong	wrong	wrong				2.45087		3.6519	2.20626	3	1.43451	0.383545	0.0115048	true	true	true	wrong	wrong	wrong	wrong	wrong				0.195077		0.154172		2	-2.52764	0.240067
P07384	CAPN1	Calpain-1 catalytic subunit OS=Homo sapiens GN=CAPN1 PE=1 SV=1 - [CAN1_HUMAN]					0.247793		1	-2.01279	n.a.	n.a.	true	wrong	wrong	wrong	wrong	wrong	wrong	wrong						0.215903		1	-2.21154	n.a.	n.a.	true	wrong	wrong	wrong	wrong	wrong	wrong	wrong						0.176139		1	-2.50521	n.a.
Q96SK2	TMEM209	Transmembrane protein 209 OS=Homo sapiens GN=TMEM209 PE=1 SV=2 - [TM209_HUMAN]					0.0762742		1	-3.71266	n.a.	n.a.	true	wrong	wrong	wrong	wrong	wrong	wrong	wrong						0.408827		1	-1.29044	n.a.	n.a.	true	wrong	wrong	wrong	wrong	wrong	wrong	wrong						0.178217		1	-2.48829	n.a.
P28838	LAP3	Cytosol aminopeptidase OS=Homo sapiens GN=LAP3 PE=1 SV=3 - [AMPL_HUMAN]				1.93407	3.22816	0.22445	3	0.162274	2.04101	0.451542	true	true	wrong	wrong	wrong	wrong	wrong	wrong						4.83703	6.19628	2	2.45276	0.252635	0.0231424	true	wrong	true	wrong	wrong	wrong	wrong	wrong						0.90015	0.0356263	2	-2.48134	3.29452
P17858	PFKL	6-phosphofructokinase, liver type OS=Homo sapiens GN=PFKL PE=1 SV=6 - [K6PL_HUMAN]			0.98972	1.01126		1.71154	3	0.258849	0.447527	0.210975	true	true	wrong	wrong	wrong	wrong	wrong	wrong				3.42072	2.97831		4.27934	3	1.81539	0.263857	0.00348407	true	true	true	true	wrong	true	wrong	wrong				0.152221	0.217017		0.190589	3	-2.43711	0.258859
P25788	PSMA3	Proteasome subunit alpha type-3 OS=Homo sapiens GN=PSMA3 PE=1 SV=2 - [PSA3_HUMAN]			0.200351		0.320286	0.341048	3	-1.83797	0.41938	0.0084578	true	true	wrong	wrong	wrong	wrong	wrong	wrong				0.769647		0.676325	0.851735	3	-0.391155	0.16675	0.0277878	true	true	wrong	wrong	wrong	wrong	wrong	wrong				0.154383		0.190888	0.215065	3	-2.43392	0.242244
Q9BQA1	WDR77	Methylosome protein 50 OS=Homo sapiens GN=WDR77 PE=1 SV=1 - [MEP50_HUMAN]			0.922451				1	-0.116456	n.a.	n.a.	true	wrong	wrong	wrong	wrong	wrong	wrong	wrong				2.96496			1.6649	2	1.15172	0.588718	0.110401	true	wrong	true	wrong	wrong	wrong	wrong	wrong				0.192193				1	-2.37937	n.a.
Q96SB4	SRPK1	SRSF protein kinase 1 OS=Homo sapiens GN=SRPK1 PE=1 SV=2 - [SRPK1_HUMAN]			0.45571		0.484289	0.403851	3	-1.16266	0.133382	0.00217917	true	true	wrong	true	wrong	wrong	wrong	wrong				1.99605		1.45868	1.48026	3	0.702556	0.255346	0.0206612	true	true	wrong	wrong	wrong	wrong	wrong	wrong				0.15562		0.28821	0.168904	3	-2.34815	0.482833
Q15417	CNN3	Calponin-3 OS=Homo sapiens GN=CNN3 PE=1 SV=1 - [CNN3_HUMAN]						0.833944	1	-0.261978	n.a.	n.a.	true	wrong	wrong	wrong	wrong	wrong	wrong	wrong							2.82621	1	1.49887	n.a.	n.a.	true	wrong	true	wrong	wrong	wrong	wrong	wrong							0.201923	1	-2.30812	n.a.
Q8IXB1	DNAJC10	DnaJ homolog subfamily C member 10 OS=Homo sapiens GN=DNAJC10 PE=1 SV=2 - [DJC10_HUMAN]			1.61404				1	0.69068	n.a.	n.a.	true	wrong	wrong	wrong	wrong	wrong	wrong	wrong				3.9304			1.1374	2	1.08021	1.26497	0.220147	true	wrong	true	wrong	wrong	wrong	wrong	wrong				0.204932				1	-2.28678	n.a.
O75390	CS	Citrate synthase, mitochondrial OS=Homo sapiens GN=CS PE=1 SV=2 - [CISY_HUMAN]			0.425195	0.21901	0.0912788	0.285496	4	-2.17169	0.940775	0.00956153	true	true	wrong	wrong	wrong	wrong	wrong	wrong				2.76103	1.25018	1.68865	2.26665	4	0.930944	0.499682	0.0168321	true	true	wrong	wrong	wrong	wrong	wrong	wrong				0.199174	0.274788	0.212939	0.153109	4	-2.28259	0.34672
O14974	PPP1R12A	Protein phosphatase 1 regulatory subunit 12A OS=Homo sapiens GN=PPP1R12A PE=1 SV=1 - [MYPT1_HUMAN]						0.439195	1	-1.18707	n.a.	n.a.	true	wrong	wrong	wrong	wrong	wrong	wrong	wrong							1.44804	1	0.534103	n.a.	n.a.	true	wrong	wrong	wrong	wrong	wrong	wrong	wrong							0.207713	1	-2.26734	n.a.
Q9NVU7	SDAD1	Protein SDA1 homolog OS=Homo sapiens GN=SDAD1 PE=1 SV=3 - [SDA1_HUMAN]						0.285045	1	-1.81074	n.a.	n.a.	true	wrong	wrong	wrong	wrong	wrong	wrong	wrong							0.917372	1	-0.124421	n.a.	n.a.	true	wrong	wrong	wrong	wrong	wrong	wrong	wrong							0.212109	1	-2.23712	n.a.
P26640	VARS	Valine--tRNA ligase OS=Homo sapiens GN=VARS PE=1 SV=4 - [SYVC_HUMAN]	0.457362		0.493628			0.327907	3	-1.25191	0.313801	0.0101537	true	true	wrong	wrong	wrong	wrong	wrong	wrong		1.3151		1.45641			1.01326	3	0.318866	0.269917	0.0886825	true	true	wrong	wrong	wrong	wrong	wrong	wrong		0.271916		0.203496			0.176481	3	-2.22604	0.31781
Q9H7H0	METTL17	Methyltransferase-like protein 17, mitochondrial OS=Homo sapiens GN=METTL17 PE=1 SV=1 - [MET17_HUMAN]	0.250133	0.185974	0.288792	0.24863	0.14222	0.264227	6	-2.15997	0.384877	1.82789e-05	true	true	wrong	true	wrong	wrong	wrong	wrong		0.876357	1.03338	0.515464	0.963417	0.966893	0.394154	6	-0.4241	0.580127	0.066673	true	true	wrong	wrong	wrong	wrong	wrong	wrong		0.251847	0.140274	0.369956	0.250606	0.119854	0.323595	6	-2.15709	0.652741
P12532	CKMT1A	Creatine kinase U-type, mitochondrial OS=Homo sapiens GN=CKMT1A PE=1 SV=1 - [KCRU_HUMAN]			0.379512	1.12991			2	-0.61079	1.11298	0.289916	true	wrong	wrong	wrong	wrong	wrong	wrong	wrong				4.72909	2.25058		7.5023	3	2.1064	0.876369	0.026571	true	true	true	wrong	wrong	wrong	wrong	wrong				0.125931	0.404278			2	-2.14794	1.18986
P51398	DAP3	28S ribosomal protein S29, mitochondrial OS=Homo sapiens GN=DAP3 PE=1 SV=1 - [RT29_HUMAN]		0.363566	0.326744			0.349458	3	-1.5301	0.0778828	0.000431253	true	true	wrong	true	wrong	wrong	wrong	wrong			1.90157	1.32318			1.0783	3	0.479988	0.41447	0.091355	true	true	wrong	wrong	wrong	wrong	wrong	wrong			0.209787	0.222459			0.276799	3	-2.09149	0.210755
Q92900	UPF1	Regulator of nonsense transcripts 1 OS=Homo sapiens GN=UPF1 PE=1 SV=2 - [RENT1_HUMAN]			0.644074		0.750251	0.507356	3	-0.676062	0.284453	0.0271262	true	true	wrong	wrong	wrong	wrong	wrong	wrong				1.93708		1.9867	1.47666	3	0.835531	0.237293	0.012924	true	true	wrong	wrong	wrong	wrong	wrong	wrong				0.218079		0.309395	0.19698	3	-2.07781	0.341685
Q13144	EIF2B5	Translation initiation factor eIF-2B subunit epsilon OS=Homo sapiens GN=EIF2B5 PE=1 SV=3 - [EI2BE_HUMAN]							0	n.a.	n.a.	n.a.	true	wrong	wrong	wrong	wrong	wrong	wrong	wrong								0	n.a.	n.a.	n.a.	true	wrong	wrong	wrong	wrong	wrong	wrong	wrong							0.237888	1	-2.07164	n.a.
Q9BQ52	ELAC2	Zinc phosphodiesterase ELAC protein 2 OS=Homo sapiens GN=ELAC2 PE=1 SV=2 - [RNZ2_HUMAN]						0.435409	1	-1.19956	n.a.	n.a.	true	wrong	wrong	wrong	wrong	wrong	wrong	wrong							1.37598	1	0.46046	n.a.	n.a.	true	wrong	wrong	wrong	wrong	wrong	wrong	wrong							0.245752	1	-2.02473	n.a.
Q9BQE9	BCL7B	B-cell CLL/lymphoma 7 protein family member B OS=Homo sapiens GN=BCL7B PE=1 SV=1 - [BCL7B_HUMAN]						3.10464	1	1.63443	n.a.	n.a.	true	wrong	true	wrong	wrong	wrong	wrong	wrong							8.47454	1	3.08314	n.a.	n.a.	true	wrong	true	wrong	wrong	wrong	wrong	wrong							0.250531	1	-1.99694	n.a.
Q6ZSJ8	C1orf122	Uncharacterized protein C1orf122 OS=Homo sapiens GN=C1orf122 PE=2 SV=2 - [CA122_HUMAN]			0.278048				1	-1.8466	n.a.	n.a.	true	wrong	wrong	wrong	wrong	wrong	wrong	wrong				0.830488				1	-0.267969	n.a.	n.a.	true	wrong	wrong	wrong	wrong	wrong	wrong	wrong				0.251938				1	-1.98886	n.a.
Q9H936	SLC25A22	Mitochondrial glutamate carrier 1 OS=Homo sapiens GN=SLC25A22 PE=1 SV=1 - [GHC1_HUMAN]					0.264628	0.244919	2	-1.97379	0.0789561	0.00900127	true	wrong	wrong	wrong	wrong	wrong	wrong	wrong						1.00287	0.628117	2	-0.333381	0.477316	0.251961	true	wrong	wrong	wrong	wrong	wrong	wrong	wrong						0.291668	0.221062	2	-1.97754	0.282758
Q9BZF1	OSBPL8	Oxysterol-binding protein-related protein 8 OS=Homo sapiens GN=OSBPL8 PE=1 SV=3 - [OSBL8_HUMAN]			0.605152		0.452853	0.471984	3	-0.983568	0.226225	0.00859044	true	true	wrong	wrong	wrong	wrong	wrong	wrong				1.60402		1.64132	1.42578	3	0.636099	0.108959	0.00481961	true	true	wrong	true	wrong	wrong	wrong	wrong				0.284838		0.264399	0.225979	3	-1.95891	0.170479
O75694	NUP155	Nuclear pore complex protein Nup155 OS=Homo sapiens GN=NUP155 PE=1 SV=1 - [NU155_HUMAN]						0.759854	1	-0.396207	n.a.	n.a.	true	wrong	wrong	wrong	wrong	wrong	wrong	wrong							1.97476	1	0.981674	n.a.	n.a.	true	wrong	wrong	wrong	wrong	wrong	wrong	wrong							0.261863	1	-1.93312	n.a.
Q5JTZ9	AARS2	Alanine--tRNA ligase, mitochondrial OS=Homo sapiens GN=AARS2 PE=1 SV=1 - [SYAM_HUMAN]					0.589509	0.454887	2	-0.949418	0.264463	0.0619039	true	wrong	wrong	wrong	wrong	wrong	wrong	wrong						1.99044	1.52455	2	0.800736	0.272025	0.0750417	true	wrong	wrong	wrong	wrong	wrong	wrong	wrong						0.279678	0.250782	2	-1.91683	0.111251
Q29RF7	PDS5A	Sister chromatid cohesion protein PDS5 homolog A OS=Homo sapiens GN=PDS5A PE=1 SV=1 - [PDS5A_HUMAN]			0.343557			0.204519	2	-1.91553	0.529138	0.0614016	true	wrong	wrong	wrong	wrong	wrong	wrong	wrong				1.11189			0.490078	2	-0.437954	0.835746	0.296991	true	wrong	wrong	wrong	wrong	wrong	wrong	wrong				0.239515			0.294135	2	-1.91363	0.209561
O60502	MGEA5	Bifunctional protein NCOAT OS=Homo sapiens GN=MGEA5 PE=1 SV=2 - [NCOAT_HUMAN]			0.131263		0.154798	0.158338	3	-2.75998	0.147685	0.000476528	true	true	wrong	true	wrong	wrong	wrong	wrong				0.387595		0.394444	0.376694	3	-1.37267	0.0335291	9.94096e-05	true	true	wrong	true	wrong	wrong	wrong	wrong				0.229463		0.338313	0.2586	3	-1.87948	0.286854
Q8N7X1	RBMXL3	RNA-binding motif protein, X-linked-like-3 OS=Homo sapiens GN=RBMXL3 PE=2 SV=2 - [RMXL3_HUMAN]			0.201669				1	-2.30994	n.a.	n.a.	true	wrong	wrong	wrong	wrong	wrong	wrong	wrong				0.551772				1	-0.857856	n.a.	n.a.	true	wrong	wrong	wrong	wrong	wrong	wrong	wrong				0.274756				1	-1.86378	n.a.
A0FGR8	ESYT2	Extended synaptotagmin-2 OS=Homo sapiens GN=ESYT2 PE=1 SV=1 - [ESYT2_HUMAN]			0.319187				1	-1.64753	n.a.	n.a.	true	wrong	wrong	wrong	wrong	wrong	wrong	wrong				0.872827				1	-0.196232	n.a.	n.a.	true	wrong	wrong	wrong	wrong	wrong	wrong	wrong				0.274756				1	-1.86378	n.a.
Q8NEZ5	FBXO22	F-box only protein 22 OS=Homo sapiens GN=FBXO22 PE=1 SV=1 - [FBX22_HUMAN]	0.341081		0.489565	0.249151	0.191079	0.391866	5	-1.6653	0.536576	0.00113212	true	true	wrong	true	wrong	wrong	wrong	wrong		0.851629		0.69371	0.728449	0.772645	0.559375	5	-0.485326	0.225932	0.00431361	true	true	wrong	true	wrong	wrong	wrong	wrong		0.293		0.396058	0.247659	0.159951	0.356691	5	-1.85047	0.514649
P50402	EMD	Emerin OS=Homo sapiens GN=EMD PE=1 SV=1 - [EMD_HUMAN]			0.13115	0.403201	0.115565	0.115465	4	-2.61721	0.875454	0.00468212	true	true	wrong	true	wrong	wrong	wrong	wrong				0.799831	0.492943	0.762288	0.738142	4	-0.54309	0.321815	0.0216226	true	true	wrong	wrong	wrong	wrong	wrong	wrong				0.178614	0.977039	0.210706	0.173215	4	-1.82366	1.19987
Q9Y6C9	MTCH2	Mitochondrial carrier homolog 2 OS=Homo sapiens GN=MTCH2 PE=1 SV=1 - [MTCH2_HUMAN]					0.574698	0.381872	2	-1.09398	0.416992	0.0838018	true	wrong	wrong	wrong	wrong	wrong	wrong	wrong						2.17264	1.39326	2	0.798955	0.453249	0.121432	true	wrong	wrong	wrong	wrong	wrong	wrong	wrong						0.330215	0.244422	2	-1.81554	0.306905
Q93084	ATP2A3	Sarcoplasmic/endoplasmic reticulum calcium ATPase 3 OS=Homo sapiens GN=ATP2A3 PE=1 SV=2 - [AT2A3_HUMAN]			0.314296				1	-1.66981	n.a.	n.a.	true	wrong	wrong	wrong	wrong	wrong	wrong	wrong				0.826168				1	-0.275493	n.a.	n.a.	true	wrong	wrong	wrong	wrong	wrong	wrong	wrong				0.286536				1	-1.80321	n.a.
P10599	TXN	Thioredoxin OS=Homo sapiens GN=TXN PE=1 SV=3 - [THIO_HUMAN]				0.759263		0.454964	2	-0.766752	0.522443	0.142916	true	wrong	wrong	wrong	wrong	wrong	wrong	wrong					2.62195		1.41342	2	0.944914	0.630354	0.140299	true	wrong	wrong	wrong	wrong	wrong	wrong	wrong					0.315501		0.262451	2	-1.79708	0.187805
Q9H0B6	KLC2	Kinesin light chain 2 OS=Homo sapiens GN=KLC2 PE=1 SV=1 - [KLC2_HUMAN]			0.189959		0.04029		2	-3.51484	1.58194	0.0980761	true	wrong	wrong	wrong	wrong	wrong	wrong	wrong				0.719147				1	-0.47564	n.a.	n.a.	true	wrong	wrong	wrong	wrong	wrong	wrong	wrong				0.293379				1	-1.76916	n.a.
Q53H96	PYCRL	Pyrroline-5-carboxylate reductase 3 OS=Homo sapiens GN=PYCRL PE=1 SV=2 - [P5CR3_HUMAN]			0.296918			0.069134	2	-2.80316	1.48676	0.114211	true	wrong	wrong	wrong	wrong	wrong	wrong	wrong				1.23712			0.213663	2	-0.959802	1.79151	0.293611	true	wrong	wrong	wrong	wrong	wrong	wrong	wrong				0.230253			0.382455	2	-1.75267	0.517652
P78406	RAE1	mRNA export factor OS=Homo sapiens GN=RAE1 PE=1 SV=1 - [RAE1L_HUMAN]	0.351596		0.400755			0.171006	3	-1.7917	0.661644	0.0212873	true	true	wrong	wrong	wrong	wrong	wrong	wrong		1.05818		0.593621			0.509402	3	-0.547974	0.556276	0.115045	true	true	wrong	wrong	wrong	wrong	wrong	wrong		0.29553		0.42619			0.208104	3	-1.75123	0.517136
Q7Z7H8	MRPL10	39S ribosomal protein L10, mitochondrial OS=Homo sapiens GN=MRPL10 PE=1 SV=3 - [RM10_HUMAN]					0.421546	0.4416	2	-1.21271	0.0474124	0.00879748	true	wrong	wrong	wrong	wrong	wrong	wrong	wrong						1.80842	1.79963	2	0.851216	0.00497028	0.00131424	true	wrong	wrong	true	wrong	wrong	wrong	wrong						0.343596	0.258089	2	-1.74764	0.291924
Q6NS38	ALKBH2	Alpha-ketoglutarate-dependent dioxygenase alkB homolog 2 OS=Homo sapiens GN=ALKBH2 PE=1 SV=1 - [ALKB2_HUMAN]	0.360008	0.454806		0.185953	0.57414	2.20132	5	-0.939945	1.31091	0.0920661	true	true	wrong	wrong	wrong	wrong	wrong	wrong		1.04383	1.45121		0.816067	2.44815	2.70077	5	0.606192	0.752351	0.0729774	true	true	wrong	wrong	wrong	wrong	wrong	wrong		0.354077	0.336565		0.191351	0.206521	0.512299	5	-1.73904	0.589861
Q9GZT3	SLIRP	SRA stem-loop-interacting RNA-binding protein, mitochondrial OS=Homo sapiens GN=SLIRP PE=1 SV=1 - [SLIRP_HUMAN]			0.47727	0.419512	0.523802	0.0630614	4	-1.81009	1.45727	0.044469	true	true	wrong	wrong	wrong	wrong	wrong	wrong				1.13024	0.976729	1.18057	1.18838	4	0.157781	0.131805	0.0481895	true	true	wrong	wrong	wrong	wrong	wrong	wrong				0.456496	0.564967	0.610146	0.052664	4	-1.72872	1.68818
P61163	ACTR1A	Alpha-centractin OS=Homo sapiens GN=ACTR1A PE=1 SV=1 - [ACTZ_HUMAN]			0.555293	0.257489		0.831647	3	-1.02402	0.859255	0.087522	true	true	wrong	wrong	wrong	wrong	wrong	wrong				2.40522	0.988155		1.78617	3	0.695281	0.653289	0.103296	true	true	wrong	wrong	wrong	wrong	wrong	wrong				0.222477	0.304987		0.407117	3	-1.72598	0.436035
Q96CB9	NSUN4	Putative methyltransferase NSUN4 OS=Homo sapiens GN=NSUN4 PE=1 SV=2 - [NSUN4_HUMAN]	0.348329	0.437015	0.339706	0.167528	0.232103	0.330743	6	-1.75905	0.496711	0.000168306	true	true	wrong	true	wrong	wrong	wrong	wrong		1.29237	1.90946	0.85127	1.09917	2.2095	0.757882	6	0.325176	0.618693	0.127159	true	true	wrong	wrong	wrong	wrong	wrong	wrong		0.3621	0.307233	0.401878	0.306041	0.137559	0.407332	6	-1.72485	0.585292
P38159	RBMX	RNA-binding motif protein, X chromosome OS=Homo sapiens GN=RBMX PE=1 SV=3 - [RBMX_HUMAN]		0.187888	0.201669			0.15878	3	-2.45896	0.177198	0.000863252	true	true	wrong	true	wrong	wrong	wrong	wrong			0.404717	0.565965			0.533225	3	-1.01114	0.258109	0.0105186	true	true	wrong	wrong	wrong	wrong	wrong	wrong			0.492792	0.274756			0.20591	3	-1.72155	0.64142
Q9Y679	AUP1	Ancient ubiquitous protein 1 OS=Homo sapiens GN=AUP1 PE=1 SV=1 - [AUP1_HUMAN]			0.247701			0.0669244	2	-2.95733	1.33501	0.0983522	true	wrong	wrong	wrong	wrong	wrong	wrong	wrong				0.248853			0.111616	2	-2.58501	0.817948	0.0700655	true	wrong	wrong	wrong	wrong	wrong	wrong	wrong				0.329657			0.283478	2	-1.70983	0.153959
Q7L2H7	EIF3M	Eukaryotic translation initiation factor 3 subunit M OS=Homo sapiens GN=EIF3M PE=1 SV=1 - [EIF3M_HUMAN]		0.640162	0.780865			0.677368	3	-0.520778	0.147695	0.0128891	true	true	wrong	wrong	wrong	wrong	wrong	wrong			1.56812	1.92086			1.75768	3	0.801489	0.146738	0.00549455	true	true	wrong	wrong	wrong	wrong	wrong	wrong			0.391103	0.29166			0.257362	3	-1.69672	0.309902
P36507	MAP2K2	Dual specificity mitogen-activated protein kinase kinase 2 OS=Homo sapiens GN=MAP2K2 PE=1 SV=1 - [MP2K2_HUMAN]				0.906335		1.75864	2	0.336288	0.676237	0.304901	true	wrong	wrong	wrong	wrong	wrong	wrong	wrong							7.39594	1	2.88673	n.a.	n.a.	true	wrong	true	wrong	wrong	wrong	wrong	wrong					0.268131		0.358169	2	-1.69014	0.29536
Q9NR45	n.a.S	Sialic acid synthase OS=Homo sapiens GN=n.a.S PE=1 SV=2 - [SIAS_HUMAN]	0.569097					0.21581	2	-1.51271	0.989179	0.137862	true	wrong	wrong	wrong	wrong	wrong	wrong	wrong		2.38786					8.71107	2	2.18928	1.32026	0.128303	true	wrong	true	wrong	wrong	wrong	wrong	wrong		1.15908					0.0846143	2	-1.67498	2.66999
Q96E39	RBMXL1	RNA binding motif protein, X-linked-like-1 OS=Homo sapiens GN=RBMXL1 PE=1 SV=1 - [RMXL1_HUMAN]		0.215162	0.264468			0.181829	3	-2.19823	0.270717	0.00250875	true	true	wrong	true	wrong	wrong	wrong	wrong			0.488483	0.618303			0.557335	3	-0.856872	0.170403	0.00646375	true	true	wrong	wrong	wrong	wrong	wrong	wrong			0.430845	0.321556			0.222757	3	-1.67269	0.47686
O95071	UBR5	E3 ubiquitin-protein ligase UBR5 OS=Homo sapiens GN=UBR5 PE=1 SV=2 - [UBR5_HUMAN]			0.293535				1	-1.7684	n.a.	n.a.	true	wrong	wrong	wrong	wrong	wrong	wrong	wrong				0.700486				1	-0.513571	n.a.	n.a.	true	wrong	wrong	wrong	wrong	wrong	wrong	wrong				0.31439				1	-1.66937	n.a.
Q5T280	C9orf114	Uncharacterized protein C9orf114 OS=Homo sapiens GN=C9orf114 PE=1 SV=3 - [CI114_HUMAN]	0.259541	0.250848	0.371946		0.133658	0.271699	5	-2.03024	0.537913	0.000539813	true	true	wrong	true	wrong	wrong	wrong	wrong		0.637185	0.813359	0.411757	0.472983	0.59	0.364315	6	-0.92108	0.430874	0.00168209	true	true	wrong	true	wrong	wrong	wrong	wrong		0.321926	0.243795	0.547282		0.17476	0.41051	5	-1.66843	0.64054
P62857	RPS28	40S ribosomal protein S28 OS=Homo sapiens GN=RPS28 PE=1 SV=1 - [RS28_HUMAN]						0.537075	1	-0.896804	n.a.	n.a.	true	wrong	wrong	wrong	wrong	wrong	wrong	wrong							1.13273	1	0.179808	n.a.	n.a.	true	wrong	wrong	wrong	wrong	wrong	wrong	wrong							0.324096	1	-1.62551	n.a.
Q53H12	AGK	Acylglycerol kinase, mitochondrial OS=Homo sapiens GN=AGK PE=1 SV=2 - [AGK_HUMAN]						0.19816	1	-2.33526	n.a.	n.a.	true	wrong	wrong	wrong	wrong	wrong	wrong	wrong							1.06758	1	0.0943389	n.a.	n.a.	true	wrong	wrong	wrong	wrong	wrong	wrong	wrong							0.324096	1	-1.62551	n.a.
P05165	PCCA	Propionyl-CoA carboxylase alpha chain, mitochondrial OS=Homo sapiens GN=PCCA PE=1 SV=4 - [PCCA_HUMAN]	0.236341	0.191412	0.308632	0.209857	0.168543	0.295004	6	-2.12415	0.346193	1.18081e-05	true	true	wrong	true	wrong	wrong	wrong	wrong		0.834913	0.902953	0.32553	0.826735	0.923034	0.275441	6	-0.712824	0.801414	0.0406221	true	true	wrong	wrong	wrong	wrong	wrong	wrong		0.27226	0.213161	0.735017	0.221093	0.173261	0.712003	6	-1.62456	0.920239
P17066	HSPA6	Heat shock 70 kDa protein 6 OS=Homo sapiens GN=HSPA6 PE=1 SV=2 - [HSP76_HUMAN]						0.18439	1	-2.43917	n.a.	n.a.	true	wrong	wrong	wrong	wrong	wrong	wrong	wrong							0.358017	1	-1.4819	n.a.	n.a.	true	wrong	wrong	wrong	wrong	wrong	wrong	wrong							0.325919	1	-1.61741	n.a.
P10644	PRKAR1A	cAMP-dependent protein kinase type I-alpha regulatory subunit OS=Homo sapiens GN=PRKAR1A PE=1 SV=1 - [KAP0_HUMAN]						0.477958	1	-1.06504	n.a.	n.a.	true	wrong	wrong	wrong	wrong	wrong	wrong	wrong							1.00139	1	0.00199854	n.a.	n.a.	true	wrong	wrong	wrong	wrong	wrong	wrong	wrong							0.325919	1	-1.61741	n.a.
Q96GC9	VMP1	Vacuole membrane protein 1 OS=Homo sapiens GN=VMP1 PE=1 SV=1 - [VMP1_HUMAN]						0.117028	1	-3.09507	n.a.	n.a.	true	wrong	wrong	wrong	wrong	wrong	wrong	wrong							0.244826	1	-2.03017	n.a.	n.a.	true	wrong	wrong	wrong	wrong	wrong	wrong	wrong							0.325919	1	-1.61741	n.a.
Q9BW92	TARS2	Threonine--tRNA ligase, mitochondrial OS=Homo sapiens GN=TARS2 PE=1 SV=1 - [SYTM_HUMAN]			0.344722	0.329076	0.433842	0.266954	4	-1.56252	0.287445	0.000832652	true	true	wrong	true	wrong	wrong	wrong	wrong				1.4514	1.01592	1.65784	1.20017	4	0.388193	0.309714	0.043592	true	true	wrong	wrong	wrong	wrong	wrong	wrong				0.269994	0.443558	0.433983	0.217363	4	-1.61698	0.511092
Q15006	TTC35	Tetratricopeptide repeat protein 35 OS=Homo sapiens GN=TTC35 PE=1 SV=1 - [TTC35_HUMAN]		0.701492	0.664013		0.750998	0.98784	4	-0.383247	0.254326	0.0285191	true	true	wrong	wrong	wrong	wrong	wrong	wrong			1.80047	2.14324		1.87887	3.32534	4	1.14788	0.404812	0.00543028	true	true	true	wrong	wrong	wrong	wrong	wrong			0.505366	0.308234		0.505825	0.144068	4	-1.61524	0.855601
Q15120	PDK3	[Pyruvate dehydrogenase [lipoamide]] kinase isozyme 3, mitochondrial OS=Homo sapiens GN=PDK3 PE=1 SV=1 - [PDK3_HUMAN]		0.261225			0.206853	0.380583	3	-1.86789	0.443813	0.00915154	true	true	wrong	wrong	wrong	wrong	wrong	wrong			0.520183			0.520345	0.375854	3	-1.09904	0.270818	0.0098227	true	true	wrong	wrong	wrong	wrong	wrong	wrong			0.33947	0.268864		0.262188	0.476554	4	-1.61358	0.399776
P05166	PCCB	Propionyl-CoA carboxylase beta chain, mitochondrial OS=Homo sapiens GN=PCCB PE=1 SV=3 - [PCCB_HUMAN]	0.226216	0.194148	0.318778	0.195541	0.170996	0.284886	6	-2.14539	0.349683	1.18128e-05	true	true	wrong	true	wrong	wrong	wrong	wrong		0.768628	0.858086	0.286567	0.810777	0.834254	0.25698	6	-0.821307	0.824527	0.0293296	true	true	wrong	wrong	wrong	wrong	wrong	wrong		0.281999	0.217365	0.745273	0.224218	0.18352	0.723508	6	-1.58702	0.906068
Q6DCA0	AMMECR1L	AMMECR1-like protein OS=Homo sapiens GN=AMMECR1L PE=1 SV=1 - [AMERL_HUMAN]	0.260534						1	-1.94046	n.a.	n.a.	true	wrong	wrong	wrong	wrong	wrong	wrong	wrong		0.766522						1	-0.383601	n.a.	n.a.	true	wrong	wrong	wrong	wrong	wrong	wrong	wrong		0.333254						1	-1.5853	n.a.
Q8N3E9	PLCD3	1-phosphatidylinositol 4,5-bisphosphate phosphodiesterase delta-3 OS=Homo sapiens GN=PLCD3 PE=1 SV=3 - [PLCD3_HUMAN]	0.271208	0.296659	0.287183	0.248636	0.309622	0.299468	6	-1.81241	0.115542	1.12503e-07	true	true	wrong	true	wrong	wrong	wrong	wrong		0.629433	1.2101	0.494105	0.661524	1.2706	0.541982	6	-0.424028	0.588749	0.0689901	true	true	wrong	wrong	wrong	wrong	wrong	wrong		0.421611	0.240196	0.437112	0.361071	0.233084	0.376587	6	-1.57955	0.400442
Q13136	PPFIA1	Liprin-alpha-1 OS=Homo sapiens GN=PPFIA1 PE=1 SV=1 - [LIPA1_HUMAN]						0.91148	1	-0.133718	n.a.	n.a.	true	wrong	wrong	wrong	wrong	wrong	wrong	wrong							1.82793	1	0.870207	n.a.	n.a.	true	wrong	wrong	wrong	wrong	wrong	wrong	wrong							0.34069	1	-1.55347	n.a.
Q9NQS7	INCENP	Inner centromere protein OS=Homo sapiens GN=INCENP PE=1 SV=3 - [INCE_HUMAN]		0.701263			0.932591		2	-0.306328	0.290825	0.18819	true	wrong	wrong	wrong	wrong	wrong	wrong	wrong			1.79155			1.81604		2	0.851004	0.0138478	0.0036624	true	wrong	wrong	true	wrong	wrong	wrong	wrong			0.338954			0.346649		2	-1.54465	0.0229004
Q01650	SLC7A5	Large neutral amino acids transporter small subunit 1 OS=Homo sapiens GN=SLC7A5 PE=1 SV=2 - [LAT1_HUMAN]	0.282284	0.25549	0.579038			0.150816	4	-1.82771	0.798517	0.0097833	true	true	wrong	wrong	wrong	wrong	wrong	wrong		0.462185	0.484719	1.06156			0.292143	4	-0.961826	0.772412	0.0442244	true	true	wrong	wrong	wrong	wrong	wrong	wrong		0.448909	0.387704	0.307568			0.265343	4	-1.53439	0.338382
Q71U36	TUBA1A	Tubulin alpha-1A chain OS=Homo sapiens GN=TUBA1A PE=1 SV=1 - [TBA1A_HUMAN]			0.26596				1	-1.91072	n.a.	n.a.	true	wrong	wrong	wrong	wrong	wrong	wrong	wrong				0.383665				1	-1.38208	n.a.	n.a.	true	wrong	wrong	wrong	wrong	wrong	wrong	wrong				0.345401				1	-1.53366	n.a.
Q86Y79	PTRH1	Probable peptidyl-tRNA hydrolase OS=Homo sapiens GN=PTRH1 PE=1 SV=1 - [PTH_HUMAN]	0.227173	0.296172					2	-1.94681	0.270568	0.0311814	true	wrong	wrong	wrong	wrong	wrong	wrong	wrong		0.707543	1.13276				0.543887	3	-0.399296	0.536245	0.163083	true	true	wrong	wrong	wrong	wrong	wrong	wrong		0.393862	0.320487					2	-1.49295	0.210312
Q96EY4	C4orf43	UPF0534 protein C4orf43 OS=Homo sapiens GN=C4orf43 PE=1 SV=2 - [CD043_HUMAN]					0.425762	0.66082	2	-0.914776	0.448453	0.106215	true	wrong	wrong	wrong	wrong	wrong	wrong	wrong						1.20683	0.716243	2	-0.105127	0.532243	0.413296	true	wrong	wrong	wrong	wrong	wrong	wrong	wrong						0.276665	0.468816	2	-1.47335	0.538025
P35241	RDX	Radixin OS=Homo sapiens GN=RDX PE=1 SV=1 - [RADI_HUMAN]		0.685888	0.313049				2	-1.10975	0.800151	0.150079	true	wrong	wrong	wrong	wrong	wrong	wrong	wrong			1.94762	3.34242				2	1.3513	0.550963	0.0893477	true	wrong	true	wrong	wrong	wrong	wrong	wrong			0.806506	0.16447				2	-1.45717	1.622
Q9BYD3	MRPL4	39S ribosomal protein L4, mitochondrial OS=Homo sapiens GN=MRPL4 PE=1 SV=1 - [RM04_HUMAN]	0.41443		0.36483				2	-1.36275	0.130039	0.0214455	true	wrong	wrong	wrong	wrong	wrong	wrong	wrong		1.30339		1.07085				2	0.240508	0.200474	0.169529	true	wrong	wrong	wrong	wrong	wrong	wrong	wrong		0.409312		0.335717				2	-1.4317	0.2022
Q5SRE5	NUP188	Nucleoporin NUP188 homolog OS=Homo sapiens GN=NUP188 PE=1 SV=1 - [NU188_HUMAN]	0.865527						1	-0.20835	n.a.	n.a.	true	wrong	wrong	wrong	wrong	wrong	wrong	wrong		0.742722						1	-0.429107	n.a.	n.a.	true	wrong	wrong	wrong	wrong	wrong	wrong	wrong		0.37111						1	-1.43008	n.a.
Q8NF91	SYNE1	Nesprin-1 OS=Homo sapiens GN=SYNE1 PE=1 SV=3 - [SYNE1_HUMAN]			0.489565				1	-1.03043	n.a.	n.a.	true	wrong	wrong	wrong	wrong	wrong	wrong	wrong				0.985634				1	-0.0208756	n.a.	n.a.	true	wrong	wrong	wrong	wrong	wrong	wrong	wrong				0.373974				1	-1.41899	n.a.
Q9ULW3	ABT1	Activator of basal transcription 1 OS=Homo sapiens GN=ABT1 PE=1 SV=1 - [ABT1_HUMAN]				2.50513		0.810702	2	0.511065	1.15092	0.321511	true	wrong	wrong	wrong	wrong	wrong	wrong	wrong					0.256895		0.313522	2	-1.81705	0.203214	0.0251199	true	wrong	wrong	wrong	wrong	wrong	wrong	wrong							0.375121	1	-1.41457	n.a.
P11498	PC	Pyruvate carboxylase, mitochondrial OS=Homo sapiens GN=PC PE=1 SV=2 - [PYC_HUMAN]	0.265839	0.25603	0.419306	0.201531	0.228945	0.391964	6	-1.82	0.425435	6.8272e-05	wrong	true	wrong	true	wrong	wrong	wrong	wrong		0.88361	0.932223	0.341754	0.853812	0.941543	0.293901	6	-0.651708	0.784027	0.0486761	wrong	true	wrong	wrong	wrong	wrong	wrong	wrong		0.282177	0.260983	0.886467	0.219484	0.228305	0.857587	6	-1.41293	0.950391
Q6P087	RPUSD3	RNA pseudouridylate synthase domain-containing protein 3 OS=Homo sapiens GN=RPUSD3 PE=2 SV=3 - [RUSD3_HUMAN]	0.320242	0.321606	0.439091	0.299572	0.301398	0.379805	6	-1.55546	0.218696	5.70947e-06	true	true	wrong	true	wrong	wrong	wrong	wrong		0.800507	1.15979	0.5486	0.856706	1.24897	0.568321	6	-0.281824	0.497944	0.112139	true	true	wrong	wrong	wrong	wrong	wrong	wrong		0.417156	0.277049	0.644996	0.334119	0.264283	0.45794	6	-1.39566	0.487838
O14925	TIMM23	Mitochondrial import inner membrane translocase subunit Tim23 OS=Homo sapiens GN=TIMM23 PE=1 SV=1 - [TIM23_HUMAN]			0.403599			0.173007	2	-1.92005	0.864148	0.0980742	true	wrong	wrong	wrong	wrong	wrong	wrong	wrong				0.589716			0.517085	2	-0.856718	0.134081	0.0350835	true	wrong	wrong	wrong	wrong	wrong	wrong	wrong				0.535555			0.271411	2	-1.39117	0.693356
P62306	SNRPF	Small nuclear ribonucleoprotein F OS=Homo sapiens GN=SNRPF PE=1 SV=1 - [RUXF_HUMAN]						0.90058	1	-0.151073	n.a.	n.a.	true	wrong	wrong	wrong	wrong	wrong	wrong	wrong							1.60704	1	0.684409	n.a.	n.a.	true	wrong	wrong	wrong	wrong	wrong	wrong	wrong							0.382997	1	-1.38459	n.a.
P49189	ALDH9A1	4-trimethylaminobutyraldehyde dehydrogenase OS=Homo sapiens GN=ALDH9A1 PE=1 SV=3 - [AL9A1_HUMAN]				0.699805		0.491023	2	-0.770556	0.361447	0.101944	true	wrong	wrong	wrong	wrong	wrong	wrong	wrong					1.24702		2.24967	2	0.744101	0.601908	0.165382	true	wrong	wrong	wrong	wrong	wrong	wrong	wrong					0.518881		0.285053	2	-1.37861	0.611063
P31040	SDHA	Succinate dehydrogenase [ubiquinone] flavoprotein subunit, mitochondrial OS=Homo sapiens GN=SDHA PE=1 SV=2 - [DHSA_HUMAN]					0.546777		1	-0.870974	n.a.	n.a.	true	wrong	wrong	wrong	wrong	wrong	wrong	wrong						2.0063	3.77183	2	1.4599	0.643984	0.0962416	true	wrong	true	wrong	wrong	wrong	wrong	wrong						0.450525	0.328658	2	-1.37783	0.321749
Q6DKI1	RPL7L1	60S ribosomal protein L7-like 1 OS=Homo sapiens GN=RPL7L1 PE=1 SV=1 - [RL7L_HUMAN]		0.133685					1	-2.90309	n.a.	n.a.	true	wrong	wrong	wrong	wrong	wrong	wrong	wrong			0.337431					1	-1.56733	n.a.	n.a.	true	wrong	wrong	wrong	wrong	wrong	wrong	wrong			0.388937					1	-1.36239	n.a.
Q5VVJ2	MYSM1	Histone H2A deubiquitinase MYSM1 OS=Homo sapiens GN=MYSM1 PE=1 SV=1 - [MYSM1_HUMAN]							0	n.a.	n.a.	n.a.	true	wrong	wrong	wrong	wrong	wrong	wrong	wrong								0	n.a.	n.a.	n.a.	true	wrong	wrong	wrong	wrong	wrong	wrong	wrong							0.388958	1	-1.36231	n.a.
O75746	SLC25A12	Calcium-binding mitochondrial carrier protein Aralar1 OS=Homo sapiens GN=SLC25A12 PE=1 SV=2 - [CMC1_HUMAN]	0.24009	0.163521	0.256674	0.221978	0.148177	0.230309	6	-2.27955	0.323708	5.99661e-06	true	true	wrong	true	wrong	wrong	wrong	wrong		0.543961	0.549759	0.370797	0.479344	0.586905	0.322845	6	-1.1056	0.348727	0.000283213	true	true	wrong	true	wrong	wrong	wrong	wrong		0.434817	0.278438	0.573241	0.426378	0.246427	0.490916	6	-1.35432	0.476454
Q8NI36	WDR36	WD repeat-containing protein 36 OS=Homo sapiens GN=WDR36 PE=1 SV=1 - [WDR36_HUMAN]			0.123637		0.129814		2	-2.98065	0.0497323	0.00375529	true	wrong	wrong	true	wrong	wrong	wrong	wrong				0.289298		0.37501		2	-1.60219	0.264721	0.0370208	true	wrong	wrong	wrong	wrong	wrong	wrong	wrong				0.421041		0.368092		2	-1.34492	0.137104
Q9NZL9	MAT2B	Methionine adenosyltransferase 2 subunit beta OS=Homo sapiens GN=MAT2B PE=1 SV=1 - [MAT2B_HUMAN]	1.00553					0.406114	2	-0.646046	0.92489	0.251946	true	wrong	wrong	wrong	wrong	wrong	wrong	wrong		2.49918					3.64704	2	1.59409	0.385566	0.0539187	true	wrong	true	wrong	wrong	wrong	wrong	wrong		0.900497					0.174665	2	-1.33427	1.6731
O00273	DFFA	DNA fragmentation factor subunit alpha OS=Homo sapiens GN=DFFA PE=1 SV=1 - [DFFA_HUMAN]		0.588184	0.421963				2	-1.00524	0.338811	0.0744727	true	wrong	wrong	wrong	wrong	wrong	wrong	wrong			1.81205	3.61206				2	1.35522	0.703712	0.11201	true	wrong	true	wrong	wrong	wrong	wrong	wrong			0.762783	0.210379				2	-1.3198	1.314
O00139	KIF2A	Kinesin-like protein KIF2A OS=Homo sapiens GN=KIF2A PE=1 SV=3 - [KIF2A_HUMAN]	0.439189	0.449076	0.567746		0.514653	0.456042	5	-1.04997	0.157719	5.93014e-05	true	true	wrong	true	wrong	wrong	wrong	wrong		1.00757	1.34964	0.819254		1.42264	0.712687	5	0.0351494	0.436239	0.43289	true	true	wrong	wrong	wrong	wrong	wrong	wrong		0.453722	0.31727	0.561807		0.335637	0.387413	5	-1.31425	0.335734
P82650	MRPS22	28S ribosomal protein S22, mitochondrial OS=Homo sapiens GN=MRPS22 PE=1 SV=1 - [RT22_HUMAN]	0.517019	0.62138	0.685189			0.705887	4	-0.67152	0.202649	0.00349869	true	true	wrong	true	wrong	wrong	wrong	wrong		1.18496	1.18269	1.26165			2.69908	4	0.563671	0.580815	0.0737861	true	true	wrong	wrong	wrong	wrong	wrong	wrong		0.749859	0.719857	0.496665			0.0995103	4	-1.30705	1.37424
Q9HA92	RSAD1	Radical S-adenosyl methionine domain-containing protein 1, mitochondrial OS=Homo sapiens GN=RSAD1 PE=2 SV=2 - [RSAD1_HUMAN]	0.296491		0.379241				2	-1.57638	0.251112	0.0357039	true	wrong	wrong	wrong	wrong	wrong	wrong	wrong		1.4452		1.60402			5.9203	3	1.25955	1.13364	0.0970941	true	true	true	wrong	wrong	wrong	wrong	wrong		0.430569		0.380831				2	-1.30423	0.125224
Q6S8J3	POTEE	POTE ankyrin domain family member E OS=Homo sapiens GN=POTEE PE=1 SV=3 - [POTEE_HUMAN]			0.209232	0.641662	0.403357	0.293516	4	-1.49382	0.688057	0.0112732	true	true	wrong	wrong	wrong	wrong	wrong	wrong				1.47568	0.9276	1.16729	1.11922	4	0.209656	0.275253	0.112524	true	true	wrong	wrong	wrong	wrong	wrong	wrong				0.172809	1.02151	0.534317	0.288489	4	-1.29992	1.10913
P0CG38	POTEI	POTE ankyrin domain family member I OS=Homo sapiens GN=POTEI PE=3 SV=1 - [POTEI_HUMAN]			0.209232	0.641662	0.403357	0.293516	4	-1.49382	0.688057	0.0112732	true	true	wrong	wrong	wrong	wrong	wrong	wrong				1.47568	0.9276	1.16729	1.11922	4	0.209656	0.275253	0.112524	true	true	wrong	wrong	wrong	wrong	wrong	wrong				0.172809	1.02151	0.534317	0.288489	4	-1.29992	1.10913
Q4KMP7	TBC1D10B	TBC1 domain family member 10B OS=Homo sapiens GN=TBC1D10B PE=1 SV=3 - [TB10B_HUMAN]	0.123169	0.134479					2	-2.95792	0.0896184	0.00681836	true	wrong	wrong	wrong	wrong	wrong	wrong	wrong		0.276524	0.36325					2	-1.65774	0.278286	0.0376082	true	wrong	wrong	wrong	wrong	wrong	wrong	wrong		0.445585	0.370564					2	-1.29922	0.188076
Q9Y3F4	STRAP	Serine-threonine kinase receptor-associated protein OS=Homo sapiens GN=STRAP PE=1 SV=1 - [STRAP_HUMAN]		0.479145	0.762943			0.762351	3	-0.614431	0.387145	0.0553885	true	true	wrong	wrong	wrong	wrong	wrong	wrong			0.800406	1.12828			0.795611	3	-0.158979	0.288509	0.220298	true	true	wrong	wrong	wrong	wrong	wrong	wrong			0.491167	0.422052			0.334693	3	-1.2831	0.278699
Q5T440	IBA57	Putative transferase CAF17, mitochondrial OS=Homo sapiens GN=IBA57 PE=1 SV=1 - [CAF17_HUMAN]	0.426943	0.650972	0.471604	0.395543	0.546419	0.406009	6	-1.07367	0.280127	0.000115592	true	true	wrong	true	wrong	wrong	wrong	wrong		0.854511	1.26861	0.938577	0.854451	1.27276	1.18435	6	0.0650157	0.277283	0.295304	true	true	wrong	wrong	wrong	wrong	wrong	wrong		0.50964	0.523607	0.393401	0.459967	0.445274	0.225741	6	-1.28112	0.4493
Q9UJZ1	STOML2	Stomatin-like protein 2 OS=Homo sapiens GN=STOML2 PE=1 SV=1 - [STML2_HUMAN]	1.24213	1.45989	1.03098	0.872534			4	0.176492	0.322414	0.176812	true	true	wrong	wrong	wrong	wrong	wrong	wrong		1.68154	2.23512	3.58502			2.66492	4	1.29155	0.457791	0.00550764	true	true	true	wrong	wrong	wrong	wrong	wrong		0.939764	0.830319	0.219139			0.174517	4	-1.26663	1.2652
Q9Y4L1	HYOU1	Hypoxia up-regulated protein 1 OS=Homo sapiens GN=HYOU1 PE=1 SV=1 - [HYOU1_HUMAN]	0.694418					0.302835	2	-1.12476	0.846598	0.155686	true	wrong	wrong	wrong	wrong	wrong	wrong	wrong		1.69718					2.55021	2	1.05688	0.415411	0.0862906	true	wrong	true	wrong	wrong	wrong	wrong	wrong		0.92957					0.187198	2	-1.26136	1.63483
Q5UIP0	RIF1	Telomere-associated protein RIF1 OS=Homo sapiens GN=RIF1 PE=1 SV=2 - [RIF1_HUMAN]			0.322469				1	-1.63277	n.a.	n.a.	true	wrong	wrong	wrong	wrong	wrong	wrong	wrong				0.580338				1	-0.785035	n.a.	n.a.	true	wrong	wrong	wrong	wrong	wrong	wrong	wrong				0.417935				1	-1.25865	n.a.
P50395	GDI2	Rab GDP dissociation inhibitor beta OS=Homo sapiens GN=GDI2 PE=1 SV=2 - [GDIB_HUMAN]	0.709569					0.484229	2	-0.770612	0.389794	0.109337	true	wrong	wrong	wrong	wrong	wrong	wrong	wrong		1.88383					2.32317	2	1.06488	0.213844	0.0448991	true	wrong	true	wrong	wrong	wrong	wrong	wrong		0.672701					0.264364	2	-1.24568	0.952785
Q92621	NUP205	Nuclear pore complex protein Nup205 OS=Homo sapiens GN=NUP205 PE=1 SV=3 - [NU205_HUMAN]			0.373716				1	-1.41999	n.a.	n.a.	true	wrong	wrong	wrong	wrong	wrong	wrong	wrong				0.666481				1	-0.585364	n.a.	n.a.	true	wrong	wrong	wrong	wrong	wrong	wrong	wrong				0.422052				1	-1.24451	n.a.
Q96AG4	LRRC59	Leucine-rich repeat-containing protein 59 OS=Homo sapiens GN=LRRC59 PE=1 SV=1 - [LRC59_HUMAN]	0.601313		0.493458	0.45603		0.559845	4	-0.930628	0.179076	0.000950267	true	true	wrong	true	wrong	wrong	wrong	wrong		1.8051		2.38428	1.47053		2.54311	4	1.00214	0.366567	0.00601244	true	true	true	wrong	wrong	wrong	wrong	wrong		0.638227		0.30478	0.553963		0.300733	4	-1.2369	0.568433
O95486	SEC24A	Protein transport protein Sec24A OS=Homo sapiens GN=SEC24A PE=1 SV=2 - [SC24A_HUMAN]				0.331698	0.570569	0.655894	3	-1.00335	0.519653	0.0394835	true	true	wrong	wrong	wrong	wrong	wrong	wrong		0.865253	0.972868		0.592597	1.03482	0.551789	5	-0.362359	0.417365	0.062091	true	true	wrong	wrong	wrong	wrong	wrong	wrong					0.430348	0.339454	0.532297	3	-1.22828	0.324669
Q8NFH5	NUP35	Nucleoporin NUP53 OS=Homo sapiens GN=NUP35 PE=1 SV=1 - [NUP53_HUMAN]					0.421514		1	-1.24635	n.a.	n.a.	true	wrong	wrong	wrong	wrong	wrong	wrong	wrong						0.944141		1	-0.0829251	n.a.	n.a.	true	wrong	wrong	wrong	wrong	wrong	wrong	wrong						0.426929		1	-1.22793	n.a.
O43592	XPOT	Exportin-T OS=Homo sapiens GN=XPOT PE=1 SV=2 - [XPOT_HUMAN]		0.263043			0.23359	0.104033	3	-2.42982	0.728244	0.0143306	true	true	wrong	wrong	wrong	wrong	wrong	wrong			0.26349			0.236046	0.144986	3	-2.26435	0.458689	0.00670187	true	true	wrong	wrong	wrong	wrong	wrong	wrong			0.586694	0.302777		0.57071	0.334627	4	-1.22038	0.501575
Q9UBM7	DHCR7	7-dehydrocholesterol reductase OS=Homo sapiens GN=DHCR7 PE=1 SV=1 - [DHCR7_HUMAN]	0.351711	0.309705	0.410085			0.176236	4	-1.74725	0.531248	0.00357418	true	true	wrong	true	wrong	wrong	wrong	wrong		0.702644	0.7908	0.535193			0.320491	4	-0.847816	0.579389	0.0305846	true	true	wrong	wrong	wrong	wrong	wrong	wrong		0.440434	0.344909	0.516239			0.436037	4	-1.21752	0.239681
O14964	HGS	Hepatocyte growth factor-regulated tyrosine kinase substrate OS=Homo sapiens GN=HGS PE=1 SV=1 - [HGS_HUMAN]			0.684209				1	-0.547492	n.a.	n.a.	true	wrong	wrong	wrong	wrong	wrong	true	wrong				1.19521				1	0.257265	n.a.	n.a.	true	wrong	wrong	wrong	wrong	wrong	true	wrong				0.430348				1	-1.21642	n.a.
Q9UQ35	SRRM2	Serine/arginine repetitive matrix protein 2 OS=Homo sapiens GN=SRRM2 PE=1 SV=2 - [SRRM2_HUMAN]						0.285045	1	-1.81074	n.a.	n.a.	true	wrong	wrong	wrong	wrong	wrong	wrong	wrong				1.35056			0.640034	2	-0.105111	0.761793	0.438659	true	wrong	wrong	wrong	wrong	wrong	wrong	wrong							0.431973	1	-1.21099	n.a.
P52209	PGD	6-phosphogluconate dehydrogenase, decarboxylating OS=Homo sapiens GN=PGD PE=1 SV=3 - [6PGD_HUMAN]	1.10082		0.941964	1.35705		0.432321	4	-0.179257	0.720139	0.326401	true	true	wrong	wrong	wrong	wrong	wrong	wrong		2.27399		2.47137	1.99473		2.31873	4	1.17502	0.129778	0.000183684	true	true	true	true	wrong	true	wrong	wrong		0.576681		0.372505	0.906284		0.185815	4	-1.19721	0.973435
Q96CX2	KCTD12	BTB/POZ domain-containing protein KCTD12 OS=Homo sapiens GN=KCTD12 PE=1 SV=1 - [KCD12_HUMAN]	0.442655	0.527722	0.572082			0.291244	4	-1.17083	0.43432	0.00625133	true	true	wrong	wrong	wrong	wrong	wrong	wrong		1.57188	1.6965	2.1054			2.05325	4	0.881764	0.206676	0.00169082	true	true	wrong	true	wrong	wrong	wrong	wrong		0.531484	0.850354	0.372669			0.223202	4	-1.18334	0.815267
Q92626	PXDN	Peroxidasin homolog OS=Homo sapiens GN=PXDN PE=1 SV=2 - [PXDN_HUMAN]	0.266236	0.287271	0.424425	0.246443	0.260874	0.472998	6	-1.66408	0.401217	7.92244e-05	true	true	wrong	true	wrong	wrong	wrong	wrong		0.703047	0.948545	0.384222	0.679271	1.05206	0.321349	6	-0.68117	0.690449	0.0301861	true	true	wrong	wrong	wrong	wrong	wrong	wrong		0.386843	0.294985	0.855145	0.347162	0.239161	0.942669	6	-1.17211	0.822703
P78549	NTHL1	Endonuclease III-like protein 1 OS=Homo sapiens GN=NTHL1 PE=1 SV=2 - [NTHL1_HUMAN]							0	n.a.	n.a.	n.a.	true	wrong	wrong	wrong	wrong	wrong	wrong	wrong								0	n.a.	n.a.	n.a.	true	wrong	wrong	wrong	wrong	wrong	wrong	wrong					0.444141			1	-1.17091	n.a.
Q9H5H4	ZNF768	Zinc finger protein 768 OS=Homo sapiens GN=ZNF768 PE=1 SV=2 - [ZN768_HUMAN]	0.544776	0.516016		0.61601	0.629866	1.26251	5	-0.572068	0.52178	0.0351629	true	true	wrong	wrong	wrong	wrong	wrong	wrong		0.84381	1.04354		1.04208	1.49983	0.966542	5	0.0823314	0.307349	0.290726	true	true	wrong	wrong	wrong	wrong	wrong	wrong		0.478285	0.364458		0.408374	0.360878	0.673912	5	-1.17041	0.373839
Q08379	GOLGA2	Golgin subfamily A member 2 OS=Homo sapiens GN=GOLGA2 PE=1 SV=3 - [GOGA2_HUMAN]	0.750455		1.13677			0.937915	3	-0.107232	0.299823	0.299387	true	true	wrong	wrong	wrong	wrong	wrong	wrong		1.54728		1.58315			0.8657	3	0.361488	0.493521	0.166117	true	true	wrong	wrong	wrong	wrong	wrong	wrong		0.371381		0.443912			0.534079	3	-1.16852	0.262092
Q9Y3D9	MRPS23	28S ribosomal protein S23, mitochondrial OS=Homo sapiens GN=MRPS23 PE=1 SV=2 - [RT23_HUMAN]			0.566714	0.452084	0.747523		3	-0.794819	0.363384	0.0315733	true	true	wrong	wrong	wrong	wrong	wrong	wrong				0.968373	1.65869	1.68939	0.949337	4	0.341292	0.464439	0.118992	true	true	wrong	wrong	wrong	wrong	wrong	wrong				0.546326	0.309193	0.52614		3	-1.16402	0.459275
P68400	CSNK2A1	Casein kinase II subunit alpha OS=Homo sapiens GN=CSNK2A1 PE=1 SV=1 - [CSK21_HUMAN]	0.858653		0.927416				2	-0.164282	0.0785892	0.103827	true	wrong	wrong	wrong	wrong	wrong	wrong	wrong		2.41727		2.10775				2	1.17454	0.139775	0.0267223	true	wrong	true	wrong	wrong	wrong	wrong	wrong		0.458994		0.436779				2	-1.15924	0.0506088
Q9ULX3	NOB1	RNA-binding protein NOB1 OS=Homo sapiens GN=NOB1 PE=1 SV=1 - [NOB1_HUMAN]	0.672764		0.826563	0.608606		0.743461	4	-0.49768	0.189666	0.00673634	true	true	wrong	wrong	wrong	wrong	wrong	wrong		2.37489		1.43387	1.06012		1.22933	4	0.537468	0.505898	0.0618089	true	true	wrong	wrong	wrong	wrong	wrong	wrong		0.3105		0.485668	0.587183		0.460804	4	-1.1538	0.386099
O75828	CBR3	Carbonyl reductase [NADPH] 3 OS=Homo sapiens GN=CBR3 PE=1 SV=3 - [CBR3_HUMAN]			0.698968	0.579273	0.612416	0.379401	4	-0.852501	0.38114	0.0104095	true	true	wrong	wrong	wrong	wrong	wrong	wrong				0.85578	1.06524	1.11578	0.494015	4	-0.248211	0.539256	0.212584	true	true	wrong	wrong	wrong	wrong	wrong	wrong				0.599005	0.443124	0.511435	0.302666	4	-1.15129	0.421214
Q8NBJ5	GLT25D1	Procollagen galactosyltransferase 1 OS=Homo sapiens GN=GLT25D1 PE=1 SV=1 - [GT251_HUMAN]						0.0886384	1	-3.49592	n.a.	n.a.	true	wrong	wrong	wrong	wrong	wrong	wrong	wrong							7.55773	1	2.91795	n.a.	n.a.	true	wrong	true	wrong	wrong	wrong	wrong	wrong					1.23351		0.166047	2	-1.14378	2.04573
O14983	ATP2A1	Sarcoplasmic/endoplasmic reticulum calcium ATPase 1 OS=Homo sapiens GN=ATP2A1 PE=1 SV=1 - [AT2A1_HUMAN]	0.45893	0.484648	0.442676				3	-1.11477	0.0657951	0.00057957	true	true	wrong	true	wrong	wrong	wrong	wrong		1.0026	0.765783	0.606278				3	-0.367734	0.363153	0.110769	true	true	wrong	wrong	wrong	wrong	wrong	wrong		0.437919	0.529299	0.521349			0.34824	4	-1.14266	0.281595
P43686	PSMC4	26S protease regulatory subunit 6B OS=Homo sapiens GN=PSMC4 PE=1 SV=2 - [PRS6B_HUMAN]						0.435409	1	-1.19956	n.a.	n.a.	true	wrong	wrong	wrong	true	wrong	wrong	wrong							0.657093	1	-0.60583	n.a.	n.a.	true	wrong	wrong	wrong	wrong	wrong	wrong	wrong							0.45325	1	-1.14162	n.a.
Q6P5Z2	PKN3	Serine/threonine-protein kinase N3 OS=Homo sapiens GN=PKN3 PE=1 SV=1 - [PKN3_HUMAN]		0.0213234					1	-5.55142	n.a.	n.a.	true	wrong	wrong	wrong	wrong	wrong	wrong	wrong			0.0434689			0.0401871		2	-4.5805	0.0800808	0.00393486	true	wrong	wrong	true	wrong	wrong	wrong	wrong			0.455005					1	-1.13605	n.a.
P42694	HELZ	Probable helicase with zinc finger domain OS=Homo sapiens GN=HELZ PE=1 SV=2 - [HELZ_HUMAN]		0.280243	0.26388				2	-1.87865	0.0613737	0.00735182	true	wrong	wrong	wrong	wrong	wrong	wrong	wrong			0.846492	0.306627				2	-0.972937	1.03592	0.205419	true	wrong	wrong	wrong	wrong	wrong	wrong	wrong			0.322764	0.644239				2	-1.13289	0.705069
Q8WVM0	TFB1M	Dimethyladenosine transferase 1, mitochondrial OS=Homo sapiens GN=TFB1M PE=1 SV=1 - [TFB1M_HUMAN]	0.319632	0.314403	0.433818	0.308397	0.26775	0.453219	6	-1.54326	0.301262	2.85307e-05	true	true	wrong	true	wrong	wrong	wrong	wrong		0.730862	1.03655	0.476854	0.733295	1.19845	0.428731	6	-0.479524	0.588301	0.0511928	true	true	wrong	wrong	wrong	wrong	wrong	wrong		0.413163	0.327546	0.727688	0.389692	0.291858	0.843893	6	-1.12086	0.62551
P00403	MT-CO2	Cytochrome c oxidase subunit 2 OS=Homo sapiens GN=MT-CO2 PE=1 SV=1 - [COX2_HUMAN]				0.413612		0.484052	2	-1.16021	0.160432	0.031025	true	wrong	wrong	wrong	wrong	wrong	wrong	wrong					1.19295		1.31851	2	0.32672	0.102085	0.0692148	true	wrong	wrong	wrong	wrong	wrong	wrong	wrong					0.520836		0.411444	2	-1.11117	0.240512
Q15056	EIF4H	Eukaryotic translation initiation factor 4H OS=Homo sapiens GN=EIF4H PE=1 SV=5 - [IF4H_HUMAN]					6.66337	2.22372	2	1.94461	1.11954	0.12306	true	wrong	true	wrong	wrong	wrong	wrong	wrong							28.4839	1	4.83207	n.a.	n.a.	true	wrong	true	wrong	wrong	wrong	wrong	wrong					0.86863		0.247102	2	-1.11	1.28243
Q96RQ3	MCCC1	Methylcrotonoyl-CoA carboxylase subunit alpha, mitochondrial OS=Homo sapiens GN=MCCC1 PE=1 SV=3 - [MCCA_HUMAN]	0.25715	0.237202	0.389374	0.224167	0.191665	0.337806	6	-1.91706	0.383415	3.21023e-05	wrong	true	wrong	true	wrong	wrong	wrong	wrong		0.649474	0.707161	0.246188	0.637789	0.69941	0.212775	6	-1.09032	0.808139	0.0106811	wrong	true	wrong	wrong	wrong	wrong	wrong	wrong		0.369592	0.324072	1.05277	0.29316	0.259577	1.03366	6	-1.10928	0.921875
Q15005	SPCS2	Signal peptidase complex subunit 2 OS=Homo sapiens GN=SPCS2 PE=1 SV=3 - [SPCS2_HUMAN]				1.82534			1	0.868167	n.a.	n.a.	true	wrong	wrong	wrong	wrong	wrong	wrong	wrong					8.62971		11.3183	2	3.30495	0.276675	0.0188206	true	wrong	true	wrong	wrong	wrong	wrong	wrong					0.46354			1	-1.10924	n.a.
Q9UQ88	CDK11A	Cyclin-dependent kinase 11A OS=Homo sapiens GN=CDK11A PE=1 SV=4 - [CD11A_HUMAN]					0.0825494		1	-3.5986	n.a.	n.a.	true	wrong	wrong	wrong	wrong	wrong	wrong	wrong						0.0586877		1	-4.0908	n.a.	n.a.	true	wrong	wrong	wrong	wrong	wrong	wrong	wrong						0.464275		1	-1.10695	n.a.
Q9BVC6	TMEM109	Transmembrane protein 109 OS=Homo sapiens GN=TMEM109 PE=1 SV=1 - [TM109_HUMAN]	0.774032		0.460896		1.14119	0.294386	4	-0.765175	0.854816	0.0856713	true	true	wrong	wrong	wrong	wrong	wrong	wrong		1.61954		3.09675		1.77502	2.11008	4	1.05787	0.413417	0.00721983	true	true	true	wrong	wrong	wrong	wrong	wrong		0.926866		0.220797		1.21841	0.187697	4	-1.10433	1.38914
Q9BS26	ERP44	Endoplasmic reticulum resident protein 44 OS=Homo sapiens GN=ERP44 PE=1 SV=1 - [ERP44_HUMAN]			0.670122	0.675316	1.07329	0.529914	4	-0.489501	0.426464	0.0527052	true	true	wrong	wrong	wrong	wrong	wrong	wrong				4.23054	2.15921	2.37648	3.69475	4	1.58141	0.474078	0.00343327	true	true	true	true	wrong	true	wrong	wrong				0.307738	0.666618	1.00783	0.228887	4	-1.10033	0.98584
Q9UJS0	SLC25A13	Calcium-binding mitochondrial carrier protein Aralar2 OS=Homo sapiens GN=SLC25A13 PE=1 SV=2 - [CMC2_HUMAN]	0.280897	0.279269	0.285495	0.269821	0.2432	0.246099	6	-1.9055	0.101093	4.50053e-08	true	true	wrong	true	wrong	wrong	wrong	wrong		0.570975	0.626844	0.367527	0.571213	0.65583	0.305571	6	-1.00889	0.454881	0.00143273	true	true	wrong	true	wrong	wrong	wrong	wrong		0.545944	0.400962	0.569191	0.374536	0.395896	0.561581	6	-1.09845	0.286206
P27824	CANX	Calnexin OS=Homo sapiens GN=CANX PE=1 SV=2 - [CALX_HUMAN]			0.611251	0.891956	1.08084	0.559266	4	-0.400341	0.44942	0.0864207	true	true	wrong	wrong	wrong	wrong	wrong	wrong				4.32658	2.61729	2.17291	4.5871	4	1.70463	0.533039	0.00387062	true	true	true	true	wrong	true	wrong	wrong				0.270941	0.783813	1.21779	0.190306	4	-1.08618	1.26013
Q9UK76	HN1	Hematological and neurological expressed 1 protein OS=Homo sapiens GN=HN1 PE=1 SV=3 - [HN1_HUMAN]					1.37493	1.11802	2	0.310152	0.211011	0.142729	true	wrong	wrong	wrong	wrong	wrong	wrong	wrong						4.24817	10.134	2	2.71399	0.886917	0.0722858	true	wrong	true	wrong	wrong	wrong	wrong	wrong						0.955296	0.232665	2	-1.08483	1.44087
P53992	SEC24C	Protein transport protein Sec24C OS=Homo sapiens GN=SEC24C PE=1 SV=3 - [SC24C_HUMAN]		0.646192			0.84744	1.14018	3	-0.226507	0.409751	0.219686	true	true	wrong	wrong	wrong	wrong	wrong	wrong			1.03272			0.859249	1.65291	3	0.184204	0.486775	0.289751	true	true	wrong	wrong	wrong	wrong	wrong	wrong			0.55543			0.800414	0.240832	3	-1.07447	0.888221
O00411	POLRMT	DNA-directed RNA polymerase, mitochondrial OS=Homo sapiens GN=POLRMT PE=1 SV=2 - [RPOM_HUMAN]	0.412461	0.48647			0.364993	0.442426	4	-1.23695	0.174553	0.000380491	true	true	wrong	true	wrong	wrong	wrong	wrong		0.795233	1.05432			0.886623	0.473087	4	-0.376918	0.497654	0.113533	true	true	wrong	wrong	wrong	wrong	wrong	wrong		0.545709	0.436735			0.350197	0.615612	4	-1.07066	0.359655
P68363	TUBA1B	Tubulin alpha-1B chain OS=Homo sapiens GN=TUBA1B PE=1 SV=1 - [TBA1B_HUMAN]			0.295843			0.353734	2	-1.62818	0.182316	0.0251508	true	wrong	wrong	wrong	wrong	wrong	wrong	wrong				0.404489			0.391961	2	-1.32852	0.0320971	0.00543738	true	wrong	wrong	wrong	wrong	wrong	wrong	wrong				0.407013			0.559711	2	-1.06705	0.324992
Q9NUL7	DDX28	Probable ATP-dependent RNA helicase DDX28 OS=Homo sapiens GN=DDX28 PE=2 SV=2 - [DDX28_HUMAN]	0.322314	0.401839		0.353468	0.295156	0.354521	5	-1.54113	0.16682	1.62207e-05	true	true	wrong	true	wrong	wrong	wrong	wrong		0.416948	0.575168		0.481581	0.520435	0.269648	5	-1.18944	0.427185	0.00169449	true	true	wrong	true	wrong	wrong	wrong	wrong		0.515064	0.417413		0.515831	0.366213	0.620584	5	-1.06204	0.296405
P32322	PYCR1	Pyrroline-5-carboxylate reductase 1, mitochondrial OS=Homo sapiens GN=PYCR1 PE=1 SV=2 - [P5CR1_HUMAN]		0.485985	0.395124	0.389175		0.415599	4	-1.25222	0.146516	0.000218093	true	true	wrong	true	wrong	wrong	wrong	wrong			1.25504	1.35479	0.825135		0.904063	4	0.0857473	0.35022	0.328967	true	true	wrong	wrong	wrong	wrong	wrong	wrong			0.589087	0.310145	0.677126		0.442227	4	-1.04802	0.498068
Q9NV06	DCAF13	DDB1- and CUL4-associated factor 13 OS=Homo sapiens GN=DCAF13 PE=1 SV=2 - [DCA13_HUMAN]	1.07856					1.32958	2	0.260037	0.213453	0.167402	true	wrong	wrong	wrong	wrong	wrong	wrong	wrong							1.28388	1	0.360507	n.a.	n.a.	true	wrong	wrong	wrong	wrong	wrong	wrong	wrong							0.486123	1	-1.04061	n.a.
P04350	TUBB4A	Tubulin beta-4A chain OS=Homo sapiens GN=TUBB4A PE=1 SV=2 - [TBB4A_HUMAN]	0.289965	0.230586		0.282833	0.296546	0.397736	5	-1.76169	0.281302	7.54289e-05	true	true	wrong	true	wrong	wrong	wrong	wrong		0.875617	0.806355		0.642164	0.645432	0.373457	5	-0.638755	0.479479	0.0203924	true	true	wrong	wrong	wrong	wrong	wrong	wrong		0.382038	0.33035		0.468735	0.559028	0.845686	5	-1.03202	0.527389
O00763	ACACB	Acetyl-CoA carboxylase 2 OS=Homo sapiens GN=ACACB PE=1 SV=3 - [ACACB_HUMAN]	0.245724	0.231448	0.379048	0.221649	0.192905	0.348293	6	-1.93417	0.386375	3.19163e-05	wrong	true	wrong	true	wrong	wrong	wrong	wrong		0.633295	0.610065	0.265865	0.692575	0.611891	0.219181	6	-1.11861	0.730209	0.00663055	wrong	true	wrong	wrong	wrong	wrong	wrong	wrong		0.378889	0.357666	1.03834	0.307571	0.292931	1.12178	6	-1.02263	0.888551
P23193	TCEA1	Transcription elongation factor A protein 1 OS=Homo sapiens GN=TCEA1 PE=1 SV=2 - [TCEA1_HUMAN]				0.877304		0.318848	2	-0.918956	1.03253	0.213705	true	wrong	wrong	wrong	wrong	wrong	wrong	wrong					2.01011		5.41836	2	1.72257	1.01157	0.125281	true	wrong	true	wrong	wrong	wrong	wrong	wrong					1.56142		0.156308	2	-1.01734	2.34787
P04792	HSPB1	Heat shock protein beta-1 OS=Homo sapiens GN=HSPB1 PE=1 SV=2 - [HSPB1_HUMAN]		0.349154	0.34068	0.681864	0.35281	0.326186	5	-1.34866	0.447227	0.00126052	true	true	wrong	true	wrong	wrong	wrong	wrong			0.639517	0.523976		0.568438	0.451658	4	-0.884749	0.21077	0.00177242	true	true	wrong	true	wrong	wrong	wrong	wrong			0.532613	0.447293		0.548637	0.458495	4	-1.01516	0.149203
O75607	NPM3	Nucleoplasmin-3 OS=Homo sapiens GN=NPM3 PE=1 SV=3 - [NPM3_HUMAN]				1.21013		0.341183	2	-0.638111	1.29156	0.305876	true	wrong	wrong	wrong	wrong	wrong	wrong	wrong		0.771024			1.02929		0.894374	3	-0.164851	0.208427	0.152114	true	true	wrong	wrong	wrong	wrong	wrong	wrong					1.00961		0.243732	2	-1.01142	1.44987
P84103	SRSF3	Serine/arginine-rich splicing factor 3 OS=Homo sapiens GN=SRSF3 PE=1 SV=1 - [SRSF3_HUMAN]					0.570356	0.340449	2	-1.18228	0.526389	0.0970857	true	wrong	wrong	wrong	wrong	wrong	wrong	wrong						1.52309	3.03784	2	1.10502	0.704314	0.134782	true	wrong	true	wrong	wrong	wrong	wrong	wrong						1.03131	0.239093	2	-1.00994	1.49117
P57678	GEMIN4	Gem-associated protein 4 OS=Homo sapiens GN=GEMIN4 PE=1 SV=2 - [GEMI4_HUMAN]	0.588165				0.538574	0.571112	3	-0.822215	0.0646948	0.00102867	true	true	wrong	true	wrong	wrong	wrong	wrong		0.772247				1.02826	0.597104	3	-0.35887	0.392263	0.12696	true	true	wrong	wrong	wrong	wrong	wrong	wrong		0.619507				0.355952	0.55991	3	-1.00593	0.425731
P50454	SERPINH1	Serpin H1 OS=Homo sapiens GN=SERPINH1 PE=1 SV=2 - [SERPH_HUMAN]			0.719661		0.593818		2	-0.613259	0.196079	0.0707753	true	wrong	wrong	wrong	wrong	wrong	wrong	wrong				1.52418		1.54615		2	0.618356	0.0146002	0.00531393	true	wrong	wrong	wrong	wrong	wrong	wrong	wrong				0.490527		0.50757		2	-1.00296	0.0348433
P46939	UTRN	Utrophin OS=Homo sapiens GN=UTRN PE=1 SV=2 - [UTRO_HUMAN]						0.870945	1	-0.199347	n.a.	n.a.	true	wrong	wrong	wrong	wrong	wrong	wrong	wrong							2.07579	1	1.05366	n.a.	n.a.	true	wrong	true	wrong	wrong	wrong	wrong	wrong							0.499595	1	-1.00117	n.a.
Q6SPF0	SAMD1	Atherin OS=Homo sapiens GN=SAMD1 PE=1 SV=1 - [SAMD1_HUMAN]	0.492604	0.564953		0.50164	0.486665	0.440766	5	-1.0123	0.127857	2.98997e-05	true	true	wrong	true	wrong	wrong	wrong	wrong		0.893506	1.00107		0.882898	0.571946	0.318867	5	-0.559124	0.682718	0.0705101	true	true	wrong	wrong	wrong	wrong	wrong	wrong		0.525084	0.537576		0.504674	0.405235	0.54559	5	-0.99774	0.175948
Q9BXP5	SRRT	Serrate RNA effector molecule homolog OS=Homo sapiens GN=SRRT PE=1 SV=1 - [SRRT_HUMAN]	1.09561					0.559317	2	-0.353262	0.685893	0.299618	true	wrong	wrong	wrong	wrong	wrong	wrong	wrong		2.31385					3.21702	2	1.44801	0.336178	0.0517936	true	wrong	true	wrong	wrong	wrong	wrong	wrong		0.995166					0.25471	2	-0.990032	1.39023
Q9NX20	MRPL16	39S ribosomal protein L16, mitochondrial OS=Homo sapiens GN=MRPL16 PE=1 SV=1 - [RM16_HUMAN]	0.305082	0.470963			0.378423	0.309653	4	-1.47306	0.294218	0.00106003	true	true	wrong	true	wrong	wrong	wrong	wrong		0.982474	1.28369			1.55568	0.467417	4	-0.0312224	0.760901	0.469881	true	true	wrong	wrong	wrong	wrong	wrong	wrong		0.59302	0.444706			0.437321	0.560557	4	-0.987806	0.225925
Q14061	COX17	Cytochrome c oxidase copper chaperone OS=Homo sapiens GN=COX17 PE=1 SV=2 - [COX17_HUMAN]				0.237007	0.23857		2	-2.07226	0.00670735	0.000728521	true	wrong	wrong	true	wrong	wrong	wrong	wrong					0.427363	0.462926	0.452279	3	-1.16077	0.0593134	0.000434602	true	true	wrong	true	wrong	wrong	wrong	wrong					0.512245	0.49733		2	-0.98641	0.0301439
Q6P1L8	MRPL14	39S ribosomal protein L14, mitochondrial OS=Homo sapiens GN=MRPL14 PE=1 SV=1 - [RM14_HUMAN]		0.521576	0.523496	0.337916	0.544357	0.596047	5	-1.01239	0.318652	0.00103697	true	true	wrong	true	wrong	wrong	wrong	wrong			1.32761	0.611579	0.786366	1.53859	0.671968	5	-0.119841	0.598778	0.338829	true	true	wrong	wrong	wrong	wrong	wrong	wrong			0.490973	0.69446	0.423379	0.364844	0.653204	5	-0.972269	0.398269
O95433	AHSA1	Activator of 90 kDa heat shock protein ATPase homolog 1 OS=Homo sapiens GN=AHSA1 PE=1 SV=1 - [AHSA1_HUMAN]				0.47216		0.580588	2	-0.933533	0.210888	0.05042	true	wrong	wrong	wrong	wrong	wrong	wrong	wrong					1.22641		1.09243	2	0.210992	0.118022	0.119891	true	wrong	wrong	wrong	wrong	wrong	wrong	wrong					0.502745		0.51801	2	-0.970525	0.0305129
P06737	PYGL	Glycogen phosphorylase, liver form OS=Homo sapiens GN=PYGL PE=1 SV=4 - [PYGL_HUMAN]			0.915742	0.815734	1.31457	0.966186	4	-0.0189637	0.29393	0.452747	true	true	wrong	wrong	wrong	wrong	wrong	wrong				3.16699	2.28997	1.80587	2.47801	4	1.25508	0.334116	0.00244344	true	true	true	true	wrong	true	wrong	wrong				0.344399	0.514465	1.10024	0.349073	4	-0.969321	0.785405
Q9HCC0	MCCC2	Methylcrotonoyl-CoA carboxylase beta chain, mitochondrial OS=Homo sapiens GN=MCCC2 PE=1 SV=1 - [MCCB_HUMAN]	0.276719	0.260342	0.400899	0.237712	0.249179	0.388631	6	-1.75912	0.332061	2.42252e-05	wrong	true	wrong	true	wrong	wrong	wrong	wrong		0.676038	0.723963	0.255613	0.682699	0.74097	0.219871	6	-1.02788	0.816776	0.0136946	wrong	true	wrong	wrong	wrong	wrong	wrong	wrong		0.397978	0.341013	1.17007	0.331494	0.312215	1.11813	6	-0.960997	0.90221
Q9NQC3	RTN4	Reticulon-4 OS=Homo sapiens GN=RTN4 PE=1 SV=2 - [RTN4_HUMAN]					0.113107		1	-3.14424	n.a.	n.a.	true	wrong	wrong	wrong	wrong	wrong	wrong	wrong						0.402008	0.355423	2	-1.40355	0.125643	0.0201219	true	wrong	wrong	wrong	wrong	wrong	wrong	wrong						0.513749		1	-0.960864	n.a.
P63010	AP2B1	AP-2 complex subunit beta OS=Homo sapiens GN=AP2B1 PE=1 SV=1 - [AP2B1_HUMAN]		1.27625			1.24757	0.482545	3	-0.126742	0.800828	0.404855	true	true	wrong	wrong	wrong	wrong	wrong	wrong			1.07501			2.1553	1.53482	3	0.610105	0.501815	0.0849172	true	true	wrong	wrong	wrong	wrong	wrong	wrong			1.17683			0.559555	0.206884	3	-0.958614	1.25838
Q00325	SLC25A3	Phosphate carrier protein, mitochondrial OS=Homo sapiens GN=SLC25A3 PE=1 SV=2 - [MPCP_HUMAN]		0.241066	0.269062	0.195034	0.188623	0.359686	5	-2.03726	0.379462	0.000137988	true	true	wrong	true	wrong	wrong	wrong	wrong			0.551451	0.39998	0.531676	0.511259	0.350905	5	-1.11416	0.286505	0.000481468	true	true	wrong	true	wrong	wrong	wrong	wrong			0.483362	0.565327	0.435355	0.443752	0.6843	5	-0.958175	0.273632
O43824	GTPBP6	Putative GTP-binding protein 6 OS=Homo sapiens GN=GTPBP6 PE=2 SV=3 - [GTPB6_HUMAN]	0.52299	0.770619	0.639161	0.290861	0.926517		5	-0.769703	0.643585	0.0277798	true	true	wrong	wrong	wrong	wrong	wrong	wrong		0.880494	1.13	0.642941	0.683911	1.21131		5	-0.183218	0.412298	0.188314	true	true	wrong	wrong	wrong	wrong	wrong	wrong		0.537504	0.580718	0.690201	0.359097	0.470537		5	-0.955967	0.353502
P51571	SSR4	Translocon-associated protein subunit delta OS=Homo sapiens GN=SSR4 PE=1 SV=1 - [SSRD_HUMAN]		0.613645	0.458498				2	-0.914768	0.297329	0.0719092	true	wrong	wrong	wrong	wrong	wrong	wrong	wrong			1.29917	0.874893				2	0.092384	0.403341	0.400288	true	wrong	wrong	wrong	wrong	wrong	wrong	wrong			0.560848	0.476314				2	-0.952168	0.166664
Q9UNZ5	C19orf53	Leydig cell tumor 10 kDa protein homolog OS=Homo sapiens GN=C19orf53 PE=1 SV=1 - [L10K_HUMAN]				0.279909			1	-1.83697	n.a.	n.a.	true	wrong	wrong	wrong	wrong	wrong	wrong	wrong					0.420814			1	-1.24875	n.a.	n.a.	true	wrong	wrong	wrong	wrong	wrong	wrong	wrong					0.518283			1	-0.948188	n.a.
O00165	HAX1	HCLS1-associated protein X-1 OS=Homo sapiens GN=HAX1 PE=1 SV=2 - [HAX1_HUMAN]	0.160833	0.19788			0.144574	0.270637	4	-2.41234	0.398338	0.000605667	true	true	wrong	true	wrong	wrong	wrong	wrong		0.547251	0.451408		2.64932	0.409095	0.269369	5	-0.758688	1.26636	0.125703	true	true	wrong	wrong	wrong	wrong	wrong	wrong		0.363416	0.54131			0.426331	0.864512	4	-0.946444	0.544805
Q15758	SLC1A5	Neutral amino acid transporter B(0) OS=Homo sapiens GN=SLC1A5 PE=1 SV=2 - [AAAT_HUMAN]	0.484645	0.617156	0.429633	0.391819	0.4923		5	-1.06685	0.246995	0.000321444	true	true	wrong	true	wrong	wrong	wrong	wrong		0.677083	0.83665	0.609723	0.696761	0.93866	0.550261	6	-0.501346	0.285266	0.00383983	true	true	wrong	true	wrong	wrong	wrong	wrong		0.627265	0.690684	0.429649	0.475538	0.53148	0.418912	6	-0.944181	0.293804
Q8WTR4	GDPD5	Glycerophosphodiester phosphodiesterase domain-containing protein 5 OS=Homo sapiens GN=GDPD5 PE=2 SV=2 - [GDPD5_HUMAN]						0.887048	1	-0.172916	n.a.	n.a.	true	wrong	wrong	wrong	wrong	wrong	wrong	wrong							1.16125	1	0.215677	n.a.	n.a.	true	wrong	wrong	wrong	wrong	wrong	wrong	wrong							0.522457	1	-0.936617	n.a.
Q15437	SEC23B	Protein transport protein Sec23B OS=Homo sapiens GN=SEC23B PE=1 SV=2 - [SC23B_HUMAN]	0.629835	0.767503		0.581409	1.28313	0.774771	5	-0.367915	0.444627	0.0689726	true	true	wrong	wrong	wrong	wrong	wrong	wrong		0.880972	1.08081		0.81806	2.20248	0.62667	5	0.0208934	0.685554	0.474469	true	true	wrong	wrong	wrong	wrong	wrong	wrong		0.573502	0.554145		0.418271	0.454679	0.646624	5	-0.935472	0.256451
P43487	RANBP1	Ran-specific GTPase-activating protein OS=Homo sapiens GN=RANBP1 PE=1 SV=1 - [RANG_HUMAN]				0.984727	2.11911	0.651899	3	0.147992	0.863048	0.397235	true	true	wrong	wrong	wrong	wrong	wrong	wrong					2.18949	1.27471	1.99464	3	0.825629	0.417218	0.0377975	true	true	wrong	wrong	wrong	wrong	wrong	wrong					0.411851	1.59288	0.222604	3	-0.925206	1.45238
Q9H307	PNN	Pinin OS=Homo sapiens GN=PNN PE=1 SV=4 - [PININ_HUMAN]			0.303505		0.106521		2	-2.4755	1.06814	0.0942628	true	wrong	wrong	wrong	wrong	wrong	wrong	wrong				0.211336		0.387138		2	-1.80573	0.617522	0.0755225	true	wrong	wrong	wrong	wrong	wrong	wrong	wrong				1.07029		0.260572		2	-0.921121	1.44126
Q9UQM7	CAMK2A	Calcium/calmodulin-dependent protein kinase type II subunit alpha OS=Homo sapiens GN=CAMK2A PE=1 SV=2 - [KCC2A_HUMAN]					0.193495		1	-2.36964	n.a.	n.a.	true	wrong	wrong	wrong	wrong	wrong	true	wrong						0.350155		1	-1.51394	n.a.	n.a.	true	wrong	wrong	wrong	wrong	wrong	true	wrong						0.529199		1	-0.918117	n.a.
Q9NR31	SAR1A	GTP-binding protein SAR1a OS=Homo sapiens GN=SAR1A PE=1 SV=1 - [SAR1A_HUMAN]	3.92086						1	1.97117	n.a.	n.a.	true	wrong	true	wrong	wrong	wrong	wrong	wrong		7.16953						1	2.84188	n.a.	n.a.	true	wrong	true	wrong	wrong	wrong	wrong	wrong		0.536354						1	-0.898744	n.a.
A4D1E9	GTPBP10	GTP-binding protein 10 OS=Homo sapiens GN=GTPBP10 PE=1 SV=1 - [GTPBA_HUMAN]			0.507397			0.692852	2	-0.754096	0.317796	0.0921873	true	wrong	wrong	wrong	wrong	wrong	wrong	wrong				0.808092			0.782314	2	-0.330794	0.0330722	0.0224656	true	wrong	wrong	wrong	wrong	wrong	wrong	wrong				0.475712			0.604772	2	-0.898688	0.244874
Q15269	PWP2	Periodic tryptophan protein 2 homolog OS=Homo sapiens GN=PWP2 PE=1 SV=2 - [PWP2_HUMAN]		0.0487993	0.0566625		0.0719684	0.0883454	4	-3.94891	0.377595	0.000119518	true	true	wrong	true	wrong	wrong	wrong	wrong			0.236728	0.160098		0.144955	0.0698735	4	-2.83677	0.734726	0.00225754	true	true	wrong	true	wrong	wrong	wrong	wrong			0.256524	0.33564		0.601376	1.59945	4	-0.898482	1.16928
Q6I9Y2	THOC7	THO complex subunit 7 homolog OS=Homo sapiens GN=THOC7 PE=1 SV=3 - [THOC7_HUMAN]	0.480859	0.346484	0.852257		0.290195	0.512441	5	-1.11311	0.597587	0.00704369	true	true	wrong	wrong	wrong	wrong	wrong	wrong		0.892115	0.732474	0.566814		1.13261		4	-0.313313	0.423997	0.117978	true	true	wrong	wrong	wrong	wrong	wrong	wrong		0.535109	0.469896	1.14614		0.248755	0.620492	5	-0.898123	0.792071
P43307	SSR1	Translocon-associated protein subunit alpha OS=Homo sapiens GN=SSR1 PE=1 SV=3 - [SSRA_HUMAN]				0.302436	0.546302		2	-1.29876	0.603209	0.101005	true	wrong	wrong	wrong	wrong	wrong	wrong	wrong					0.664136	0.755835		2	-0.497153	0.13194	0.0590475	true	wrong	wrong	wrong	wrong	wrong	wrong	wrong					0.4159	0.692363		2	-0.898046	0.51993
Q5RKV6	EXOSC6	Exosome complex component MTR3 OS=Homo sapiens GN=EXOSC6 PE=1 SV=1 - [EXOS6_HUMAN]		0.209889		0.41147	0.218763		3	-1.90867	0.544273	0.0130253	true	true	wrong	wrong	wrong	wrong	wrong	wrong			0.365402			0.42766	0.175379	3	-1.72979	0.68639	0.0243421	true	true	wrong	wrong	wrong	wrong	wrong	wrong			0.576765			0.500198		2	-0.896686	0.1453
Q9UBX3	SLC25A10	Mitochondrial dicarboxylate carrier OS=Homo sapiens GN=SLC25A10 PE=1 SV=2 - [DIC_HUMAN]						0.327805	1	-1.60909	n.a.	n.a.	true	wrong	wrong	wrong	wrong	wrong	wrong	wrong							0.415948	1	-1.26553	n.a.	n.a.	true	wrong	wrong	wrong	wrong	wrong	wrong	wrong							0.538764	1	-0.892274	n.a.
Q96P11	NSUN5	Putative methyltransferase NSUN5 OS=Homo sapiens GN=NSUN5 PE=1 SV=2 - [NSUN5_HUMAN]	0.426664	0.615316	0.677197	0.466287	0.625904		5	-0.853695	0.29225	0.00141906	true	true	wrong	true	wrong	wrong	wrong	wrong		0.790089	1.05663	0.56133	0.947625	1.15053		5	-0.193766	0.410823	0.175538	true	true	wrong	wrong	wrong	wrong	wrong	wrong		0.519356	0.559294	0.890293	0.440589	0.402771		5	-0.889128	0.444725
P07954	FH	Fumarate hydratase, mitochondrial OS=Homo sapiens GN=FH PE=1 SV=3 - [FUMH_HUMAN]	0.570631	0.692734	0.479482	0.154156		0.335906	5	-1.33417	0.853502	0.0125005	true	true	wrong	wrong	wrong	wrong	wrong	wrong		1.20383	0.981952	1.51779				3	0.281109	0.314339	0.130752	true	true	wrong	wrong	wrong	wrong	wrong	wrong		0.741041	1.10314	0.379739			0.276503	4	-0.885579	0.905732
Q8WVM8	SCFD1	Sec1 family domain-containing protein 1 OS=Homo sapiens GN=SCFD1 PE=1 SV=4 - [SCFD1_HUMAN]					0.611747	0.494141	2	-0.863	0.217797	0.0562118	true	wrong	wrong	wrong	wrong	wrong	wrong	wrong						1.34265	1.40715	2	0.458928	0.0478662	0.0234334	true	wrong	wrong	wrong	wrong	wrong	wrong	wrong						0.730284	0.402	2	-0.884102	0.609004
Q96EY1	DNAJA3	DnaJ homolog subfamily A member 3, mitochondrial OS=Homo sapiens GN=DNAJA3 PE=1 SV=2 - [DNJA3_HUMAN]	0.315293	0.275998	0.230453	0.291047	0.17878	0.228464	6	-2.00572	0.298341	7.53531e-06	true	true	wrong	true	wrong	wrong	wrong	wrong		0.576097	0.596767	0.383883	0.548037	0.542256	0.311855	6	-1.05888	0.381189	0.000522111	true	true	wrong	true	wrong	wrong	wrong	wrong		0.707773	0.520955	0.528323	0.557569	0.411183	0.580978	6	-0.878048	0.254235
P49458	SRP9	Signal recognition particle 9 kDa protein OS=Homo sapiens GN=SRP9 PE=1 SV=2 - [SRP09_HUMAN]		0.293749	0.510047	0.339212	0.418194	0.432301	5	-1.35321	0.312118	0.000316814	true	true	wrong	true	wrong	wrong	wrong	wrong			0.911784	0.565798	0.842485	1.28708	0.517086	5	-0.357915	0.536528	0.105029	true	true	wrong	wrong	wrong	wrong	wrong	wrong			0.405242	0.869547	0.472522	0.398817	0.732254	5	-0.872428	0.515722
O76031	CLPX	ATP-dependent Clp protease ATP-binding subunit clpX-like, mitochondrial OS=Homo sapiens GN=CLPX PE=1 SV=2 - [CLPX_HUMAN]				0.386193	0.334048	0.24031	3	-1.6705	0.350716	0.00718819	true	true	wrong	wrong	wrong	wrong	wrong	wrong					0.53719	0.550684	0.38206	3	-1.04844	0.294721	0.0126713	true	true	wrong	wrong	wrong	wrong	wrong	wrong					0.560771	0.626708	0.464954	3	-0.871164	0.217678
Q96GD4	AURKB	Aurora kinase B OS=Homo sapiens GN=AURKB PE=1 SV=3 - [AURKB_HUMAN]	0.253647	0.257951	0.323999			0.33292	4	-1.78666	0.209054	0.00021811	true	true	wrong	true	wrong	wrong	wrong	wrong		0.784168	0.970306	0.372364	0.473213		0.361569	5	-0.873312	0.644591	0.0193999	true	true	wrong	wrong	wrong	wrong	wrong	wrong		0.373228	0.42508	0.769978			0.738105	4	-0.867819	0.537479
Q02978	SLC25A11	Mitochondrial 2-oxoglutarate/malate carrier protein OS=Homo sapiens GN=SLC25A11 PE=1 SV=3 - [M2OM_HUMAN]	0.403121	0.349524	0.402271	0.32445	0.283037	0.342488	6	-1.52196	0.194092	3.5269e-06	true	true	wrong	true	wrong	wrong	wrong	wrong		0.813593	0.884603	0.424045	0.566013	1.01561	0.373923	6	-0.655026	0.594344	0.0214028	true	true	wrong	wrong	wrong	wrong	wrong	wrong		0.567492	0.445377	0.807129	0.474492	0.384161	0.734126	6	-0.865838	0.421385
O15067	PFAS	Phosphoribosylformylglycinamidine synthase OS=Homo sapiens GN=PFAS PE=1 SV=4 - [PUR4_HUMAN]	1.02494				1.17167	0.64721	3	-0.121192	0.449136	0.343107	true	true	wrong	wrong	wrong	wrong	wrong	wrong		0.972227				1.27809	0.9502	3	0.079885	0.237954	0.309862	true	true	wrong	wrong	wrong	wrong	wrong	wrong		0.730393		0.451599		0.728349	0.380765	4	-0.862616	0.480974
Q9NX58	LYAR	Cell growth-regulating nucleolar protein OS=Homo sapiens GN=LYAR PE=1 SV=2 - [LYAR_HUMAN]			0.7305				1	-0.453044	n.a.	n.a.	true	wrong	wrong	wrong	wrong	wrong	wrong	wrong				0.995081				1	-0.00711374	n.a.	n.a.	true	wrong	wrong	wrong	wrong	wrong	wrong	wrong				0.550242				1	-0.861863	n.a.
P08559	PDHA1	Pyruvate dehydrogenase E1 component subunit alpha, somatic form, mitochondrial OS=Homo sapiens GN=PDHA1 PE=1 SV=3 - [ODPA_HUMAN]	0.652284	0.747206	0.53929		0.65726	0.439996	5	-0.743524	0.298213	0.00253664	true	true	wrong	true	wrong	wrong	wrong	wrong		0.965625	1.16059	1.2155		0.825178	1.40716	5	0.132301	0.300063	0.189997	true	true	wrong	wrong	wrong	wrong	wrong	wrong		0.729174	0.694315	0.399706		0.766035	0.338432	5	-0.850514	0.549797
P82933	MRPS9	28S ribosomal protein S9, mitochondrial OS=Homo sapiens GN=MRPS9 PE=1 SV=2 - [RT09_HUMAN]		0.587367	0.610044	0.374358		0.585549	4	-0.917581	0.334367	0.00594942	true	true	wrong	wrong	wrong	wrong	wrong	wrong			1.26765	0.843874	0.841886		0.724287	4	-0.154104	0.346543	0.219658	true	true	wrong	wrong	wrong	wrong	wrong	wrong			0.519719	0.620977	0.464751		0.631162	4	-0.850244	0.212295
Q07666	KHDRBS1	KH domain-containing, RNA-binding, signal transduction-associated protein 1 OS=Homo sapiens GN=KHDRBS1 PE=1 SV=1 - [KHDR1_HUMAN]	0.780484	0.622504			0.19708		3	-1.12818	1.06476	0.103949	true	true	wrong	wrong	wrong	wrong	wrong	wrong		0.551858	0.770819			0.62878		3	-0.634181	0.242967	0.0228029	true	true	wrong	wrong	wrong	wrong	wrong	wrong		1.09068	0.622937			0.25467		3	-0.843639	1.05846
P29372	MPG	DNA-3-methyladenine glycosylase OS=Homo sapiens GN=MPG PE=1 SV=3 - [3MG_HUMAN]	0.355263	0.573447	0.692989	0.370277	0.502029	0.659579	6	-0.975378	0.411775	0.00107196	true	true	wrong	true	wrong	wrong	wrong	wrong		0.824105	1.08065	0.513683	0.748771	1.24968	0.469724	6	-0.385701	0.563458	0.07722	true	true	wrong	wrong	wrong	wrong	wrong	wrong		0.454661	0.474377	0.988123	0.427452	0.348487	0.95689	6	-0.840139	0.638178
P41223	BUD31	Protein BUD31 homolog OS=Homo sapiens GN=BUD31 PE=1 SV=2 - [BUD31_HUMAN]	0.916716		0.941921				2	-0.105887	0.02767	0.0581606	true	wrong	wrong	wrong	wrong	wrong	wrong	wrong		2.02462		1.84551				2	0.950834	0.0944924	0.0223313	true	wrong	wrong	wrong	wrong	wrong	wrong	wrong		0.603379		0.521235				2	-0.83443	0.149293
Q969G3	SMARCE1	SWI/SNF-related matrix-associated actin-dependent regulator of chromatin subfamily E member 1 OS=Homo sapiens GN=SMARCE1 PE=1 SV=2 - [SMCE1_HUMAN]							0	n.a.	n.a.	n.a.	true	wrong	wrong	wrong	wrong	wrong	wrong	wrong								0	n.a.	n.a.	n.a.	true	wrong	wrong	wrong	wrong	wrong	wrong	wrong					0.524892	0.599619		2	-0.833895	n.a.
Q8WU90	ZC3H15	Zinc finger CCCH domain-containing protein 15 OS=Homo sapiens GN=ZC3H15 PE=1 SV=1 - [ZC3HF_HUMAN]	0.942973	1.12261		0.899501	1.02381	0.983759	5	-0.0120677	0.121807	0.417764	true	true	wrong	wrong	wrong	wrong	wrong	wrong		1.32641	1.00493		4.72249	2.32164	1.0244	5	0.780819	0.950145	0.0699956	true	true	wrong	wrong	wrong	wrong	wrong	wrong		0.646227	1.07544		0.300111	0.415009	0.643622	5	-0.833178	0.701069
Q99729	HNRNPAB	Heterogeneous nuclear ribonucleoprotein A/B OS=Homo sapiens GN=HNRNPAB PE=1 SV=2 - [ROAA_HUMAN]	1.25906	1.33053	0.786934		1.41789	0.60961	5	0.0376729	0.537637	0.441542	true	true	wrong	wrong	wrong	wrong	wrong	wrong		1.3474	1.56923	1.7783		2.9027	1.42986	5	0.792801	0.442832	0.00804343	true	true	wrong	wrong	wrong	wrong	wrong	wrong		1.00965	0.915473	0.365211		0.51493	0.323339	5	-0.830636	0.749764
Q3ZCQ8	TIMM50	Mitochondrial import inner membrane translocase subunit TIM50 OS=Homo sapiens GN=TIMM50 PE=1 SV=2 - [TIM50_HUMAN]				0.628151		0.400692	2	-0.995125	0.458642	0.100282	true	wrong	wrong	wrong	wrong	wrong	wrong	wrong					1.51406		1.14328	2	0.395804	0.286548	0.150605	true	wrong	wrong	wrong	wrong	wrong	wrong	wrong					0.568104		0.557177	2	-0.829784	0.0198132
Q9BW19	KIFC1	Kinesin-like protein KIFC1 OS=Homo sapiens GN=KIFC1 PE=1 SV=2 - [KIFC1_HUMAN]	0.347455	0.437952	0.658373	0.337174	0.381263	0.455095	6	-1.23577	0.355213	0.000183071	true	true	wrong	true	wrong	wrong	wrong	wrong		0.829483	1.02271	0.550406	0.724846	1.01408	0.433984	6	-0.457853	0.49484	0.0363828	true	true	wrong	wrong	wrong	wrong	wrong	wrong		0.446641	0.452978	0.967687	0.425716	0.37208	1.05866	6	-0.821466	0.658766
P63092	GNAS	Guanine nucleotide-binding protein G(s) subunit alpha isoforms short OS=Homo sapiens GN=GNAS PE=1 SV=1 - [GNAS2_HUMAN]	0.383658					0.428584	2	-1.30223	0.112966	0.0195007	true	wrong	wrong	wrong	wrong	wrong	wrong	wrong		0.995049		0.863981			0.998838	3	-0.0732558	0.11926	0.199411	true	true	wrong	wrong	wrong	wrong	wrong	wrong		0.643962					0.4985	2	-0.819643	0.261191
Q8NI60	ADCK3	Chaperone activity of bc1 complex-like, mitochondrial OS=Homo sapiens GN=ADCK3 PE=1 SV=1 - [ADCK3_HUMAN]	0.285485	0.244825		0.280045	0.257872	0.294287	5	-1.87899	0.110148	1.41061e-06	true	true	wrong	true	wrong	wrong	wrong	wrong		0.519961	0.612101		0.514287	0.574301	0.265734	5	-1.06462	0.484957	0.00399663	true	true	wrong	true	wrong	wrong	wrong	wrong		0.5915	0.430571		0.54733	0.506696	0.829508	5	-0.818645	0.35058
P61160	ACTR2	Actin-related protein 2 OS=Homo sapiens GN=ACTR2 PE=1 SV=1 - [ARP2_HUMAN]		0.932996	0.798366				2	-0.212468	0.158973	0.1549	true	wrong	wrong	wrong	wrong	wrong	wrong	wrong			1.89652	1.99441				2	0.959659	0.0513397	0.0120355	true	wrong	wrong	wrong	wrong	wrong	wrong	wrong			0.720392	0.448832				2	-0.81445	0.482676
Q9NP81	SARS2	Serine--tRNA ligase, mitochondrial OS=Homo sapiens GN=SARS2 PE=1 SV=1 - [SYSM_HUMAN]	0.524692		0.312596				2	-1.30404	0.52833	0.0888115	true	wrong	wrong	wrong	wrong	wrong	wrong	wrong		1.1852		1.42302				2	0.377046	0.186552	0.107127	true	wrong	wrong	wrong	wrong	wrong	wrong	wrong		0.77454		0.420728				2	-0.808815	0.622574
Q9NXF1	TEX10	Testis-expressed sequence 10 protein OS=Homo sapiens GN=TEX10 PE=1 SV=2 - [TEX10_HUMAN]				0.534297			1	-0.904286	n.a.	n.a.	true	wrong	wrong	wrong	wrong	wrong	wrong	wrong					0.856143			1	-0.224076	n.a.	n.a.	true	wrong	wrong	wrong	wrong	wrong	wrong	wrong					0.570889			1	-0.808718	n.a.
P37108	SRP14	Signal recognition particle 14 kDa protein OS=Homo sapiens GN=SRP14 PE=1 SV=2 - [SRP14_HUMAN]	0.343381	0.406734	0.534023	0.287137	0.32426	0.445306	6	-1.38951	0.328596	7.21895e-05	true	true	wrong	true	wrong	wrong	wrong	wrong		0.592218	0.791162	0.354179	0.522155	0.785401	0.321821	6	-0.918804	0.554667	0.0048762	true	true	wrong	true	wrong	wrong	wrong	wrong		0.537169	0.490284	1.04522	0.466413	0.316631	0.894355	6	-0.796929	0.639386
O15269	SPTLC1	Serine palmitoyltransferase 1 OS=Homo sapiens GN=SPTLC1 PE=1 SV=1 - [SPTC1_HUMAN]	0.306196						1	-1.70747	n.a.	n.a.	true	wrong	wrong	wrong	wrong	wrong	wrong	wrong		0.521759						1	-0.938545	n.a.	n.a.	true	wrong	wrong	wrong	wrong	wrong	wrong	wrong		0.576193						1	-0.795376	n.a.
Q86XN8	MEX3D	RNA-binding protein MEX3D OS=Homo sapiens GN=MEX3D PE=1 SV=3 - [MEX3D_HUMAN]		0.65324					1	-0.614315	n.a.	n.a.	true	wrong	wrong	wrong	wrong	wrong	wrong	wrong			1.11074					1	0.15152	n.a.	n.a.	true	wrong	wrong	wrong	wrong	wrong	wrong	wrong			0.577503					1	-0.7921	n.a.
Q7Z7K6	CENPV	Centromere protein V OS=Homo sapiens GN=CENPV PE=1 SV=1 - [CENPV_HUMAN]		0.0677847					1	-3.8829	n.a.	n.a.	true	wrong	wrong	wrong	wrong	wrong	wrong	wrong			0.164875	0.115377				2	-2.85806	0.364168	0.0286018	true	wrong	wrong	wrong	wrong	wrong	wrong	wrong			0.581442					1	-0.782292	n.a.
O95487	SEC24B	Protein transport protein Sec24B OS=Homo sapiens GN=SEC24B PE=1 SV=2 - [SC24B_HUMAN]	0.531036	0.655452	0.763143	0.397717	0.758957	0.672573	6	-0.702144	0.361781	0.00254329	true	true	wrong	true	wrong	wrong	wrong	wrong		0.925244	1.24488	0.809101	0.994113	1.13435	0.696794	6	-0.0749234	0.308848	0.289114	true	true	wrong	wrong	wrong	wrong	wrong	wrong		0.596419	0.529585	0.720502	0.373769	0.677741	0.672567	6	-0.781469	0.350602
Q15014	MORF4L2	Mortality factor 4-like protein 2 OS=Homo sapiens GN=MORF4L2 PE=1 SV=1 - [MO4L2_HUMAN]	0.4618	0.672445		0.351674	0.550686		4	-1.01389	0.396768	0.00724686	true	true	wrong	wrong	wrong	wrong	wrong	wrong		0.70902	0.716228		0.52601	0.726214		4	-0.591496	0.224011	0.00662066	true	true	wrong	wrong	wrong	wrong	wrong	wrong		0.552168	0.725556		0.427666	0.66976		4	-0.780848	0.33941
P38935	IGHMBP2	DNA-binding protein SMUBP-2 OS=Homo sapiens GN=IGHMBP2 PE=1 SV=3 - [SMBP2_HUMAN]					0.430456	0.457312	2	-1.1724	0.0617395	0.0118473	true	wrong	wrong	wrong	wrong	wrong	wrong	wrong						0.930352	0.610601	2	-0.407924	0.4296	0.203746	true	wrong	wrong	wrong	wrong	wrong	wrong	wrong						0.545841	0.630797	2	-0.769099	0.14757
Q9UNF1	MAGED2	Melanoma-associated antigen D2 OS=Homo sapiens GN=MAGED2 PE=1 SV=2 - [MAGD2_HUMAN]	0.304993	0.260391	0.245017	0.132588	0.0756542		5	-2.46457	0.839391	0.00139226	true	true	wrong	true	wrong	wrong	wrong	wrong		0.362916	0.250583	0.226645	0.304593	0.240799		5	-1.87391	0.280088	5.81477e-05	true	true	wrong	true	wrong	wrong	wrong	wrong		0.743789	0.971654	0.813846	0.397026	0.299347		5	-0.767698	0.729663
P22061	PCMT1	Protein-L-isoaspartate(D-aspartate) O-methyltransferase OS=Homo sapiens GN=PCMT1 PE=1 SV=4 - [PIMT_HUMAN]		1.14285	0.677552		1.13431	1.08463	4	-0.0174846	0.364267	0.464787	true	true	wrong	wrong	wrong	wrong	wrong	wrong			2.32673	2.00569		1.72389	1.5768	4	0.916269	0.247128	0.00253702	true	true	wrong	true	wrong	wrong	wrong	wrong			0.61847	0.327393		0.857155	0.686425	4	-0.767332	0.595677
O95372	LYPLA2	Acyl-protein thioesterase 2 OS=Homo sapiens GN=LYPLA2 PE=1 SV=1 - [LYPA2_HUMAN]					0.325098		1	-1.62105	n.a.	n.a.	true	wrong	wrong	wrong	wrong	wrong	wrong	wrong						0.526267		1	-0.926133	n.a.	n.a.	true	wrong	wrong	wrong	wrong	wrong	wrong	wrong						0.589492		1	-0.762455	n.a.
P62753	RPS6	40S ribosomal protein S6 OS=Homo sapiens GN=RPS6 PE=1 SV=1 - [RS6_HUMAN]	0.427709	0.437884	0.64889	0.388366	0.345263	0.492077	6	-1.1604	0.314078	0.00013767	true	true	wrong	true	wrong	wrong	wrong	wrong		0.625459	0.744545	0.490669	0.47462	0.754113	0.407248	6	-0.818014	0.369071	0.00143699	true	true	wrong	true	wrong	wrong	wrong	wrong		0.581804	0.49083	0.878251	0.610725	0.370958	0.745119	6	-0.760321	0.439165
Q6P4A7	SFXN4	Sideroflexin-4 OS=Homo sapiens GN=SFXN4 PE=1 SV=1 - [SFXN4_HUMAN]	0.331598			0.336505			2	-1.5819	0.0149851	0.00213211	true	wrong	wrong	true	wrong	wrong	wrong	wrong		0.552605			0.522357			2	-0.896285	0.0574264	0.0144113	true	wrong	wrong	wrong	wrong	wrong	wrong	wrong		0.59078			0.591203			2	-0.75879	0.000730829
Q9Y2Q9	MRPS28	28S ribosomal protein S28, mitochondrial OS=Homo sapiens GN=MRPS28 PE=1 SV=1 - [RT28_HUMAN]	0.295512			0.597236	1.399	0.435509	4	-0.804292	0.954163	0.0952047	true	true	wrong	wrong	wrong	wrong	wrong	wrong		0.696356			1.5499	3.23415	0.990791	4	0.447526	0.955483	0.208995	true	true	wrong	wrong	wrong	wrong	wrong	wrong		0.735649			0.623478	0.731742	0.36469	4	-0.757588	0.478117
Q4LEZ3	AARD	Alanine and arginine-rich domain-containing protein OS=Homo sapiens GN=AARD PE=2 SV=1 - [AARD_HUMAN]						3.85659	1	1.94733	n.a.	n.a.	true	wrong	true	wrong	wrong	wrong	wrong	wrong							4.44944	1	2.15362	n.a.	n.a.	true	wrong	true	wrong	wrong	wrong	wrong	wrong							0.591648	1	-0.757188	n.a.
Q9H7E9	C8orf33	UPF0488 protein C8orf33 OS=Homo sapiens GN=C8orf33 PE=1 SV=1 - [CH033_HUMAN]					0.333765	0.375065	2	-1.49894	0.11901	0.0178517	true	wrong	wrong	wrong	wrong	wrong	wrong	wrong						0.836759	0.664809	2	-0.423053	0.234669	0.118982	true	wrong	wrong	wrong	wrong	wrong	wrong	wrong						0.53282	0.657751	2	-0.756333	0.214884
Q9Y3Z3	SAMHD1	SAM domain and HD domain-containing protein 1 OS=Homo sapiens GN=SAMHD1 PE=1 SV=2 - [SAMH1_HUMAN]				0.326527	0.36325	3.37071	3	-0.440878	1.90156	0.36342	true	true	wrong	wrong	wrong	wrong	wrong	wrong					1.73254	0.662367	0.751427	3	-0.0712338	0.753867	0.44252	true	true	wrong	wrong	wrong	wrong	wrong	wrong					0.548322	0.936157	0.405989	3	-0.754189	0.610508
Q96N67	DOCK7	Dedicator of cytokinesis protein 7 OS=Homo sapiens GN=DOCK7 PE=1 SV=4 - [DOCK7_HUMAN]			0.81189				1	-0.300644	n.a.	n.a.	true	wrong	wrong	wrong	wrong	wrong	wrong	wrong				0.963867		2.35206		2	0.590416	0.910061	0.263688	true	wrong	wrong	wrong	wrong	wrong	wrong	wrong				0.593476				1	-0.752738	n.a.
P49411	TUFM	Elongation factor Tu, mitochondrial OS=Homo sapiens GN=TUFM PE=1 SV=2 - [EFTU_HUMAN]	0.705212	0.766578	0.514632	0.723899	0.770972	0.576035	6	-0.580486	0.240428	0.000984573	true	true	wrong	true	wrong	wrong	wrong	wrong		1.01177	1.12749	0.884573	1.23129	1.05971	0.845348	6	0.025754	0.206611	0.386209	true	true	wrong	wrong	wrong	wrong	wrong	wrong		0.767853	0.761621	0.46933	0.492668	0.706268	0.460102	6	-0.751379	0.361185
Q13085	ACACA	Acetyl-CoA carboxylase 1 OS=Homo sapiens GN=ACACA PE=1 SV=2 - [ACACA_HUMAN]	0.287532	0.285749	0.484977	0.253926	0.260601	0.452977	6	-1.61825	0.413963	0.000105201	wrong	true	wrong	true	wrong	wrong	wrong	wrong		0.698554	0.669551	0.275676	0.68793	0.661382	0.234863	6	-1.03024	0.735613	0.00931204	wrong	true	wrong	wrong	wrong	wrong	wrong	wrong		0.416786	0.43201	1.36177	0.342341	0.382941	1.37832	6	-0.749399	0.939457
Q53GS9	USP39	U4/U6.U5 tri-snRNP-associated protein 2 OS=Homo sapiens GN=USP39 PE=1 SV=2 - [SNUT2_HUMAN]	0.525232	0.82008		0.541347	0.799649	0.672	5	-0.599307	0.302419	0.00570549	true	true	wrong	wrong	wrong	wrong	wrong	wrong		1.00509	1.09301		0.852435	1.17231	0.546039	5	-0.147656	0.440215	0.247474	true	true	wrong	wrong	wrong	wrong	wrong	wrong		0.485964	0.661646		0.553685	0.62774	0.675217	5	-0.74563	0.199207
Q9BWF3	RBM4	RNA-binding protein 4 OS=Homo sapiens GN=RBM4 PE=1 SV=1 - [RBM4_HUMAN]		1.43454	0.697301				2	0.00021878	0.735907	0.499866	true	wrong	wrong	wrong	wrong	wrong	wrong	wrong			2.44734	3.71655				2	1.59259	0.426207	0.0595314	true	wrong	true	wrong	wrong	wrong	wrong	wrong			1.21193	0.297077				2	-0.736889	1.4343
P11310	ACADM	Medium-chain specific acyl-CoA dehydrogenase, mitochondrial OS=Homo sapiens GN=ACADM PE=1 SV=1 - [ACADM_HUMAN]	0.695496	0.585255	0.420798		0.384756	0.359469	5	-1.07992	0.411628	0.00210796	true	true	wrong	true	wrong	wrong	wrong	wrong		0.95577	0.962447	1.0326		0.780005	0.984645	5	-0.0909956	0.155748	0.130732	true	true	wrong	wrong	wrong	wrong	wrong	wrong		0.988336	0.824912	0.379073		0.653037	0.39175	5	-0.732165	0.624772
Q96IJ6	GMPPA	Mannose-1-phosphate guanyltransferase alpha OS=Homo sapiens GN=GMPPA PE=1 SV=1 - [GMPPA_HUMAN]	0.606607	0.532998	0.463454			0.61555	4	-0.85963	0.190956	0.00144631	true	true	wrong	true	wrong	wrong	wrong	wrong		1.08256	0.949352	1.30887			1.28367	4	0.197015	0.219131	0.0849976	true	true	wrong	wrong	wrong	wrong	wrong	wrong		0.909465	0.912121	0.454843			0.353802	4	-0.726289	0.698831
P49593	PPM1F	Protein phosphatase 1F OS=Homo sapiens GN=PPM1F PE=1 SV=3 - [PPM1F_HUMAN]	0.383091	0.484045	0.631336	0.231988	0.420082	0.514412	6	-1.23545	0.494498	0.000844771	true	true	wrong	true	wrong	wrong	wrong	wrong		0.72777	0.954601	0.60015	0.745939	0.744149	0.254425	6	-0.680996	0.668534	0.0274072	true	true	wrong	wrong	wrong	wrong	wrong	wrong		0.532104	0.65774	0.814934	0.292895	0.556622	1.07162	6	-0.721144	0.636151
Q8N766	KIAA0090	Uncharacterized protein KIAA0090 OS=Homo sapiens GN=KIAA0090 PE=1 SV=1 - [K0090_HUMAN]					0.933833	0.762146	2	-0.245312	0.207251	0.171411	true	wrong	wrong	wrong	wrong	wrong	wrong	wrong						1.82789	1.82421	2	0.868724	0.00205328	0.000531988	true	wrong	wrong	true	wrong	wrong	wrong	wrong						0.794757	0.463016	2	-0.72114	0.551155
Q7RTV0	PHF5A	PHD finger-like domain-containing protein 5A OS=Homo sapiens GN=PHF5A PE=1 SV=1 - [PHF5A_HUMAN]		0.357538	0.316118				2	-1.57265	0.125606	0.0179578	true	wrong	wrong	wrong	wrong	wrong	wrong	wrong			0.695136	0.425924				2	-0.877981	0.499712	0.121792	true	wrong	wrong	wrong	wrong	wrong	wrong	wrong			0.576696	0.638577				2	-0.720592	0.10398
O95816	BAG2	BAG family molecular chaperone regulator 2 OS=Homo sapiens GN=BAG2 PE=1 SV=1 - [BAG2_HUMAN]		0.239781	0.358812		0.21307	0.345215	4	-1.82599	0.376024	0.00115924	true	true	wrong	true	wrong	wrong	wrong	wrong			0.51195	0.329366		0.535776	0.332366	4	-1.2644	0.383518	0.00354985	true	true	wrong	true	wrong	wrong	wrong	wrong			0.494601	0.882162		0.409918	0.76337	4	-0.718171	0.519062
Q9BTC8	MTA3	Metastasis-associated protein MTA3 OS=Homo sapiens GN=MTA3 PE=1 SV=2 - [MTA3_HUMAN]		0.51544		0.335588			2	-1.26568	0.437779	0.0763524	true	wrong	wrong	wrong	wrong	wrong	wrong	wrong			0.73119		0.582261			2	-0.615972	0.232342	0.0829674	true	wrong	wrong	wrong	wrong	wrong	wrong	wrong			0.695821		0.531852			2	-0.717057	0.274139
Q9H0D6	XRN2	5'-3' exoribonuclease 2 OS=Homo sapiens GN=XRN2 PE=1 SV=1 - [XRN2_HUMAN]	0.450705				0.496559		2	-1.07985	0.0988407	0.0205732	true	wrong	wrong	wrong	wrong	wrong	wrong	wrong		0.859514				0.673439		2	-0.394394	0.248883	0.133597	true	wrong	wrong	wrong	wrong	wrong	wrong	wrong		0.519223				0.713052		2	-0.716747	0.323608
P53985	SLC16A1	Monocarboxylate transporter 1 OS=Homo sapiens GN=SLC16A1 PE=1 SV=3 - [MOT1_HUMAN]	0.316007	0.33198				0.201266	3	-1.85521	0.3979	0.0074948	true	true	wrong	wrong	wrong	wrong	wrong	wrong		0.424245	0.456628				0.323572	3	-1.33193	0.261707	0.00631293	true	true	wrong	wrong	wrong	wrong	wrong	wrong		0.738635	0.721896				0.430731	3	-0.707448	0.439987
P42167	TMPO	Lamina-associated polypeptide 2, isoforms beta/gamma OS=Homo sapiens GN=TMPO PE=1 SV=2 - [LAP2B_HUMAN]	0.421727	0.343824	0.391335	0.421637		0.111433	5	-1.71022	0.822513	0.00483303	true	true	wrong	true	wrong	wrong	wrong	wrong		0.493369	0.487663	0.484594	0.496507		0.368066	5	-1.11051	0.185798	9.06204e-05	true	true	wrong	true	wrong	wrong	wrong	wrong		0.852841	0.74405	0.719059	0.839125		0.225038	5	-0.70736	0.814459
Q9H2W6	MRPL46	39S ribosomal protein L46, mitochondrial OS=Homo sapiens GN=MRPL46 PE=1 SV=1 - [RM46_HUMAN]		0.994218	0.839595		0.868811		3	-0.154496	0.128935	0.0868078	true	true	wrong	wrong	wrong	wrong	wrong	wrong			1.84408	1.10796		2.07983	1.4155	4	0.647147	0.405641	0.0248415	true	true	wrong	wrong	wrong	wrong	wrong	wrong			0.658693	0.709209		0.497366		3	-0.701886	0.270085
P53007	SLC25A1	Tricarboxylate transport protein, mitochondrial OS=Homo sapiens GN=SLC25A1 PE=1 SV=2 - [TXTP_HUMAN]		0.275771		0.188662	0.391843	0.322701	4	-1.81199	0.44705	0.00196181	true	true	wrong	true	wrong	wrong	wrong	wrong			0.728163		0.23727	0.891367	0.316862	4	-1.08926	0.921504	0.0495158	true	true	wrong	wrong	wrong	wrong	wrong	wrong			0.433317		0.849722	0.484388	0.811587	4	-0.697097	0.500468
Q9P035	PTPLAD1	3-hydroxyacyl-CoA dehydratase 3 OS=Homo sapiens GN=PTPLAD1 PE=1 SV=2 - [HACD3_HUMAN]		0.472121	0.450929	0.30128			3	-1.32087	0.356568	0.01172	true	true	wrong	wrong	wrong	wrong	wrong	wrong			0.731176	0.611066	0.410784			3	-0.815285	0.425686	0.0400531	true	true	wrong	wrong	wrong	wrong	wrong	wrong			0.632505	0.55364	0.67095			3	-0.696518	0.142028
P30837	ALDH1B1	Aldehyde dehydrogenase X, mitochondrial OS=Homo sapiens GN=ALDH1B1 PE=1 SV=3 - [AL1B1_HUMAN]		0.679926			0.624168		2	-0.618272	0.0872876	0.0316717	true	wrong	wrong	wrong	wrong	wrong	wrong	wrong			1.06734			1.04072	0.377044	3	-0.41853	0.856402	0.243212	true	true	wrong	wrong	wrong	wrong	wrong	wrong			0.643871			0.591702		2	-0.696106	0.0861968
Q8IWJ2	GCC2	GRIP and coiled-coil domain-containing protein 2 OS=Homo sapiens GN=GCC2 PE=1 SV=4 - [GCC2_HUMAN]			0.549981		0.476597		2	-0.965852	0.146096	0.0339168	true	wrong	wrong	wrong	wrong	wrong	wrong	wrong				0.790295		0.990126		2	-0.176927	0.229966	0.236587	true	wrong	wrong	wrong	wrong	wrong	wrong	wrong				0.657757		0.579217		2	-0.696099	0.129721
Q12962	TAF10	Transcription initiation factor TFIID subunit 10 OS=Homo sapiens GN=TAF10 PE=1 SV=1 - [TAF10_HUMAN]	0.339188	0.222014	0.279235		0.200413	0.26932	5	-1.95663	0.296811	6.16396e-05	true	true	wrong	true	wrong	wrong	wrong	wrong		0.397731	0.494271	0.331781		0.461712	0.320207	5	-1.33926	0.278583	0.000212268	true	true	wrong	true	wrong	wrong	wrong	wrong		0.877831	0.471442	0.797303		0.445254	0.614743	5	-0.693775	0.438099
P31930	UQCRC1	Cytochrome b-c1 complex subunit 1, mitochondrial OS=Homo sapiens GN=UQCRC1 PE=1 SV=3 - [QCR1_HUMAN]	1.21383	1.59876	0.977475	1.3992		1.03668	5	0.292045	0.295206	0.045705	true	true	wrong	wrong	wrong	wrong	wrong	wrong		1.80599	1.89206	2.25177	3.18689		3.6353	5	1.29561	0.451491	0.00151581	true	true	true	true	wrong	true	wrong	wrong		0.910042	1.14418	0.452099	0.554432		0.358256	5	-0.683765	0.697766
Q7Z6Z7	HUWE1	E3 ubiquitin-protein ligase HUWE1 OS=Homo sapiens GN=HUWE1 PE=1 SV=3 - [HUWE1_HUMAN]	0.460213		0.450062			1.33605	3	-0.617819	0.897166	0.177642	true	true	wrong	wrong	wrong	wrong	wrong	wrong		0.748051		0.798964			0.45299	3	-0.628346	0.447752	0.0678274	true	true	wrong	wrong	wrong	wrong	wrong	wrong		0.527262		0.371584			1.2459	3	-0.678151	0.89819
Q13423	NNT	NAD(P) transhydrogenase, mitochondrial OS=Homo sapiens GN=NNT PE=1 SV=3 - [NNTM_HUMAN]					0.735292	0.688348	2	-0.491201	0.0673012	0.0307429	true	wrong	wrong	wrong	wrong	wrong	wrong	wrong						1.47451	1.68407	2	0.656092	0.135563	0.0461794	true	wrong	wrong	wrong	wrong	wrong	wrong	wrong						0.819766	0.478881	2	-0.674489	0.548392
O14979	HNRPDL	Heterogeneous nuclear ribonucleoprotein D-like OS=Homo sapiens GN=HNRPDL PE=1 SV=3 - [HNRDL_HUMAN]	0.900271	0.497922	0.5582	0.650119	1.07281	0.40596	6	-0.636525	0.52902	0.0159932	true	true	wrong	wrong	wrong	wrong	wrong	wrong		0.943337	0.523108	1.55145	1.74028	2.54973	1.2696	6	0.351447	0.790226	0.162839	true	true	wrong	wrong	wrong	wrong	wrong	wrong		1.32843	1.32877	0.405837	0.48559	0.57221	0.309747	6	-0.669936	0.886519
Q9NSE4	IARS2	Isoleucine--tRNA ligase, mitochondrial OS=Homo sapiens GN=IARS2 PE=1 SV=2 - [SYIM_HUMAN]	0.545057		0.485437		0.714821	0.464814	4	-0.876946	0.279121	0.00406974	true	true	wrong	true	wrong	wrong	wrong	wrong		1.28704		1.40431		0.810288	1.20934	4	0.206162	0.351092	0.162486	true	true	wrong	wrong	wrong	wrong	wrong	wrong		0.669766		0.419577		1.32101	0.423145	4	-0.6676	0.779416
Q9HDC5	JPH1	Junctophilin-1 OS=Homo sapiens GN=JPH1 PE=1 SV=2 - [JPH1_HUMAN]	0.275914	0.301391		0.307859	0.296546	0.38371	5	-1.68465	0.179354	1.51865e-05	true	true	wrong	true	wrong	wrong	wrong	wrong		0.410722	0.503449		0.450458	0.557835	0.292104	5	-1.20838	0.357916	0.000824746	true	true	wrong	true	wrong	wrong	wrong	wrong		0.647785	0.576192		0.614324	0.499392	0.882149	5	-0.661476	0.303157
P60891	PRPS1	Ribose-phosphate pyrophosphokinase 1 OS=Homo sapiens GN=PRPS1 PE=1 SV=2 - [PRPS1_HUMAN]				0.145352	0.467929	0.16466	3	-2.16015	0.926273	0.0280876	true	true	wrong	wrong	wrong	wrong	wrong	wrong						1.2399	1.02856	2	0.175426	0.190633	0.208549	true	wrong	wrong	wrong	wrong	wrong	wrong	wrong					0.717005	1.20014	0.293713	3	-0.661419	1.02746
Q92796	DLG3	Disks large homolog 3 OS=Homo sapiens GN=DLG3 PE=1 SV=2 - [DLG3_HUMAN]							0	n.a.	n.a.	n.a.	true	wrong	wrong	wrong	wrong	wrong	wrong	wrong								0	n.a.	n.a.	n.a.	true	wrong	wrong	wrong	wrong	wrong	wrong	wrong			0.632505					1	-0.660851	n.a.
Q04760	GLO1	Lactoylglutathione lyase OS=Homo sapiens GN=GLO1 PE=1 SV=4 - [LGUL_HUMAN]	2.50385		1.41772		3.81728	1.06197	4	0.961753	0.826506	0.051201	true	true	wrong	wrong	wrong	wrong	wrong	wrong		3.96472		5.1198		5.22488	5.3671	4	2.28821	0.202588	9.49828e-05	true	true	true	true	wrong	true	wrong	wrong		1.08522		0.36394		1.2244	0.333507	4	-0.658096	1.0005
Q13409	DYNC1I2	Cytoplasmic dynein 1 intermediate chain 2 OS=Homo sapiens GN=DYNC1I2 PE=1 SV=3 - [DC1I2_HUMAN]	0.480215	0.46343	0.452177	0.49897	0.227981	0.478337	6	-1.25213	0.434245	0.000439848	true	true	wrong	true	wrong	wrong	wrong	wrong		0.709232	0.634646	0.700589	0.641719	0.592949	0.587251	6	-0.637827	0.115298	1.96098e-05	true	true	wrong	true	wrong	wrong	wrong	wrong		0.768684	0.780619	0.530317	0.842022	0.401255	0.60702	6	-0.656264	0.410061
O15235	MRPS12	28S ribosomal protein S12, mitochondrial OS=Homo sapiens GN=MRPS12 PE=1 SV=1 - [RT12_HUMAN]	0.375848	0.566624		0.30346	0.54021	0.910027	5	-0.995233	0.608264	0.0108033	true	true	wrong	wrong	wrong	wrong	wrong	wrong		0.453843	1.16378		0.542164	1.0229	0.525751	5	-0.539801	0.618749	0.0614249	true	true	wrong	wrong	wrong	wrong	wrong	wrong		0.811064	0.477644		0.459778	0.505525	1.18206	5	-0.646386	0.596222
Q9Y2R9	MRPS7	28S ribosomal protein S7, mitochondrial OS=Homo sapiens GN=MRPS7 PE=1 SV=2 - [RT07_HUMAN]		0.566474	0.524004		0.478574	0.529021	4	-0.933515	0.0999034	0.000167213	true	true	wrong	true	wrong	wrong	wrong	wrong			1.10336	0.806837		0.997613	0.664574	4	-0.190172	0.326027	0.163837	true	true	wrong	wrong	wrong	wrong	wrong	wrong			0.649852	0.63069		0.591975	0.701237	4	-0.638808	0.101446
P24752	ACAT1	Acetyl-CoA acetyltransferase, mitochondrial OS=Homo sapiens GN=ACAT1 PE=1 SV=1 - [THIL_HUMAN]	1.00816	1.33576	0.651352	1.23747		0.368158	5	-0.264664	0.771296	0.242847	true	true	wrong	wrong	wrong	wrong	wrong	wrong		0.965535	0.891402	1.32127	0.92403		1.5611	5	0.14281	0.358999	0.211996	true	true	wrong	wrong	wrong	wrong	wrong	wrong		1.1915	1.33602	0.365131	1.13325		0.167909	5	-0.635317	1.32216
Q96C57	C12orf43	Uncharacterized protein C12orf43 OS=Homo sapiens GN=C12orf43 PE=1 SV=2 - [CL043_HUMAN]		1.06037	0.370216				2	-0.674493	1.07348	0.268757	true	wrong	wrong	wrong	wrong	wrong	wrong	wrong			1.41981	1.7028				2	0.636803	0.185414	0.0646318	true	wrong	wrong	wrong	wrong	wrong	wrong	wrong			1.36292	0.304114				2	-0.63531	1.53019
P56537	EIF6	Eukaryotic translation initiation factor 6 OS=Homo sapiens GN=EIF6 PE=1 SV=1 - [IF6_HUMAN]	0.485186	0.258327	0.287384				3	-1.59836	0.486727	0.0147736	true	true	wrong	wrong	wrong	wrong	wrong	wrong		0.440624	0.423954	0.754147				3	-0.942494	0.464515	0.0361491	true	true	wrong	wrong	wrong	wrong	wrong	wrong		1.22045	0.675753	0.324598				3	-0.633764	0.957173
Q9BUF5	TUBB6	Tubulin beta-6 chain OS=Homo sapiens GN=TUBB6 PE=1 SV=1 - [TBB6_HUMAN]	0.250011	0.225988	0.234222	0.270965	0.231397	0.313328	6	-1.98488	0.179304	6.38061e-07	true	true	wrong	true	wrong	wrong	wrong	wrong		0.575084	0.516914	0.378596	0.548146	0.426185	0.332582	6	-1.13958	0.317448	0.000157823	true	true	wrong	true	wrong	wrong	wrong	wrong		0.56608	0.62719	0.619905	0.60106	0.638671	0.853061	6	-0.632397	0.206697
P25685	DNAJB1	DnaJ homolog subfamily B member 1 OS=Homo sapiens GN=DNAJB1 PE=1 SV=4 - [DNJB1_HUMAN]		0.695844	0.447838				2	-0.841057	0.44957	0.115028	true	wrong	wrong	wrong	wrong	wrong	wrong	wrong			1.93648	2.81634			2.42157	3	1.24107	0.271876	0.00781139	true	true	true	wrong	wrong	wrong	wrong	wrong			1.07813	0.386135				2	-0.632145	1.04748
Q15436	SEC23A	Protein transport protein Sec23A OS=Homo sapiens GN=SEC23A PE=1 SV=2 - [SC23A_HUMAN]	0.526646	0.620719		0.488499	0.533424	0.506213	5	-0.907097	0.132256	5.27249e-05	true	true	wrong	true	wrong	wrong	wrong	wrong		0.577421	0.920366		0.713722	0.720718	0.48854	5	-0.580906	0.34743	0.0100717	true	true	wrong	wrong	wrong	wrong	wrong	wrong		0.733349	0.617966		0.561993	0.63455	0.693117	5	-0.631646	0.149115
Q99661	KIF2C	Kinesin-like protein KIF2C OS=Homo sapiens GN=KIF2C PE=1 SV=2 - [KIF2C_HUMAN]	0.605925		0.834229	0.502478	0.756444	0.769647	5	-0.551514	0.300246	0.00738192	true	true	wrong	wrong	wrong	wrong	wrong	wrong		0.650783	0.816077	0.736883	1.10922	1.22844	0.746756	6	-0.221396	0.362759	0.0975824	true	true	wrong	wrong	wrong	wrong	wrong	wrong		0.913849		0.746209	0.412285	0.589492	0.703845	5	-0.619946	0.431761
Q02543	RPL18A	60S ribosomal protein L18a OS=Homo sapiens GN=RPL18A PE=1 SV=2 - [RL18A_HUMAN]	0.566512	0.505354	0.810496		0.54517	0.50822	5	-0.791854	0.281886	0.00164006	true	true	wrong	true	wrong	wrong	wrong	wrong		0.566918	0.672466	0.534692		0.779644	0.400986	5	-0.794392	0.362532	0.00402272	true	true	wrong	true	wrong	wrong	wrong	wrong		0.791683	0.594318	0.920395		0.391149	0.697721	5	-0.616172	0.473453
Q9P258	RCC2	Protein RCC2 OS=Homo sapiens GN=RCC2 PE=1 SV=2 - [RCC2_HUMAN]	0.546681	0.67771	0.712962	0.430235	0.681168	0.496332	6	-0.783656	0.295429	0.000644438	true	true	wrong	true	wrong	wrong	wrong	wrong		0.649943	0.750155	0.702607	0.683222	0.691432	0.619966	6	-0.55287	0.0947389	1.50979e-05	true	true	wrong	true	wrong	wrong	wrong	wrong		0.791195	0.868842	0.732562	0.527677	0.73877	0.392773	6	-0.616169	0.433133
P08195	SLC3A2	4F2 cell-surface antigen heavy chain OS=Homo sapiens GN=SLC3A2 PE=1 SV=3 - [4F2_HUMAN]	0.449255	0.433171	0.36371	0.414014	0.39228	0.33868	6	-1.33414	0.154989	2.22321e-06	true	true	wrong	true	wrong	wrong	wrong	wrong		0.612663	0.543194	0.562659	0.618362	0.574664	0.554262	6	-0.793501	0.0771575	9.19905e-07	true	true	wrong	true	wrong	wrong	wrong	wrong		0.837433	0.776768	0.515452	0.686213	0.706283	0.480651	6	-0.613063	0.322896
Q01469	FABP5	Fatty acid-binding protein, epidermal OS=Homo sapiens GN=FABP5 PE=1 SV=3 - [FABP5_HUMAN]				0.680168	0.78329		2	-0.454209	0.144006	0.0702002	true	wrong	wrong	wrong	wrong	wrong	wrong	wrong					0.801566		0.985702	2	-0.169942	0.210951	0.229304	true	wrong	wrong	wrong	wrong	wrong	wrong	wrong					1.07476		0.398433	2	-0.611789	1.0123
O94905	ERLIN2	Erlin-2 OS=Homo sapiens GN=ERLIN2 PE=1 SV=1 - [ERLN2_HUMAN]	0.529295	0.6337	0.581298	0.413108	0.6003	0.266561	6	-1.04629	0.474745	0.001473	true	true	wrong	true	wrong	wrong	wrong	wrong		0.724541	0.801694	0.491533	0.529232	0.953875		5	-0.558907	0.404103	0.01824	true	true	wrong	wrong	wrong	wrong	wrong	wrong		0.67544	0.725989	0.832587	0.604429	0.564156	0.573939	6	-0.607604	0.219047
O14929	HAT1	Histone acetyltransferase type B catalytic subunit OS=Homo sapiens GN=HAT1 PE=1 SV=1 - [HAT1_HUMAN]	1.01317	0.998604	0.906049			1.25001	4	0.0491132	0.19546	0.324929	true	true	wrong	wrong	wrong	wrong	wrong	wrong		1.89535	1.23624	1.92879			5.81399	4	1.17891	0.954387	0.045012	true	true	true	wrong	wrong	wrong	wrong	wrong		0.887238	1.33995	0.599192			0.260633	4	-0.607312	1.00697
O75439	PMPCB	Mitochondrial-processing peptidase subunit beta OS=Homo sapiens GN=PMPCB PE=1 SV=2 - [MPPB_HUMAN]		0.993622	0.788982	0.628073		0.574601	4	-0.455382	0.354371	0.0412433	true	true	wrong	wrong	wrong	wrong	wrong	wrong			1.38785	1.68837	0.927485		1.17216	4	0.337263	0.366923	0.0816545	true	true	wrong	wrong	wrong	wrong	wrong	wrong			0.937033	0.48123	0.91546		0.457275	4	-0.601332	0.567578
O60762	DPM1	Dolichol-phosphate mannosyltransferase OS=Homo sapiens GN=DPM1 PE=1 SV=1 - [DPM1_HUMAN]	0.613142		0.682947	0.562078		0.706583	4	-0.647021	0.150593	0.00165666	true	true	wrong	true	wrong	wrong	wrong	wrong		0.834109		0.542457	1.25621		0.708029	4	-0.328287	0.507436	0.143154	true	true	wrong	wrong	wrong	wrong	wrong	wrong		0.719785		0.946953	0.40811		0.679524	4	-0.600842	0.506499
O75477	ERLIN1	Erlin-1 OS=Homo sapiens GN=ERLIN1 PE=1 SV=1 - [ERLN1_HUMAN]	0.447632	0.458527	0.458761	0.38844	0.540656	0.434976	6	-1.14353	0.154071	4.62691e-06	true	true	wrong	true	wrong	wrong	wrong	wrong		0.788582	0.707616	0.455059	0.746339	1.0231	0.496824	6	-0.562642	0.437017	0.0126379	true	true	wrong	wrong	wrong	wrong	wrong	wrong		0.613151	0.70006	0.833927	0.627261	0.557038	0.657945	6	-0.60052	0.198827
P17482	HOXB9	Homeobox protein Hox-B9 OS=Homo sapiens GN=HOXB9 PE=1 SV=2 - [HXB9_HUMAN]	0.420607	0.622103	0.788564		0.355019	0.7234	5	-0.847619	0.501386	0.00971628	true	true	wrong	wrong	wrong	wrong	wrong	wrong		1.51707	1.35453	0.77487		1.18722	0.676799	5	0.0710988	0.510351	0.385485	true	true	wrong	wrong	wrong	wrong	wrong	wrong		0.469723	0.660065	0.931484		0.386019	1.12754	5	-0.598381	0.648758
Q99496	RNF2	E3 ubiquitin-protein ligase RING2 OS=Homo sapiens GN=RNF2 PE=1 SV=1 - [RING2_HUMAN]				0.699579			1	-0.51544	n.a.	n.a.	true	wrong	wrong	wrong	wrong	wrong	wrong	wrong					0.968979			1	-0.045463	n.a.	n.a.	true	wrong	wrong	wrong	wrong	wrong	wrong	wrong					0.661238			1	-0.596759	n.a.
O75382	TRIM3	Tripartite motif-containing protein 3 OS=Homo sapiens GN=TRIM3 PE=1 SV=2 - [TRIM3_HUMAN]	0.543283	0.672128	0.892178	0.509794	0.655003	0.915616	6	-0.554607	0.351714	0.00592483	true	true	wrong	wrong	wrong	wrong	wrong	wrong		0.941707	1.07405	0.639103	0.784901	1.1342	0.55428	6	-0.274755	0.415254	0.083002	true	true	wrong	wrong	wrong	wrong	wrong	wrong		0.528464	0.557683	1.00449	0.517132	0.506988	1.07788	6	-0.596554	0.509588
Q14697	GANAB	Neutral alpha-glucosidase AB OS=Homo sapiens GN=GANAB PE=1 SV=3 - [GANAB_HUMAN]	0.557822		0.463745		0.413922	0.659185	4	-0.956134	0.295703	0.00375133	true	true	wrong	true	wrong	wrong	wrong	wrong		1.55461		2.79672		1.22609	2.92243	4	0.99038	0.622754	0.0250346	true	true	wrong	wrong	wrong	wrong	wrong	wrong		0.956456		0.367095		1.26107	0.434505	4	-0.594479	0.863886
P05141	SLC25A5	ADP/ATP translocase 2 OS=Homo sapiens GN=SLC25A5 PE=1 SV=7 - [ADT2_HUMAN]	0.456903	0.478359	0.529998	0.476555	0.469051	0.57018	6	-1.01363	0.123401	2.80328e-06	true	true	wrong	true	wrong	wrong	wrong	wrong		0.833164	0.934491	0.452094	1.36172	1.02785	0.399173	6	-0.391038	0.696927	0.113864	true	true	wrong	wrong	wrong	wrong	wrong	wrong		0.63411	0.591015	0.944557	0.377189	0.564535	1.12417	6	-0.593477	0.56367
P61964	WDR5	WD repeat-containing protein 5 OS=Homo sapiens GN=WDR5 PE=1 SV=1 - [WDR5_HUMAN]				0.432899			1	-1.2079	n.a.	n.a.	true	wrong	wrong	wrong	wrong	wrong	wrong	wrong					0.597779			1	-0.742315	n.a.	n.a.	true	wrong	wrong	wrong	wrong	wrong	wrong	wrong					0.66347			1	-0.591897	n.a.
Q96L58	B3GALT6	Beta-1,3-galactosyltransferase 6 OS=Homo sapiens GN=B3GALT6 PE=2 SV=2 - [B3GT6_HUMAN]	0.694869	0.793644	0.741545				3	-0.430006	0.0958834	0.00808631	true	true	wrong	wrong	wrong	wrong	wrong	wrong		1.00352	1.39847	0.722086				3	0.00638592	0.476805	0.491799	true	true	wrong	wrong	wrong	wrong	wrong	wrong		0.679606	0.556717	0.772572				3	-0.591491	0.238218
Q5C9Z4	NOM1	Nucleolar MIF4G domain-containing protein 1 OS=Homo sapiens GN=NOM1 PE=1 SV=1 - [NOM1_HUMAN]	0.442659						1	-1.17573	n.a.	n.a.	true	wrong	wrong	wrong	wrong	wrong	wrong	wrong		0.649266						1	-0.623119	n.a.	n.a.	true	wrong	wrong	wrong	wrong	wrong	wrong	wrong		0.668621						1	-0.580739	n.a.
P13804	ETFA	Electron transfer flavoprotein subunit alpha, mitochondrial OS=Homo sapiens GN=ETFA PE=1 SV=1 - [ETFA_HUMAN]			0.556132	0.513515	0.644872	0.50829	4	-0.854303	0.158584	0.000855039	true	true	wrong	true	wrong	wrong	wrong	wrong				1.31318	1.20571	1.06319	0.817766	4	0.115277	0.297902	0.247684	true	true	wrong	wrong	wrong	wrong	wrong	wrong				0.459807	0.587591	0.883175	0.845704	4	-0.577255	0.44817
P63104	YWHAZ	14-3-3 protein zeta/delta OS=Homo sapiens GN=YWHAZ PE=1 SV=1 - [1433Z_HUMAN]		1.42079	0.652697	0.552903	0.936159	0.693	5	-0.317594	0.536446	0.128073	true	true	wrong	wrong	wrong	wrong	wrong	wrong			0.952466	1.27761	1.01151	0.982772	1.09711	5	0.081668	0.169775	0.171323	true	true	wrong	wrong	wrong	wrong	wrong	wrong			1.46136	0.384982	0.499696	1.11501	0.43239	5	-0.576649	0.869335
P48730	CSNK1D	Casein kinase I isoform delta OS=Homo sapiens GN=CSNK1D PE=1 SV=2 - [KC1D_HUMAN]	0.525392	0.733121	0.811881	0.449663	0.302636		5	-0.910899	0.571716	0.0117649	true	true	wrong	wrong	wrong	wrong	wrong	wrong		0.786519	0.970306	0.568744	0.646925	1.26991		5	-0.297538	0.462532	0.111852	true	true	wrong	wrong	wrong	wrong	wrong	wrong		0.583885	0.660159	0.955907	0.567232	0.436115	0.997967	6	-0.576427	0.463588
P46087	NOP2	Putative ribosomal RNA methyltransferase NOP2 OS=Homo sapiens GN=NOP2 PE=1 SV=2 - [NOP2_HUMAN]	0.389038	0.173426			0.198841	0.263898	4	-2.03547	0.514961	0.00210966	true	true	wrong	true	wrong	wrong	wrong	wrong		0.617968	0.422581			0.440513	0.262227	4	-1.26274	0.508769	0.00785054	true	true	wrong	wrong	wrong	wrong	wrong	wrong		0.769946	0.533543			0.594456	0.867778	4	-0.559614	0.324505
Q9BZE4	GTPBP4	Nucleolar GTP-binding protein 1 OS=Homo sapiens GN=GTPBP4 PE=1 SV=3 - [NOG1_HUMAN]				0.399567	0.271623	0.281896	3	-1.67686	0.307197	0.0055014	true	true	wrong	wrong	wrong	wrong	wrong	wrong					0.586172	0.59552	0.224201	3	-1.22517	0.807183	0.0596676	true	true	wrong	wrong	wrong	wrong	wrong	wrong					0.700871	0.476693	0.937598	3	-0.558202	0.489538
Q9BXK1	KLF16	Krueppel-like factor 16 OS=Homo sapiens GN=KLF16 PE=1 SV=1 - [KLF16_HUMAN]	0.305956	0.35055	0.476996	0.197864	0.252247	0.621957	6	-1.54975	0.603001	0.000743699	true	true	wrong	true	wrong	wrong	wrong	wrong		0.396717	0.586712	0.278389	0.514259	0.499062	0.312197	6	-1.26492	0.429099	0.00039721	true	true	wrong	true	wrong	wrong	wrong	wrong		0.719938	0.577792	1.20926	0.335615	0.460849	1.29399	6	-0.55204	0.770199
Q9BR76	CORO1B	Coronin-1B OS=Homo sapiens GN=CORO1B PE=1 SV=1 - [COR1B_HUMAN]		0.356821	0.552698				2	-1.17108	0.446388	0.0838032	true	wrong	wrong	wrong	wrong	wrong	wrong	wrong			0.7179	0.695504				2	-0.501007	0.0323322	0.0145153	true	wrong	wrong	wrong	wrong	wrong	wrong	wrong			0.616336	0.756019				2	-0.550858	0.208387
Q13724	MOGS	Mannosyl-oligosaccharide glucosidase OS=Homo sapiens GN=MOGS PE=1 SV=5 - [MOGS_HUMAN]	0.626341	0.793644	0.644103	0.967286	0.529967		5	-0.521412	0.336002	0.0127922	true	true	wrong	wrong	wrong	wrong	wrong	wrong		0.893467	0.99605	1.03318	0.922524	0.708262		5	-0.147024	0.213171	0.0989426	true	true	wrong	wrong	wrong	wrong	wrong	wrong		0.680643	0.77411	0.465799	0.94941	0.636863		5	-0.550496	0.378651
Q9UBB4	ATXN10	Ataxin-10 OS=Homo sapiens GN=ATXN10 PE=1 SV=1 - [ATX10_HUMAN]	0.648123		0.384429				2	-1.00244	0.532842	0.11444	true	wrong	wrong	wrong	wrong	wrong	wrong	wrong		1.50764		1.899			3.17702	3	1.06173	0.550533	0.0395652	true	true	true	wrong	wrong	wrong	wrong	wrong		1.1384		0.410303				2	-0.549118	1.04103
Q9BQE3	TUBA1C	Tubulin alpha-1C chain OS=Homo sapiens GN=TUBA1C PE=1 SV=1 - [TBA1C_HUMAN]		0.49254	0.334691		0.300017	0.230381	4	-1.61389	0.454999	0.00288093	true	true	wrong	true	wrong	wrong	wrong	wrong			0.678889	0.3305		0.556734	0.277832	4	-1.21217	0.60938	0.0142042	true	true	wrong	wrong	wrong	wrong	wrong	wrong			0.813246	0.708071		0.589161	0.645912	4	-0.547532	0.198359
P30520	ADSS	Adenylosuccinate synthetase isozyme 2 OS=Homo sapiens GN=ADSS PE=1 SV=3 - [PURA2_HUMAN]			1.07168	0.746594	1.32432	0.711952	4	-0.101657	0.428509	0.333783	true	true	wrong	wrong	wrong	wrong	wrong	wrong				2.73345	1.84884	1.18684	2.73347	4	1.0088	0.5732	0.0194601	true	true	true	wrong	wrong	wrong	wrong	wrong				0.51501	0.644593	1.86314	0.358591	4	-0.543181	1.02189
Q96T88	UHRF1	E3 ubiquitin-protein ligase UHRF1 OS=Homo sapiens GN=UHRF1 PE=1 SV=1 - [UHRF1_HUMAN]	0.976212					2.04594	2	0.499016	0.754836	0.260701	true	wrong	wrong	wrong	wrong	wrong	wrong	wrong		2.33425					3.80142	2	1.57475	0.497504	0.0699596	true	wrong	true	wrong	wrong	wrong	wrong	wrong		0.726192					0.650997	2	-0.540427	0.111511
P38646	HSPA9	Stress-70 protein, mitochondrial OS=Homo sapiens GN=HSPA9 PE=1 SV=2 - [GRP75_HUMAN]	0.30108	0.205525	0.252867	0.273031	0.203911	0.233661	6	-2.04372	0.22482	1.69678e-06	true	true	wrong	true	wrong	wrong	wrong	wrong		0.469174	0.374806	0.378598	0.471162	0.408145	0.33724	6	-1.30926	0.192026	7.03114e-06	true	true	wrong	true	wrong	wrong	wrong	wrong		0.803259	0.705056	0.670587	0.700786	0.614316	0.647673	6	-0.539887	0.13233
P30501	HLA-C	HLA class I histocompatibility antigen, Cw-2 alpha chain OS=Homo sapiens GN=HLA-C PE=1 SV=1 - [1C02_HUMAN]	0.560697	0.503746				0.235079	3	-1.30424	0.683812	0.0403471	true	true	wrong	wrong	wrong	wrong	wrong	wrong		0.933462	0.966836	0.903904			0.835505	4	-0.138258	0.0898996	0.0271566	true	true	wrong	wrong	wrong	wrong	wrong	wrong		1.05231	0.913444				0.342846	3	-0.533805	0.881108
P62714	PPP2CB	Serine/threonine-protein phosphatase 2A catalytic subunit beta isoform OS=Homo sapiens GN=PPP2CB PE=1 SV=1 - [PP2AB_HUMAN]					0.423524	0.248337	2	-1.62456	0.544575	0.0740825	true	wrong	wrong	wrong	wrong	wrong	wrong	wrong						0.867774	0.98053	2	-0.116487	0.124622	0.20615	true	wrong	wrong	wrong	wrong	wrong	wrong	wrong						0.91668	0.526126	2	-0.526014	0.566399
Q01518	CAP1	Adenylyl cyclase-associated protein 1 OS=Homo sapiens GN=CAP1 PE=1 SV=5 - [CAP1_HUMAN]	1.24407					0.790342	2	-0.0121888	0.462817	0.48815	true	wrong	wrong	wrong	wrong	wrong	wrong	wrong		0.629351						1	-0.668064	n.a.	n.a.	true	wrong	wrong	wrong	wrong	wrong	wrong	wrong		1.58831					0.303989	2	-0.525205	1.68674
P61619	SEC61A1	Protein transport protein Sec61 subunit alpha isoform 1 OS=Homo sapiens GN=SEC61A1 PE=1 SV=2 - [S61A1_HUMAN]				0.280519		0.256364	2	-1.89878	0.0918585	0.0108845	true	wrong	wrong	wrong	wrong	wrong	wrong	wrong					0.345311		0.438225	2	-1.36214	0.243086	0.039956	true	wrong	wrong	wrong	wrong	wrong	wrong	wrong					0.830356		0.582179	2	-0.524332	0.362228
Q6UB35	MTHFD1L	Monofunctional C1-tetrahydrofolate synthase, mitochondrial OS=Homo sapiens GN=MTHFD1L PE=1 SV=1 - [C1TM_HUMAN]	0.723381	0.785597	0.580033		0.79528	0.612802	5	-0.527615	0.208201	0.00239144	true	true	wrong	true	wrong	wrong	wrong	wrong		0.771392	0.802834	0.905284		1.00424	0.72881	5	-0.257026	0.186563	0.0184548	true	true	wrong	wrong	wrong	wrong	wrong	wrong		0.921232	0.896003	0.539965		0.710092	0.515869	5	-0.522939	0.39308
Q8IYL3	C1orf174	UPF0688 protein C1orf174 OS=Homo sapiens GN=C1orf174 PE=1 SV=2 - [CA174_HUMAN]	0.604773					1.17657	2	-0.245476	0.678905	0.34954	true	wrong	wrong	wrong	wrong	wrong	wrong	wrong		1.34236					1.24286	2	0.369217	0.0785694	0.0475402	true	wrong	wrong	wrong	wrong	wrong	wrong	wrong		0.575902					0.844254	2	-0.520179	0.39022
Q96DI7	SNRNP40	U5 small nuclear ribonucleoprotein 40 kDa protein OS=Homo sapiens GN=SNRNP40 PE=1 SV=1 - [SNR40_HUMAN]		0.707519				1.33303	2	-0.0422264	0.646201	0.470667	true	wrong	wrong	wrong	wrong	wrong	wrong	wrong			2.29497				5.83973	2	1.87219	0.952772	0.109952	true	wrong	true	wrong	wrong	wrong	wrong	wrong			1.09777				0.44839	2	-0.511296	0.91341
P51991	HNRNPA3	Heterogeneous nuclear ribonucleoprotein A3 OS=Homo sapiens GN=HNRNPA3 PE=1 SV=2 - [ROA3_HUMAN]	0.728476	0.397545	0.372874				3	-1.07037	0.533156	0.0368398	true	true	wrong	wrong	wrong	wrong	wrong	wrong		0.673573	0.422902	0.668081				3	-0.797869	0.384333	0.0346954	true	true	wrong	wrong	wrong	wrong	wrong	wrong		1.06215	0.938967	0.428443			0.573131	4	-0.50744	0.612658
P16220	CREB1	Cyclic AMP-responsive element-binding protein 1 OS=Homo sapiens GN=CREB1 PE=1 SV=2 - [CREB1_HUMAN]	0.330409						1	-1.59768	n.a.	n.a.	true	wrong	wrong	wrong	wrong	wrong	wrong	wrong		0.460688						1	-1.11814	n.a.	n.a.	true	wrong	wrong	wrong	wrong	wrong	wrong	wrong		0.704275						1	-0.50579	n.a.
O00488	ZNF593	Zinc finger protein 593 OS=Homo sapiens GN=ZNF593 PE=1 SV=2 - [ZN593_HUMAN]	0.405592	0.770657	0.991873	0.364479	0.761155	0.950111	6	-0.602195	0.623086	0.0320811	true	true	wrong	wrong	wrong	wrong	wrong	wrong		1.06016	1.21154	0.451597	1.13386	1.05832	0.40356	6	-0.305317	0.720165	0.173319	true	true	wrong	wrong	wrong	wrong	wrong	wrong		0.379444	0.641891	1.64174	0.281271	0.696183	1.59704	6	-0.499906	1.04438
O75616	ERAL1	GTPase Era, mitochondrial OS=Homo sapiens GN=ERAL1 PE=1 SV=2 - [ERAL1_HUMAN]	0.426763	0.361298	0.478044	0.34983		0.302437	5	-1.40052	0.257688	0.000131538	true	true	wrong	true	wrong	wrong	wrong	wrong		0.572565	0.566291	0.488399	0.518724	0.424352	0.308426	6	-1.0899	0.336983	0.000257983	true	true	wrong	true	wrong	wrong	wrong	wrong		0.767214	0.656045	0.77233	0.646683		0.703569	5	-0.49985	0.120839
P61313	RPL15	60S ribosomal protein L15 OS=Homo sapiens GN=RPL15 PE=1 SV=2 - [RL15_HUMAN]		0.715669	1.10908	0.435275	0.720786	0.898324	5	-0.432064	0.502223	0.0633655	true	true	wrong	wrong	wrong	wrong	wrong	wrong			1.01505	0.804102	1.06272	1.03321	0.617666	5	-0.170641	0.334254	0.158671	true	true	wrong	wrong	wrong	wrong	wrong	wrong			0.690904	1.03749	0.37404	0.667486	0.992265	5	-0.498694	0.590963
Q07021	C1QBP	Complement component 1 Q subcomponent-binding protein, mitochondrial OS=Homo sapiens GN=C1QBP PE=1 SV=1 - [C1QBP_HUMAN]		0.543048	0.300552		0.617614		3	-1.10346	0.554161	0.0373816	true	true	wrong	wrong	wrong	wrong	wrong	wrong			0.65546	0.580122		0.598292		3	-0.712023	0.0915998	0.00273574	true	true	wrong	true	wrong	wrong	wrong	wrong			0.901938	0.41112		0.958088		3	-0.497679	0.680956
P20618	PSMB1	Proteasome subunit beta type-1 OS=Homo sapiens GN=PSMB1 PE=1 SV=2 - [PSB1_HUMAN]	0.368785	0.383082	0.34547			0.365303	4	-1.45241	0.0615702	1.04833e-05	true	true	wrong	true	wrong	wrong	wrong	wrong		0.790849	0.66539	1.06999			0.97681	4	-0.215625	0.308068	0.128024	true	true	wrong	wrong	wrong	wrong	wrong	wrong		0.911598	1.12589	0.48569			0.511215	4	-0.493088	0.604734
Q96FV9	THOC1	THO complex subunit 1 OS=Homo sapiens GN=THOC1 PE=1 SV=1 - [THOC1_HUMAN]				0.281793		0.414394	2	-1.54911	0.393412	0.0565583	true	wrong	wrong	wrong	wrong	wrong	wrong	wrong					0.450685	0.488491	0.240991	3	-1.41212	0.558009	0.0241546	true	true	wrong	wrong	wrong	wrong	wrong	wrong					0.49643		1.02087	2	-0.490273	0.735483
O75909	CCNK	Cyclin-K OS=Homo sapiens GN=CCNK PE=1 SV=2 - [CCNK_HUMAN]				0.375747	0.276647		2	-1.63302	0.312338	0.0427898	true	wrong	wrong	wrong	wrong	wrong	wrong	wrong					0.477629	0.353651		2	-1.28282	0.306577	0.0532875	true	wrong	wrong	wrong	wrong	wrong	wrong	wrong					0.698097	0.726848		2	-0.489387	0.0411724
Q16891	IMMT	Mitochondrial inner membrane protein OS=Homo sapiens GN=IMMT PE=1 SV=1 - [IMMT_HUMAN]	0.494023		0.359819	0.655666	0.602476	0.48552	5	-0.974879	0.335223	0.00144267	true	true	wrong	true	wrong	wrong	wrong	wrong		0.494104		0.594995	0.597779	0.640186	0.344494	5	-0.937873	0.362754	0.0022235	true	true	wrong	true	wrong	wrong	wrong	wrong		0.822094		0.422421	0.795981	0.750882	0.894005	5	-0.486011	0.432972
Q9Y4W6	AFG3L2	AFG3-like protein 2 OS=Homo sapiens GN=AFG3L2 PE=1 SV=2 - [AFG32_HUMAN]	0.352886	0.380367	0.416533	0.363874			4	-1.40481	0.104153	5.58945e-05	true	true	wrong	true	wrong	wrong	wrong	wrong		0.500392	0.51702	0.417297	0.484767	0.810247		5	-0.911927	0.360072	0.0023967	true	true	wrong	true	wrong	wrong	wrong	wrong		0.706719	0.739122	0.769928	0.64806			4	-0.484978	0.106589
P49448	GLUD2	Glutamate dehydrogenase 2, mitochondrial OS=Homo sapiens GN=GLUD2 PE=1 SV=2 - [DHE4_HUMAN]		0.286054		0.408589	0.469354	0.297795	4	-1.48394	0.34849	0.00170028	true	true	wrong	true	wrong	wrong	wrong	wrong			0.706117		0.536378	0.636357	0.631128	4	-0.679196	0.163839	0.00183792	true	true	wrong	true	wrong	wrong	wrong	wrong			0.73449		0.828534	0.806293	0.533698	4	-0.48327	0.291421
P00367	GLUD1	Glutamate dehydrogenase 1, mitochondrial OS=Homo sapiens GN=GLUD1 PE=1 SV=2 - [DHE3_HUMAN]		0.683547		0.534109	0.61354	0.389278	4	-0.879895	0.352343	0.00771933	true	true	wrong	wrong	wrong	wrong	wrong	wrong			0.706117		0.536378	0.636357	0.562067	4	-0.720995	0.179268	0.00200638	true	true	wrong	true	wrong	wrong	wrong	wrong			0.73449		0.828534	0.806293	0.533698	4	-0.48327	0.291421
Q13257	MAD2L1	Mitotic spindle assembly checkpoint protein MAD2A OS=Homo sapiens GN=MAD2L1 PE=1 SV=1 - [MD2L1_HUMAN]		0.455884		0.858584	0.388846	0.271415	4	-1.14935	0.694137	0.0226692	true	true	wrong	wrong	wrong	wrong	wrong	wrong			0.653358			0.396768	0.28785	3	-1.2481	0.595899	0.0341463	true	true	wrong	wrong	wrong	wrong	wrong	wrong			0.727771			0.736722	0.682863	3	-0.483194	0.0588081
P53618	COPB1	Coatomer subunit beta OS=Homo sapiens GN=COPB1 PE=1 SV=3 - [COPB_HUMAN]		0.213926	0.273273		0.179898	0.23487	4	-2.16531	0.252477	0.000215858	true	true	wrong	true	wrong	wrong	wrong	wrong			0.364532	0.346798		0.434639	0.282847	4	-1.50193	0.254995	0.000657418	true	true	wrong	true	wrong	wrong	wrong	wrong			0.771699	0.795173		0.662071	0.64765	4	-0.481551	0.150875
Q86UK7	ZNF598	Zinc finger protein 598 OS=Homo sapiens GN=ZNF598 PE=1 SV=1 - [ZN598_HUMAN]	0.445202		0.363382				2	-1.31395	0.207163	0.0353409	true	wrong	wrong	wrong	wrong	wrong	wrong	wrong		0.769225		0.685475				2	-0.461673	0.117593	0.0567221	true	wrong	wrong	wrong	wrong	wrong	wrong	wrong		0.886449		0.58342				2	-0.475641	0.42674
P29033	GJB2	Gap junction beta-2 protein OS=Homo sapiens GN=GJB2 PE=1 SV=3 - [CXB2_HUMAN]		4.53371					1	2.18069	n.a.	n.a.	true	wrong	true	wrong	wrong	wrong	wrong	wrong			6.17371					1	2.62614	n.a.	n.a.	true	wrong	true	wrong	wrong	wrong	wrong	wrong			0.720431					1	-0.473068	n.a.
Q9Y5Q8	GTF3C5	General transcription factor 3C polypeptide 5 OS=Homo sapiens GN=GTF3C5 PE=1 SV=2 - [TF3C5_HUMAN]	0.360139	0.342497		0.336826	0.303268	0.381319	5	-1.54028	0.122956	4.83175e-06	true	true	wrong	true	wrong	wrong	wrong	wrong		0.470863	0.498626		0.596476	0.539798	0.339119	5	-1.05714	0.309008	0.000784517	true	true	wrong	true	wrong	wrong	wrong	wrong		0.973442	0.750014		0.556463	0.5786	0.826729	5	-0.472673	0.342859
Q6PGN9	PSRC1	Proline/serine-rich coiled-coil protein 1 OS=Homo sapiens GN=PSRC1 PE=1 SV=1 - [PSRC1_HUMAN]	0.297141	0.353179				0.403354	3	-1.52073	0.221075	0.00348548	true	true	wrong	true	wrong	wrong	wrong	wrong		0.539906	0.586864				0.39407	3	-1.00053	0.303029	0.0146209	true	true	wrong	wrong	wrong	wrong	wrong	wrong		0.608554	0.748521				0.82334	3	-0.471622	0.222962
Q13011	ECH1	Delta(3,5)-Delta(2,4)-dienoyl-CoA isomerase, mitochondrial OS=Homo sapiens GN=ECH1 PE=1 SV=2 - [ECH1_HUMAN]	0.343153	0.307653	0.50798		0.35511	0.474768	5	-1.35785	0.314383	0.000321509	true	true	wrong	true	wrong	wrong	wrong	wrong		0.65126	0.715702	0.362576		0.808858	0.194793	5	-1.04619	0.858569	0.0263652	true	true	wrong	wrong	wrong	wrong	wrong	wrong		0.58154	0.494217	1.13711		0.49562	1.21507	5	-0.469025	0.648927
Q14566	MCM6	DNA replication licensing factor MCM6 OS=Homo sapiens GN=MCM6 PE=1 SV=1 - [MCM6_HUMAN]		1.06088	0.963207		0.947388	0.992163	4	-0.0145375	0.0720109	0.356723	true	true	wrong	wrong	wrong	wrong	wrong	wrong			1.27598	1.66285		1.91704	1.17175	4	0.563203	0.330089	0.0210378	true	true	wrong	wrong	wrong	wrong	wrong	wrong			1.02593	0.545577		0.812582	0.609362	4	-0.462813	0.411928
Q7KZI7	MARK2	Serine/threonine-protein kinase MARK2 OS=Homo sapiens GN=MARK2 PE=1 SV=2 - [MARK2_HUMAN]	0.387868	0.533718	0.615499	0.305462	0.301319	0.384011	6	-1.29912	0.419616	0.000316387	true	true	wrong	true	wrong	wrong	wrong	wrong		0.637557	0.67851	0.484187	0.584707	0.820282	0.395318	6	-0.775706	0.372329	0.00187994	true	true	wrong	true	wrong	wrong	wrong	wrong		0.676322	0.855646	1.10391	0.634346	0.490334	0.7352	6	-0.46252	0.397741
Q01130	SRSF2	Serine/arginine-rich splicing factor 2 OS=Homo sapiens GN=SRSF2 PE=1 SV=4 - [SRSF2_HUMAN]		1.41322	0.597843	1.58682		0.296954	4	-0.33218	1.13586	0.299851	true	true	wrong	wrong	wrong	wrong	wrong	wrong			1.28202	2.67567	2.15169		1.18908	4	0.783409	0.569838	0.0353834	true	true	wrong	wrong	wrong	wrong	wrong	wrong			2.06528	0.320526	1.29078		0.324876	4	-0.462237	1.37856
P17174	GOT1	Aspartate aminotransferase, cytoplasmic OS=Homo sapiens GN=GOT1 PE=1 SV=3 - [AATC_HUMAN]			0.9318	0.779372	1.96117	1.21475	4	0.197712	0.579179	0.271886	true	true	wrong	wrong	wrong	wrong	wrong	wrong				2.46419	1.35534	1.97122	5.59786	4	1.30093	0.865799	0.0287161	true	true	true	wrong	wrong	wrong	wrong	wrong				0.499711	0.810778	1.68521	0.408704	4	-0.46035	0.908995
Q9BZI7	UPF3B	Regulator of nonsense transcripts 3B OS=Homo sapiens GN=UPF3B PE=1 SV=1 - [REN3B_HUMAN]	0.445146	0.655071	0.616686	0.557594	0.563946		5	-0.82888	0.212155	0.00047295	true	true	wrong	true	wrong	wrong	wrong	wrong		0.770627	0.871814	0.621855	0.813644	0.700849	0.505093	6	-0.509148	0.288882	0.00379548	true	true	wrong	true	wrong	wrong	wrong	wrong		0.588651	0.765501	0.774813	0.731552	0.800353		5	-0.458076	0.177503
P84098	RPL19	60S ribosomal protein L19 OS=Homo sapiens GN=RPL19 PE=1 SV=1 - [RL19_HUMAN]	0.368462	0.486591	0.59543	0.299043	0.548289	0.558762	6	-1.11265	0.394003	0.000484128	true	true	wrong	true	wrong	wrong	wrong	wrong		0.646406	0.912993	0.51089		1.06346	0.48792	5	-0.53525	0.499881	0.0374097	true	true	wrong	wrong	wrong	wrong	wrong	wrong		0.636433	0.594672	0.99922		0.581803	0.930476	5	-0.457647	0.374645
O43395	PRPF3	U4/U6 small nuclear ribonucleoprotein Prp3 OS=Homo sapiens GN=PRPF3 PE=1 SV=2 - [PRPF3_HUMAN]						0.560401	1	-0.835469	n.a.	n.a.	true	wrong	wrong	wrong	wrong	wrong	wrong	wrong							0.921627	1	-0.117744	n.a.	n.a.	true	wrong	wrong	wrong	wrong	wrong	wrong	wrong							0.731949	1	-0.450184	n.a.
Q13887	KLF5	Krueppel-like factor 5 OS=Homo sapiens GN=KLF5 PE=1 SV=2 - [KLF5_HUMAN]					0.476714		1	-1.0688	n.a.	n.a.	true	wrong	wrong	wrong	wrong	wrong	wrong	wrong						0.62041		1	-0.688706	n.a.	n.a.	true	wrong	wrong	wrong	wrong	wrong	wrong	wrong						0.733865		1	-0.446413	n.a.
Q15637	SF1	Splicing factor 1 OS=Homo sapiens GN=SF1 PE=1 SV=4 - [SF01_HUMAN]			0.55735	0.580868	0.706038	0.733885	4	-0.643905	0.198685	0.00372706	true	true	wrong	true	wrong	wrong	wrong	wrong				1.2015	1.13862	0.984632	1.09804	4	0.141179	0.121376	0.0512467	true	true	wrong	wrong	wrong	wrong	wrong	wrong				0.571345	0.752374	1.0683	0.635298	4	-0.444306	0.395167
P51659	HSD17B4	Peroxisomal multifunctional enzyme type 2 OS=Homo sapiens GN=HSD17B4 PE=1 SV=3 - [DHB4_HUMAN]		1.03561	0.711242	1.20645			3	-0.0567786	0.392335	0.412738	true	true	wrong	wrong	wrong	wrong	wrong	wrong			2.33749	2.91422	2.54289		4.11498	4	1.53886	0.359442	0.00167385	true	true	true	true	wrong	true	wrong	wrong			0.980587	0.414188	0.980045			3	-0.443002	0.717624
P04181	OAT	Ornithine aminotransferase, mitochondrial OS=Homo sapiens GN=OAT PE=1 SV=1 - [OAT_HUMAN]	1.00403	1.27308	0.739188	1.0057	2.34861	0.592188	6	0.0670437	0.688946	0.410528	true	true	wrong	wrong	wrong	wrong	wrong	wrong		1.04471	1.12676	1.68093	0.97262	1.71563	1.62499	6	0.403944	0.378059	0.0236285	true	true	wrong	wrong	wrong	wrong	wrong	wrong		1.04211	1.22441	0.423142	1.04628	1.03925	0.274099	6	-0.439268	0.890457
Q13404	UBE2V1	Ubiquitin-conjugating enzyme E2 variant 1 OS=Homo sapiens GN=UBE2V1 PE=1 SV=2 - [UB2V1_HUMAN]				1.56758	2.15757	1.59979	3	0.811941	0.258028	0.016027	true	true	wrong	wrong	wrong	wrong	wrong	wrong					0.973935	0.850165	1.47031	3	0.0946114	0.411529	0.364484	true	true	wrong	wrong	wrong	wrong	wrong	wrong				0.494907	0.899439	1.48416	0.454349	4	-0.434039	0.799876
P48729	CSNK1A1	Casein kinase I isoform alpha OS=Homo sapiens GN=CSNK1A1 PE=1 SV=2 - [KC1A_HUMAN]	0.520626	0.775091					2	-0.654621	0.405962	0.131544	true	wrong	wrong	wrong	wrong	wrong	wrong	wrong		0.68222	1.12175					2	-0.192969	0.50731	0.342904	true	wrong	wrong	wrong	wrong	wrong	wrong	wrong		0.779215	0.705258					2	-0.431841	0.101731
Q99848	EBNA1BP2	Probable rRNA-processing protein EBP2 OS=Homo sapiens GN=EBNA1BP2 PE=1 SV=2 - [EBP2_HUMAN]				0.997221	0.0869079		2	-1.76419	2.48927	0.249637	true	wrong	wrong	wrong	wrong	wrong	wrong	wrong					0.887555	0.248369		2	-1.09077	1.2992	0.222806	true	wrong	wrong	wrong	wrong	wrong	wrong	wrong					1.60388	0.344151		2	-0.428659	1.5701
Q9UGN5	PARP2	Poly [ADP-ribose] polymerase 2 OS=Homo sapiens GN=PARP2 PE=1 SV=2 - [PARP2_HUMAN]	0.418507	0.492022		0.436908	0.467224		4	-1.14307	0.103243	0.000100815	true	true	wrong	true	wrong	wrong	wrong	wrong		0.629408	0.757778		0.438884	0.605877		4	-0.744769	0.327452	0.00995171	true	true	wrong	wrong	wrong	wrong	wrong	wrong		0.696262	0.645325		0.923627	0.739508		4	-0.426045	0.222647
Q9Y3U8	RPL36	60S ribosomal protein L36 OS=Homo sapiens GN=RPL36 PE=1 SV=3 - [RL36_HUMAN]		0.497022	0.683098	0.304961	0.43757	0.653516	5	-1.01558	0.473433	0.00433466	true	true	wrong	true	wrong	wrong	wrong	wrong			0.728956	0.489672	0.511921	0.329288	0.530826	5	-0.993696	0.40873	0.00277835	true	true	wrong	true	wrong	wrong	wrong	wrong			0.469076	0.827352	0.551675	1.45231	0.739087	5	-0.424295	0.629237
P42696	RBM34	RNA-binding protein 34 OS=Homo sapiens GN=RBM34 PE=1 SV=2 - [RBM34_HUMAN]	0.765491			0.354441			2	-0.940962	0.785482	0.169733	true	wrong	wrong	wrong	wrong	wrong	wrong	wrong		0.70464			0.590902			2	-0.632026	0.179582	0.063113	true	wrong	wrong	wrong	wrong	wrong	wrong	wrong		1.04019			0.534276			2	-0.423747	0.679665
Q9UNL2	SSR3	Translocon-associated protein subunit gamma OS=Homo sapiens GN=SSR3 PE=1 SV=1 - [SSRG_HUMAN]				0.58692			1	-0.768764	n.a.	n.a.	true	wrong	wrong	wrong	wrong	wrong	wrong	wrong					0.717977			1	-0.47799	n.a.	n.a.	true	wrong	wrong	wrong	wrong	wrong	wrong	wrong					0.748699			1	-0.417543	n.a.
Q9P015	MRPL15	39S ribosomal protein L15, mitochondrial OS=Homo sapiens GN=MRPL15 PE=1 SV=1 - [RM15_HUMAN]	0.579142			0.896655	0.977913		3	-0.32587	0.405089	0.149086	true	true	wrong	wrong	wrong	wrong	wrong	wrong		0.670482			1.25745	0.885899		3	-0.140339	0.454595	0.323171	true	true	wrong	wrong	wrong	wrong	wrong	wrong		0.783447			0.593459	0.903397		3	-0.417147	0.308298
Q9NQT5	EXOSC3	Exosome complex component RRP40 OS=Homo sapiens GN=EXOSC3 PE=1 SV=3 - [EXOS3_HUMAN]	0.437172	0.366909		0.40153	0.383375	0.566143	5	-1.23212	0.248282	0.000187585	true	true	wrong	true	wrong	wrong	wrong	wrong		0.639269	0.681956		0.655478	0.651416	0.305886	5	-0.826884	0.49425	0.0100522	true	true	wrong	wrong	wrong	wrong	wrong	wrong		0.744448	0.584896		0.621176	0.625405	1.40079	5	-0.415466	0.520505
P50897	PPT1	Palmitoyl-protein thioesterase 1 OS=Homo sapiens GN=PPT1 PE=1 SV=1 - [PPT1_HUMAN]	0.688016			0.512732	0.753471	0.430508	4	-0.781869	0.374028	0.0124662	true	true	wrong	wrong	wrong	wrong	wrong	wrong		0.695635			0.716351	0.814476	0.52367	4	-0.558546	0.268647	0.0126461	true	true	wrong	wrong	wrong	wrong	wrong	wrong		0.970529			0.654958	0.885265	0.561618	4	-0.415459	0.368725
Q93008	USP9X	Probable ubiquitin carboxyl-terminal hydrolase FAF-X OS=Homo sapiens GN=USP9X PE=1 SV=3 - [USP9X_HUMAN]						0.656339	1	-0.607487	n.a.	n.a.	true	wrong	wrong	wrong	wrong	wrong	wrong	wrong							0.573596	1	-0.801894	n.a.	n.a.	true	wrong	wrong	wrong	wrong	wrong	wrong	wrong							0.751228	1	-0.412676	n.a.
Q12904	AIMP1	Aminoacyl tRNA synthase complex-interacting multifunctional protein 1 OS=Homo sapiens GN=AIMP1 PE=1 SV=2 - [AIMP1_HUMAN]		0.489388					1	-1.03095	n.a.	n.a.	true	wrong	wrong	wrong	wrong	wrong	wrong	wrong			0.638735					1	-0.646711	n.a.	n.a.	true	wrong	wrong	wrong	wrong	wrong	wrong	wrong			0.751509					1	-0.412137	n.a.
Q9BYE2	TMPRSS13	Transmembrane protease serine 13 OS=Homo sapiens GN=TMPRSS13 PE=2 SV=3 - [TMPSD_HUMAN]				0.554244			1	-0.851406	n.a.	n.a.	true	wrong	wrong	wrong	wrong	wrong	wrong	wrong					0.673934			1	-0.569322	n.a.	n.a.	true	wrong	wrong	wrong	wrong	wrong	wrong	wrong					0.752263			1	-0.410692	n.a.
Q13162	PRDX4	Peroxiredoxin-4 OS=Homo sapiens GN=PRDX4 PE=1 SV=1 - [PRDX4_HUMAN]		0.732168	0.490251	0.901139	0.686468	0.55027	5	-0.606573	0.346425	0.00865853	true	true	wrong	wrong	wrong	wrong	wrong	wrong			0.664842	0.864461	0.6393	0.688796	0.773049	5	-0.47074	0.178032	0.00204859	true	true	wrong	true	wrong	wrong	wrong	wrong			1.11266	0.446914	0.942036	0.983307	0.526934	5	-0.408532	0.591959
O75934	BCAS2	Pre-mRNA-splicing factor SPF27 OS=Homo sapiens GN=BCAS2 PE=1 SV=1 - [SPF27_HUMAN]	0.916955	0.499467	0.560523		0.50638	1.36154	5	-0.499648	0.638348	0.0774883	true	true	wrong	wrong	wrong	wrong	wrong	wrong		1.30423	0.969425	0.758055		0.956161	2.1063	5	0.189762	0.567382	0.248059	true	true	wrong	wrong	wrong	wrong	wrong	wrong		1.00867	0.707313	0.777341		0.708466	0.618343	5	-0.408252	0.262983
P61244	MAX	Protein max OS=Homo sapiens GN=MAX PE=1 SV=1 - [MAX_HUMAN]		0.99013			0.541848	0.430649	3	-0.704588	0.620335	0.0940137	true	true	wrong	wrong	wrong	wrong	wrong	wrong			1.34369			0.925404	0.93783	3	0.0739194	0.305239	0.357824	true	true	wrong	wrong	wrong	wrong	wrong	wrong			1.08943			0.843419	0.470892	3	-0.402878	0.62018
P52907	CAPZA1	F-actin-capping protein subunit alpha-1 OS=Homo sapiens GN=CAPZA1 PE=1 SV=3 - [CAZA1_HUMAN]	0.633923		0.494883	0.553373	0.40434	0.529944	5	-0.949718	0.23828	0.000438081	true	true	wrong	true	wrong	wrong	wrong	wrong		0.831067		0.693988	0.800586	0.742736	0.61825	5	-0.447533	0.170237	0.00209235	true	true	wrong	true	wrong	wrong	wrong	wrong		0.945675		0.67914	0.799103	0.658368	0.738785	5	-0.400432	0.209451
Q96EK4	THAP11	THAP domain-containing protein 11 OS=Homo sapiens GN=THAP11 PE=1 SV=2 - [THA11_HUMAN]	0.522336	0.527919		0.590871	0.550877	0.922445	5	-0.718862	0.343927	0.00474596	true	true	wrong	true	wrong	wrong	wrong	wrong		0.747446	0.963561		0.70515	0.895895	0.383299	5	-0.503913	0.52505	0.0492086	true	true	wrong	wrong	wrong	wrong	wrong	wrong		0.645371	0.538835		0.659777	0.645081	1.70968	5	-0.396511	0.664728
Q14247	CTTN	Src substrate cortactin OS=Homo sapiens GN=CTTN PE=1 SV=2 - [SRC8_HUMAN]	0.488379	0.230186	0.668094		0.107677		4	-1.73754	1.17753	0.0299847	true	true	wrong	wrong	wrong	wrong	wrong	wrong		0.524831	0.352407	0.327943		0.136563		4	-1.7289	0.818617	0.0121318	true	true	wrong	wrong	wrong	wrong	wrong	wrong		0.832025	0.58355	1.39523		0.492844		4	-0.395666	0.663558
Q9ULR0	ISY1	Pre-mRNA-splicing factor ISY1 homolog OS=Homo sapiens GN=ISY1 PE=1 SV=3 - [ISY1_HUMAN]		0.416319					1	-1.26424	n.a.	n.a.	true	wrong	wrong	wrong	wrong	wrong	wrong	wrong			0.535288					1	-0.901614	n.a.	n.a.	true	wrong	wrong	wrong	wrong	wrong	wrong	wrong			0.762015					1	-0.39211	n.a.
P10515	DLAT	Dihydrolipoyllysine-residue acetyltransferase component of pyruvate dehydrogenase complex, mitochondrial OS=Homo sapiens GN=DLAT PE=1 SV=3 - [ODP2_HUMAN]	0.544803	0.405092		0.566063	0.558525		4	-0.960286	0.230069	0.0018019	true	true	wrong	true	wrong	wrong	wrong	wrong		0.592611	0.670359		0.693792	0.867845		4	-0.515938	0.229445	0.0102619	true	true	wrong	wrong	wrong	wrong	wrong	wrong		0.893143	0.617125		0.731489	0.836913		4	-0.391836	0.23581
Q96CT7	CCDC124	Coiled-coil domain-containing protein 124 OS=Homo sapiens GN=CCDC124 PE=1 SV=1 - [CC124_HUMAN]	1.30501	1.0431	1.03545	0.942763	1.10808	0.938964	6	0.0778943	0.175918	0.163802	true	true	wrong	wrong	wrong	wrong	wrong	wrong		1.11545	1.10946	0.69766	1.01472	1.05681	0.777284	6	-0.0791012	0.289296	0.266348	true	true	wrong	wrong	wrong	wrong	wrong	wrong		0.763384	0.785109	0.938858	0.670012	0.693164	0.756064	6	-0.389911	0.170728
Q9Y6V7	DDX49	Probable ATP-dependent RNA helicase DDX49 OS=Homo sapiens GN=DDX49 PE=1 SV=1 - [DDX49_HUMAN]		0.713287				0.818871	2	-0.387869	0.140822	0.0799912	true	wrong	wrong	wrong	wrong	wrong	wrong	wrong			1.36471				0.506223	2	-0.266781	1.01169	0.386379	true	wrong	wrong	wrong	wrong	wrong	wrong	wrong			0.52006				1.12027	2	-0.389705	0.782832
Q9H0S4	DDX47	Probable ATP-dependent RNA helicase DDX47 OS=Homo sapiens GN=DDX47 PE=1 SV=1 - [DDX47_HUMAN]	0.527796	0.602595		0.43235	0.614639	0.891367	5	-0.746103	0.382315	0.00601326	true	true	wrong	wrong	wrong	wrong	wrong	wrong		0.689361	0.853707		0.795601	0.883409	0.463734	5	-0.476444	0.379132	0.0241585	true	true	wrong	wrong	wrong	wrong	wrong	wrong		0.684898	0.624431		0.586186	0.666405	1.58042	5	-0.384243	0.590369
Q8WVD3	RNF138	E3 ubiquitin-protein ligase RNF138 OS=Homo sapiens GN=RNF138 PE=1 SV=1 - [RN138_HUMAN]	0.514635	0.772554	0.917758	0.415582	0.779007	0.972059	6	-0.520409	0.486562	0.0235522	true	true	wrong	wrong	wrong	wrong	wrong	wrong		0.967001	1.29459	0.737216	0.725251	1.46097	0.549498	6	-0.149349	0.54052	0.264284	true	true	wrong	wrong	wrong	wrong	wrong	wrong		0.578299	0.674333	1.08313	0.56418	0.618912	1.38814	6	-0.381364	0.542768
O00255	MEN1	Menin OS=Homo sapiens GN=MEN1 PE=1 SV=4 - [MEN1_HUMAN]	0.502697	0.543037					2	-0.936557	0.0787439	0.018902	true	wrong	wrong	wrong	wrong	wrong	wrong	wrong		0.68003	0.647336					2	-0.591872	0.0502639	0.0190916	true	wrong	wrong	wrong	wrong	wrong	wrong	wrong		0.720878	0.818228					2	-0.380799	0.129222
Q5JVF3	PCID2	PCI domain-containing protein 2 OS=Homo sapiens GN=PCID2 PE=1 SV=2 - [PCID2_HUMAN]	0.446392			0.417617		0.712926	3	-0.970513	0.420473	0.028624	true	true	wrong	wrong	wrong	wrong	wrong	wrong		0.749175			0.482214		0.492335	3	-0.830389	0.358643	0.0284608	true	true	wrong	wrong	wrong	wrong	wrong	wrong		0.582972			0.791384		0.986779	3	-0.378418	0.381297
O00425	IGF2BP3	Insulin-like growth factor 2 mRNA-binding protein 3 OS=Homo sapiens GN=IGF2BP3 PE=1 SV=2 - [IF2B3_HUMAN]	0.924701	0.799256	0.708212	0.92338	0.974476	0.761938	6	-0.24642	0.183933	0.0109573	true	true	wrong	wrong	wrong	wrong	wrong	wrong		0.811644	0.948786	0.978314	0.837465	2.44988	0.658343	6	0.00419445	0.662963	0.494117	true	true	wrong	wrong	wrong	wrong	wrong	wrong		1.17409	0.86774	0.573325	1.0603	0.404425	0.830836	6	-0.377443	0.577797
Q8TAA9	VANGL1	Vang-like protein 1 OS=Homo sapiens GN=VANGL1 PE=1 SV=1 - [VANG1_HUMAN]	0.371568	0.326783	0.515043				3	-1.33304	0.338391	0.0104057	true	true	wrong	wrong	wrong	wrong	wrong	wrong		0.70041	0.666159	0.31708				3	-0.918957	0.640256	0.0654002	true	true	wrong	wrong	wrong	wrong	wrong	wrong		0.595183	0.550299	1.39735				3	-0.375872	0.745684
Q9BRJ6	C7orf50	Uncharacterized protein C7orf50 OS=Homo sapiens GN=C7orf50 PE=1 SV=1 - [CG050_HUMAN]		0.42513					1	-1.23403	n.a.	n.a.	true	wrong	wrong	wrong	wrong	wrong	wrong	wrong			0.541007					1	-0.88628	n.a.	n.a.	true	wrong	wrong	wrong	wrong	wrong	wrong	wrong			0.771077					1	-0.375053	n.a.
P26368	U2AF2	Splicing factor U2AF 65 kDa subunit OS=Homo sapiens GN=U2AF2 PE=1 SV=4 - [U2AF2_HUMAN]				1.05327	1.21302	0.618004	3	-0.113612	0.513113	0.369137	true	true	wrong	wrong	wrong	wrong	wrong	wrong					1.12584	1.00872	1.72025	3	0.322048	0.406658	0.151885	true	true	wrong	wrong	wrong	wrong	wrong	wrong					1.05927	1.42381	0.304057	3	-0.37492	1.18219
P30447	HLA-A	HLA class I histocompatibility antigen, A-23 alpha chain OS=Homo sapiens GN=HLA-A PE=1 SV=1 - [1A23_HUMAN]	0.702641	0.57178				0.291509	3	-1.03133	0.663831	0.0574011	true	true	wrong	wrong	wrong	wrong	wrong	wrong		0.980569	0.967462	0.914181			1.06941	4	-0.0271679	0.0935508	0.30106	true	true	wrong	wrong	wrong	wrong	wrong	wrong		1.28477	1.05897				0.338639	3	-0.372669	1.03954
Q03113	GNA12	Guanine nucleotide-binding protein subunit alpha-12 OS=Homo sapiens GN=GNA12 PE=1 SV=4 - [GNA12_HUMAN]	2.54998		1.35101		2.04777		3	0.939525	0.465483	0.036489	true	true	wrong	wrong	wrong	wrong	wrong	wrong		1.35984		1.45293		3.81784		3	0.971717	0.833654	0.0904779	true	true	wrong	wrong	wrong	wrong	wrong	wrong		1.49925		0.571035		0.41801	0.996089	4	-0.372038	0.821522
Q14839	CHD4	Chromodomain-helicase-DNA-binding protein 4 OS=Homo sapiens GN=CHD4 PE=1 SV=2 - [CHD4_HUMAN]	0.337012		0.46752			0.437095	3	-1.28667	0.249385	0.00614595	true	true	wrong	wrong	wrong	wrong	wrong	wrong		0.834501		0.543776			0.38782	3	-0.83549	0.554041	0.0603133	true	true	wrong	wrong	wrong	wrong	wrong	wrong		0.536385		0.827377			1.04091	3	-0.371397	0.485729
Q9NSD9	FARSB	Phenylalanine--tRNA ligase beta subunit OS=Homo sapiens GN=FARSB PE=1 SV=3 - [SYFB_HUMAN]		1.22861	0.591611		1.02612	0.696544	4	-0.236194	0.487208	0.201886	true	true	wrong	wrong	wrong	wrong	wrong	wrong			2.17176	2.6088		1.71473	2.25525	4	1.11338	0.251007	0.00150995	true	true	true	true	wrong	true	wrong	wrong			1.13736	0.348643		1.23265	0.735992	4	-0.368739	0.834304
P11021	HSPA5	78 kDa glucose-regulated protein OS=Homo sapiens GN=HSPA5 PE=1 SV=2 - [GRP78_HUMAN]	0.640344	0.533484	0.703585	0.592657	0.526776	0.674946	6	-0.717232	0.174594	8.29562e-05	true	true	wrong	true	wrong	wrong	wrong	wrong		0.908277	0.835515	0.699485	0.917093	0.850964	0.560907	6	-0.350925	0.275356	0.0131004	true	true	wrong	wrong	wrong	wrong	wrong	wrong		0.798022	0.716775	0.884503	0.709073	0.653702	0.926641	6	-0.367029	0.197004
Q9BZR9	TRIM8	Probable E3 ubiquitin-protein ligase TRIM8 OS=Homo sapiens GN=TRIM8 PE=2 SV=2 - [TRIM8_HUMAN]				0.278005			1	-1.84682	n.a.	n.a.	true	wrong	wrong	wrong	wrong	wrong	wrong	wrong					0.202561			1	-2.30357	n.a.	n.a.	true	wrong	wrong	wrong	wrong	wrong	wrong	wrong					0.93251	0.647849		2	-0.36354	0.371558
P16930	FAH	Fumarylacetoacetase OS=Homo sapiens GN=FAH PE=1 SV=2 - [FAAA_HUMAN]		0.792466	0.480884				2	-0.695909	0.509585	0.15208	true	wrong	wrong	wrong	wrong	wrong	wrong	wrong			1.80523	2.74923			5.91052	3	1.62483	0.867519	0.0416589	true	true	true	wrong	wrong	wrong	wrong	wrong			1.4062	0.430224				2	-0.362517	1.20819
Q9HC36	RNMTL1	RNA methyltransferase-like protein 1 OS=Homo sapiens GN=RNMTL1 PE=1 SV=2 - [RMTL1_HUMAN]				0.330755		0.476178	2	-1.3333	0.371754	0.0619627	true	wrong	wrong	wrong	wrong	wrong	wrong	wrong					0.711949		0.415796	2	-0.878103	0.548643	0.132422	true	wrong	wrong	wrong	wrong	wrong	wrong	wrong					0.612172		0.989398	2	-0.361684	0.489751
P25705	ATP5A1	ATP synthase subunit alpha, mitochondrial OS=Homo sapiens GN=ATP5A1 PE=1 SV=1 - [ATPA_HUMAN]	0.746199	1.02482	0.596429	0.66448	0.870418	0.706557	6	-0.403937	0.281248	0.0084773	true	true	wrong	wrong	wrong	wrong	wrong	wrong		0.919369	0.946883	0.868138	0.976393	1.0607	0.667325	6	-0.15617	0.230272	0.0787789	true	true	wrong	wrong	wrong	wrong	wrong	wrong		0.824781	1.01149	0.539105	0.719426	0.88619	0.782711	6	-0.359274	0.309381
O15083	ERC2	ERC protein 2 OS=Homo sapiens GN=ERC2 PE=1 SV=3 - [ERC2_HUMAN]	0.472115	0.31917					2	-1.3652	0.399384	0.0649303	true	wrong	wrong	wrong	wrong	wrong	wrong	wrong		0.513267	0.435175					2	-1.08128	0.168373	0.0349079	true	wrong	wrong	wrong	wrong	wrong	wrong	wrong		0.873653	0.696028					2	-0.358825	0.23187
P35269	GTF2F1	General transcription factor IIF subunit 1 OS=Homo sapiens GN=GTF2F1 PE=1 SV=2 - [T2FA_HUMAN]			0.494866	0.582391	0.507005	0.600882	4	-0.877402	0.140517	0.000553364	true	true	wrong	true	wrong	wrong	wrong	wrong				1.25944	1.23443	0.856736	1.05507	4	0.122721	0.257271	0.205227	true	true	wrong	wrong	wrong	wrong	wrong	wrong				0.563175	0.823039	1.07915	0.742062	4	-0.35745	0.38787
P37198	NUP62	Nuclear pore glycoprotein p62 OS=Homo sapiens GN=NUP62 PE=1 SV=3 - [NUP62_HUMAN]	0.384864	0.3806			0.324423		3	-1.46509	0.137895	0.00146993	true	true	wrong	true	wrong	wrong	wrong	wrong		0.400253	0.454752			0.455812		3	-1.19712	0.107312	0.00133391	true	true	wrong	true	wrong	wrong	wrong	wrong		0.911129	0.793968			0.658971		3	-0.356278	0.234599
P13674	P4HA1	Prolyl 4-hydroxylase subunit alpha-1 OS=Homo sapiens GN=P4HA1 PE=1 SV=2 - [P4HA1_HUMAN]	1.13758						1	0.18597	n.a.	n.a.	true	wrong	wrong	wrong	wrong	wrong	wrong	wrong		2.00652					1.28327	2	0.682261	0.455996	0.140531	true	wrong	wrong	wrong	wrong	wrong	wrong	wrong		0.782293						1	-0.354219	n.a.
O75153	KIAA0664	Protein KIAA0664 OS=Homo sapiens GN=KIAA0664 PE=1 SV=2 - [K0664_HUMAN]			1.65638	0.92076			2	0.304465	0.599015	0.301617	true	wrong	wrong	wrong	wrong	wrong	wrong	wrong				2.35544	1.59157			2	0.953224	0.3999	0.0917937	true	wrong	wrong	wrong	wrong	wrong	wrong	wrong				0.716347	0.854321			2	-0.35421	0.17969
O95831	AIFM1	Apoptosis-inducing factor 1, mitochondrial OS=Homo sapiens GN=AIFM1 PE=1 SV=1 - [AIFM1_HUMAN]	0.341448	0.253867	0.232789	0.273306	0.271176	0.285257	6	-1.8658	0.185367	1.02354e-06	true	true	wrong	true	wrong	wrong	wrong	wrong		0.371784	0.322555	0.311365	0.341871	0.37572	0.242136	6	-1.625	0.232775	6.25931e-06	true	true	wrong	true	wrong	wrong	wrong	wrong		0.971751	0.841022	0.580833	0.802899	0.691017	0.880421	6	-0.35143	0.26676
Q9H9B4	SFXN1	Sideroflexin-1 OS=Homo sapiens GN=SFXN1 PE=1 SV=4 - [SFXN1_HUMAN]	0.712273	0.874667	0.678622	0.667739	0.727006	0.806135	6	-0.432587	0.151448	0.000459403	true	true	wrong	true	wrong	wrong	wrong	wrong		0.835459	0.890819	0.789636	0.898374	0.911371	0.820483	6	-0.223475	0.0834987	0.0006188	true	true	wrong	true	wrong	wrong	wrong	wrong		0.898874	0.99365	0.698006	0.683994	0.851171	0.640515	6	-0.350801	0.253676
Q13547	HDAC1	Histone deacetylase 1 OS=Homo sapiens GN=HDAC1 PE=1 SV=1 - [HDAC1_HUMAN]	0.564145	0.422468		0.571407	0.346747	0.939015	5	-0.899036	0.54338	0.0104211	true	true	wrong	wrong	wrong	wrong	true	wrong		0.712973	0.599973		0.821894	0.598832	0.379412	5	-0.729205	0.419803	0.00888974	true	true	wrong	wrong	wrong	wrong	true	wrong		0.762878	0.717505		0.583508	0.565256	1.65992	5	-0.3477	0.631124
Q14739	LBR	Lamin-B receptor OS=Homo sapiens GN=LBR PE=1 SV=2 - [LBR_HUMAN]	0.527932	0.5095		0.484508	0.442399		4	-1.0291	0.110668	0.000169644	true	true	wrong	true	wrong	wrong	wrong	wrong		0.539881	0.574969		0.547364	0.567895		4	-0.843366	0.0429659	1.81828e-05	true	true	wrong	true	wrong	wrong	wrong	wrong		0.863156	0.825571		0.747867	0.718485		4	-0.34624	0.12275
P55265	ADAR	Double-stranded RNA-specific adenosine deaminase OS=Homo sapiens GN=ADAR PE=1 SV=4 - [DSRAD_HUMAN]					0.507668	0.446306	2	-1.07097	0.131417	0.0275501	true	wrong	wrong	wrong	wrong	wrong	true	wrong						0.76458	0.488923	2	-0.709791	0.456126	0.135762	true	wrong	wrong	wrong	wrong	wrong	true	wrong						0.794961	0.780729	2	-0.344075	0.0184292
Q92499	DDX1	ATP-dependent RNA helicase DDX1 OS=Homo sapiens GN=DDX1 PE=1 SV=2 - [DDX1_HUMAN]	1.13307			0.983349	1.46459	1.27699	4	0.264815	0.244981	0.0596796	true	true	wrong	wrong	wrong	wrong	wrong	wrong		1.05993			1.37714	2.13025	0.995195	4	0.40743	0.498857	0.10044	true	true	wrong	wrong	wrong	wrong	wrong	wrong		1.17179			0.648213	0.592328	0.868647	4	-0.338858	0.445839
P46977	STT3A	Dolichyl-diphosphooligosaccharide--protein glycosyltransferase subunit STT3A OS=Homo sapiens GN=STT3A PE=1 SV=2 - [STT3A_HUMAN]				0.492757	0.691698		2	-0.776419	0.345963	0.0971584	true	wrong	wrong	wrong	wrong	wrong	wrong	wrong					0.586521	0.851057		2	-0.501209	0.379768	0.156563	true	wrong	wrong	wrong	wrong	wrong	wrong	wrong					0.788391	0.796778		2	-0.335384	0.0107948
Q8WVX9	FAR1	Fatty acyl-CoA reductase 1 OS=Homo sapiens GN=FAR1 PE=1 SV=1 - [FACR1_HUMAN]	0.447161	0.372957		0.379886	0.361628	0.289861	5	-1.44688	0.223934	6.67092e-05	true	true	wrong	true	wrong	wrong	wrong	wrong		0.599798	0.71098		0.637292	0.671021	0.257741	5	-0.882224	0.607068	0.0156941	true	true	wrong	wrong	wrong	wrong	wrong	wrong		0.851944	0.717458		0.635267	0.663721	1.2304	5	-0.3314	0.387754
Q96CS3	FAF2	FAS-associated factor 2 OS=Homo sapiens GN=FAF2 PE=1 SV=2 - [FAF2_HUMAN]	0.722462	0.569225	0.602944	0.73687	0.722406	0.24368	6	-0.826403	0.613056	0.010715	true	true	wrong	wrong	wrong	wrong	wrong	wrong		0.600942	0.733232	0.577934	0.4185	0.715386	0.58578	6	-0.747477	0.290406	0.00073869	true	true	wrong	true	wrong	wrong	wrong	wrong		1.18508	0.76526	0.789398	1.28985	0.970744	0.283727	6	-0.329205	0.789284
O00178	GTPBP1	GTP-binding protein 1 OS=Homo sapiens GN=GTPBP1 PE=1 SV=3 - [GTPB1_HUMAN]		1.32592	0.303887	1.01587	0.997827		4	-0.322957	0.949006	0.272467	true	true	wrong	wrong	wrong	wrong	wrong	wrong			0.859879	1.39894	0.733089	0.778625		4	-0.135598	0.424045	0.283978	true	true	wrong	wrong	wrong	wrong	wrong	wrong			1.53684	0.165718	1.2883	1.24639		4	-0.322503	1.5196
Q969X6	CIRH1A	Cirhin OS=Homo sapiens GN=CIRH1A PE=1 SV=1 - [CIR1A_HUMAN]	0.502941			0.495759	0.302547		3	-1.24287	0.417469	0.0178055	true	true	wrong	wrong	wrong	wrong	wrong	wrong		0.467885			0.372608	0.450465		3	-1.22352	0.175997	0.00341327	true	true	wrong	true	wrong	wrong	wrong	wrong		0.900654			1.03837	0.548263		3	-0.321232	0.483714
P26373	RPL13	60S ribosomal protein L13 OS=Homo sapiens GN=RPL13 PE=1 SV=4 - [RL13_HUMAN]	0.415388	0.54973	0.701465	0.489624	0.541837	0.792681	6	-0.81529	0.340721	0.00102471	true	true	wrong	true	wrong	wrong	wrong	wrong		0.661697	0.813203	0.430864	0.783314	0.868541	0.365079	6	-0.686359	0.523766	0.0118659	true	true	wrong	wrong	wrong	wrong	wrong	wrong		0.629147	0.657792	1.25526	0.615441	0.599326	1.37331	6	-0.321013	0.556198
Q92974	ARHGEF2	Rho guanine nucleotide exchange factor 2 OS=Homo sapiens GN=ARHGEF2 PE=1 SV=4 - [ARHG2_HUMAN]	0.566616	0.615379	0.725688		0.619645	0.695704	5	-0.639306	0.144484	0.000292832	true	true	wrong	true	wrong	wrong	wrong	wrong		0.792914	0.827117	0.608965		0.875847	0.499854	5	-0.503168	0.343009	0.0152484	true	true	wrong	wrong	wrong	wrong	wrong	wrong		0.723139	0.756003	0.948613		0.701728	0.907354	5	-0.319716	0.198151
O94906	PRPF6	Pre-mRNA-processing factor 6 OS=Homo sapiens GN=PRPF6 PE=1 SV=1 - [PRP6_HUMAN]	0.48068	0.465918	0.600076		0.449436	0.629016	5	-0.943626	0.223792	0.000352753	true	true	wrong	true	wrong	wrong	wrong	wrong		0.61951	0.592353	0.544207		0.629086	0.438372	5	-0.836498	0.213581	0.000468523	true	true	wrong	true	wrong	wrong	wrong	wrong		0.795196	0.817622	0.907175		0.690808	0.811007	5	-0.319503	0.140663
Q9BYG3	MKI67IP	MKI67 FHA domain-interacting nucleolar phosphoprotein OS=Homo sapiens GN=MKI67IP PE=1 SV=1 - [MK67I_HUMAN]	0.311809	0.198599					2	-2.00667	0.460188	0.0511719	true	wrong	wrong	wrong	wrong	wrong	wrong	wrong		0.302121	0.295552					2	-1.74266	0.0224261	0.00289644	true	wrong	wrong	true	wrong	wrong	wrong	wrong		0.992886	0.646812					2	-0.319441	0.437191
O60282	KIF5C	Kinesin heavy chain isoform 5C OS=Homo sapiens GN=KIF5C PE=1 SV=1 - [KIF5C_HUMAN]	0.701122		0.851911			0.922445	3	-0.286651	0.203636	0.0674913	true	true	wrong	wrong	wrong	wrong	wrong	wrong		1.0861		0.77242			0.671561	3	-0.275931	0.356735	0.156136	true	true	wrong	wrong	wrong	wrong	wrong	wrong		0.638187		0.84307			0.957803	3	-0.318807	0.299535
Q12840	KIF5A	Kinesin heavy chain isoform 5A OS=Homo sapiens GN=KIF5A PE=1 SV=2 - [KIF5A_HUMAN]	0.701122		0.851911			0.922445	3	-0.286651	0.203636	0.0674913	true	true	wrong	wrong	wrong	wrong	wrong	wrong		1.0861		0.77242			0.671561	3	-0.275931	0.356735	0.156136	true	true	wrong	wrong	wrong	wrong	wrong	wrong		0.638187		0.84307			0.957803	3	-0.318807	0.299535
Q9BVP2	GNL3	Guanine nucleotide-binding protein-like 3 OS=Homo sapiens GN=GNL3 PE=1 SV=2 - [GNL3_HUMAN]		0.342394		0.484551	0.354862	0.505422	4	-1.26767	0.293726	0.00163519	true	true	wrong	true	wrong	wrong	wrong	wrong			0.593759		0.703052	0.689903	0.341447	4	-0.836538	0.488158	0.0208097	true	true	wrong	wrong	wrong	wrong	wrong	wrong			0.722177		0.716943	0.628912	1.27343	4	-0.317498	0.453509
Q6WCQ1	MPRIP	Myosin phosphatase Rho-interacting protein OS=Homo sapiens GN=MPRIP PE=1 SV=3 - [MPRIP_HUMAN]					0.405757		1	-1.30131	n.a.	n.a.	true	wrong	wrong	wrong	wrong	wrong	wrong	wrong						0.560301	0.230864	2	-1.4753	0.904501	0.13021	true	wrong	wrong	wrong	wrong	wrong	wrong	wrong						0.803102		1	-0.316345	n.a.
P27448	MARK3	MAP/microtubule affinity-regulating kinase 3 OS=Homo sapiens GN=MARK3 PE=1 SV=4 - [MARK3_HUMAN]				0.298862	0.39729	0.637785	3	-1.24101	0.552411	0.0300746	true	true	wrong	wrong	wrong	wrong	wrong	wrong					0.475113	0.557446	0.329501	3	-1.1728	0.388873	0.0173744	true	true	wrong	wrong	wrong	wrong	wrong	wrong					0.575342	0.682625	1.32225	3	-0.315115	0.634016
P26038	MSN	Moesin OS=Homo sapiens GN=MSN PE=1 SV=3 - [MOES_HUMAN]		0.913931		2.46767	0.622553	0.479107	4	-0.143	1.03726	0.400329	true	true	wrong	wrong	wrong	wrong	wrong	wrong		1.67782	1.46882	2.18735	4.12823	1.56946	1.82209	6	0.998636	0.550039	0.0033598	true	true	wrong	true	wrong	wrong	wrong	wrong			1.28051		1.0823	0.796261	0.378551	4	-0.314824	0.778007
P34897	SHMT2	Serine hydroxymethyltransferase, mitochondrial OS=Homo sapiens GN=SHMT2 PE=1 SV=3 - [GLYM_HUMAN]	0.74629	0.811649	0.489034	0.822019	0.731228	0.402139	6	-0.633976	0.432079	0.00782045	true	true	wrong	wrong	wrong	wrong	wrong	wrong		0.71865	0.823235	1.01269	0.596091	0.784195	0.776599	6	-0.366824	0.249826	0.00779927	true	true	wrong	wrong	wrong	wrong	wrong	wrong		1.09061	1.0654	0.389153	0.975155	1.02807	0.599416	6	-0.313298	0.606153
P40938	RFC3	Replication factor C subunit 3 OS=Homo sapiens GN=RFC3 PE=1 SV=2 - [RFC3_HUMAN]	0.436871	0.458225	0.431694				3	-1.1775	0.0455339	0.00024904	true	true	wrong	true	wrong	wrong	wrong	wrong		0.567707	0.563981	0.490669				3	-0.890079	0.118825	0.00294416	true	true	wrong	true	wrong	wrong	wrong	wrong		0.828558	0.875914	0.72543				3	-0.308519	0.13974
P56192	MARS	Methionine--tRNA ligase, cytoplasmic OS=Homo sapiens GN=MARS PE=1 SV=2 - [SYMC_HUMAN]	0.579686	0.565932	0.658328	0.450059	0.498591	0.548241	6	-0.872347	0.188633	4.68756e-05	true	true	wrong	true	wrong	wrong	wrong	wrong		0.684146	0.626552	0.572188	0.609752	0.616372	0.456554	6	-0.761755	0.199088	0.000116542	true	true	wrong	true	wrong	wrong	wrong	wrong		0.87274	0.859783	0.879477	0.670003	0.756543	0.831439	6	-0.3077	0.154315
Q9NPF5	DMAP1	DNA methyltransferase 1-associated protein 1 OS=Homo sapiens GN=DMAP1 PE=1 SV=1 - [DMAP1_HUMAN]	0.694981	0.608831	1.0909	0.639586	0.612492		5	-0.493468	0.354333	0.017865	true	true	wrong	wrong	wrong	wrong	wrong	wrong		1.37047	1.18265	0.554124	1.5228	1.08887		5	0.114904	0.571819	0.338234	true	true	wrong	wrong	wrong	wrong	wrong	wrong		0.671356	0.68219	1.99959	0.519165	0.726833		5	-0.306588	0.753427
Q9BX40	LSM14B	Protein LSM14 homolog B OS=Homo sapiens GN=LSM14B PE=1 SV=1 - [LS14B_HUMAN]					0.8896	0.822946	2	-0.224951	0.0794499	0.0779016	true	wrong	wrong	wrong	wrong	wrong	wrong	wrong						1.33006	0.94375	2	0.163986	0.35003	0.313743	true	wrong	wrong	wrong	wrong	wrong	wrong	wrong						0.838833	0.779551	2	-0.306414	0.0747698
Q8NBS9	TXNDC5	Thioredoxin domain-containing protein 5 OS=Homo sapiens GN=TXNDC5 PE=1 SV=2 - [TXND5_HUMAN]			0.836787	1.12491	1.20812		3	0.0618315	0.280932	0.369865	true	true	wrong	wrong	wrong	wrong	wrong	wrong				3.75402	1.76798	2.56977	6.61905	4	1.7047	0.812919	0.0123626	true	true	true	wrong	wrong	wrong	wrong	wrong				0.426389	1.08781	1.14446		3	-0.304555	0.802085
Q9P2I0	CPSF2	Cleavage and polyadenylation specificity factor subunit 2 OS=Homo sapiens GN=CPSF2 PE=1 SV=2 - [CPSF2_HUMAN]					0.362134	0.548405	2	-1.16605	0.423358	0.0799923	true	wrong	wrong	wrong	wrong	wrong	wrong	wrong						1.02519	0.596954	2	-0.354209	0.551685	0.265337	true	wrong	wrong	wrong	wrong	wrong	wrong	wrong						0.718452	0.912959	2	-0.304207	0.244418
P68366	TUBA4A	Tubulin alpha-4A chain OS=Homo sapiens GN=TUBA4A PE=1 SV=1 - [TBA4A_HUMAN]	0.322668	0.345152		0.237787	0.299292	0.463606	5	-1.61765	0.34911	0.000244904	true	true	wrong	true	wrong	wrong	wrong	wrong		0.412416	0.400524		0.344824	0.411359	0.231236	5	-1.50561	0.355617	0.000347243	true	true	wrong	true	wrong	wrong	wrong	wrong		0.763335	0.810967		0.617895	0.681542	1.34022	5	-0.303423	0.432927
O00299	CLIC1	Chloride intracellular channel protein 1 OS=Homo sapiens GN=CLIC1 PE=1 SV=4 - [CLIC1_HUMAN]			0.762205		0.643122		2	-0.514292	0.173302	0.0744568	true	wrong	wrong	wrong	wrong	wrong	wrong	wrong				2.96962		1.22601		2	0.932126	0.902485	0.191091	true	wrong	wrong	wrong	wrong	wrong	wrong	wrong				0.49687		1.3217		2	-0.30333	0.998053
P11177	PDHB	Pyruvate dehydrogenase E1 component subunit beta, mitochondrial OS=Homo sapiens GN=PDHB PE=1 SV=3 - [ODPB_HUMAN]		0.565732		0.41416	0.523088	0.594953	4	-0.944394	0.231223	0.00191884	true	true	wrong	true	wrong	wrong	wrong	wrong			0.708017		0.652425	0.644287	1.19962	4	-0.371476	0.426989	0.0901197	true	true	wrong	wrong	wrong	wrong	wrong	wrong			0.968206		0.986409	1.11818	0.403918	4	-0.303268	0.676057
Q01968	OCRL	Inositol polyphosphate 5-phosphatase OCRL-1 OS=Homo sapiens GN=OCRL PE=1 SV=3 - [OCRL_HUMAN]					0.143361		1	-2.80227	n.a.	n.a.	true	wrong	wrong	wrong	wrong	wrong	wrong	wrong						0.313564		1	-1.67317	n.a.	n.a.	true	wrong	wrong	wrong	wrong	wrong	wrong	wrong						0.810493		1	-0.303128	n.a.
O00762	UBE2C	Ubiquitin-conjugating enzyme E2 C OS=Homo sapiens GN=UBE2C PE=1 SV=1 - [UBE2C_HUMAN]		2.06531	1.38696				2	0.759144	0.406182	0.115131	true	wrong	wrong	wrong	wrong	wrong	wrong	wrong			3.06118	5.89268				2	2.08651	0.668101	0.0708755	true	wrong	true	wrong	wrong	wrong	wrong	wrong			1.56728	0.419567				2	-0.302382	1.34441
Q96T37	RBM15	Putative RNA-binding protein 15 OS=Homo sapiens GN=RBM15 PE=1 SV=2 - [RBM15_HUMAN]	0.89449				0.873548		2	-0.177952	0.0241679	0.0304749	true	wrong	wrong	wrong	wrong	wrong	wrong	wrong		1.04408				1.20145	0.674421	3	-0.0804223	0.434464	0.389451	true	true	wrong	wrong	wrong	wrong	wrong	wrong		0.914449				0.722943		2	-0.298536	0.239724
Q9ULX6	AKAP8L	A-kinase anchor protein 8-like OS=Homo sapiens GN=AKAP8L PE=1 SV=3 - [AKP8L_HUMAN]	0.602637		0.636622				2	-0.691064	0.0559654	0.018208	true	wrong	wrong	wrong	wrong	wrong	wrong	wrong				0.370451			0.345212	2	-1.48354	0.0719831	0.0109168	true	wrong	wrong	wrong	wrong	wrong	wrong	wrong				0.813985				1	-0.296926	n.a.
P43246	MSH2	DNA mismatch repair protein Msh2 OS=Homo sapiens GN=MSH2 PE=1 SV=1 - [MSH2_HUMAN]	1.07613	1.60389			1.22535	1.01973	4	0.2772	0.291629	0.0767366	true	true	wrong	wrong	wrong	wrong	wrong	wrong		1.31586	1.85423			1.13754	0.931956	4	0.342769	0.418455	0.0999471	true	true	wrong	wrong	wrong	wrong	wrong	wrong		0.874364	0.924822			0.999648	0.554606	4	-0.289354	0.382368
O00268	TAF4	Transcription initiation factor TFIID subunit 4 OS=Homo sapiens GN=TAF4 PE=1 SV=2 - [TAF4_HUMAN]		0.544718					1	-0.876419	n.a.	n.a.	true	wrong	wrong	wrong	wrong	wrong	wrong	wrong			0.474787			0.223374		2	-1.61856	0.769206	0.103193	true	wrong	wrong	wrong	wrong	wrong	wrong	wrong			0.818754					1	-0.288499	n.a.
P05023	ATP1A1	Sodium/potassium-transporting ATPase subunit alpha-1 OS=Homo sapiens GN=ATP1A1 PE=1 SV=1 - [AT1A1_HUMAN]	0.434367	0.484658	0.486562	0.417126	0.381207	0.43664	6	-1.18926	0.133858	1.90089e-06	true	true	wrong	true	wrong	wrong	wrong	wrong		0.563954	0.622219	0.626209	0.502958	0.531176	0.43222	6	-0.883422	0.202704	6.24274e-05	true	true	wrong	true	wrong	wrong	wrong	wrong		0.804344	0.870572	0.725595	0.813745	0.827155	0.883648	6	-0.287737	0.101256
O60884	DNAJA2	DnaJ homolog subfamily A member 2 OS=Homo sapiens GN=DNAJA2 PE=1 SV=1 - [DNJA2_HUMAN]		0.488492				0.46976	2	-1.0618	0.03989	0.00845385	true	wrong	wrong	wrong	wrong	wrong	wrong	wrong			0.707077				0.451169	2	-0.82416	0.458346	0.119262	true	wrong	wrong	wrong	wrong	wrong	wrong	wrong			0.814437				0.826831	2	-0.28523	0.0154071
Q7Z2T5	TRMT1L	TRMT1-like protein OS=Homo sapiens GN=TRMT1L PE=1 SV=2 - [TRM1L_HUMAN]	0.678682	0.704228	0.716398		0.451866		4	-0.673069	0.316985	0.0119603	true	true	wrong	wrong	wrong	wrong	wrong	wrong		0.9259	0.940161	0.608368		0.769309		4	-0.323861	0.293227	0.0571072	true	true	wrong	wrong	wrong	wrong	wrong	wrong		0.824252	0.842067	1.01702		0.644086		4	-0.28429	0.270416
O00203	AP3B1	AP-3 complex subunit beta-1 OS=Homo sapiens GN=AP3B1 PE=1 SV=3 - [AP3B1_HUMAN]					0.286559	0.445275	2	-1.48516	0.449623	0.0671279	true	wrong	wrong	wrong	wrong	wrong	wrong	wrong						0.491554	0.455417	2	-1.07966	0.0778975	0.0162254	true	wrong	wrong	wrong	wrong	wrong	wrong	wrong						0.750528	0.900291	2	-0.28278	0.185605
Q9Y2J2	EPB41L3	Band 4.1-like protein 3 OS=Homo sapiens GN=EPB41L3 PE=1 SV=2 - [E41L3_HUMAN]	0.456587	0.340343	0.60826		0.250313	0.569006	5	-1.24298	0.534103	0.00324952	true	true	wrong	true	wrong	wrong	wrong	wrong		0.678581	0.490731	0.26439		0.747259	0.512948	5	-0.977819	0.586263	0.0101528	true	true	wrong	wrong	wrong	wrong	wrong	wrong		0.662044	0.622713	1.72556		0.385869	1.38311	5	-0.279439	0.888309
Q14657	LAGE3	L antigen family member 3 OS=Homo sapiens GN=LAGE3 PE=1 SV=2 - [LAGE3_HUMAN]	0.287889						1	-1.79641	n.a.	n.a.	true	wrong	wrong	wrong	wrong	wrong	wrong	wrong		0.342618						1	-1.54533	n.a.	n.a.	true	wrong	wrong	wrong	wrong	wrong	wrong	wrong		0.824859						1	-0.277781	n.a.
P42704	LRPPRC	Leucine-rich PPR motif-containing protein, mitochondrial OS=Homo sapiens GN=LRPPRC PE=1 SV=3 - [LPPRC_HUMAN]	0.695368	0.750542	0.674662		0.668139	0.566934	5	-0.581287	0.148174	0.000465568	true	true	wrong	true	wrong	wrong	wrong	wrong		0.641262	0.653699	0.73797		0.609612	0.657747	5	-0.602223	0.101222	9.22725e-05	true	true	wrong	true	wrong	wrong	wrong	wrong		1.02345	1.16728	0.670821		0.897151	0.532755	5	-0.276891	0.460748
O95573	ACSL3	Long-chain-fatty-acid--CoA ligase 3 OS=Homo sapiens GN=ACSL3 PE=1 SV=3 - [ACSL3_HUMAN]	0.618326	0.580266	0.486925	0.558065	0.657225	0.402135	6	-0.879714	0.25852	0.000203196	true	true	wrong	true	wrong	wrong	wrong	wrong		0.668597	0.62536	0.701537	0.520233	0.605677	0.769749	6	-0.635522	0.194327	0.000244909	true	true	wrong	true	wrong	wrong	wrong	wrong		1.01929	1.02361	0.587395	1.10324	1.16771	0.401156	6	-0.276452	0.622763
Q9ULV4	CORO1C	Coronin-1C OS=Homo sapiens GN=CORO1C PE=1 SV=1 - [COR1C_HUMAN]					1.56957		1	0.650365	n.a.	n.a.	true	wrong	wrong	wrong	wrong	wrong	wrong	wrong						1.81967		1	0.863679	n.a.	n.a.	true	wrong	wrong	wrong	wrong	wrong	wrong	wrong						0.826874		1	-0.27426	n.a.
O00264	PGRMC1	Membrane-associated progesterone receptor component 1 OS=Homo sapiens GN=PGRMC1 PE=1 SV=3 - [PGRC1_HUMAN]	0.502941	1.08486	0.465707		1.59945	0.719368	5	-0.354831	0.752972	0.175725	true	true	wrong	wrong	wrong	wrong	wrong	wrong		0.650393	1.25432	1.81216		1.71411	3.18653	5	0.602686	0.838377	0.0916174	true	true	wrong	wrong	wrong	wrong	wrong	wrong		1.46317	1.63638	0.370421		1.72234	0.254091	5	-0.273072	1.32367
Q8IZL8	PELP1	Proline-, glutamic acid- and leucine-rich protein 1 OS=Homo sapiens GN=PELP1 PE=1 SV=2 - [PELP1_HUMAN]				1.19132			1	0.252564	n.a.	n.a.	true	wrong	wrong	wrong	wrong	wrong	wrong	wrong					1.31744			1	0.397742	n.a.	n.a.	true	wrong	wrong	wrong	wrong	wrong	wrong	wrong					0.827809			1	-0.27263	n.a.
Q5T6F2	UBAP2	Ubiquitin-associated protein 2 OS=Homo sapiens GN=UBAP2 PE=1 SV=1 - [UBAP2_HUMAN]			0.341653			0.256579	2	-1.75596	0.292127	0.0372735	true	wrong	wrong	wrong	wrong	wrong	wrong	wrong				0.249828			0.280831	2	-1.91661	0.119336	0.0140053	true	wrong	wrong	wrong	wrong	wrong	wrong	wrong				1.06477			0.644266	2	-0.271864	0.512521
P41252	IARS	Isoleucine--tRNA ligase, cytoplasmic OS=Homo sapiens GN=IARS PE=1 SV=2 - [SYIC_HUMAN]	0.5268	0.458937	0.728758	0.561749	0.46368	0.620995	6	-0.85549	0.256468	0.0002232	true	true	wrong	true	wrong	wrong	wrong	wrong		0.618464	0.627067	0.516235	0.656436	0.655184	0.426828	6	-0.794337	0.248029	0.000270144	true	true	wrong	true	wrong	wrong	wrong	wrong		0.862125	0.781175	1.0374	0.733763	0.637995	0.990229	6	-0.271083	0.266346
Q9NVH2	INTS7	Integrator complex subunit 7 OS=Homo sapiens GN=INTS7 PE=1 SV=1 - [INT7_HUMAN]		0.753404	0.669934				2	-0.493206	0.119787	0.0541379	true	wrong	wrong	wrong	wrong	wrong	wrong	wrong			1.05106	0.892318				2	-0.0462646	0.167025	0.381158	true	wrong	wrong	wrong	wrong	wrong	wrong	wrong			0.928834	0.744733				2	-0.265856	0.225353
Q9BTD8	RBM42	RNA-binding protein 42 OS=Homo sapiens GN=RBM42 PE=1 SV=1 - [RBM42_HUMAN]		0.923936			0.793944		2	-0.223513	0.154683	0.144861	true	wrong	wrong	wrong	wrong	wrong	wrong	wrong			0.890628			0.682184		2	-0.359436	0.271998	0.156394	true	wrong	wrong	wrong	wrong	wrong	wrong	wrong			0.904532			0.766761		2	-0.263954	0.16857
P04843	RPN1	Dolichyl-diphosphooligosaccharide--protein glycosyltransferase subunit 1 OS=Homo sapiens GN=RPN1 PE=1 SV=1 - [RPN1_HUMAN]	0.647985	0.644352	0.664092	0.626831	0.671111	0.552131	6	-0.659456	0.102744	9.46478e-06	true	true	wrong	true	wrong	wrong	wrong	wrong		0.861174	0.827569	0.956662	0.818498	0.812562	0.77294	6	-0.252094	0.104933	0.00100662	true	true	wrong	true	wrong	wrong	wrong	wrong		0.901933	1.01692	0.699962	0.853657	1.02803	0.592753	6	-0.263707	0.314115
P49674	CSNK1E	Casein kinase I isoform epsilon OS=Homo sapiens GN=CSNK1E PE=1 SV=1 - [KC1E_HUMAN]	0.35448	0.527696	0.5844	0.282778		0.678126	5	-1.11521	0.525819	0.00451033	true	true	wrong	true	wrong	wrong	wrong	wrong		0.745293	0.860928	0.530368	0.329512		0.521808	5	-0.819019	0.537451	0.0135444	true	true	wrong	wrong	wrong	wrong	wrong	wrong		0.593386	0.711672	0.982068	0.928707		1.05042	5	-0.261104	0.347841
Q6P1N0	CC2D1A	Coiled-coil and C2 domain-containing protein 1A OS=Homo sapiens GN=CC2D1A PE=1 SV=1 - [C2D1A_HUMAN]	0.463109	0.690935	0.585435		0.555043	0.297428	5	-1.00302	0.465295	0.00426088	true	true	wrong	true	wrong	wrong	wrong	wrong		0.597099	0.88766	0.606594		0.810594	0.51438	5	-0.579824	0.329324	0.00850179	true	true	wrong	wrong	wrong	wrong	wrong	wrong		0.860581	1.1236	0.827637		0.897151	0.565132	5	-0.260267	0.358256
Q5J8M3	TMEM85	Transmembrane protein 85 OS=Homo sapiens GN=TMEM85 PE=1 SV=2 - [TMM85_HUMAN]				2.25201			1	1.17121	n.a.	n.a.	true	wrong	true	wrong	wrong	wrong	wrong	wrong					2.46556			1	1.30192	n.a.	n.a.	true	wrong	true	wrong	wrong	wrong	wrong	wrong					0.835312			1	-0.259613	n.a.
Q12824	SMARCB1	SWI/SNF-related matrix-associated actin-dependent regulator of chromatin subfamily B member 1 OS=Homo sapiens GN=SMARCB1 PE=1 SV=2 - [SNF5_HUMAN]		0.495744			0.7976	0.661383	3	-0.645013	0.345605	0.0419194	true	true	wrong	wrong	wrong	wrong	true	wrong			0.858518			0.679725	0.485975	3	-0.606034	0.412677	0.063002	true	true	wrong	wrong	wrong	wrong	true	wrong			0.565764			1.12257	0.927648	3	-0.254424	0.510199
Q9UHR4	BAIAP2L1	Brain-specific angiogenesis inhibitor 1-associated protein 2-like protein 1 OS=Homo sapiens GN=BAIAP2L1 PE=1 SV=2 - [BI2L1_HUMAN]	0.554097	0.655071	0.576174				3	-0.752496	0.126349	0.00463355	true	true	wrong	true	wrong	wrong	wrong	wrong		0.677668	0.682045	0.699063				3	-0.543305	0.02367	0.000316043	true	true	wrong	true	wrong	wrong	wrong	wrong		0.86696	1.01679	0.669515				3	-0.253585	0.304226
P57740	NUP107	Nuclear pore complex protein Nup107 OS=Homo sapiens GN=NUP107 PE=1 SV=1 - [NU107_HUMAN]		0.638684			0.627767	0.768059	3	-0.566412	0.161302	0.012992	true	true	wrong	wrong	wrong	wrong	wrong	wrong			0.7763			0.746164	0.552243	3	-0.548124	0.268691	0.0358013	true	true	wrong	wrong	wrong	wrong	wrong	wrong			0.806313			0.775458	0.950369	3	-0.250302	0.155732
Q9Y5J1	UTP18	U3 small nucleolar RNA-associated protein 18 homolog OS=Homo sapiens GN=UTP18 PE=1 SV=3 - [UTP18_HUMAN]	0.585792	0.595032	0.712411	0.477001	0.604983	0.660178	6	-0.733626	0.195626	0.000128243	true	true	wrong	true	wrong	wrong	wrong	wrong		0.661951	0.806176	0.379886	0.778133	0.916486	0.36559	6	-0.706972	0.575519	0.0148954	true	true	wrong	wrong	wrong	wrong	wrong	wrong		0.749619	0.734907	1.42084	0.56572	0.621287	1.29037	6	-0.249019	0.554482
Q6P1K2	PMF1	Polyamine-modulated factor 1 OS=Homo sapiens GN=PMF1 PE=1 SV=2 - [PMF1_HUMAN]							0	n.a.	n.a.	n.a.	true	wrong	wrong	wrong	wrong	wrong	wrong	wrong								0	n.a.	n.a.	n.a.	true	wrong	wrong	wrong	wrong	wrong	wrong	wrong						0.841908		1	-0.248266	n.a.
Q86WX3	RPS19BP1	Active regulator of SIRT1 OS=Homo sapiens GN=RPS19BP1 PE=1 SV=1 - [AROS_HUMAN]	0.938565	1.04253	1.29284	0.775235	0.860216		5	-0.0490729	0.282547	0.358767	true	true	wrong	wrong	wrong	wrong	wrong	wrong		1.14832	1.23856	0.612492	1.27327	1.32643		5	0.111407	0.463892	0.30987	true	true	wrong	wrong	wrong	wrong	wrong	wrong		0.827118	0.851863	1.63867	0.574935	0.640547		5	-0.246754	0.58787
Q8WXI9	GATAD2B	Transcriptional repressor p66-beta OS=Homo sapiens GN=GATAD2B PE=1 SV=1 - [P66B_HUMAN]	0.442825	0.347816	0.883903	0.407551	0.336627	0.732545	6	-1.03193	0.581503	0.00369057	true	true	wrong	true	wrong	wrong	wrong	wrong		0.475494	0.428369	0.357754	0.45608	0.496143	0.329733	6	-1.25383	0.236713	2.42417e-05	true	true	wrong	true	wrong	wrong	wrong	wrong		0.748838	0.652554	1.52645	0.670247	0.597733	1.24493	6	-0.237755	0.560502
Q9Y5Q9	GTF3C3	General transcription factor 3C polypeptide 3 OS=Homo sapiens GN=GTF3C3 PE=1 SV=1 - [TF3C3_HUMAN]		0.390408	0.531477		0.371064		3	-1.23304	0.280505	0.00840832	true	true	wrong	wrong	wrong	wrong	wrong	wrong			0.438492	0.373687		0.541745		3	-1.1646	0.26875	0.008646	true	true	wrong	wrong	wrong	wrong	wrong	wrong			0.831016	1.08633		0.675843		3	-0.237609	0.3433
P28070	PSMB4	Proteasome subunit beta type-4 OS=Homo sapiens GN=PSMB4 PE=1 SV=4 - [PSB4_HUMAN]					0.3333	0.369997	2	-1.50976	0.106555	0.0158724	true	wrong	wrong	wrong	wrong	wrong	wrong	wrong						0.519206	0.621883	2	-0.815452	0.184086	0.0503858	true	wrong	wrong	wrong	wrong	wrong	wrong	wrong						1.04624	0.689326	2	-0.235765	0.425645
P52630	STAT2	Signal transducer and activator of transcription 2 OS=Homo sapiens GN=STAT2 PE=1 SV=1 - [STAT2_HUMAN]	11.2694		12.4732		6.94513	11.2128	4	3.35454	0.379033	0.000196568	true	true	true	true	wrong	true	true	true		12.0321		7.34436		13.8352	6.31761	4	3.22877	0.545623	0.000648434	true	true	true	true	wrong	true	true	true		0.824542		1.27305		0.457157	1.08607	4	-0.23504	0.649917
Q9P016	THYN1	Thymocyte nuclear protein 1 OS=Homo sapiens GN=THYN1 PE=1 SV=1 - [THYN1_HUMAN]					0.442769	0.618576	2	-0.934177	0.341107	0.0804292	true	wrong	wrong	wrong	wrong	wrong	wrong	wrong						0.769688	0.711079	2	-0.434787	0.0807972	0.0415886	true	wrong	wrong	wrong	wrong	wrong	wrong	wrong						0.777835	0.929436	2	-0.234019	0.18165
Q86YP4	GATAD2A	Transcriptional repressor p66-alpha OS=Homo sapiens GN=GATAD2A PE=1 SV=1 - [P66A_HUMAN]	0.594648	0.475042	1.4519	0.638643	0.348852	1.30921	6	-0.510561	0.814714	0.0926832	true	true	wrong	wrong	wrong	wrong	wrong	wrong		0.541737	0.529971	0.533682		0.523027	0.655634	5	-0.850076	0.13598	7.59588e-05	true	true	wrong	true	wrong	wrong	wrong	wrong		0.672836	0.550299	1.28018		0.635387	1.47569	5	-0.233989	0.645337
Q96HE9	PRR11	Proline-rich protein 11 OS=Homo sapiens GN=PRR11 PE=1 SV=1 - [PRR11_HUMAN]	0.88437	0.927001	0.957373	1.21392	0.821811	0.581613	6	-0.189133	0.347103	0.11976	true	true	wrong	wrong	wrong	wrong	wrong	wrong		0.690225	0.82561	0.509601	0.543442	0.897656	0.528668	6	-0.62317	0.352775	0.00376042	true	true	wrong	true	wrong	wrong	wrong	wrong		0.971092	0.65174	1.05119	1.21994	0.739629	0.634198	6	-0.232207	0.391959
Q9BRP1	PDCD2L	Programmed cell death protein 2-like OS=Homo sapiens GN=PDCD2L PE=1 SV=1 - [PDD2L_HUMAN]	0.364624	0.472507	0.81974	0.343724		0.768292	5	-0.948965	0.588693	0.0113335	true	true	wrong	wrong	wrong	wrong	wrong	wrong		0.709477	0.937309	0.505841	0.48276		0.352108	5	-0.82567	0.543968	0.0137137	true	true	wrong	wrong	wrong	wrong	wrong	wrong		0.573647	0.678592	1.32039	0.77757		1.12584	5	-0.230426	0.502994
P35520	CBS	Cystathionine beta-synthase OS=Homo sapiens GN=CBS PE=1 SV=2 - [CBS_HUMAN]	0.781941	0.823007		0.578663	0.898058	0.435751	5	-0.555728	0.431238	0.0224708	true	true	wrong	wrong	wrong	wrong	wrong	wrong		0.692097	0.540359		0.701028	0.897877	0.923761	5	-0.440248	0.316716	0.0179668	true	true	wrong	wrong	wrong	wrong	wrong	wrong		1.18478	1.35603		0.864369	0.995581	0.327968	5	-0.228206	0.809883
P27708	CAD	CAD protein OS=Homo sapiens GN=CAD PE=1 SV=3 - [PYR1_HUMAN]	0.199926	0.165772	0.263336	0.206716	0.169593	0.338279	6	-2.20634	0.396099	1.89615e-05	true	true	wrong	true	wrong	wrong	wrong	wrong		0.291128	0.233914	0.240595	0.291887	0.255589	0.152482	6	-2.06491	0.344966	1.33312e-05	true	true	wrong	true	wrong	wrong	wrong	wrong		0.822185	0.801797	0.929188	0.647933	0.649127	1.55332	6	-0.220211	0.466034
P83731	RPL24	60S ribosomal protein L24 OS=Homo sapiens GN=RPL24 PE=1 SV=1 - [RL24_HUMAN]	0.633345	0.653697	1.07207	0.607701	0.560894	0.922228	6	-0.473569	0.374351	0.0134463	true	true	wrong	wrong	wrong	wrong	wrong	wrong		0.715999	0.939851	0.574647	0.692394	0.803989	0.49256	6	-0.539573	0.333565	0.00535919	true	true	wrong	wrong	wrong	wrong	wrong	wrong		0.846345	0.707312	1.29279	0.685471	0.646403	1.19303	6	-0.214912	0.430254
Q13330	MTA1	Metastasis-associated protein MTA1 OS=Homo sapiens GN=MTA1 PE=1 SV=2 - [MTA1_HUMAN]		0.554996		0.524979	0.470637	1.04936	4	-0.699231	0.521931	0.0375436	true	true	wrong	wrong	wrong	wrong	wrong	wrong			0.716751		0.546245	0.603503	0.359794	4	-0.88904	0.422704	0.0122661	true	true	wrong	wrong	wrong	wrong	wrong	wrong			0.655092		0.759854	0.644189	1.72044	4	-0.214525	0.673435
Q7L576	CYFIP1	Cytoplasmic FMR1-interacting protein 1 OS=Homo sapiens GN=CYFIP1 PE=1 SV=1 - [CYFP1_HUMAN]	0.741419	0.731183			0.661588	0.686532	4	-0.505483	0.077279	0.000482343	true	true	wrong	true	wrong	wrong	wrong	wrong		0.732811	0.861826			0.794817	0.593602	4	-0.436689	0.231152	0.0162397	true	true	wrong	wrong	wrong	wrong	wrong	wrong		1.01167	0.848948			0.811486	0.807575	4	-0.207303	0.152844
Q9UEY8	ADD3	Gamma-adducin OS=Homo sapiens GN=ADD3 PE=1 SV=1 - [ADDG_HUMAN]		0.413402					1	-1.27438	n.a.	n.a.	true	wrong	wrong	wrong	wrong	wrong	wrong	wrong			0.467242					1	-1.09776	n.a.	n.a.	true	wrong	wrong	wrong	wrong	wrong	wrong	wrong			0.866254					1	-0.207138	n.a.
P55060	CSE1L	Exportin-2 OS=Homo sapiens GN=CSE1L PE=1 SV=3 - [XPO2_HUMAN]	0.757219	0.927011	0.708486		0.682782	0.766178	5	-0.3885	0.170416	0.00349719	true	true	wrong	true	wrong	wrong	true	wrong		0.530794	0.545337	0.769149		0.516692	0.616657	5	-0.763461	0.236217	0.000972254	true	true	wrong	true	wrong	wrong	true	wrong		1.18899	1.35323	0.63915		0.87392	0.554862	5	-0.200772	0.554133
P68371	TUBB4B	Tubulin beta-4B chain OS=Homo sapiens GN=TUBB4B PE=1 SV=1 - [TBB4B_HUMAN]	0.436549	0.457316	0.569445	0.330419	0.35338	0.478181	6	-1.2166	0.290044	7.50549e-05	true	true	wrong	true	wrong	wrong	wrong	wrong		0.587497	0.565751	0.420811	0.569835	0.576429	0.325606	6	-1.01047	0.348632	0.000429495	true	true	wrong	true	wrong	wrong	wrong	wrong		0.836153	0.90876	1.16839	0.605838	0.722089	1.11861	6	-0.200452	0.364572
P61513	RPL37A	60S ribosomal protein L37a OS=Homo sapiens GN=RPL37A PE=1 SV=2 - [RL37A_HUMAN]				1.09687			1	0.133386	n.a.	n.a.	true	wrong	wrong	wrong	wrong	wrong	wrong	wrong					2.28645		2.34815	2	1.21232	0.0271634	0.00504274	true	wrong	true	wrong	wrong	wrong	wrong	wrong					0.870772			1	-0.199632	n.a.
P35250	RFC2	Replication factor C subunit 2 OS=Homo sapiens GN=RFC2 PE=1 SV=3 - [RFC2_HUMAN]	0.492893	0.492561	0.529544		0.522848	0.31248	5	-1.11463	0.318635	0.000720997	true	true	wrong	true	wrong	wrong	wrong	wrong		0.539906	0.497191	0.558254		0.5087	0.386002	5	-1.01736	0.209821	0.000205325	true	true	wrong	true	wrong	wrong	wrong	wrong		0.984179	0.990863	0.783209		1.08001	0.60792	5	-0.199156	0.337116
O00410	IPO5	Importin-5 OS=Homo sapiens GN=IPO5 PE=1 SV=4 - [IPO5_HUMAN]	0.845742		0.632997		0.974975	0.471424	4	-0.505726	0.46511	0.0589697	true	true	wrong	wrong	wrong	wrong	wrong	wrong		1.29268		1.76959		1.24244	1.70228	4	0.568607	0.263956	0.0115106	true	true	wrong	wrong	wrong	wrong	wrong	wrong		1.29719		0.720005		1.57155	0.394079	4	-0.197448	0.901806
Q86U42	PABPN1	Polyadenylate-binding protein 2 OS=Homo sapiens GN=PABPN1 PE=1 SV=3 - [PABP2_HUMAN]	1.11606	1.12982		1.05799	1.03641	0.840702	5	0.0434185	0.172206	0.301505	true	true	wrong	wrong	wrong	wrong	wrong	wrong		1.49872	1.46085		2.40189	1.22136	1.30882	5	0.614295	0.382448	0.0114644	true	true	wrong	wrong	wrong	wrong	wrong	wrong		0.959069	0.996346		0.86372	1.0666	0.574474	5	-0.196721	0.354611
P23258	TUBG1	Tubulin gamma-1 chain OS=Homo sapiens GN=TUBG1 PE=1 SV=2 - [TBG1_HUMAN]	0.720471	0.94991		0.656065	0.88091	0.913752	5	-0.293654	0.233569	0.0241267	true	true	wrong	wrong	wrong	wrong	wrong	wrong		0.83558	0.926527		0.929743	1.01755	0.518122	5	-0.279576	0.387315	0.0909064	true	true	wrong	wrong	wrong	wrong	wrong	wrong		0.856843	1.01981		0.617387	0.842033	1.11363	5	-0.196626	0.326682
Q9BXW7	CECR5	Cat eye syndrome critical region protein 5 OS=Homo sapiens GN=CECR5 PE=1 SV=1 - [CECR5_HUMAN]				2.55075			1	1.35092	n.a.	n.a.	true	wrong	true	wrong	wrong	wrong	wrong	wrong					2.67102			1	1.41739	n.a.	n.a.	true	wrong	true	wrong	wrong	wrong	wrong	wrong					0.873334			1	-0.195395	n.a.
Q9HDC9	APMAP	Adipocyte plasma membrane-associated protein OS=Homo sapiens GN=APMAP PE=1 SV=2 - [APMAP_HUMAN]	1.37582			1.61847		0.28586	3	-0.217232	1.38143	0.405441	true	true	wrong	wrong	wrong	wrong	wrong	wrong		0.728781			0.828453		1.32121	3	-0.108698	0.451718	0.358654	true	true	wrong	wrong	wrong	wrong	wrong	wrong		2.06574			1.99417		0.163462	3	-0.190175	2.09836
Q8WUM0	NUP133	Nuclear pore complex protein Nup133 OS=Homo sapiens GN=NUP133 PE=1 SV=2 - [NU133_HUMAN]	0.51299	0.441459	0.534875		0.361628	0.434792	5	-1.14288	0.223695	0.000167472	true	true	wrong	true	wrong	wrong	wrong	wrong		0.773078	0.656942	0.52796		0.532008	0.283856	5	-0.925245	0.548566	0.00978962	true	true	wrong	wrong	wrong	wrong	wrong	wrong		0.839077	0.933604	1.01254		0.69904	0.937938	5	-0.188651	0.207149
Q9NVI7	ATAD3A	ATPase family AAA domain-containing protein 3A OS=Homo sapiens GN=ATAD3A PE=1 SV=2 - [ATD3A_HUMAN]	0.638802	0.655442	0.706005	0.657673	0.663964	0.419489	6	-0.701158	0.274706	0.000767218	true	true	wrong	true	wrong	wrong	wrong	wrong		0.766423	0.87292	0.56151	0.688844	0.73015	0.460498	6	-0.587117	0.333877	0.00383078	true	true	wrong	true	wrong	wrong	wrong	wrong		0.818077	0.76627	0.965255	1.07278	0.750637	0.949267	6	-0.185392	0.20735
Q8WWY3	PRPF31	U4/U6 small nuclear ribonucleoprotein Prp31 OS=Homo sapiens GN=PRPF31 PE=1 SV=2 - [PRP31_HUMAN]	0.536863	0.586803		0.714339	0.734733		4	-0.649113	0.219567	0.0048315	true	true	wrong	true	wrong	wrong	wrong	wrong		0.514829	0.554507		0.652937	0.667483		4	-0.751685	0.182008	0.00185807	true	true	wrong	true	wrong	wrong	wrong	wrong		0.88873	0.997545		0.759396	0.895568		4	-0.182482	0.162034
O14654	IRS4	Insulin receptor substrate 4 OS=Homo sapiens GN=IRS4 PE=1 SV=1 - [IRS4_HUMAN]	0.250278	0.182264	0.197967	0.309827	0.145325	0.264996	6	-2.19667	0.401129	2.0605e-05	true	true	wrong	true	wrong	wrong	wrong	wrong		0.353076	0.457214	0.243667	0.384627	0.377609	0.212443	6	-1.6144	0.42691	0.000123245	true	true	wrong	true	wrong	wrong	wrong	wrong		0.981093	0.722078	0.843891	0.982619	0.615837	1.29913	6	-0.181552	0.378405
Q92979	EMG1	Ribosomal RNA small subunit methyltransferase NEP1 OS=Homo sapiens GN=EMG1 PE=1 SV=4 - [NEP1_HUMAN]		0.515108	0.57183		0.522518	0.583484	4	-0.86927	0.0906448	0.000154768	true	true	wrong	true	wrong	wrong	wrong	wrong			0.88744	0.548746		0.870747	0.404007	4	-0.636323	0.550514	0.0519328	true	true	wrong	wrong	wrong	wrong	wrong	wrong		0.706583	0.769887	1.33734	0.581418	0.815348	1.36902	6	-0.18045	0.505581
P28482	MAPK1	Mitogen-activated protein kinase 1 OS=Homo sapiens GN=MAPK1 PE=1 SV=3 - [MK01_HUMAN]	0.77131	1.26898	0.824349	0.616279		0.471105	5	-0.418769	0.530587	0.0761777	true	true	wrong	wrong	wrong	wrong	true	wrong		0.567205	0.642835	1.00196	0.613433		1.15666	5	-0.389555	0.463138	0.0665788	true	true	wrong	wrong	wrong	wrong	true	wrong		1.33294	1.93439	0.599191	0.917448		0.378683	5	-0.179531	0.927483
P00505	GOT2	Aspartate aminotransferase, mitochondrial OS=Homo sapiens GN=GOT2 PE=1 SV=3 - [AATM_HUMAN]	1.28303	1.41808	0.888503	1.07609	1.35167	0.639842	6	0.0982119	0.440375	0.304177	true	true	wrong	wrong	wrong	wrong	wrong	wrong		1.10896	1.08294	1.55229	1.03969	0.972775	1.327	6	0.220509	0.252004	0.0424776	true	true	wrong	wrong	wrong	wrong	wrong	wrong		1.09001	1.26318	0.526866	1.13084	1.42517	0.405713	6	-0.179338	0.745296
P62266	RPS23	40S ribosomal protein S23 OS=Homo sapiens GN=RPS23 PE=1 SV=3 - [RS23_HUMAN]	0.576428		0.890488	0.475944	0.639327	0.964992	5	-0.546008	0.42882	0.0232651	true	true	wrong	wrong	wrong	wrong	wrong	wrong		0.802353		0.499022	0.709303	0.993653	0.388018	5	-0.638206	0.543393	0.0292083	true	true	wrong	wrong	wrong	wrong	wrong	wrong		0.712804		1.35716	0.53384	0.629316	1.65414	5	-0.179083	0.718663
Q9Y450	HBS1L	HBS1-like protein OS=Homo sapiens GN=HBS1L PE=1 SV=1 - [HBS1L_HUMAN]	0.376981	0.493303					2	-1.21345	0.274344	0.0504605	true	wrong	wrong	wrong	wrong	wrong	wrong	wrong		0.40977	0.433146		0.710011			3	-0.996092	0.436588	0.0292377	true	true	wrong	wrong	wrong	wrong	wrong	wrong		0.740083	1.05436					2	-0.178939	0.36105
Q92947	GCDH	Glutaryl-CoA dehydrogenase, mitochondrial OS=Homo sapiens GN=GCDH PE=1 SV=1 - [GCDH_HUMAN]			0.545397		0.735315		2	-0.659094	0.304803	0.100601	true	wrong	wrong	wrong	wrong	wrong	wrong	wrong				0.795127		0.919886		2	-0.225608	0.148683	0.13881	true	wrong	wrong	wrong	wrong	wrong	wrong	wrong				0.725731		1.07562		2	-0.178663	0.401396
Q53GQ0	HSD17B12	Estradiol 17-beta-dehydrogenase 12 OS=Homo sapiens GN=HSD17B12 PE=1 SV=2 - [DHB12_HUMAN]	0.392059	0.418541			0.455428		3	-1.24737	0.108368	0.00125321	true	true	wrong	true	wrong	wrong	wrong	wrong		0.510064	0.444295			0.563393		3	-0.989816	0.172064	0.00496157	true	true	wrong	true	wrong	wrong	wrong	wrong		0.819544	1.00465			0.841199		3	-0.176632	0.159874
O43663	PRC1	Protein regulator of cytokinesis 1 OS=Homo sapiens GN=PRC1 PE=1 SV=2 - [PRC1_HUMAN]	0.531119	0.705532	0.978457	0.721361	0.781626		5	-0.454837	0.316853	0.0162969	true	true	wrong	wrong	wrong	wrong	wrong	wrong		0.785844	1.14794	0.719473	1.73917		0.688593	5	-0.0726995	0.567202	0.394325	true	true	wrong	wrong	wrong	wrong	wrong	wrong		0.944753	0.860122	1.4583	0.51796			4	-0.176044	0.612925
P78527	PRKDC	DNA-dependent protein kinase catalytic subunit OS=Homo sapiens GN=PRKDC PE=1 SV=3 - [PRKDC_HUMAN]	0.282835	0.247495	0.296447	0.271658	0.231963	0.331402	6	-1.86203	0.18414	1.00034e-06	true	true	wrong	true	wrong	wrong	wrong	wrong		0.395539	0.368662	0.27637	0.396697	0.348185	0.178024	6	-1.66315	0.448175	0.00013482	true	true	wrong	true	wrong	wrong	wrong	wrong		0.833545	0.775969	0.957525	0.751836	0.726446	1.43079	6	-0.174497	0.366919
O75152	ZC3H11A	Zinc finger CCCH domain-containing protein 11A OS=Homo sapiens GN=ZC3H11A PE=1 SV=3 - [ZC11A_HUMAN]	0.635443	0.444536	0.6551		0.466757	0.551476	5	-0.878379	0.253075	0.000742761	true	true	wrong	true	wrong	wrong	wrong	wrong		0.609746	0.598255	0.477907		0.543898	0.438333	5	-0.917715	0.206246	0.000286548	true	true	wrong	true	wrong	wrong	wrong	wrong		1.15824	0.756003	0.958786		0.771354	0.858377	5	-0.169434	0.253339
P10155	TROVE2	60 kDa SS-A/Ro ribonucleoprotein OS=Homo sapiens GN=TROVE2 PE=1 SV=2 - [RO60_HUMAN]				0.713009	0.742945	0.634302	3	-0.52448	0.118335	0.00827436	true	true	wrong	wrong	wrong	wrong	wrong	wrong					0.68014	0.734598	0.616859	3	-0.566019	0.1263	0.00809733	true	true	wrong	wrong	wrong	wrong	wrong	wrong					0.9843	0.993123	0.721562	3	-0.167863	0.262434
Q92890	UFD1L	Ubiquitin fusion degradation protein 1 homolog OS=Homo sapiens GN=UFD1L PE=1 SV=3 - [UFD1_HUMAN]	1.13287	1.38594	1.37714		1.63541	0.658396	5	0.243841	0.509201	0.172288	true	true	wrong	wrong	wrong	wrong	wrong	wrong		1.46678	1.30586	1.5462		2.01013	1.60995	5	0.652136	0.228668	0.00155098	true	true	wrong	true	wrong	wrong	wrong	wrong		0.923716	1.26946	0.818506		0.949332	0.614641	5	-0.167281	0.378764
Q9BY77	POLDIP3	Polymerase delta-interacting protein 3 OS=Homo sapiens GN=POLDIP3 PE=1 SV=2 - [PDIP3_HUMAN]	0.620314	0.673272	0.77851	0.483261	0.702934	0.482981	6	-0.704751	0.287225	0.000916078	true	true	wrong	true	wrong	wrong	wrong	wrong		0.773155	0.989339	0.504205	0.731915	0.960664	0.418499	6	-0.523234	0.501344	0.025433	true	true	wrong	wrong	wrong	wrong	wrong	wrong		0.872633	0.839027	1.10491	0.736988	0.804445	1.04011	6	-0.167221	0.224193
P14868	DARS	Aspartate--tRNA ligase, cytoplasmic OS=Homo sapiens GN=DARS PE=1 SV=2 - [SYDC_HUMAN]	0.555784	0.590034	0.587584	0.488865	0.520858	0.675605	6	-0.819158	0.162144	3.05244e-05	true	true	wrong	true	wrong	wrong	wrong	wrong		0.610607	0.578078	0.509771	0.588949	0.637842	0.513329	6	-0.808165	0.132326	1.20796e-05	true	true	wrong	true	wrong	wrong	wrong	wrong		0.922477	0.991272	0.939065	0.768561	0.918695	0.824307	6	-0.16677	0.135615
Q14C86	GAPVD1	GTPase-activating protein and VPS9 domain-containing protein 1 OS=Homo sapiens GN=GAPVD1 PE=1 SV=2 - [GAPD1_HUMAN]		0.231163	0.367081				2	-1.77942	0.471775	0.05899	true	wrong	wrong	wrong	wrong	wrong	wrong	wrong			0.175097	0.228912				2	-2.32045	0.273398	0.0264579	true	wrong	wrong	wrong	wrong	wrong	wrong	wrong			0.689621	1.15453				2	-0.164408	0.525685
Q9BSD7	NTPCR	Cancer-related nucleoside-triphosphatase OS=Homo sapiens GN=NTPCR PE=1 SV=1 - [NTPCR_HUMAN]	0.714197			0.661587	0.692511	0.577121	4	-0.601187	0.135713	0.0015157	true	true	wrong	true	wrong	wrong	wrong	wrong		0.681879			0.720614	0.819262	0.436007	4	-0.627573	0.395861	0.0252273	true	true	wrong	wrong	wrong	wrong	wrong	wrong		1.02897			0.840665	0.809825	0.905868	4	-0.164036	0.152443
P13637	ATP1A3	Sodium/potassium-transporting ATPase subunit alpha-3 OS=Homo sapiens GN=ATP1A3 PE=1 SV=3 - [AT1A3_HUMAN]	0.487675	0.544718				0.638515	3	-0.853212	0.195435	0.00852172	true	true	wrong	wrong	wrong	wrong	wrong	wrong		0.567683	0.626333				0.473055	3	-0.857254	0.205463	0.00930757	true	true	wrong	wrong	wrong	wrong	wrong	wrong		0.784113	0.851863				1.06714	3	-0.162807	0.230088
Q08211	DHX9	ATP-dependent RNA helicase A OS=Homo sapiens GN=DHX9 PE=1 SV=4 - [DHX9_HUMAN]	0.715855	0.615163	0.610758		0.573446	0.760671	5	-0.618295	0.171651	0.00064509	true	true	wrong	true	wrong	wrong	wrong	wrong		0.67153	0.650058	0.665831		0.701091	0.569787	5	-0.621287	0.113399	0.00012747	true	true	wrong	true	wrong	wrong	wrong	wrong		1.06281	0.987551	0.760812		0.850993	0.842804	5	-0.160818	0.193225
P13861	PRKAR2A	cAMP-dependent protein kinase type II-alpha regulatory subunit OS=Homo sapiens GN=PRKAR2A PE=1 SV=2 - [KAP2_HUMAN]	0.695481			0.6251	0.641322	2.14256	4	-0.185825	0.859284	0.347288	true	true	wrong	wrong	wrong	wrong	wrong	wrong		0.692277			0.622807	0.71462	0.959834	4	-0.439404	0.267317	0.0230821	true	true	wrong	wrong	wrong	wrong	wrong	wrong		0.959323			0.893562	0.837584		3	-0.159322	0.0979264
P46776	RPL27A	60S ribosomal protein L27a OS=Homo sapiens GN=RPL27A PE=1 SV=2 - [RL27A_HUMAN]	0.498831	0.750281	0.916489	0.44785	0.689236	0.859701	6	-0.57627	0.419718	0.0100196	true	true	wrong	wrong	wrong	wrong	wrong	wrong		0.737023	1.00771	0.449953	0.789198	1.0812	0.365195	6	-0.543908	0.630502	0.0441384	true	true	wrong	wrong	wrong	wrong	wrong	wrong		0.642062	0.765648	1.61887	0.58774	0.660249	1.68435	6	-0.157158	0.693431
P40926	MDH2	Malate dehydrogenase, mitochondrial OS=Homo sapiens GN=MDH2 PE=1 SV=3 - [MDHM_HUMAN]	0.968249	0.978561	0.602783	0.915189	0.887353	0.576158	6	-0.317308	0.349628	0.0384163	true	true	wrong	wrong	wrong	wrong	wrong	wrong		0.841845	0.848675	1.20667	0.833567	0.852474	1.00557	6	-0.116491	0.215325	0.121218	true	true	wrong	wrong	wrong	wrong	wrong	wrong		1.31107	1.3452	0.423705	1.18173	1.10705	0.533463	6	-0.156538	0.724549
Q14498	RBM39	RNA-binding protein 39 OS=Homo sapiens GN=RBM39 PE=1 SV=2 - [RBM39_HUMAN]	0.731895	0.7726	0.81084	0.658763	0.757405	0.746928	6	-0.424833	0.100417	7.20212e-05	true	true	wrong	true	wrong	wrong	wrong	wrong		0.667541	0.798136	0.600037	0.693144	0.797202	0.518925	6	-0.574566	0.24092	0.00104	true	true	wrong	true	wrong	wrong	wrong	wrong		1.03037	0.9171	1.01715	0.896852	0.808591	0.749272	6	-0.156194	0.18095
P82979	SARNP	SAP domain-containing ribonucleoprotein OS=Homo sapiens GN=SARNP PE=1 SV=3 - [SARNP_HUMAN]	1.17906	1.36195	0.881721	1.10421	1.36456	0.877861	6	0.150868	0.285788	0.12625	true	true	wrong	wrong	wrong	wrong	wrong	wrong		0.932943	1.10548	1.44169	0.831684	0.96106	1.1137	6	0.0674103	0.275807	0.287736	true	true	wrong	wrong	wrong	wrong	wrong	wrong		1.22508	1.26556	0.456751	0.916453	1.39887	0.576959	6	-0.155487	0.665458
P55769	NHP2L1	NHP2-like protein 1 OS=Homo sapiens GN=NHP2L1 PE=1 SV=3 - [NH2L1_HUMAN]	0.588201		0.256055	0.497195	0.300196	0.406224	5	-1.35498	0.497147	0.00183316	true	true	wrong	true	wrong	wrong	wrong	wrong		0.476029		0.357781	0.455306	0.481544	0.319719	5	-1.27764	0.269316	0.00022351	true	true	wrong	true	wrong	wrong	wrong	wrong		1.35396		0.600679	1.11641	0.666405	0.966518	5	-0.154788	0.495617
P34931	HSPA1L	Heat shock 70 kDa protein 1-like OS=Homo sapiens GN=HSPA1L PE=1 SV=2 - [HS71L_HUMAN]	0.184507		0.224394		0.0969215		3	-2.65373	0.633673	0.0092405	true	true	wrong	wrong	wrong	wrong	wrong	wrong		0.137736		0.128302		0.134213		3	-2.90661	0.0517964	5.29184e-05	true	true	wrong	true	wrong	wrong	wrong	wrong		1.11419		1.11689		0.585707		3	-0.15209	0.536642
P02545	LMNA	Prelamin-A/C OS=Homo sapiens GN=LMNA PE=1 SV=1 - [LMNA_HUMAN]	1.25276		0.203281	1.68668	0.781836	0.575863	5	-0.474084	1.18254	0.210345	true	true	wrong	wrong	wrong	wrong	wrong	wrong		0.792279		0.700093	0.802179	1.16688	1.10343	5	-0.160731	0.323697	0.164555	true	true	wrong	wrong	wrong	wrong	wrong	wrong		1.73221		0.40942	2.17241	0.993123	0.387104	5	-0.151121	1.15125
O60488	ACSL4	Long-chain-fatty-acid--CoA ligase 4 OS=Homo sapiens GN=ACSL4 PE=1 SV=2 - [ACSL4_HUMAN]	0.451773	0.428769			0.452427		3	-1.17077	0.044146	0.0002368	true	true	wrong	true	wrong	wrong	wrong	wrong		0.521208	0.458401			0.472034		3	-1.04947	0.0970781	0.00142002	true	true	wrong	true	wrong	wrong	wrong	wrong		0.855929	0.92467			0.923848		3	-0.150566	0.063977
Q8TAQ2	SMARCC2	SWI/SNF complex subunit SMARCC2 OS=Homo sapiens GN=SMARCC2 PE=1 SV=1 - [SMRC2_HUMAN]	0.974568	1.01456					2	-0.00815468	0.0410264	0.412774	true	wrong	wrong	wrong	wrong	wrong	wrong	wrong		1.19297	0.972123					2	0.106886	0.208844	0.300573	true	wrong	wrong	wrong	wrong	wrong	wrong	wrong		0.7983	1.01963					2	-0.148477	0.249637
Q9Y277	VDAC3	Voltage-dependent anion-selective channel protein 3 OS=Homo sapiens GN=VDAC3 PE=1 SV=1 - [VDAC3_HUMAN]	1.88415	2.42022		1.61917	3.35482	5.64476	5	1.42549	0.719094	0.00569928	true	true	true	wrong	wrong	wrong	wrong	wrong		1.68455	1.68736			2.56415	8.13304	4	1.47235	1.07289	0.0355301	true	true	true	wrong	wrong	wrong	wrong	wrong		1.07417	1.15258			1.15617	0.463354	4	-0.148091	0.643019
P16615	ATP2A2	Sarcoplasmic/endoplasmic reticulum calcium ATPase 2 OS=Homo sapiens GN=ATP2A2 PE=1 SV=1 - [AT2A2_HUMAN]	0.381695	0.388011	0.390718	0.295847	0.270862	0.451667	6	-1.48321	0.278562	2.36331e-05	true	true	wrong	true	wrong	wrong	wrong	wrong		0.54901	0.499589	0.419836	0.353144	0.469481	0.386013	6	-1.1807	0.238793	3.38918e-05	true	true	wrong	true	wrong	wrong	wrong	wrong		0.829229	0.830092	0.834008	1.08728	0.689751	1.2627	6	-0.146548	0.316176
Q8N1F7	NUP93	Nuclear pore complex protein Nup93 OS=Homo sapiens GN=NUP93 PE=1 SV=2 - [NUP93_HUMAN]	0.545539	0.671599	0.620778	0.530518	0.845648	0.55944	6	-0.688461	0.253155	0.000575307	true	true	wrong	true	wrong	wrong	wrong	wrong		0.70176	0.677394	0.469047	0.765945	0.716131	0.398027	6	-0.726755	0.386554	0.00290626	true	true	wrong	true	wrong	wrong	wrong	wrong		0.762178	0.960311	1.08836	0.663275	0.972707	1.06469	6	-0.14498	0.285076
P42285	SKIV2L2	Superkiller viralicidic activity 2-like 2 OS=Homo sapiens GN=SKIV2L2 PE=1 SV=3 - [SK2L2_HUMAN]	0.446923	0.292446	0.512118		0.276911	0.523254	5	-1.33761	0.443646	0.0012614	true	true	wrong	true	wrong	wrong	wrong	wrong		0.625405	0.516882	0.374726		0.506326	0.339718	5	-1.11696	0.361425	0.00115024	true	true	wrong	true	wrong	wrong	wrong	wrong		0.877166	0.677172	1.29254		0.625372	1.26128	5	-0.144721	0.488659
P52815	MRPL12	39S ribosomal protein L12, mitochondrial OS=Homo sapiens GN=MRPL12 PE=1 SV=2 - [RM12_HUMAN]	1.11574	0.910608		0.710146	0.827994	0.732299	5	-0.238544	0.263982	0.0567108	true	true	wrong	wrong	wrong	wrong	wrong	wrong		0.723253	1.13394		0.565911	1.00424	0.676634	5	-0.332978	0.415107	0.0736606	true	true	wrong	wrong	wrong	wrong	wrong	wrong		1.42133	0.740141		1.1226	0.740932	0.69547	5	-0.143314	0.456219
Q99567	NUP88	Nuclear pore complex protein Nup88 OS=Homo sapiens GN=NUP88 PE=1 SV=2 - [NUP88_HUMAN]	0.45085	0.368134	0.419556	0.382297		0.387646	5	-1.31969	0.117455	7.45076e-06	true	true	wrong	true	wrong	wrong	wrong	wrong		0.661364	0.575644	0.310567	0.658453		0.277907	5	-1.10609	0.611465	0.0077708	true	true	wrong	wrong	wrong	wrong	wrong	wrong		0.700682	0.810967	1.31965	0.675316		1.20941	5	-0.141473	0.450215
Q9UFW8	CGGBP1	CGG triplet repeat-binding protein 1 OS=Homo sapiens GN=CGGBP1 PE=1 SV=2 - [CGBP1_HUMAN]	0.522505	0.63066		0.680767	0.518723		4	-0.77582	0.196836	0.00212706	true	true	wrong	true	wrong	wrong	wrong	wrong		0.552737	0.626272		0.981624	0.435371		4	-0.689228	0.492349	0.0339333	true	true	wrong	wrong	wrong	wrong	wrong	wrong		0.822499	0.98671		0.822007	1.01912		4	-0.139167	0.166421
Q00403	GTF2B	Transcription initiation factor IIB OS=Homo sapiens GN=GTF2B PE=1 SV=1 - [TF2B_HUMAN]				0.650709			1	-0.619914	n.a.	n.a.	true	wrong	wrong	wrong	wrong	wrong	wrong	wrong					0.65345			1	-0.61385	n.a.	n.a.	true	wrong	wrong	wrong	wrong	wrong	wrong	wrong					0.910892			1	-0.134648	n.a.
O96019	ACTL6A	Actin-like protein 6A OS=Homo sapiens GN=ACTL6A PE=1 SV=1 - [ACL6A_HUMAN]	0.66306	0.671646		0.615635	0.595868	1.08582	5	-0.499004	0.35282	0.0170505	true	true	wrong	wrong	wrong	wrong	wrong	wrong		0.822009	0.806502		0.884807	0.853498	0.438455	5	-0.437526	0.423494	0.041009	true	true	wrong	wrong	wrong	wrong	wrong	wrong		0.867921	0.895397		0.697223	0.631452	1.85431	5	-0.13129	0.609361
Q9Y5M8	SRPRB	Signal recognition particle receptor subunit beta OS=Homo sapiens GN=SRPRB PE=1 SV=3 - [SRPRB_HUMAN]	0.580375	0.729184			0.610199	1.45092	4	-0.354068	0.610599	0.165035	true	true	wrong	wrong	wrong	wrong	wrong	wrong		0.449347	0.490168			0.426549	2.72391	4	-0.491572	1.29415	0.251343	true	true	wrong	wrong	wrong	wrong	wrong	wrong		1.18312	1.36148			1.27885	0.338221	4	-0.130337	0.959336
P62888	RPL30	60S ribosomal protein L30 OS=Homo sapiens GN=RPL30 PE=1 SV=2 - [RL30_HUMAN]	0.591921	2.0167	1.04408	0.584236	0.828785	0.965496	6	-0.129877	0.659744	0.325013	true	true	wrong	wrong	wrong	wrong	wrong	wrong		0.768386		0.384314	0.886427	1.01488	0.519524	5	-0.571419	0.578472	0.0458741	true	true	wrong	wrong	wrong	wrong	wrong	wrong		0.745967		1.48731	0.595336	0.769537	1.25397	5	-0.129953	0.55489
Q9UK59	DBR1	Lariat debranching enzyme OS=Homo sapiens GN=DBR1 PE=1 SV=2 - [DBR1_HUMAN]				1.16229	1.51152	0.762244	3	0.140431	0.498264	0.336854	true	true	wrong	wrong	wrong	wrong	wrong	wrong					0.781961	1.51569	1.18891	3	0.164927	0.483007	0.30709	true	true	wrong	wrong	wrong	wrong	wrong	wrong					1.35986	0.954149	0.588879	3	-0.129404	0.606068
P62854	RPS26	40S ribosomal protein S26 OS=Homo sapiens GN=RPS26 PE=1 SV=3 - [RS26_HUMAN]	0.466719	0.597514	1.04792	0.436002	0.661158	0.886173	6	-0.623945	0.500055	0.0141095	true	true	wrong	wrong	wrong	wrong	wrong	wrong		0.646743	0.668381	0.415338	0.645834	0.532573	0.282224	6	-0.973739	0.491135	0.00232381	true	true	wrong	true	wrong	wrong	wrong	wrong		0.563437	0.679431	1.70806	0.549541	0.866936	1.87467	6	-0.129331	0.787725
P62847	RPS24	40S ribosomal protein S24 OS=Homo sapiens GN=RPS24 PE=1 SV=1 - [RS24_HUMAN]	0.57129	0.764276	0.975987	0.520096	0.674146	0.856943	6	-0.494225	0.346765	0.00872472	true	true	wrong	wrong	wrong	wrong	wrong	wrong		0.813238	1.12708	0.45432	0.803437	0.984206	0.326367	6	-0.536337	0.692558	0.0581583	true	true	wrong	wrong	wrong	wrong	wrong	wrong		0.706779	0.680099	1.60285	0.621037	0.762625	1.61943	6	-0.126489	0.638143
P52565	ARHGDIA	Rho GDP-dissociation inhibitor 1 OS=Homo sapiens GN=ARHGDIA PE=1 SV=3 - [GDIR1_HUMAN]	1.26811	1.16509	0.518903	0.8011	1.34492	0.638236	6	-0.153935	0.569996	0.268772	true	true	wrong	wrong	wrong	wrong	wrong	wrong		1.36429	0.916813	1.41968	0.942201	0.811385	2.31469	6	0.2753	0.562457	0.142136	true	true	wrong	wrong	wrong	wrong	wrong	wrong		1.17361	1.60666	0.353626	1.00206	2.04366	0.433096	6	-0.126302	1.01935
P18583	SON	Protein SON OS=Homo sapiens GN=SON PE=1 SV=4 - [SON_HUMAN]		0.516258		0.474595	0.505192	0.835905	4	-0.818189	0.3766	0.0112526	true	true	wrong	wrong	wrong	wrong	wrong	wrong			0.684707		0.457141	0.718358	0.420527	4	-0.850672	0.395346	0.0115456	true	true	wrong	wrong	wrong	wrong	wrong	wrong			0.699301		1.16364	0.658987	1.32803	4	-0.12244	0.511091
P00390	GSR	Glutathione reductase, mitochondrial OS=Homo sapiens GN=GSR PE=1 SV=2 - [GSHR_HUMAN]	0.603443			0.69218	0.773908	0.660046	4	-0.557155	0.149469	0.00249825	true	true	wrong	true	wrong	wrong	wrong	wrong		0.598371			0.654258	0.778244	0.885002	4	-0.472727	0.252687	0.016654	true	true	wrong	wrong	wrong	wrong	wrong	wrong		1.03185			1.07606	0.993439	0.651134	4	-0.11937	0.33638
Q86UE4	MTDH	Protein LYRIC OS=Homo sapiens GN=MTDH PE=1 SV=2 - [LYRIC_HUMAN]	0.514923	0.455442	0.479591	0.562455	0.500376	0.532584	6	-0.98173	0.108332	1.72312e-06	true	true	wrong	true	wrong	wrong	wrong	wrong		0.576112	0.585888	0.510122	0.661562	0.645428	0.417378	6	-0.837711	0.246429	0.000204179	true	true	wrong	true	wrong	wrong	wrong	wrong		1.00452	0.916326	0.901	0.882797	0.84228	0.99004	6	-0.118645	0.0979476
Q13356	PPIL2	Peptidyl-prolyl cis-trans isomerase-like 2 OS=Homo sapiens GN=PPIL2 PE=1 SV=1 - [PPIL2_HUMAN]	0.443176	0.519942	0.581494				3	-0.966597	0.196953	0.00677925	true	true	wrong	wrong	wrong	wrong	wrong	wrong		0.588539	0.592961	0.446008				3	-0.894547	0.23416	0.0110431	true	true	wrong	wrong	wrong	wrong	wrong	wrong		0.797031	0.928343	1.05965				3	-0.116994	0.20561
Q8NFW8	CMAS	N-acylneuraminate cytidylyltransferase OS=Homo sapiens GN=CMAS PE=1 SV=2 - [NEUA_HUMAN]	0.533787			0.487915	0.61992		3	-0.876935	0.174509	0.00647218	true	true	wrong	wrong	wrong	wrong	wrong	wrong		0.515071			0.580411	0.701971		3	-0.750842	0.225254	0.0143572	true	true	wrong	wrong	wrong	wrong	wrong	wrong		1.0448			0.847892	0.886738		3	-0.116078	0.158615
Q9UM00	TMCO1	Transmembrane and coiled-coil domain-containing protein 1 OS=Homo sapiens GN=TMCO1 PE=1 SV=1 - [TMCO1_HUMAN]	0.249087					0.428093	2	-1.61464	0.552444	0.0755581	true	wrong	wrong	wrong	wrong	wrong	wrong	wrong		0.466853		0.62579			0.886178	3	-0.649847	0.462879	0.0677814	true	true	wrong	wrong	wrong	wrong	wrong	wrong		1.14579					0.743554	2	-0.115573	0.441117
P50914	RPL14	60S ribosomal protein L14 OS=Homo sapiens GN=RPL14 PE=1 SV=4 - [RL14_HUMAN]	0.605928	0.692692	0.791646	0.584928	0.660414	0.784882	6	-0.551874	0.183405	0.000361162	true	true	wrong	true	wrong	wrong	wrong	wrong		0.737097	0.778502	0.555115	0.851329	0.835326	0.481736	6	-0.532655	0.338947	0.00600442	true	true	wrong	wrong	wrong	wrong	wrong	wrong		0.861474	0.930703	1.15699	0.716852	0.80667	1.16421	6	-0.113199	0.282565
P61254	RPL26	60S ribosomal protein L26 OS=Homo sapiens GN=RPL26 PE=1 SV=1 - [RL26_HUMAN]				0.584158	0.887596	1.15262	3	-0.247558	0.49459	0.238682	true	true	wrong	wrong	wrong	wrong	wrong	wrong					0.777305	1.12437	0.521856	3	-0.377535	0.553833	0.179558	true	true	wrong	wrong	wrong	wrong	wrong	wrong					0.683146	0.746609	1.552	3	-0.112394	0.649672
Q96PK6	RBM14	RNA-binding protein 14 OS=Homo sapiens GN=RBM14 PE=1 SV=2 - [RBM14_HUMAN]	0.655403	0.397012	0.441416	0.566652	0.417375	0.379702	6	-1.09986	0.314265	0.000177976	true	true	wrong	true	wrong	wrong	wrong	wrong		0.533741	0.533609	0.388637	0.471246	0.476207	0.335321	6	-1.15127	0.267207	6.59717e-05	true	true	wrong	true	wrong	wrong	wrong	wrong		1.30624	0.877101	0.916369	1.12779	0.729251	0.727835	6	-0.111681	0.338536
Q9Y617	PSAT1	Phosphoserine aminotransferase OS=Homo sapiens GN=PSAT1 PE=1 SV=2 - [SERC_HUMAN]	1.16444			0.584161		1.06848	3	-0.153455	0.54232	0.336276	true	true	wrong	wrong	wrong	wrong	wrong	wrong		1.34147			0.903959		2.67695	3	0.566243	0.792784	0.170797	true	true	wrong	wrong	wrong	wrong	wrong	wrong		1.46423			1.15727		0.469442	3	-0.110038	0.866307
P46782	RPS5	40S ribosomal protein S5 OS=Homo sapiens GN=RPS5 PE=1 SV=4 - [RS5_HUMAN]	0.532294	0.859627	0.865777	0.339806	0.79015	0.75558	6	-0.606203	0.532429	0.0192476	true	true	wrong	wrong	wrong	wrong	wrong	wrong		0.732471	0.866933	0.623099	0.712207	0.922366	0.634596	6	-0.433323	0.231132	0.00294075	true	true	wrong	true	wrong	wrong	wrong	wrong		0.798775	1.11849	1.17414	0.488955	1.05427	1.18437	6	-0.10714	0.499366
O00151	PDLIM1	PDZ and LIM domain protein 1 OS=Homo sapiens GN=PDLIM1 PE=1 SV=4 - [PDLI1_HUMAN]	1.29848		0.889129				2	0.103646	0.386335	0.384573	true	wrong	wrong	wrong	wrong	wrong	wrong	wrong		1.52761		1.75853				2	0.712822	0.143612	0.0450435	true	wrong	wrong	wrong	wrong	wrong	wrong	wrong		1.37696		0.627146				2	-0.105822	0.802292
P28370	SMARCA1	Probable global transcription activator SNF2L1 OS=Homo sapiens GN=SMARCA1 PE=1 SV=2 - [SMCA1_HUMAN]	0.962023				0.315954		2	-0.859035	1.13587	0.239308	true	wrong	wrong	wrong	wrong	wrong	wrong	wrong		0.576064				0.397814		2	-1.06277	0.37769	0.0783669	true	wrong	wrong	wrong	wrong	wrong	wrong	wrong		1.3223				0.653725		2	-0.105096	0.718629
Q9UBU9	NXF1	Nuclear RNA export factor 1 OS=Homo sapiens GN=NXF1 PE=1 SV=1 - [NXF1_HUMAN]	0.706848	1.01723	1.19398	0.745331	1.34786	0.97476	6	-0.0417276	0.366814	0.395836	true	true	wrong	wrong	wrong	wrong	wrong	wrong		1.10641	1.35766	0.655711	0.883779	1.15089	0.592237	6	-0.125518	0.476677	0.273677	true	true	wrong	wrong	wrong	wrong	wrong	wrong		0.66724	0.762441	1.54215	0.678083	0.907344	1.33863	6	-0.105012	0.515573
P46778	RPL21	60S ribosomal protein L21 OS=Homo sapiens GN=RPL21 PE=1 SV=2 - [RL21_HUMAN]	0.281913			0.286579		0.557231	3	-1.49111	0.560839	0.0220313	true	true	wrong	wrong	wrong	wrong	wrong	wrong		0.359334			0.47636		0.314731	3	-1.40476	0.305371	0.00769456	true	true	wrong	wrong	wrong	wrong	wrong	wrong		0.839281			0.600268		1.60089	3	-0.103407	0.719325
Q9UMS4	PRPF19	Pre-mRNA-processing factor 19 OS=Homo sapiens GN=PRPF19 PE=1 SV=1 - [PRP19_HUMAN]	0.678264	0.570479	0.895299	0.497489	0.539783	0.536949	6	-0.720558	0.313167	0.00121919	true	true	wrong	true	wrong	wrong	wrong	wrong		0.788459	0.729179	0.649998	0.785516	0.784008	0.457651	6	-0.541178	0.306731	0.00377909	true	true	wrong	true	wrong	wrong	wrong	wrong		0.96215	1.02246	1.23442	0.689484	0.751717	1.03742	6	-0.102489	0.314163
P62277	RPS13	40S ribosomal protein S13 OS=Homo sapiens GN=RPS13 PE=1 SV=2 - [RS13_HUMAN]	0.503253	0.801569	0.933826	0.457841	0.732682	0.90859	6	-0.52044	0.437863	0.0166719	true	true	wrong	wrong	wrong	wrong	wrong	wrong		0.855865	1.14725	0.455309	0.869548	1.15183	0.393082	6	-0.417713	0.667553	0.0929576	true	true	wrong	wrong	wrong	wrong	wrong	wrong		0.658046	0.815245	1.74693	0.54758	0.744122	1.72242	6	-0.100738	0.719758
Q12931	TRAP1	Heat shock protein 75 kDa, mitochondrial OS=Homo sapiens GN=TRAP1 PE=1 SV=3 - [TRAP1_HUMAN]	1.03128	1.1522	0.779627	1.01728	1.21858	0.850571	6	-0.00564867	0.248603	0.478886	true	true	wrong	wrong	wrong	wrong	wrong	wrong		0.782851	0.841152	1.05024	0.928544	0.88323	0.940286	6	-0.151159	0.145845	0.0259867	true	true	wrong	wrong	wrong	wrong	wrong	wrong		1.19887	1.24369	0.551386	1.05538	1.24407	0.609674	6	-0.100604	0.540248
Q8N752	CSNK1A1L	Casein kinase I isoform alpha-like OS=Homo sapiens GN=CSNK1A1L PE=2 SV=2 - [KC1AL_HUMAN]	0.517605						1	-0.950075	n.a.	n.a.	true	wrong	wrong	wrong	wrong	wrong	wrong	wrong		0.543572						1	-0.879456	n.a.	n.a.	true	wrong	wrong	wrong	wrong	wrong	wrong	wrong		0.933338						1	-0.099529	n.a.
O94776	MTA2	Metastasis-associated protein MTA2 OS=Homo sapiens GN=MTA2 PE=1 SV=1 - [MTA2_HUMAN]	0.859489	0.744703	1.8333	0.672952	0.70244	1.9656	6	0.0207864	0.710965	0.472842	true	true	wrong	wrong	wrong	wrong	wrong	wrong		0.904757	0.671843	0.647104	0.832466	0.761149	0.576659	6	-0.466438	0.242817	0.00265584	true	true	wrong	true	wrong	wrong	wrong	wrong		0.711979	0.736258	1.64514	0.602294	0.672127	1.90676	6	-0.0978555	0.724466
P99999	CYCS	Cytochrome c OS=Homo sapiens GN=CYCS PE=1 SV=2 - [CYC_HUMAN]	0.970826	1.58359	0.732011	0.954393	1.47823	0.905376	6	0.0872565	0.433955	0.321606	true	true	wrong	wrong	wrong	wrong	wrong	wrong		0.770233	1.30555	1.48221	0.904552	1.3625	1.2706	6	0.203803	0.374809	0.120186	true	true	wrong	wrong	wrong	wrong	wrong	wrong		1.46237	1.33853	0.444916	1.08539	1.31268	0.548835	6	-0.092377	0.736039
P98175	RBM10	RNA-binding protein 10 OS=Homo sapiens GN=RBM10 PE=1 SV=3 - [RBM10_HUMAN]					0.267841	0.426445	2	-1.56506	0.474458	0.0672169	true	wrong	wrong	wrong	wrong	wrong	wrong	wrong						0.367559	0.242596	2	-1.74366	0.423854	0.0541833	true	wrong	wrong	wrong	wrong	wrong	wrong	wrong						0.682249	1.29484	2	-0.089429	0.653652
P62937	PPIA	Peptidyl-prolyl cis-trans isomerase A OS=Homo sapiens GN=PPIA PE=1 SV=2 - [PPIA_HUMAN]	1.30666		0.637535	1.26082	2.11774	0.813161	5	0.170993	0.670292	0.299452	true	true	wrong	wrong	wrong	wrong	wrong	wrong		0.987688		1.47717	0.829888	0.819493	1.30303	5	0.0741237	0.384154	0.344187	true	true	wrong	wrong	wrong	wrong	wrong	wrong		1.21905		0.345391	1.38572	2.35996	0.532727	5	-0.0894143	1.11528
P61221	ABCE1	ATP-binding cassette sub-family E member 1 OS=Homo sapiens GN=ABCE1 PE=1 SV=1 - [ABCE1_HUMAN]			0.865516	0.964702	0.898606	0.783203	4	-0.191749	0.125313	0.0274898	true	true	wrong	wrong	wrong	wrong	wrong	wrong				1.81153	1.30349	0.99379	1.29404	4	0.400621	0.354689	0.0545134	true	true	wrong	wrong	wrong	wrong	wrong	wrong				0.668124	1.02299	1.60196	0.714026	4	-0.0887842	0.57919
O43264	ZW10	Centromere/kinetochore protein zw10 homolog OS=Homo sapiens GN=ZW10 PE=1 SV=3 - [ZW10_HUMAN]	0.589272	0.528621					2	-0.841344	0.110803	0.0295572	true	wrong	wrong	wrong	wrong	wrong	wrong	wrong		0.586562	0.563109					2	-0.799079	0.0416257	0.0117195	true	wrong	wrong	wrong	wrong	wrong	wrong	wrong		0.972996	0.910883					2	-0.0870779	0.0672938
P27695	APEX1	DNA-(apurinic or apyrimidinic site) lyase OS=Homo sapiens GN=APEX1 PE=1 SV=2 - [APEX1_HUMAN]	0.877008	1.05405	0.835016	0.899776	2.01417	0.568301	6	-0.0551619	0.599898	0.415356	true	true	wrong	wrong	wrong	wrong	wrong	wrong		1.14059	1.16205	1.61478	1.1257	2.25835	1.69329	6	0.533952	0.409407	0.0120696	true	true	wrong	wrong	wrong	wrong	wrong	wrong		1.32674	1.64477	0.61653	0.836657	1.72464	0.361212	6	-0.0853448	0.890792
Q8N6R0	METTL13	Methyltransferase-like protein 13 OS=Homo sapiens GN=METTL13 PE=1 SV=1 - [MET13_HUMAN]	0.311486	0.425286	0.377078	0.276312	0.337324	0.234167	6	-1.64019	0.309681	2.42519e-05	true	true	wrong	true	wrong	wrong	wrong	wrong		0.339553	0.402001	0.223747	0.302944	0.381977	0.190355	6	-1.75627	0.433436	8.86037e-05	true	true	wrong	true	wrong	wrong	wrong	wrong		0.899965	1.03746	1.27029	0.834343	0.845383	0.840714	6	-0.0846278	0.241556
Q9BSJ2	TUBGCP2	Gamma-tubulin complex component 2 OS=Homo sapiens GN=TUBGCP2 PE=1 SV=2 - [GCP2_HUMAN]	0.445918				0.453523		2	-1.15295	0.0172507	0.00336757	true	wrong	wrong	true	wrong	wrong	wrong	wrong		0.555806				0.395929		2	-1.09202	0.346016	0.0701597	true	wrong	wrong	wrong	wrong	wrong	wrong	wrong		0.799297				1.11285		2	-0.0844665	0.337616
Q5VUA4	ZNF318	Zinc finger protein 318 OS=Homo sapiens GN=ZNF318 PE=1 SV=2 - [ZN318_HUMAN]		0.282866	0.715718	0.404672	0.270869	0.721482	5	-1.19296	0.691379	0.00908676	true	true	wrong	wrong	wrong	wrong	wrong	wrong			0.401326	0.186201	0.453971	0.388924	0.131877	5	-1.83334	0.791639	0.00330663	true	true	wrong	true	wrong	wrong	wrong	wrong			0.515627	2.04364	0.617286	0.53634	2.14042	5	-0.0842672	1.05339
Q7L2E3	DHX30	Putative ATP-dependent RNA helicase DHX30 OS=Homo sapiens GN=DHX30 PE=1 SV=1 - [DHX30_HUMAN]	0.591402	0.437021	0.476737		0.489592	0.485774	5	-1.01855	0.159726	7.02501e-05	true	true	wrong	true	wrong	wrong	wrong	wrong		0.625405	0.55227	0.4999		0.638749	0.455389	5	-0.863098	0.208639	0.000379684	true	true	wrong	true	wrong	wrong	wrong	wrong		1.13604	0.90686	0.89133		0.90986	0.897779	5	-0.0829695	0.149714
P62333	PSMC6	26S protease regulatory subunit 10B OS=Homo sapiens GN=PSMC6 PE=1 SV=1 - [PRS10_HUMAN]	0.554649	0.497368	0.576577	0.581146	0.560122	0.363765	6	-0.955086	0.259667	0.000140632	true	true	wrong	true	true	wrong	wrong	wrong		0.58282	0.419262	0.4868		0.655293	0.354439	5	-1.03555	0.356122	0.00144324	true	true	wrong	true	wrong	wrong	wrong	wrong		0.869334	1.17702	0.912057			0.851386	4	-0.0829495	0.216097
Q96TA2	YME1L1	ATP-dependent zinc metalloprotease YME1L1 OS=Homo sapiens GN=YME1L1 PE=1 SV=2 - [YMEL1_HUMAN]	0.532028	0.642307		0.481393	0.60496	0.506237	5	-0.862201	0.175025	0.000193042	true	true	wrong	true	wrong	wrong	wrong	wrong		0.473872	0.626306		0.527819	0.641439	0.305797	5	-1.00487	0.432985	0.00328175	true	true	wrong	true	wrong	wrong	wrong	wrong		0.979309	0.992582		0.823132	0.890883	1.0574	5	-0.081577	0.14219
P11182	DBT	Lipoamide acyltransferase component of branched-chain alpha-keto acid dehydrogenase complex, mitochondrial OS=Homo sapiens GN=DBT PE=1 SV=3 - [ODB2_HUMAN]				2.72642			1	1.44701	n.a.	n.a.	true	wrong	true	wrong	wrong	wrong	wrong	wrong					2.63417			1	1.39735	n.a.	n.a.	true	wrong	true	wrong	wrong	wrong	wrong	wrong					0.945237			1	-0.0812515	n.a.
P35232	PHB	Prohibitin OS=Homo sapiens GN=PHB PE=1 SV=1 - [PHB_HUMAN]	1.01365	1.02182	0.853537	0.843727	0.975701	0.751247	6	-0.145176	0.178173	0.0512402	true	true	wrong	wrong	wrong	wrong	wrong	wrong		0.8956	0.890296	1.16532	0.976151	0.933348	0.956908	6	-0.0506463	0.142753	0.212284	true	true	wrong	wrong	wrong	wrong	wrong	wrong		1.25254	1.26855	0.645398	0.891217	1.12907	0.694004	6	-0.0802819	0.428888
P26196	DDX6	Probable ATP-dependent RNA helicase DDX6 OS=Homo sapiens GN=DDX6 PE=1 SV=2 - [DDX6_HUMAN]	0.633376	0.70643	0.874718	0.614437	0.685545	0.907257	6	-0.456852	0.236905	0.00261279	true	true	wrong	true	wrong	wrong	wrong	wrong		0.715022	0.7392	0.638284	0.739438	0.824693	0.526844	6	-0.534293	0.224849	0.00105696	true	true	wrong	true	wrong	wrong	wrong	wrong		0.990634	0.986892	1.08387	0.767089	0.860407	1.02864	6	-0.079189	0.185182
P11171	EPB41	Protein 4.1 OS=Homo sapiens GN=EPB41 PE=1 SV=4 - [41_HUMAN]	0.476453	0.382696	0.619886	0.365251	0.272381	0.353957	6	-1.32882	0.405595	0.000242858	true	true	wrong	true	wrong	wrong	wrong	wrong		0.788261	0.633348	0.331202	0.846452	0.46436	0.259605	6	-0.981533	0.690085	0.00879162	true	true	wrong	wrong	wrong	wrong	wrong	wrong		0.881667	0.871399	1.82144	0.499875	0.863967	1.19203	6	-0.0788502	0.615298
Q99959	PKP2	Plakophilin-2 OS=Homo sapiens GN=PKP2 PE=1 SV=2 - [PKP2_HUMAN]						0.128049	1	-2.96523	n.a.	n.a.	true	wrong	wrong	wrong	wrong	wrong	wrong	wrong							0.0924038	1	-3.4359	n.a.	n.a.	true	wrong	wrong	wrong	wrong	wrong	wrong	wrong							0.951553	1	-0.0716436	n.a.
Q9NWU5	MRPL22	39S ribosomal protein L22, mitochondrial OS=Homo sapiens GN=MRPL22 PE=1 SV=1 - [RM22_HUMAN]	0.548471		2.69504	0.796054	1.6626		4	0.242042	1.03417	0.335814	true	true	wrong	wrong	wrong	wrong	wrong	wrong		0.749769		0.844512	1.35472	2.19435	2.30524	5	0.423482	0.752418	0.138325	true	true	wrong	wrong	wrong	wrong	wrong	wrong		1.3587		0.987159	0.666475	0.92098		4	-0.0701389	0.421507
O15523	DDX3Y	ATP-dependent RNA helicase DDX3Y OS=Homo sapiens GN=DDX3Y PE=1 SV=2 - [DDX3Y_HUMAN]		0.996812	0.91805	0.707891	1.40227	0.457177	5	-0.253555	0.603146	0.200216	true	true	wrong	wrong	wrong	wrong	wrong	wrong			0.973025	0.940553	0.828483	1.36018	1.01157	5	0.0122128	0.264362	0.461348	true	true	wrong	wrong	wrong	wrong	wrong	wrong			1.34499	0.983824	1.19246	1.21597	0.411206	5	-0.0683891	0.697813
Q13685	AAMP	Angio-associated migratory cell protein OS=Homo sapiens GN=AAMP PE=1 SV=2 - [AAMP_HUMAN]	0.533678		0.626098				2	-0.790748	0.16293	0.0460524	true	wrong	wrong	wrong	wrong	wrong	wrong	wrong		1.19006		1.06748				2	0.172618	0.110892	0.135724	true	wrong	wrong	wrong	wrong	wrong	wrong	wrong		0.953517		0.956242	0.955194			3	-0.0664516	0.00207691
Q9NWS0	PIH1D1	PIH1 domain-containing protein 1 OS=Homo sapiens GN=PIH1D1 PE=1 SV=1 - [PIHD1_HUMAN]		0.144492				0.166569	2	-2.68838	0.14505	0.0121382	true	wrong	wrong	wrong	wrong	wrong	wrong	wrong			0.196471				0.125236	2	-2.67244	0.459388	0.0385017	true	wrong	wrong	wrong	wrong	wrong	wrong	wrong			0.852914				1.06987	2	-0.0660441	0.231202
Q9BSJ8	ESYT1	Extended synaptotagmin-1 OS=Homo sapiens GN=ESYT1 PE=1 SV=1 - [ESYT1_HUMAN]	0.74453	0.67404	0.514296		0.568397	0.553423	5	-0.724519	0.219935	0.000904901	true	true	wrong	true	wrong	wrong	wrong	wrong		0.712973	0.649207	0.720012		0.643982	0.658315	5	-0.564658	0.0773781	4.12775e-05	true	true	wrong	true	wrong	wrong	wrong	wrong		1.18554	1.249	0.712181		1.05643	0.718652	5	-0.0641603	0.392381
P35249	RFC4	Replication factor C subunit 4 OS=Homo sapiens GN=RFC4 PE=1 SV=2 - [RFC4_HUMAN]		0.779102	0.459936	0.793148	0.619888	0.294043	5	-0.854154	0.600724	0.0167771	true	true	wrong	wrong	wrong	wrong	wrong	wrong			0.919778	0.560665	0.673012	0.521202	0.581333	5	-0.649875	0.324917	0.00552703	true	true	wrong	wrong	wrong	wrong	wrong	wrong			1.00984	0.752464	1.31056	1.30569	0.616694	5	-0.0637112	0.483453
Q14103	HNRNPD	Heterogeneous nuclear ribonucleoprotein D0 OS=Homo sapiens GN=HNRNPD PE=1 SV=1 - [HNRPD_HUMAN]	0.682313	0.571208	0.60838	0.598123	0.175251	0.530584	6	-1.04078	0.730756	0.00874741	true	true	wrong	wrong	wrong	wrong	wrong	wrong		0.62171	0.554329	0.6772	0.583512	0.343616	0.716872	6	-0.816288	0.380167	0.00165011	true	true	wrong	true	wrong	wrong	wrong	wrong		1.33943	1.53665	0.841319	1.16768	0.607397	0.628659	6	-0.0621943	0.568621
P62263	RPS14	40S ribosomal protein S14 OS=Homo sapiens GN=RPS14 PE=1 SV=3 - [RS14_HUMAN]	0.495339	0.682741	0.720209	0.452747	0.628587	0.669158	6	-0.738372	0.273837	0.000598162	true	true	wrong	true	wrong	wrong	wrong	wrong		0.692021	0.785405	0.380167	0.680636	0.780715	0.336378	6	-0.793153	0.54445	0.00803539	true	true	wrong	wrong	wrong	wrong	wrong	wrong		0.746894	0.885038	1.4489	0.690777	0.852724	1.37236	6	-0.0615264	0.451216
O14776	TCERG1	Transcription elongation regulator 1 OS=Homo sapiens GN=TCERG1 PE=1 SV=2 - [TCRG1_HUMAN]				0.474719	0.46146	0.671119	3	-0.921979	0.300876	0.0168568	true	true	wrong	wrong	wrong	wrong	wrong	wrong					0.486829	0.511592	0.413501	3	-1.09316	0.16068	0.00356242	true	true	wrong	true	wrong	wrong	wrong	wrong					0.832149	0.911236	1.16877	3	-0.0580679	0.25373
Q9H6Z4	RANBP3	Ran-binding protein 3 OS=Homo sapiens GN=RANBP3 PE=1 SV=1 - [RANB3_HUMAN]	1.508						1	0.592638	n.a.	n.a.	true	wrong	wrong	wrong	wrong	wrong	wrong	wrong		1.1418						1	0.191305	n.a.	n.a.	true	wrong	wrong	wrong	wrong	wrong	wrong	wrong		0.834326		1.10734				2	-0.0571123	0.288789
P16152	CBR1	Carbonyl reductase [NADPH] 1 OS=Homo sapiens GN=CBR1 PE=1 SV=3 - [CBR1_HUMAN]	0.624214	0.804383	0.948171	0.560945	0.711226	1.05271	6	-0.387048	0.349509	0.0210732	true	true	wrong	wrong	wrong	wrong	wrong	wrong		0.606019	0.746255	0.658686	0.647994	0.773229	0.684102	6	-0.548643	0.131626	7.73606e-05	true	true	wrong	true	wrong	wrong	wrong	wrong		1.0148	1.02724	1.08724	0.803708	0.922256	0.946275	6	-0.0551757	0.153372
Q8NI27	THOC2	THO complex subunit 2 OS=Homo sapiens GN=THOC2 PE=1 SV=2 - [THOC2_HUMAN]	0.596117	0.551	0.774649	0.568366	0.358762	0.874284	6	-0.743738	0.447738	0.00482242	true	true	wrong	true	wrong	wrong	wrong	wrong		0.900464	0.780184	0.515853	1.22604	0.699923	0.481106	6	-0.456773	0.505344	0.0388534	true	true	wrong	wrong	wrong	wrong	wrong	wrong		0.853821	0.905825	1.60566	0.584099	0.654595	1.68089	6	-0.0542224	0.641594
O95470	SGPL1	Sphingosine-1-phosphate lyase 1 OS=Homo sapiens GN=SGPL1 PE=1 SV=3 - [SGPL1_HUMAN]					1.15008		1	0.201731	n.a.	n.a.	true	wrong	wrong	wrong	wrong	wrong	wrong	wrong						1.14128		1	0.190652	n.a.	n.a.	true	wrong	wrong	wrong	wrong	wrong	wrong	wrong						0.96382		1	-0.053165	n.a.
Q15365	PCBP1	Poly(rC)-binding protein 1 OS=Homo sapiens GN=PCBP1 PE=1 SV=2 - [PCBP1_HUMAN]	0.67035	0.736361	0.535662	0.602661	0.442669	0.578893	6	-0.769008	0.256396	0.000366632	true	true	wrong	true	wrong	wrong	wrong	wrong		0.674373	0.634144	0.748038	0.780899	0.613866	0.60654	6	-0.571073	0.152811	0.000130383	true	true	wrong	true	wrong	wrong	wrong	wrong		1.27408	1.40649	0.66396	0.84333	0.852573	0.944686	6	-0.0512171	0.404412
Q9BQ39	DDX50	ATP-dependent RNA helicase DDX50 OS=Homo sapiens GN=DDX50 PE=1 SV=1 - [DDX50_HUMAN]	0.504049		0.324968		0.291396	0.496411	4	-1.34983	0.409834	0.00355982	true	true	wrong	true	wrong	wrong	wrong	wrong		0.602948		0.260902	0.619355	0.478306	0.253403	5	-1.28079	0.636438	0.00541146	true	true	wrong	wrong	wrong	wrong	wrong	wrong		1.05735		1.2107	0.475756	0.798437	1.72364	5	-0.0509399	0.696517
Q96NY9	MUS81	Crossover junction endonuclease MUS81 OS=Homo sapiens GN=MUS81 PE=1 SV=3 - [MUS81_HUMAN]		0.444536					1	-1.16963	n.a.	n.a.	true	wrong	wrong	wrong	wrong	wrong	wrong	wrong			0.45139					1	-1.14756	n.a.	n.a.	true	wrong	wrong	wrong	wrong	wrong	wrong	wrong			0.966968					1	-0.0484606	n.a.
P62910	RPL32	60S ribosomal protein L32 OS=Homo sapiens GN=RPL32 PE=1 SV=2 - [RL32_HUMAN]		0.98425	1.1181	0.657162	1.01866		4	-0.110215	0.339328	0.281124	true	true	wrong	wrong	wrong	wrong	wrong	wrong		0.658336	1.1383	0.483461	0.53071	1.19273		5	-0.424898	0.611441	0.0975905	true	true	wrong	wrong	wrong	wrong	wrong	wrong			0.850888	1.74651	0.719689	0.81999		4	-0.0473403	0.577252
Q9UJV9	DDX41	Probable ATP-dependent RNA helicase DDX41 OS=Homo sapiens GN=DDX41 PE=1 SV=2 - [DDX41_HUMAN]					0.163413		1	-2.6134	n.a.	n.a.	true	wrong	wrong	wrong	wrong	wrong	wrong	wrong						0.30771	0.271352	2	-1.79106	0.128271	0.0161059	true	wrong	wrong	wrong	wrong	wrong	wrong	wrong						0.968673		1	-0.0459183	n.a.
O75419	CDC45	Cell division control protein 45 homolog OS=Homo sapiens GN=CDC45 PE=1 SV=1 - [CDC45_HUMAN]					0.449436		1	-1.15381	n.a.	n.a.	true	wrong	wrong	wrong	wrong	wrong	wrong	wrong						0.436361		1	-1.19641	n.a.	n.a.	true	wrong	wrong	wrong	wrong	wrong	wrong	wrong					0.875528	1.07192		2	-0.0457901	0.206453
P35221	CTNNA1	Catenin alpha-1 OS=Homo sapiens GN=CTNNA1 PE=1 SV=1 - [CTNA1_HUMAN]	1.33751	1.22812				0.720066	3	0.0807337	0.484167	0.399953	true	true	wrong	wrong	wrong	wrong	wrong	wrong		0.686395	0.790101				1.08582	3	-0.254663	0.338973	0.161447	true	true	wrong	wrong	wrong	wrong	wrong	wrong		1.75381	1.52364				0.340327	3	-0.0456664	1.31106
P11413	G6PD	Glucose-6-phosphate 1-dehydrogenase OS=Homo sapiens GN=G6PD PE=1 SV=4 - [G6PD_HUMAN]							0	n.a.	n.a.	n.a.	true	wrong	wrong	wrong	wrong	wrong	wrong	wrong								0	n.a.	n.a.	n.a.	true	wrong	wrong	wrong	wrong	wrong	wrong	wrong					0.969387			1	-0.044855	n.a.
P22455	FGFR4	Fibroblast growth factor receptor 4 OS=Homo sapiens GN=FGFR4 PE=1 SV=2 - [FGFR4_HUMAN]		1.20649		2.5924			2	0.822555	0.780268	0.188066	true	wrong	wrong	wrong	wrong	wrong	true	wrong			0.554472					1	-0.850813	n.a.	n.a.	true	wrong	wrong	wrong	wrong	wrong	true	wrong			0.970363					1	-0.0434029	n.a.
P09769	FGR	Tyrosine-protein kinase Fgr OS=Homo sapiens GN=FGR PE=1 SV=2 - [FGR_HUMAN]		1.20649		2.5924			2	0.822555	0.780268	0.188066	true	wrong	wrong	wrong	wrong	wrong	wrong	wrong			0.554472					1	-0.850813	n.a.	n.a.	true	wrong	wrong	wrong	wrong	wrong	wrong	wrong			0.970363					1	-0.0434029	n.a.
P21802	FGFR2	Fibroblast growth factor receptor 2 OS=Homo sapiens GN=FGFR2 PE=1 SV=1 - [FGFR2_HUMAN]		1.20649		2.5924			2	0.822555	0.780268	0.188066	true	wrong	wrong	wrong	wrong	wrong	wrong	wrong			0.554472					1	-0.850813	n.a.	n.a.	true	wrong	wrong	wrong	wrong	wrong	wrong	wrong			0.970363					1	-0.0434029	n.a.
P11362	FGFR1	Fibroblast growth factor receptor 1 OS=Homo sapiens GN=FGFR1 PE=1 SV=3 - [FGFR1_HUMAN]		1.20649		2.5924			2	0.822555	0.780268	0.188066	true	wrong	wrong	wrong	wrong	wrong	wrong	wrong			0.554472					1	-0.850813	n.a.	n.a.	true	wrong	wrong	wrong	wrong	wrong	wrong	wrong			0.970363					1	-0.0434029	n.a.
Q6P1J9	CDC73	Parafibromin OS=Homo sapiens GN=CDC73 PE=1 SV=1 - [CDC73_HUMAN]	0.659512	0.766407	0.690261	0.611087	0.607302	0.879388	6	-0.522438	0.206527	0.000798828	true	true	wrong	true	wrong	wrong	wrong	wrong		0.763693	0.601977	0.574162	0.742038	0.656274	0.588768	6	-0.620653	0.176318	0.00017318	true	true	wrong	true	wrong	wrong	wrong	wrong		0.959339	1.127	1.02456	0.785691	0.940873	1.01997	6	-0.0432931	0.174896
P51610	HCFC1	Host cell factor 1 OS=Homo sapiens GN=HCFC1 PE=1 SV=2 - [HCFC1_HUMAN]	0.317078	0.213291	0.380362		0.209487	0.31661	5	-1.83901	0.383481	0.000214316	true	true	wrong	true	wrong	wrong	wrong	wrong		0.539906	0.407517	0.31088		0.389797	0.279173	5	-1.41397	0.370277	0.000516215	true	true	wrong	true	wrong	wrong	wrong	wrong		0.86227	0.814841	1.44068		0.735276	1.16179	5	-0.0419479	0.401643
Q8N1G4	LRRC47	Leucine-rich repeat-containing protein 47 OS=Homo sapiens GN=LRRC47 PE=1 SV=1 - [LRC47_HUMAN]	0.730745	1.22165	1.05132	0.57169	0.927702	0.712189	6	-0.249361	0.405614	0.096222	true	true	wrong	wrong	wrong	wrong	wrong	wrong		0.738435	0.800527	0.752618	0.75247	0.822248	0.59712	6	-0.434167	0.163072	0.000633705	true	true	wrong	true	wrong	wrong	wrong	wrong		0.99174	1.36169	0.996218	0.694747	1.12729	0.798173	6	-0.0416388	0.34638
O00571	DDX3X	ATP-dependent RNA helicase DDX3X OS=Homo sapiens GN=DDX3X PE=1 SV=3 - [DDX3X_HUMAN]	0.918132	1.16572	1.03151	0.910495	1.46496	0.513676	6	-0.0671247	0.50685	0.379384	true	true	wrong	wrong	wrong	wrong	wrong	wrong		0.712465	0.847413	0.794826	0.711887	1.06333	0.793341	6	-0.299157	0.213933	0.00936531	true	true	wrong	wrong	wrong	wrong	wrong	wrong		1.26316	1.34782	0.875814	1.18356	1.16907	0.408137	6	-0.0413367	0.649122
Q96BN2	TADA1	Transcriptional adapter 1 OS=Homo sapiens GN=TADA1 PE=1 SV=1 - [TADA1_HUMAN]			0.818539			0.653946	2	-0.450817	0.229017	0.109772	true	wrong	wrong	wrong	wrong	wrong	wrong	wrong				0.642409			0.453034	2	-0.890372	0.356293	0.0877735	true	wrong	wrong	wrong	wrong	wrong	wrong	wrong				0.958912			0.987754	2	-0.0391533	0.0302311
Q04917	YWHAH	14-3-3 protein eta OS=Homo sapiens GN=YWHAH PE=1 SV=4 - [1433F_HUMAN]		1.59516	1.34146	1.12685	0.877293		4	0.270231	0.368211	0.119227	true	true	wrong	wrong	wrong	wrong	wrong	wrong			1.02745	1.70157		0.783239		3	0.151152	0.568028	0.345068	true	true	wrong	wrong	wrong	wrong	wrong	wrong			1.50085	0.586131		1.05643		3	-0.0352435	0.685444
Q9HB71	CACYBP	Calcyclin-binding protein OS=Homo sapiens GN=CACYBP PE=1 SV=2 - [CYBP_HUMAN]	0.897771	0.799952	0.767868	0.708237	0.948905	0.913597	6	-0.2604	0.165342	0.00595359	true	true	wrong	wrong	wrong	wrong	wrong	wrong		0.67972	0.669661	0.889444		0.742477	0.807911	5	-0.408365	0.172405	0.00305097	true	true	wrong	true	wrong	wrong	wrong	wrong		1.28593	1.16444	0.678602		1.21569	0.732599	5	-0.0288071	0.438613
Q8N163	KIAA1967	Protein KIAA1967 OS=Homo sapiens GN=KIAA1967 PE=1 SV=2 - [K1967_HUMAN]	0.716346	0.699833			0.778014	0.721908	4	-0.457108	0.0661188	0.000409402	true	true	wrong	true	wrong	wrong	wrong	wrong		0.787505	0.670062			0.645829	0.679462	4	-0.527646	0.125856	0.00177886	true	true	wrong	true	wrong	wrong	wrong	wrong		0.941746	0.997009			1.252	0.786393	4	-0.0283395	0.276656
Q9UI30	TRMT112	tRNA methyltransferase 112 homolog OS=Homo sapiens GN=TRMT112 PE=1 SV=1 - [TR112_HUMAN]	0.561538	0.815281	0.766506	0.504735	0.759828	0.671085	6	-0.578149	0.276658	0.00185537	true	true	wrong	true	wrong	wrong	wrong	wrong		0.616215	0.813235	0.410233	0.706959	0.800684	0.413306	6	-0.729657	0.450104	0.00531365	true	true	wrong	wrong	wrong	wrong	wrong	wrong		0.881355	0.969003	1.3862	0.707354	0.849018	1.25179	6	-0.0280214	0.364074
Q9P2J5	LARS	Leucine--tRNA ligase, cytoplasmic OS=Homo sapiens GN=LARS PE=1 SV=2 - [SYLC_HUMAN]	0.641362	0.642073	0.654227		0.555043	0.630492	5	-0.681379	0.0957633	4.56111e-05	true	true	wrong	true	wrong	wrong	wrong	wrong		0.67972	0.675251	0.608981		0.647347	0.53052	5	-0.676187	0.147454	0.000254976	true	true	wrong	true	wrong	wrong	wrong	wrong		1.13916	1.00984	0.93764		0.933309	0.911635	5	-0.0247667	0.131173
Q2NL82	TSR1	Pre-rRNA-processing protein TSR1 homolog OS=Homo sapiens GN=TSR1 PE=1 SV=1 - [TSR1_HUMAN]	0.55863	0.768041	0.703188		0.703177	0.543041	5	-0.623541	0.222891	0.00166532	true	true	wrong	true	wrong	wrong	wrong	wrong		0.668174	0.870601	0.530643		0.79396	0.454819	5	-0.63306	0.391468	0.0112179	true	true	wrong	wrong	wrong	wrong	wrong	wrong		0.808778	1.03149	1.23639		0.917531	0.988245	5	-0.0193096	0.225451
A6NJ78	METTL15	Probable methyltransferase-like protein 15 OS=Homo sapiens GN=METTL15 PE=2 SV=1 - [MET15_HUMAN]	0.461618	0.450594	0.413151				3	-1.1802	0.0841523	0.00084522	true	true	wrong	true	wrong	wrong	wrong	wrong		0.54541	0.553797	0.262363				3	-1.21917	0.616007	0.0377885	true	true	wrong	wrong	wrong	wrong	wrong	wrong		0.890637	0.855051	1.26849				3	-0.0166319	0.312934
P78347	GTF2I	General transcription factor II-I OS=Homo sapiens GN=GTF2I PE=1 SV=2 - [GTF2I_HUMAN]	0.563113	0.538055	0.497705		0.548067	0.404921	5	-0.980236	0.192891	0.000171007	true	true	wrong	true	wrong	wrong	true	wrong		0.509241	0.453835	0.469736		0.49103	0.48051	5	-1.05738	0.0629592	1.50123e-06	true	true	wrong	true	wrong	wrong	true	wrong		1.24686	1.1963	0.812592		1.1369	0.68743	5	-0.0156253	0.381848
P31150	GDI1	Rab GDP dissociation inhibitor alpha OS=Homo sapiens GN=GDI1 PE=1 SV=2 - [GDIA_HUMAN]						0.0747415	1	-3.74195	n.a.	n.a.	true	wrong	wrong	wrong	wrong	wrong	wrong	wrong							5.45199	1	2.44678	n.a.	n.a.	true	wrong	true	wrong	wrong	wrong	wrong	wrong					3.35471		0.29214	2	-0.0145391	2.49004
P28161	GSTM2	Glutathione S-transferase Mu 2 OS=Homo sapiens GN=GSTM2 PE=1 SV=2 - [GSTM2_HUMAN]						0.40571	1	-1.30148	n.a.	n.a.	true	wrong	wrong	wrong	wrong	wrong	wrong	wrong							8.88415	1	3.15123	n.a.	n.a.	true	wrong	true	wrong	wrong	wrong	wrong	wrong						2.51328	0.391004	2	-0.012587	1.8981
Q9Y6A4	C16orf80	UPF0468 protein C16orf80 OS=Homo sapiens GN=C16orf80 PE=1 SV=1 - [CP080_HUMAN]	0.581695		0.952542	0.492457	0.705046	0.926868	5	-0.497503	0.415014	0.0275996	true	true	wrong	wrong	wrong	wrong	wrong	wrong		0.764371		0.424976		1.00276	0.362887	4	-0.770157	0.692933	0.0563698	true	true	wrong	wrong	wrong	wrong	wrong	wrong		0.633383		1.54091		0.615633	1.61343	4	-0.0112	0.772174
P28074	PSMB5	Proteasome subunit beta type-5 OS=Homo sapiens GN=PSMB5 PE=1 SV=3 - [PSB5_HUMAN]	0.682042					0.417388	2	-0.906304	0.500966	0.118603	true	wrong	wrong	wrong	wrong	wrong	wrong	wrong		0.355865			0.203647		0.400111	3	-1.70266	0.520631	0.0148904	true	true	wrong	wrong	wrong	wrong	wrong	wrong		1.61238					0.611477	2	-0.0102204	0.989114
P35251	RFC1	Replication factor C subunit 1 OS=Homo sapiens GN=RFC1 PE=1 SV=4 - [RFC1_HUMAN]	0.575276	0.421854	0.612424		0.363994		4	-1.05207	0.358515	0.00493306	true	true	wrong	true	wrong	wrong	wrong	wrong		0.512996	0.510114	0.431912		0.484004		4	-1.04805	0.115141	0.000180803	true	true	wrong	true	wrong	wrong	wrong	wrong		1.20196	0.886001	1.16562		0.786564		4	-0.00862293	0.299712
Q6NZY4	ZCCHC8	Zinc finger CCHC domain-containing protein 8 OS=Homo sapiens GN=ZCCHC8 PE=1 SV=2 - [ZCHC8_HUMAN]	0.262236	0.198514	0.566787		0.18306	0.427886	5	-1.75144	0.707853	0.00260767	true	true	wrong	true	wrong	wrong	wrong	wrong		0.288117	0.27877	0.160481		0.30892	0.132737	5	-2.17714	0.558154	0.000475902	true	true	wrong	true	wrong	wrong	wrong	wrong		0.89587	0.559276	2.06146		0.485994	1.94449	5	-0.00698652	0.977385
P02786	TFRC	Transferrin receptor protein 1 OS=Homo sapiens GN=TFRC PE=1 SV=2 - [TFR1_HUMAN]	1.14415		1.0343	0.854549	1.10983	0.95163	5	0.0189949	0.171353	0.408218	true	true	wrong	wrong	wrong	wrong	wrong	wrong		0.919592		1.11743	0.867703	0.886546	1.18907	5	-0.0178754	0.208086	0.428516	true	true	wrong	wrong	wrong	wrong	wrong	wrong		1.41458		0.769393	1.13881	1.37513	0.583053	5	-0.00180661	0.558015
Q96A65	EXOC4	Exocyst complex component 4 OS=Homo sapiens GN=EXOC4 PE=1 SV=1 - [EXOC4_HUMAN]	0.233072	0.247914	0.233924		0.153208	0.258197	5	-2.1738	0.304036	4.4746e-05	true	true	wrong	true	wrong	wrong	wrong	wrong		0.406587	0.342401	0.240303		0.29071	0.192132	5	-1.81277	0.423621	0.000333227	true	true	wrong	true	wrong	wrong	wrong	wrong		0.871231	0.903035	1.13643		0.782585	1.42401	5	-0.00104753	0.346548
O15397	IPO8	Importin-8 OS=Homo sapiens GN=IPO8 PE=1 SV=2 - [IPO8_HUMAN]		0.645659			0.322563	0.272713	3	-1.37935	0.659174	0.0342033	true	true	wrong	wrong	wrong	wrong	wrong	wrong			0.379426			0.378781	0.284181	3	-1.53793	0.240055	0.00401184	true	true	wrong	true	wrong	wrong	wrong	wrong			1.73595			0.847959	0.681052	3	0.00121126	0.706006
Q9NXR1	NDE1	Nuclear distribution protein nudE homolog 1 OS=Homo sapiens GN=NDE1 PE=1 SV=2 - [NDE1_HUMAN]		0.42513					1	-1.23403	n.a.	n.a.	true	wrong	wrong	wrong	wrong	wrong	wrong	wrong			0.417141					1	-1.26139	n.a.	n.a.	true	wrong	wrong	wrong	wrong	wrong	wrong	wrong			1.00119					1	0.00172139	n.a.
Q9UJC3	HOOK1	Protein Hook homolog 1 OS=Homo sapiens GN=HOOK1 PE=1 SV=2 - [HOOK1_HUMAN]	0.468112	0.401839	0.531181				3	-1.1077	0.20159	0.00543023	true	true	wrong	wrong	wrong	wrong	wrong	wrong		0.514587	0.47372	0.484812				3	-1.02697	0.0615912	0.000598398	true	true	wrong	true	wrong	wrong	wrong	wrong		1.05393	0.982296	0.974045				3	0.00402295	0.06244
Q5T1J5	CHCHD2P9	Putative coiled-coil-helix-coiled-coil-helix domain-containing protein CHCHD2P9, mitochondrial OS=Homo sapiens GN=CHCHD2P9 PE=5 SV=1 - [CHCH9_HUMAN]	0.300103			0.228617			2	-1.93273	0.277557	0.0322129	true	wrong	wrong	wrong	wrong	wrong	wrong	wrong		0.273808			0.222958			2	-2.01696	0.209582	0.023346	true	wrong	wrong	wrong	wrong	wrong	wrong	wrong		1.07486			0.936899			2	0.00505917	0.140141
P35658	NUP214	Nuclear pore complex protein Nup214 OS=Homo sapiens GN=NUP214 PE=1 SV=2 - [NU214_HUMAN]	0.313609			0.391469	0.303336	0.551695	4	-1.40127	0.397266	0.00292736	true	true	wrong	true	wrong	wrong	true	wrong		0.348842			0.542207	0.39498	0.118101	4	-1.70612	0.955509	0.018761	true	true	wrong	wrong	wrong	wrong	true	wrong		0.8245			0.617675	0.688312	2.8962	4	0.0054518	1.03353
Q9Y5B9	SUPT16H	FACT complex subunit SPT16 OS=Homo sapiens GN=SUPT16H PE=1 SV=1 - [SP16H_HUMAN]	1.17959				0.267002		2	-0.833396	1.51559	0.289608	true	wrong	wrong	wrong	wrong	wrong	wrong	wrong		0.338258						1	-1.56381	n.a.	n.a.	true	wrong	wrong	wrong	wrong	wrong	wrong	wrong		2.52819				0.398921		2	0.00613975	1.88368
P17844	DDX5	Probable ATP-dependent RNA helicase DDX5 OS=Homo sapiens GN=DDX5 PE=1 SV=1 - [DDX5_HUMAN]	0.884544	1.08513	1.08528	0.840226	1.06511	1.08982	6	0.00381377	0.17078	0.479248	true	true	wrong	wrong	wrong	wrong	wrong	wrong		0.910648	1.05105	0.672688	0.916562	1.15806	0.584951	6	-0.220465	0.378955	0.106731	true	true	wrong	wrong	wrong	wrong	wrong	wrong		0.954227	0.961038	1.1884	0.884645	0.870076	1.23065	6	0.00764973	0.214828
Q9Y399	MRPS2	28S ribosomal protein S2, mitochondrial OS=Homo sapiens GN=MRPS2 PE=1 SV=1 - [RT02_HUMAN]						1.87245	1	0.90493	n.a.	n.a.	true	wrong	wrong	wrong	wrong	wrong	wrong	wrong							23.8067	1	4.5733	n.a.	n.a.	true	wrong	true	wrong	wrong	wrong	wrong	wrong							1.00533	1	0.00766877	n.a.
Q92733	PRCC	Proline-rich protein PRCC OS=Homo sapiens GN=PRCC PE=1 SV=1 - [PRCC_HUMAN]	0.497118	0.473678				0.220481	3	-1.42254	0.658	0.0322475	true	true	wrong	wrong	wrong	wrong	wrong	wrong		0.474312	0.361415				0.57022	3	-1.11826	0.330951	0.0139883	true	true	wrong	wrong	wrong	wrong	wrong	wrong		1.46963	1.83868				0.37788	3	0.0100413	1.23521
Q9Y266	NUDC	Nuclear migration protein nudC OS=Homo sapiens GN=NUDC PE=1 SV=1 - [NUDC_HUMAN]		0.944761				0.74844	2	-0.25001	0.237633	0.188361	true	wrong	wrong	wrong	wrong	wrong	wrong	wrong			0.67049				0.823912	2	-0.428076	0.210205	0.106378	true	wrong	wrong	wrong	wrong	wrong	wrong	wrong			2.33658				0.434267	2	0.0105254	1.71667
O75369	FLNB	Filamin-B OS=Homo sapiens GN=FLNB PE=1 SV=2 - [FLNB_HUMAN]	0.724468	0.354605	0.625997	0.729893	0.398911	0.811192	6	-0.786414	0.500952	0.00602923	true	true	wrong	wrong	wrong	wrong	wrong	wrong		0.826344	0.68075	0.484577	0.89358	0.618116	0.342111	6	-0.713173	0.515168	0.00972063	true	true	wrong	wrong	wrong	wrong	wrong	wrong		1.05415	0.65444	1.16206	0.858626	0.733144	2.07196	6	0.0107268	0.596605
P12814	ACTN1	Alpha-actinin-1 OS=Homo sapiens GN=ACTN1 PE=1 SV=2 - [ACTN1_HUMAN]	4.55571	4.23546	1.47979		3.07244	0.532089	5	1.10894	1.29853	0.0644027	true	true	true	wrong	wrong	wrong	wrong	wrong		1.71058	2.67684	3.04275		1.27747	1.78649	5	0.998162	0.50964	0.00593987	true	true	wrong	wrong	wrong	wrong	wrong	wrong		1.75315	2.07011	0.52184		3.07016	0.179151	5	0.0117793	1.68899
Q9UHI6	DDX20	Probable ATP-dependent RNA helicase DDX20 OS=Homo sapiens GN=DDX20 PE=1 SV=2 - [DDX20_HUMAN]	0.489433	0.487805	0.674589		0.492771	0.544826	5	-0.9063	0.200498	0.000269596	true	true	wrong	true	wrong	wrong	wrong	wrong		0.677668	0.656371	0.434329		0.613935	0.366283	5	-0.904943	0.397462	0.00351305	true	true	wrong	true	wrong	wrong	wrong	wrong		0.797206	0.820315	1.31399		0.864645	1.41506	5	0.0144523	0.39925
O75190	DNAJB6	DnaJ homolog subfamily B member 6 OS=Homo sapiens GN=DNAJB6 PE=1 SV=2 - [DNJB6_HUMAN]	0.696747	0.649523	0.714583	0.412347	0.604146	0.670197	6	-0.701852	0.294671	0.00104598	true	true	wrong	true	wrong	wrong	wrong	wrong		0.867994	0.70135	0.385189	0.541206	0.77367	0.342512	6	-0.815688	0.55081	0.00755067	true	true	wrong	wrong	wrong	wrong	wrong	wrong		0.863948	0.93078	1.50913	0.765424	0.772357	1.48207	6	0.0147539	0.450825
P39656	DDOST	Dolichyl-diphosphooligosaccharide--protein glycosyltransferase 48 kDa subunit OS=Homo sapiens GN=DDOST PE=1 SV=4 - [OST48_HUMAN]	0.760772	0.832427		0.716952	0.77466	0.637408	5	-0.431439	0.144209	0.00129837	true	true	wrong	true	wrong	wrong	wrong	wrong		0.759938	0.739536		0.761219	0.721206	0.699666	5	-0.44235	0.0518058	2.21682e-05	true	true	wrong	true	wrong	wrong	wrong	wrong		1.10434	1.23995		0.968068	1.15328	0.690803	5	0.0157466	0.333483
Q9UHX1	PUF60	Poly(U)-binding-splicing factor PUF60 OS=Homo sapiens GN=PUF60 PE=1 SV=1 - [PUF60_HUMAN]		0.154442		0.340756	0.234656	0.377041	4	-1.93666	0.584861	0.00350593	true	true	wrong	true	wrong	wrong	wrong	wrong			0.217916		0.298023	0.228934	0.178981	4	-2.13845	0.303	0.000385117	true	true	wrong	true	wrong	wrong	wrong	wrong			0.692659		1.0371	0.927477	1.57154	4	0.0165828	0.489717
O75182	SIN3B	Paired amphipathic helix protein Sin3b OS=Homo sapiens GN=SIN3B PE=1 SV=2 - [SIN3B_HUMAN]	0.474527	0.303002	0.685743		0.275127	0.55826	5	-1.20902	0.566815	0.00442146	true	true	wrong	true	wrong	wrong	wrong	wrong		0.682149	0.542889	0.247744		0.529151	0.203547	5	-1.3322	0.770916	0.00904205	true	true	wrong	wrong	wrong	wrong	wrong	wrong		0.698688	0.572332	2.21262		0.584449	2.05022	5	0.0168655	0.987458
P54886	ALDH18A1	Delta-1-pyrroline-5-carboxylate synthase OS=Homo sapiens GN=ALDH18A1 PE=1 SV=2 - [P5CS_HUMAN]	0.729846	0.82312	0.646458	0.656973	0.774921	0.74692	6	-0.459913	0.135775	0.000207632	true	true	wrong	true	wrong	wrong	wrong	wrong		0.621663	0.59793	0.824752	0.774735	0.797583	0.761559	6	-0.465534	0.197091	0.0010855	true	true	wrong	true	wrong	wrong	wrong	wrong		1.3269	1.60236	0.643661	0.968367	1.09907	0.739151	6	0.0177473	0.498435
Q9UNQ2	DIMT1	Probable dimethyladenosine transferase OS=Homo sapiens GN=DIMT1 PE=1 SV=1 - [DIM1_HUMAN]	0.451498		0.745433	0.373286	0.414652	0.711885	5	-0.950603	0.461501	0.00499333	true	true	wrong	true	wrong	wrong	wrong	wrong		0.461446		0.331181	0.464099	0.535914	0.252288	5	-1.34087	0.441898	0.00123171	true	true	wrong	true	wrong	wrong	wrong	wrong		0.846019		1.75198	0.608104	0.666405	1.77322	5	0.0181958	0.750283
P47755	CAPZA2	F-actin-capping protein subunit alpha-2 OS=Homo sapiens GN=CAPZA2 PE=1 SV=3 - [CAZA2_HUMAN]	0.752566		0.986018	0.794686	0.833877	0.672	5	-0.319506	0.203508	0.0123292	true	true	wrong	wrong	wrong	wrong	wrong	wrong		0.706229		0.683347	0.756838	0.795527	0.573489	5	-0.517045	0.180827	0.0015361	true	true	wrong	true	wrong	wrong	wrong	wrong		1.10253		1.14482	1.01306	1.05812	0.789551	5	0.0190523	0.211712
O00303	EIF3F	Eukaryotic translation initiation factor 3 subunit F OS=Homo sapiens GN=EIF3F PE=1 SV=1 - [EIF3F_HUMAN]	1.07457	1.05908	1.04307			0.715007	4	-0.059142	0.283761	0.352412	true	true	wrong	wrong	wrong	wrong	wrong	wrong		1.59693	1.02305	1.57725			1.13667	4	0.387603	0.327882	0.0495074	true	true	wrong	wrong	wrong	wrong	wrong	wrong		1.1734	1.52716	0.855264			0.687903	4	0.019068	0.505664
Q96MN5	TCEANC2	Transcription elongation factor A N-terminal and central domain-containing protein 2 OS=Homo sapiens GN=TCEANC2 PE=1 SV=1 - [TEAN2_HUMAN]			1.24562		1.32001	1.71904	3	0.499672	0.247719	0.0365309	true	true	wrong	wrong	wrong	wrong	wrong	wrong				0.694244		3.19412	0.947366	3	0.356975	1.16362	0.32414	true	true	wrong	wrong	wrong	wrong	wrong	wrong				1.49201		0.512953	1.36477	3	0.0209381	0.854626
Q6P2E9	EDC4	Enhancer of mRNA-decapping protein 4 OS=Homo sapiens GN=EDC4 PE=1 SV=1 - [EDC4_HUMAN]		0.603897				0.431932	2	-0.969375	0.341885	0.0777953	true	wrong	wrong	wrong	wrong	wrong	wrong	wrong			0.659066				0.333375	2	-1.09314	0.695283	0.134532	true	wrong	wrong	wrong	wrong	wrong	wrong	wrong			1.02308				1.00773	2	0.0220155	0.0154141
Q5T9A4	ATAD3B	ATPase family AAA domain-containing protein 3B OS=Homo sapiens GN=ATAD3B PE=1 SV=1 - [ATD3B_HUMAN]	0.625386	0.72977	0.705238	0.640822	0.626995	1.09828	6	-0.469287	0.310357	0.00697187	true	true	wrong	wrong	wrong	wrong	wrong	wrong		0.809046	0.704224	0.589242	0.74116	1.01555	0.443233	6	-0.526403	0.408473	0.0125945	true	true	wrong	wrong	wrong	wrong	wrong	wrong		0.830331	1.12874	1.0025	0.878485	0.65649	2.03789	6	0.0238468	0.558129
P42766	RPL35	60S ribosomal protein L35 OS=Homo sapiens GN=RPL35 PE=1 SV=2 - [RL35_HUMAN]	0.474554	0.829171	1.07742	0.433778	0.799762	1.06692	6	-0.445318	0.568465	0.0565475	true	true	wrong	wrong	wrong	wrong	wrong	wrong		0.811022	1.10382	0.388827	0.828926	1.13854	0.338594	6	-0.528058	0.754334	0.0735295	true	true	wrong	wrong	wrong	wrong	wrong	wrong		0.657436	0.798162	2.43144	0.537164	0.706248	2.30926	6	0.0267658	0.961677
Q04837	SSBP1	Single-stranded DNA-binding protein, mitochondrial OS=Homo sapiens GN=SSBP1 PE=1 SV=1 - [SSBP_HUMAN]	1.23169	1.11456	0.509161	1.26282	1.20239	0.548174	6	-0.13024	0.616056	0.313328	true	true	wrong	wrong	wrong	wrong	wrong	wrong		1.00076	0.804727	1.14336	1.07051		1.66889	5	0.143626	0.38343	0.224694	true	true	wrong	wrong	wrong	wrong	wrong	wrong		1.6218	1.82468	0.450419	1.44953		0.568661	5	0.0271593	0.936723
Q13347	EIF3I	Eukaryotic translation initiation factor 3 subunit I OS=Homo sapiens GN=EIF3I PE=1 SV=1 - [EIF3I_HUMAN]		0.96531		0.849736	0.780607	0.855187	4	-0.217217	0.126051	0.0205205	true	true	wrong	wrong	wrong	wrong	wrong	wrong			10.1659		0.627176	0.663805	1.36493	4	0.632566	1.87944	0.274536	true	true	wrong	wrong	wrong	wrong	wrong	wrong			0.182415		1.56003	4.2295	0.897123	4	0.0276837	1.89623
Q31612	HLA-B	HLA class I histocompatibility antigen, B-73 alpha chain OS=Homo sapiens GN=HLA-B PE=1 SV=1 - [1B73_HUMAN]	0.555296	0.550394					2	-0.855067	0.00904506	0.00238088	true	wrong	wrong	true	wrong	wrong	wrong	wrong		0.509241	0.553504	0.512049				3	-0.930854	0.0672516	0.00086768	true	true	wrong	true	wrong	wrong	wrong	wrong		1.06842	0.975227					2	0.0296435	0.0931036
P07197	NEFM	Neurofilament medium polypeptide OS=Homo sapiens GN=NEFM PE=1 SV=3 - [NFM_HUMAN]	0.853039	0.763679		0.646572	0.652944	0.756033	5	-0.453168	0.1687	0.00193343	true	true	wrong	true	wrong	wrong	wrong	wrong		0.635293	0.821418		0.628148	0.67294	0.362348	5	-0.729029	0.439597	0.0103424	true	true	wrong	wrong	wrong	wrong	wrong	wrong		1.2409	0.858765		0.88756	0.87392	1.34213	5	0.0299466	0.311594
P17509	HOXB6	Homeobox protein Hox-B6 OS=Homo sapiens GN=HOXB6 PE=1 SV=4 - [HXB6_HUMAN]	0.403817	0.722526	1.07469		0.358931	0.634825	5	-0.761397	0.643893	0.0286662	true	true	wrong	wrong	wrong	wrong	wrong	wrong		0.846707	1.22828	0.531008		0.426328	0.382313	5	-0.694753	0.707673	0.0465728	true	true	wrong	wrong	wrong	wrong	wrong	wrong		0.598943	0.84744	1.94994		0.789662	1.4483	5	0.0357541	0.694141
P62316	SNRPD2	Small nuclear ribonucleoprotein Sm D2 OS=Homo sapiens GN=SNRPD2 PE=1 SV=1 - [SMD2_HUMAN]	0.730588	0.629956	0.53648	0.702358	0.456047	0.63657	6	-0.718671	0.255057	0.000489103	true	true	wrong	true	wrong	wrong	wrong	wrong		0.695441	0.596102	0.714414	0.569942	0.490405	0.621014	6	-0.713651	0.199109	0.000158991	true	true	wrong	true	wrong	wrong	wrong	wrong		1.2843	1.29119	0.703256	1.34958	1.05949	0.696375	6	0.0359386	0.443399
Q9UQN3	CHMP2B	Charged multivesicular body protein 2b OS=Homo sapiens GN=CHMP2B PE=1 SV=1 - [CHM2B_HUMAN]		0.391224	0.645702	0.323297		0.99792	4	-0.904265	0.733587	0.0452194	true	true	wrong	wrong	wrong	wrong	wrong	wrong			0.577412	0.581049	0.301056		0.643067	4	-0.986113	0.502262	0.0146973	true	true	wrong	wrong	wrong	wrong	wrong	wrong			0.781733	0.984644	1.1552		1.24695	4	0.0372404	0.297688
Q9UKK9	NUDT5	ADP-sugar pyrophosphatase OS=Homo sapiens GN=NUDT5 PE=1 SV=1 - [NUDT5_HUMAN]	0.932551		0.878352				2	-0.143937	0.0610819	0.0927947	true	wrong	wrong	wrong	wrong	wrong	wrong	wrong		1.09312		1.07199				2	0.114371	0.0199099	0.0389861	true	wrong	wrong	wrong	wrong	wrong	wrong	wrong		1.1964		0.88117				2	0.0380981	0.311983
Q8N983	MRPL43	39S ribosomal protein L43, mitochondrial OS=Homo sapiens GN=MRPL43 PE=1 SV=1 - [RM43_HUMAN]		1.06578					1	0.0919044	n.a.	n.a.	true	wrong	wrong	wrong	wrong	wrong	wrong	wrong			1.01432					1	0.0205089	n.a.	n.a.	true	wrong	wrong	wrong	wrong	wrong	wrong	wrong			1.02725					1	0.0387933	n.a.
P39748	FEN1	Flap endonuclease 1 OS=Homo sapiens GN=FEN1 PE=1 SV=1 - [FEN1_HUMAN]	0.946957	1.1854	0.822773	0.877382	1.01413	0.766927	6	-0.111002	0.225503	0.140928	true	true	wrong	wrong	wrong	wrong	wrong	wrong		0.872093	0.917255	0.826286	0.961212	0.737342	0.73986	6	-0.25478	0.158909	0.00555019	true	true	wrong	wrong	wrong	wrong	wrong	wrong		1.2035	1.40487	0.795672	0.847522	1.26031	0.820314	6	0.0395436	0.363682
P10768	ESD	S-formylglutathione hydrolase OS=Homo sapiens GN=ESD PE=1 SV=2 - [ESTD_HUMAN]					0.994102	1.85232	2	0.440398	0.634885	0.253054	true	wrong	wrong	wrong	wrong	wrong	wrong	wrong						2.10888	11.499	2	2.29996	1.73026	0.155617	true	wrong	true	wrong	wrong	wrong	wrong	wrong						2.083	0.507161	2	0.0395891	1.44119
Q9BQ67	GRWD1	Glutamate-rich WD repeat-containing protein 1 OS=Homo sapiens GN=GRWD1 PE=1 SV=1 - [GRWD1_HUMAN]	0.967322			0.764598	1.44306		3	0.0313242	0.463291	0.458737	true	true	wrong	wrong	wrong	wrong	wrong	wrong		0.847038			0.748675	1.27434		3	-0.102448	0.401608	0.350895	true	true	wrong	wrong	wrong	wrong	wrong	wrong		1.10978			0.912201	1.07352		3	0.040013	0.151375
P13797	PLS3	Plastin-3 OS=Homo sapiens GN=PLS3 PE=1 SV=4 - [PLST_HUMAN]				1.38643	2.06694	1.60285	3	0.733172	0.291628	0.024451	true	true	wrong	wrong	wrong	wrong	wrong	wrong					1.00142	1.01831	2.32041	3	0.414203	0.693079	0.204683	true	true	wrong	wrong	wrong	wrong	wrong	wrong					1.15727	1.8796	0.501541	3	0.0418633	0.964148
Q9H6D7	HAUS4	HAUS augmin-like complex subunit 4 OS=Homo sapiens GN=HAUS4 PE=1 SV=1 - [HAUS4_HUMAN]		0.201956					1	-2.30789	n.a.	n.a.	true	wrong	wrong	wrong	wrong	wrong	wrong	wrong			0.191792					1	-2.38239	n.a.	n.a.	true	wrong	wrong	wrong	wrong	wrong	wrong	wrong			1.03075					1	0.0437004	n.a.
P46779	RPL28	60S ribosomal protein L28 OS=Homo sapiens GN=RPL28 PE=1 SV=3 - [RL28_HUMAN]			0.82026	0.535271	0.7634	0.877784	4	-0.441264	0.317757	0.0345712	true	true	wrong	wrong	wrong	wrong	wrong	wrong				0.53312	0.780565	1.06974	0.435287	4	-0.591894	0.577135	0.0663091	true	true	wrong	wrong	wrong	wrong	wrong	wrong				1.26574	0.693768	0.747797	1.72421	4	0.0447896	0.626973
Q16637	SMN1	Survival motor neuron protein OS=Homo sapiens GN=SMN1 PE=1 SV=1 - [SMN_HUMAN]		0.475277	0.562407	0.415824	0.331031	0.588606	5	-1.1058	0.338485	0.000933751	true	true	wrong	true	wrong	wrong	wrong	wrong			0.769446	0.525053	0.320048	0.431759	0.43275	5	-1.07426	0.465474	0.00334765	true	true	wrong	true	wrong	wrong	wrong	wrong			0.812521	0.935975	1.40695	0.900157	1.22393	5	0.0474705	0.33098
Q99459	CDC5L	Cell division cycle 5-like protein OS=Homo sapiens GN=CDC5L PE=1 SV=2 - [CDC5L_HUMAN]	0.491329	0.479931	0.663985		0.497886	0.628181	5	-0.870396	0.221388	0.000461705	true	true	wrong	true	wrong	wrong	wrong	wrong		0.536251	0.519337	0.420583		0.574985	0.370862	5	-1.06465	0.265049	0.000425199	true	true	wrong	true	wrong	wrong	wrong	wrong		0.965005	0.884006	1.27054		0.933015	1.18186	5	0.0514413	0.228305
Q8TEX9	IPO4	Importin-4 OS=Homo sapiens GN=IPO4 PE=1 SV=2 - [IPO4_HUMAN]	0.551449	0.580703	0.559587		0.509554	0.330944	5	-1.00969	0.334537	0.00125654	true	true	wrong	true	wrong	wrong	wrong	wrong		0.51102	0.421669	0.650158		0.475793	0.473813	5	-0.996942	0.232408	0.000330123	true	true	wrong	true	wrong	wrong	wrong	wrong		1.2496	1.68267	0.786297		1.24335	0.582133	5	0.0518028	0.608667
Q9ULM3	YEATS2	YEATS domain-containing protein 2 OS=Homo sapiens GN=YEATS2 PE=1 SV=2 - [YETS2_HUMAN]	0.550325	0.458163	0.91283		0.4161		4	-0.846072	0.504855	0.0220009	true	true	wrong	wrong	wrong	wrong	wrong	wrong		0.653808	0.561067	0.27161		0.628187		4	-0.999486	0.594661	0.0218419	true	true	wrong	wrong	wrong	wrong	wrong	wrong		0.843676	0.818116	2.58437		0.647606		4	0.0520341	0.894887
Q71UM5	RPS27L	40S ribosomal protein S27-like OS=Homo sapiens GN=RPS27L PE=1 SV=3 - [RS27L_HUMAN]	0.655325	0.611462		0.639557	0.621643	0.768784	5	-0.605886	0.132302	0.000256309	true	true	wrong	true	wrong	wrong	wrong	wrong		0.589147	0.651294		0.659562	0.747173	0.361858	5	-0.773865	0.40587	0.00650878	true	true	wrong	wrong	wrong	wrong	wrong	wrong		1.12485	0.950078		0.914745	0.821094	1.49686	5	0.0529698	0.337747
P50750	CDK9	Cyclin-dependent kinase 9 OS=Homo sapiens GN=CDK9 PE=1 SV=3 - [CDK9_HUMAN]	0.73273	0.602567	1.42832	0.962386		0.8316	5	-0.197298	0.468798	0.199976	true	true	wrong	wrong	wrong	wrong	wrong	wrong		0.946387	0.838278	0.607807	1.26884		0.556791	5	-0.310719	0.483737	0.112134	true	true	wrong	wrong	wrong	wrong	wrong	wrong		0.847289	0.7863	1.97377	0.774184		1.18298	5	0.053643	0.574558
Q96KP1	EXOC2	Exocyst complex component 2 OS=Homo sapiens GN=EXOC2 PE=1 SV=1 - [EXOC2_HUMAN]	0.421192	0.378857	0.501844		0.365994		4	-1.27313	0.204675	0.000559649	true	true	wrong	true	wrong	wrong	wrong	wrong		0.511781	0.485004	0.383779		0.399129		4	-1.17926	0.204814	0.000702961	true	true	wrong	true	wrong	wrong	wrong	wrong		0.980642	0.931563	1.19395		1.06687		4	0.0546624	0.156446
O95757	HSPA4L	Heat shock 70 kDa protein 4L OS=Homo sapiens GN=HSPA4L PE=1 SV=3 - [HS74L_HUMAN]	0.776102	0.732289	0.668016		0.695726	0.469568	5	-0.602249	0.284779	0.00455601	true	true	wrong	true	wrong	wrong	wrong	wrong		0.777464	0.643259	0.812127		0.599274	0.701	5	-0.510226	0.182959	0.00168473	true	true	wrong	true	wrong	wrong	wrong	wrong		1.30205	1.48342	0.822987		1.33871	0.568088	5	0.0547362	0.586376
P23284	PPIB	Peptidyl-prolyl cis-trans isomerase B OS=Homo sapiens GN=PPIB PE=1 SV=2 - [PPIB_HUMAN]	1.36577	1.71232	1.02816	1.13931	1.68602	1.07752	6	0.385871	0.324815	0.0167013	true	true	wrong	wrong	wrong	wrong	wrong	wrong		0.966386	1.06718	1.28509	0.98857	1.16384	1.11101	6	0.126755	0.152996	0.0490952	true	true	wrong	wrong	wrong	wrong	wrong	wrong		1.32686	1.47695	0.639655	1.06046	1.46618	0.644651	6	0.0548902	0.564561
Q86V81	ALYREF	THO complex subunit 4 OS=Homo sapiens GN=ALYREF PE=1 SV=3 - [THOC4_HUMAN]		0.910608	0.962371	1.13884	0.972266	1.40933	5	0.090312	0.256121	0.237262	true	true	wrong	wrong	wrong	wrong	wrong	wrong			1.22345	1.04175	1.97549	1.37147	1.16015	5	0.400443	0.355215	0.0326515	true	true	wrong	wrong	wrong	wrong	wrong	wrong			1.08756	1.07371	0.845134	1.06681	1.15012	5	0.0552087	0.171975
P40939	HADHA	Trifunctional enzyme subunit alpha, mitochondrial OS=Homo sapiens GN=HADHA PE=1 SV=2 - [ECHA_HUMAN]	1.01818	1.13289	0.853348	0.810136	1.00289	0.782224	6	-0.112792	0.213046	0.125655	true	true	wrong	wrong	wrong	wrong	wrong	wrong		0.907867	0.767309	0.890974	0.805827	0.842927	0.805547	6	-0.259675	0.0934975	0.000522538	true	true	wrong	true	wrong	wrong	wrong	wrong		1.23758	1.57135	0.757759	0.978738	1.09149	0.802795	6	0.0562881	0.3945
P12270	TPR	Nucleoprotein TPR OS=Homo sapiens GN=TPR PE=1 SV=3 - [TPR_HUMAN]	1.05068	1.29004	1.16785	1.17677	1.87216	2.02169	6	0.469614	0.392927	0.0163628	true	true	wrong	wrong	wrong	wrong	wrong	wrong		0.990858	1.12729	1.20776	1.24335	1.43516	1.13368	6	0.241399	0.177621	0.0104006	true	true	wrong	wrong	wrong	wrong	wrong	wrong		1.08431	1.16845	0.744249	0.937327	0.965655	1.48366	6	0.0567657	0.335126
Q9BV38	WDR18	WD repeat-containing protein 18 OS=Homo sapiens GN=WDR18 PE=1 SV=2 - [WDR18_HUMAN]		0.785597					1	-0.348139	n.a.	n.a.	true	wrong	wrong	wrong	wrong	wrong	wrong	wrong			0.740093					1	-0.434221	n.a.	n.a.	true	wrong	wrong	wrong	wrong	wrong	wrong	wrong			1.04129					1	0.0583719	n.a.
A0MZ66	KIAA1598	Shootin-1 OS=Homo sapiens GN=KIAA1598 PE=1 SV=4 - [SHOT1_HUMAN]				1.36654			1	0.450523	n.a.	n.a.	true	wrong	wrong	wrong	wrong	wrong	wrong	wrong					1.3817			1	0.466445	n.a.	n.a.	true	wrong	wrong	wrong	wrong	wrong	wrong	wrong					0.886103	1.22493		2	0.0591248	0.330329
P46781	RPS9	40S ribosomal protein S9 OS=Homo sapiens GN=RPS9 PE=1 SV=3 - [RS9_HUMAN]	0.485812	0.881535	1.15814	0.475339	0.837236	1.08886	6	-0.369679	0.561213	0.083776	true	true	wrong	wrong	wrong	wrong	wrong	wrong		0.88105	1.15528	0.420482	0.863166	1.17893	0.352908	6	-0.450299	0.745884	0.0996282	true	true	wrong	wrong	wrong	wrong	wrong	wrong		0.624751	0.826161	2.32563	0.539409	0.787086	2.53059	6	0.061164	0.969864
Q9Y2W1	THRAP3	Thyroid hormone receptor-associated protein 3 OS=Homo sapiens GN=THRAP3 PE=1 SV=2 - [TR150_HUMAN]	1.67906		1.00878				2	0.38013	0.519757	0.244633	true	wrong	wrong	wrong	wrong	wrong	wrong	wrong		0.680605		0.620111				2	-0.622256	0.0949572	0.034215	true	wrong	wrong	wrong	wrong	wrong	wrong	wrong		1.23083		0.684168			1.35158	3	0.0622325	0.532408
P62081	RPS7	40S ribosomal protein S7 OS=Homo sapiens GN=RPS7 PE=1 SV=1 - [RS7_HUMAN]	0.414428	0.941567	1.08177	0.469052	0.893697	1.09738	6	-0.394089	0.622998	0.0909779	true	true	wrong	wrong	wrong	wrong	wrong	wrong		0.815793	1.04705	0.330107	0.94246	1.19505	0.313231	6	-0.554918	0.857656	0.0869263	true	true	wrong	wrong	wrong	wrong	wrong	wrong		0.581493	0.819058	2.50748	0.524323	0.80032	2.59994	6	0.0636273	1.0296
P04899	GNAI2	Guanine nucleotide-binding protein G(i) subunit alpha-2 OS=Homo sapiens GN=GNAI2 PE=1 SV=3 - [GNAI2_HUMAN]	1.99088	1.27625	0.705792				3	0.28088	0.750572	0.291676	true	true	wrong	wrong	wrong	wrong	wrong	wrong		0.630958	1.63849	1.08672				3	0.0559855	0.690602	0.450599	true	true	wrong	wrong	wrong	wrong	wrong	wrong		3.09236	0.762015	0.487678				3	0.0668672	1.39038
Q7Z569	BRAP	BRCA1-associated protein OS=Homo sapiens GN=BRAP PE=1 SV=2 - [BRAP_HUMAN]					0.113857		1	-3.13471	n.a.	n.a.	true	wrong	wrong	wrong	wrong	wrong	wrong	wrong						0.104334		1	-3.26072	n.a.	n.a.	true	wrong	wrong	wrong	wrong	wrong	wrong	wrong						1.04799		1	0.0676199	n.a.
P62861	FAU	40S ribosomal protein S30 OS=Homo sapiens GN=FAU PE=1 SV=1 - [RS30_HUMAN]	0.567737	0.943245	1.21195	0.512743	0.937733	1.17337	6	-0.241577	0.527518	0.156466	true	true	wrong	wrong	wrong	wrong	wrong	wrong		0.813421	1.15808	0.371251	0.834923	1.20711	0.314904	6	-0.528577	0.827192	0.0891517	true	true	wrong	wrong	wrong	wrong	wrong	wrong		0.658406	0.809802	2.42214	0.551866	0.737748	2.5404	6	0.0696037	0.979106
P33316	DUT	Deoxyuridine 5'-triphosphate nucleotidohydrolase, mitochondrial OS=Homo sapiens GN=DUT PE=1 SV=4 - [DUT_HUMAN]				0.686622		0.59783	2	-0.642302	0.141267	0.0491103	true	wrong	wrong	wrong	wrong	wrong	wrong	wrong					1.46204		2.00174	2	0.774618	0.320517	0.0906031	true	wrong	wrong	wrong	wrong	wrong	wrong	wrong		1.34504			1.34756		0.639517	3	0.0710161	0.620041
P49207	RPL34	60S ribosomal protein L34 OS=Homo sapiens GN=RPL34 PE=1 SV=3 - [RL34_HUMAN]		0.90626				1.12124	2	0.0115462	0.217151	0.47611	true	wrong	wrong	wrong	wrong	wrong	wrong	wrong			1.16516				0.661545	2	-0.18778	0.577435	0.362791	true	wrong	wrong	wrong	wrong	wrong	wrong	wrong			0.854013				1.29548	2	0.072909	0.425084
P12004	PCNA	Proliferating cell nuclear antigen OS=Homo sapiens GN=PCNA PE=1 SV=1 - [PCNA_HUMAN]	0.912708	1.01792	0.758079	1.36074	0.790023	0.492248	6	-0.237319	0.489585	0.144208	true	true	wrong	wrong	wrong	wrong	wrong	wrong		0.857961	0.772194	0.955674	0.873093	0.736164	1.22542	6	-0.167301	0.262266	0.0894605	true	true	wrong	wrong	wrong	wrong	wrong	wrong		1.3664	1.5691	0.680678	2.12351	1.27411	0.343151	6	0.0730367	0.957587
O15160	POLR1C	DNA-directed RNA polymerases I and III subunit RPAC1 OS=Homo sapiens GN=POLR1C PE=1 SV=1 - [RPAC1_HUMAN]	0.577595	0.564953	0.594993	0.464421		0.508786	5	-0.889217	0.14828	8.94426e-05	true	true	wrong	true	wrong	wrong	wrong	wrong		0.747021	0.614131	0.624955	0.428871		0.505673	5	-0.801489	0.307933	0.00216988	true	true	wrong	true	wrong	wrong	wrong	wrong		0.909031	1.01158	0.844306	1.98589		0.837873	5	0.0738874	0.523529
P09874	PARP1	Poly [ADP-ribose] polymerase 1 OS=Homo sapiens GN=PARP1 PE=1 SV=4 - [PARP1_HUMAN]	0.93315	0.941446	0.763824	0.72513	0.857745	0.666125	6	-0.307794	0.203848	0.00701038	true	true	wrong	wrong	wrong	wrong	wrong	wrong		0.728806	0.843763	0.671857	0.9577	0.81434	0.576311	6	-0.404832	0.260032	0.00622774	true	true	wrong	wrong	wrong	wrong	wrong	wrong		1.48438	1.24003	0.963882	0.769604	1.11733	0.904837	6	0.0775233	0.339707
Q9NWV8	BABAM1	BRISC and BRCA1-A complex member 1 OS=Homo sapiens GN=BABAM1 PE=1 SV=1 - [BABA1_HUMAN]		0.372266					1	-1.42559	n.a.	n.a.	true	wrong	wrong	wrong	wrong	wrong	wrong	wrong			0.345022					1	-1.53524	n.a.	n.a.	true	wrong	wrong	wrong	wrong	wrong	wrong	wrong			1.05719					1	0.0802403	n.a.
Q32MZ4	LRRFIP1	Leucine-rich repeat flightless-interacting protein 1 OS=Homo sapiens GN=LRRFIP1 PE=1 SV=2 - [LRRF1_HUMAN]	0.834988		0.931487				2	-0.181282	0.111567	0.130654	true	wrong	wrong	wrong	wrong	wrong	wrong	wrong		0.830629		0.626392				2	-0.471293	0.28789	0.129785	true	wrong	wrong	wrong	wrong	wrong	wrong	wrong		1.14631		0.975468				2	0.0805791	0.164633
Q16763	UBE2S	Ubiquitin-conjugating enzyme E2 S OS=Homo sapiens GN=UBE2S PE=1 SV=2 - [UBE2S_HUMAN]		1.38452	1.06825		1.40963	0.907764	4	0.230088	0.30685	0.115331	true	true	wrong	wrong	wrong	wrong	wrong	wrong			1.19364	1.724		1.69776	2.02726	4	0.706074	0.322001	0.0109778	true	true	wrong	wrong	wrong	wrong	wrong	wrong			1.57214	0.735885		1.66479	0.650534	4	0.0813305	0.712007
P53350	PLK1	Serine/threonine-protein kinase PLK1 OS=Homo sapiens GN=PLK1 PE=1 SV=1 - [PLK1_HUMAN]	0.333631	0.494151		0.319328	0.552956	0.637418	5	-1.1504	0.444451	0.00221432	true	true	wrong	true	wrong	wrong	wrong	wrong		0.336362	0.393971		0.352679	0.464691	0.369897	5	-1.39196	0.180943	3.3506e-05	true	true	wrong	true	wrong	wrong	wrong	wrong		0.987977	1.2477		0.841109	1.15505	1.11548	5	0.0835622	0.222345
Q92769	HDAC2	Histone deacetylase 2 OS=Homo sapiens GN=HDAC2 PE=1 SV=2 - [HDAC2_HUMAN]		0.357912		0.469813	0.170324	0.80378	4	-1.36023	0.931754	0.0307549	true	true	wrong	wrong	wrong	wrong	wrong	wrong			0.537677		0.858471		0.412429	3	-0.79771	0.535508	0.0615444	true	true	wrong	wrong	wrong	wrong	wrong	wrong			0.923363		0.684985		1.88304	3	0.0840603	0.74956
P31153	MAT2A	S-adenosylmethionine synthase isoform type-2 OS=Homo sapiens GN=MAT2A PE=1 SV=1 - [METK2_HUMAN]	0.766118	1.25481		0.620252	1.70301	0.899382	5	-0.0261728	0.578736	0.462159	true	true	wrong	wrong	wrong	wrong	wrong	wrong		0.921982	0.786433		0.794498	1.07686	0.715719	5	-0.234278	0.231213	0.0430676	true	true	wrong	wrong	wrong	wrong	wrong	wrong		0.836223	1.60551		0.73218	1.55252	0.88084	5	0.085365	0.532724
P06576	ATP5B	ATP synthase subunit beta, mitochondrial OS=Homo sapiens GN=ATP5B PE=1 SV=3 - [ATPB_HUMAN]	1.02278	1.15872		0.870565	1.14769	0.514412	5	-0.143044	0.485565	0.273028	true	true	wrong	wrong	wrong	wrong	wrong	wrong		0.751556	0.764893		0.659474	0.732406	0.8622	5	-0.412504	0.138606	0.00132401	true	true	wrong	true	wrong	wrong	wrong	wrong		1.25867	1.38518		1.22045	1.28592	0.496869	5	0.0886243	0.617311
P51570	GALK1	Galactokinase OS=Homo sapiens GN=GALK1 PE=1 SV=1 - [GALK1_HUMAN]	0.416205	0.464375				0.233106	3	-1.49074	0.534324	0.0201279	true	true	wrong	wrong	wrong	wrong	wrong	wrong		0.283723	0.332917				0.403421	3	-1.57128	0.254256	0.00430766	true	true	wrong	true	wrong	wrong	wrong	wrong		1.43941	1.36811				0.613771	3	0.0911443	0.689786
Q7KZF4	SND1	Staphylococcal nuclease domain-containing protein 1 OS=Homo sapiens GN=SND1 PE=1 SV=1 - [SND1_HUMAN]	1.00226	0.974337	0.764908		0.960293	0.510949	5	-0.289619	0.410306	0.0948129	true	true	wrong	wrong	wrong	wrong	wrong	wrong		0.828798	0.656749	0.970714		0.685356	0.751364	5	-0.375574	0.226436	0.0103378	true	true	wrong	wrong	wrong	wrong	wrong	wrong		1.45294	1.51726	0.727779		1.53469	0.558719	5	0.0920293	0.690505
Q05682	CALD1	Caldesmon OS=Homo sapiens GN=CALD1 PE=1 SV=3 - [CALD1_HUMAN]		0.439991		0.668252	0.375779	0.495011	4	-1.04813	0.351122	0.00470189	true	true	wrong	true	wrong	wrong	wrong	wrong			0.574352		0.80347		0.638476	3	-0.587658	0.247601	0.0271959	true	true	wrong	wrong	wrong	wrong	wrong	wrong			1.19442		1.2085		0.83917	3	0.0921861	0.29903
P43243	MATR3	Matrin-3 OS=Homo sapiens GN=MATR3 PE=1 SV=2 - [MATR3_HUMAN]	0.422462	0.249711	0.268787		0.167035	0.161659	5	-2.0702	0.568607	0.000619315	true	true	wrong	true	wrong	wrong	wrong	wrong		0.509241	0.378357	0.459696		0.292208	0.49775	5	-1.25569	0.335717	0.000558789	true	true	wrong	true	wrong	wrong	wrong	wrong		1.75889	1.3762	1.0191		1.27925	0.438211	5	0.0935274	0.770711
P08754	GNAI3	Guanine nucleotide-binding protein G(k) subunit alpha OS=Homo sapiens GN=GNAI3 PE=1 SV=3 - [GNAI3_HUMAN]	3.08161	2.35959	0.991004				3	0.949727	0.855729	0.0972496	true	true	wrong	wrong	wrong	wrong	wrong	wrong		1.19243	2.08448	1.57127				3	0.655177	0.402901	0.0531632	true	true	wrong	wrong	wrong	wrong	wrong	wrong		2.3131	1.11108	0.474801				3	0.095727	1.14325
P35611	ADD1	Alpha-adducin OS=Homo sapiens GN=ADD1 PE=1 SV=2 - [ADDA_HUMAN]		0.195966			0.137571	0.264049	3	-2.37807	0.470883	0.00640934	true	true	wrong	wrong	wrong	wrong	wrong	wrong			0.154023			0.150304	0.104242	3	-2.89828	0.315482	0.00196315	true	true	wrong	true	wrong	wrong	wrong	wrong			0.959695			0.810493	1.57227	3	0.0967898	0.496747
P07437	TUBB	Tubulin beta chain OS=Homo sapiens GN=TUBB PE=1 SV=2 - [TBB5_HUMAN]	0.387106	0.364808	0.437749	0.364703	0.390415	0.535054	6	-1.28836	0.212216	1.24389e-05	true	true	wrong	true	wrong	wrong	wrong	wrong		0.457674	0.463061	0.332868	0.488084	0.421781	0.33636	6	-1.27958	0.24193	2.44163e-05	true	true	wrong	true	wrong	wrong	wrong	wrong		1.04361	1.00764	1.2063	0.827743	1.07735	1.32508	6	0.0973289	0.232867
O60869	EDF1	Endothelial differentiation-related factor 1 OS=Homo sapiens GN=EDF1 PE=1 SV=1 - [EDF1_HUMAN]	1.45231	2.34786	1.33	1.20402	2.41552	1.18019	6	0.660056	0.470951	0.0092871	true	true	wrong	wrong	wrong	wrong	wrong	wrong		1.22966	2.02531	1.66726	1.29653	1.82529	1.36592	6	0.624422	0.292033	0.00168042	true	true	wrong	true	wrong	wrong	wrong	wrong		1.24938	1.37484	0.726965	1.11798	1.53186	0.711169	6	0.100813	0.471387
Q9Y237	PIN4	Peptidyl-prolyl cis-trans isomerase NIMA-interacting 4 OS=Homo sapiens GN=PIN4 PE=1 SV=1 - [PIN4_HUMAN]	1.97809	2.87253	1.5283	1.93673	2.78941	1.2833	6	0.985299	0.461447	0.00169052	true	true	wrong	true	wrong	wrong	wrong	wrong		1.15901	1.59223	1.41446	1.50244	1.58407	1.54833	6	0.544309	0.174007	0.000301539	true	true	wrong	true	wrong	wrong	wrong	wrong		1.67342	1.6643	0.757907	1.1797	1.72862	0.35455	6	0.101651	0.906416
P31943	HNRNPH1	Heterogeneous nuclear ribonucleoprotein H OS=Homo sapiens GN=HNRNPH1 PE=1 SV=4 - [HNRH1_HUMAN]	0.744167	0.699273	0.387048	0.810174	0.752078	0.786842	6	-0.562065	0.402162	0.0093843	true	true	wrong	wrong	wrong	wrong	wrong	wrong		0.652261	0.578395	0.653888	0.650386	0.672545	0.480555	6	-0.711566	0.185504	0.000115152	true	true	wrong	true	wrong	wrong	wrong	wrong		1.37923	1.40012	0.525318	1.16039	1.04818	1.24572	6	0.103361	0.52925
P21796	VDAC1	Voltage-dependent anion-selective channel protein 1 OS=Homo sapiens GN=VDAC1 PE=1 SV=2 - [VDAC1_HUMAN]				2.38313	1.56678	1.10536	3	0.681724	0.554951	0.0835898	true	true	wrong	wrong	wrong	wrong	wrong	wrong					1.91239	1.62697	1.41466	3	0.712673	0.217651	0.0148556	true	true	wrong	wrong	wrong	wrong	wrong	wrong					1.48528	1.2015	0.694877	3	0.103465	0.565492
Q0VDF9	HSPA14	Heat shock 70 kDa protein 14 OS=Homo sapiens GN=HSPA14 PE=1 SV=1 - [HSP7E_HUMAN]	0.55682			0.700378			2	-0.679255	0.233998	0.0760567	true	wrong	wrong	wrong	wrong	wrong	wrong	wrong		0.567707			0.556505		0.659251	3	-0.754471	0.133599	0.00514546	true	true	wrong	wrong	wrong	wrong	wrong	wrong		0.983237			1.17835			2	0.106192	0.18467
P63165	SUMO1	Small ubiquitin-related modifier 1 OS=Homo sapiens GN=SUMO1 PE=1 SV=1 - [SUMO1_HUMAN]					0.0578605		1	-4.11128	n.a.	n.a.	true	wrong	wrong	wrong	wrong	wrong	true	wrong						0.229648		1	-2.12251	n.a.	n.a.	true	wrong	wrong	wrong	wrong	wrong	true	wrong					1.84774	0.62797		2	0.107263	1.10096
P48047	ATP5O	ATP synthase subunit O, mitochondrial OS=Homo sapiens GN=ATP5O PE=1 SV=1 - [ATPO_HUMAN]	0.977381	1.39251	0.955008	1.22773	1.43895	0.837621	6	0.157275	0.320587	0.141647	true	true	wrong	wrong	wrong	wrong	wrong	wrong		0.946952	1.10636	1.27983	1.28886	1.07294	1.07652	6	0.166197	0.169751	0.0308787	true	true	wrong	wrong	wrong	wrong	wrong	wrong		1.27508	1.65293	0.687864	1.06546	1.6647	0.612922	6	0.109389	0.619015
P54652	HSPA2	Heat shock-related 70 kDa protein 2 OS=Homo sapiens GN=HSPA2 PE=1 SV=1 - [HSP72_HUMAN]	0.349633		0.345914		0.0871057		3	-2.18956	1.15316	0.0406684	true	true	wrong	wrong	wrong	wrong	wrong	wrong		0.49512	0.240447	0.345793				3	-1.53413	0.521033	0.0181824	true	true	wrong	wrong	wrong	wrong	wrong	wrong		1.03391		1.126				2	0.109661	0.0870407
Q9UHD8	2009-09-01	Septin-9 OS=Homo sapiens GN=SEPT9 PE=1 SV=2 - [SEPT9_HUMAN]				0.250223	0.424671	0.369549	3	-1.55682	0.395615	0.0104271	true	true	wrong	wrong	wrong	wrong	wrong	wrong					0.242168	0.32102	0.26386	3	-1.86911	0.208451	0.00206014	true	true	wrong	true	wrong	wrong	wrong	wrong					1.05144	1.41009	0.848726	3	0.110511	0.367696
Q99623	PHB2	Prohibitin-2 OS=Homo sapiens GN=PHB2 PE=1 SV=2 - [PHB2_HUMAN]	0.854502	0.796165	0.753841	0.638782	0.775446	0.742438	6	-0.401089	0.139918	0.000451881	true	true	wrong	true	wrong	wrong	wrong	wrong		0.907572	0.604816	1.03854	0.646261	0.63627	0.619356	6	-0.464008	0.333715	0.00956461	true	true	wrong	wrong	wrong	wrong	wrong	wrong		1.179	1.78263	0.696083	0.99188	1.33882	0.818852	6	0.111628	0.492116
P30041	PRDX6	Peroxiredoxin-6 OS=Homo sapiens GN=PRDX6 PE=1 SV=3 - [PRDX6_HUMAN]	0.946318	1.4099	0.9223	1.59521	1.32975	0.723752	6	0.152961	0.439483	0.216422	true	true	wrong	wrong	wrong	wrong	wrong	wrong		0.81305	1.10794	1.74688	2.59564	1.11027	1.27075	6	0.421126	0.588303	0.0699521	true	true	wrong	wrong	wrong	wrong	wrong	wrong		1.89046	1.7974	0.596314	0.841146	1.84898	0.507998	6	0.113141	0.876636
P49959	MRE11A	Double-strand break repair protein MRE11A OS=Homo sapiens GN=MRE11A PE=1 SV=3 - [MRE11_HUMAN]	1.02826	0.54042		0.813349	0.331603		4	-0.684541	0.716542	0.0760122	true	true	wrong	wrong	wrong	wrong	wrong	wrong		0.648966	0.581693		0.418766	0.428536		4	-0.970937	0.31663	0.00435868	true	true	wrong	true	wrong	wrong	wrong	wrong		1.39597	0.92078		1.5987	0.665973		4	0.113159	0.576402
Q12905	ILF2	Interleukin enhancer-binding factor 2 OS=Homo sapiens GN=ILF2 PE=1 SV=2 - [ILF2_HUMAN]		0.667959	0.508383	0.690542	0.644681	0.518487	5	-0.734669	0.210539	0.000727827	true	true	wrong	true	wrong	wrong	wrong	wrong			0.478739	0.487177	0.462578	0.500583	0.373772	5	-1.1261	0.16929	5.94877e-05	true	true	wrong	true	wrong	wrong	wrong	wrong			1.37498	0.810291	1.32774	1.13568	0.920636	5	0.12583	0.331353
Q9UHB9	SRP68	Signal recognition particle 68 kDa protein OS=Homo sapiens GN=SRP68 PE=1 SV=2 - [SRP68_HUMAN]	0.649096	0.784107	0.776573	0.486559	0.70116	0.311081	6	-0.762553	0.517019	0.00766789	true	true	wrong	wrong	wrong	wrong	wrong	wrong		0.536631	0.485327	0.421396	0.45688	0.465114	0.462063	6	-1.08934	0.114916	1.37849e-06	true	true	wrong	true	wrong	wrong	wrong	wrong		1.10537	1.44927	1.27736	0.54635	1.38154	1.10017	6	0.127488	0.516066
P27635	RPL10	60S ribosomal protein L10 OS=Homo sapiens GN=RPL10 PE=1 SV=4 - [RL10_HUMAN]	0.649914	0.805843	1.08247		0.677272	1.04621	5	-0.263161	0.342995	0.0806888	true	true	wrong	wrong	wrong	wrong	wrong	wrong		1.19565	1.1773	0.556586		1.12321	0.508143	5	-0.232223	0.622268	0.225476	true	true	wrong	wrong	wrong	wrong	wrong	wrong		0.712357	0.863039	1.87743	0.987488	0.794271	1.88633	6	0.128674	0.626121
O43707	ACTN4	Alpha-actinin-4 OS=Homo sapiens GN=ACTN4 PE=1 SV=2 - [ACTN4_HUMAN]	3.23176	3.76956	1.47979		3.07244	0.835218	5	1.10634	0.924451	0.0277285	true	true	true	wrong	wrong	wrong	true	wrong		1.30253	2.42373	3.10974		1.21557	3.35531	5	1.06468	0.692358	0.0131643	true	true	true	wrong	wrong	wrong	true	wrong		2.0326	1.81304	0.488365		2.87321	0.303382	5	0.129927	1.41848
Q8TEQ6	GEMIN5	Gem-associated protein 5 OS=Homo sapiens GN=GEMIN5 PE=1 SV=3 - [GEMI5_HUMAN]		0.164226	0.356856	0.341132	0.150951	0.147426	5	-2.22684	0.649078	0.000776154	true	true	wrong	true	wrong	wrong	wrong	wrong			0.226748	0.194713	0.255413	0.18387	0.155032	5	-2.32062	0.277711	2.41482e-05	true	true	wrong	true	wrong	wrong	wrong	wrong			0.851863	1.71156	1.46676	0.944879	0.779834	5	0.131216	0.502327
Q15233	NONO	Non-POU domain-containing octamer-binding protein OS=Homo sapiens GN=NONO PE=1 SV=4 - [NONO_HUMAN]	0.822207	0.855992	0.837139	0.717557	0.725387	0.536753	6	-0.433817	0.251519	0.00414454	true	true	wrong	true	wrong	wrong	wrong	wrong		0.558816	0.597352	0.65995	0.470282	0.504696	0.579499	6	-0.840752	0.174992	3.89603e-05	true	true	wrong	true	wrong	wrong	wrong	wrong		1.50289	1.41445	0.92578	1.54736	1.19567	0.477828	6	0.133152	0.648069
P48444	ARCN1	Coatomer subunit delta OS=Homo sapiens GN=ARCN1 PE=1 SV=1 - [COPD_HUMAN]	0.5428	0.498937		0.506904	0.477468	0.186652	5	-1.27058	0.646855	0.00588131	true	true	wrong	wrong	wrong	wrong	wrong	wrong		0.740577	0.520455		0.813626	0.629689	0.392735	5	-0.737731	0.420141	0.00857789	true	true	wrong	wrong	wrong	wrong	wrong	wrong		1.17601	1.21538		0.844108	1.25046	1.05543	5	0.134217	0.231106
P61247	RPS3A	40S ribosomal protein S3a OS=Homo sapiens GN=RPS3A PE=1 SV=2 - [RS3A_HUMAN]	0.63511	0.824551	0.986698	0.399703	0.853156	0.997266	6	-0.418105	0.502141	0.0484618	true	true	wrong	wrong	wrong	wrong	wrong	wrong		0.721932	0.773339	0.469903	0.726998	0.82649	0.454567	6	-0.6338	0.378506	0.00467004	true	true	wrong	true	wrong	wrong	wrong	wrong		0.914229	1.04615	1.75611	0.665883	0.876609	1.79777	6	0.136277	0.57721
P19338	NCL	Nucleolin OS=Homo sapiens GN=NCL PE=1 SV=3 - [NUCL_HUMAN]	0.845613	0.904823	1.04835	0.703995	0.804267	0.87511	6	-0.221865	0.190183	0.0177544	true	true	wrong	wrong	wrong	wrong	wrong	wrong		0.788932	0.772496	0.734602	0.841557	0.790244	0.63622	6	-0.400049	0.138807	0.000440833	true	true	wrong	true	wrong	wrong	wrong	wrong		1.15762	1.30784	1.21867	0.765593	1.15622	1.08989	6	0.13865	0.271415
Q9UHD1	CHORDC1	Cysteine and histidine-rich domain-containing protein 1 OS=Homo sapiens GN=CHORDC1 PE=1 SV=2 - [CHRD1_HUMAN]	1.10711	1.44882	0.955465			0.936462	4	0.130313	0.290409	0.217809	true	true	wrong	wrong	wrong	wrong	wrong	wrong		0.893506	0.77932	1.20169				3	-0.0857015	0.319379	0.343891	true	true	wrong	wrong	wrong	wrong	wrong	wrong		1.17419	1.90941	0.578451			1.13487	4	0.139397	0.707969
P20042	EIF2S2	Eukaryotic translation initiation factor 2 subunit 2 OS=Homo sapiens GN=EIF2S2 PE=1 SV=2 - [IF2B_HUMAN]	0.801019	0.893529		0.80685	0.991173	0.901152	5	-0.191017	0.127457	0.0142692	true	true	wrong	wrong	wrong	wrong	wrong	wrong		0.664372	0.754434		0.790012	0.812717	0.593057	5	-0.477891	0.190189	0.00246626	true	true	wrong	true	wrong	wrong	wrong	wrong		1.20531	1.17662		0.915962	1.19789	1.05095	5	0.141922	0.170269
P32119	PRDX2	Peroxiredoxin-2 OS=Homo sapiens GN=PRDX2 PE=1 SV=5 - [PRDX2_HUMAN]	1.11682	1.65336	0.620957		1.50058	0.890195	5	0.123014	0.57435	0.3285	true	true	wrong	wrong	wrong	wrong	wrong	wrong		0.905317	0.907025	1.17327		0.689518	1.03771	5	-0.10734	0.285684	0.224053	true	true	wrong	wrong	wrong	wrong	wrong	wrong		1.34848	1.94228	0.434337		2.26482	0.636334	5	0.142646	1.03264
P05387	RPLP2	60S acidic ribosomal protein P2 OS=Homo sapiens GN=RPLP2 PE=1 SV=1 - [RLA2_HUMAN]	0.66213	0.654865	0.801934	0.720574	0.844424	0.811391	6	-0.42371	0.158101	0.00061501	true	true	wrong	true	wrong	wrong	wrong	wrong		0.540104	0.592211	0.538474	0.579387	0.670311	0.463668	6	-0.835148	0.176798	4.22983e-05	true	true	wrong	true	wrong	wrong	wrong	wrong		1.19776	1.09097	1.0897	1.00884	1.04613	1.20803	6	0.143385	0.104209
Q96HS1	PGAM5	Serine/threonine-protein phosphatase PGAM5, mitochondrial OS=Homo sapiens GN=PGAM5 PE=1 SV=2 - [PGAM5_HUMAN]	0.535063	0.416683	0.678826	0.451528	0.384915	0.593891	6	-1.00005	0.315912	0.000285218	true	true	wrong	true	wrong	wrong	wrong	wrong		0.678974	0.576946	0.314999	0.641579	0.594148	0.251547	6	-1.06686	0.604753	0.00378098	true	true	wrong	true	wrong	wrong	wrong	wrong		0.933919	0.832467	1.91396	0.741625	0.762692	2.17836	6	0.145763	0.697104
Q15393	SF3B3	Splicing factor 3B subunit 3 OS=Homo sapiens GN=SF3B3 PE=1 SV=4 - [SF3B3_HUMAN]	0.570698	0.441079	0.600754	0.524421	0.406047	0.49984	6	-0.992866	0.216271	4.85652e-05	true	true	wrong	true	wrong	wrong	wrong	wrong		0.715583	0.609168	0.598996	0.713169	0.529149	0.468544	6	-0.739494	0.239724	0.000321776	true	true	wrong	true	wrong	wrong	wrong	wrong		1.2163	1.09251	1.00619	1.19645	0.983707	1.17128	6	0.147031	0.131153
Q9BZE1	MRPL37	39S ribosomal protein L37, mitochondrial OS=Homo sapiens GN=MRPL37 PE=1 SV=2 - [RM37_HUMAN]	0.728236	0.742071	0.701077				3	-0.466749	0.0417646	0.00132912	true	true	wrong	true	wrong	wrong	wrong	wrong		0.67972	0.656246	0.647923				3	-0.596929	0.0357942	0.000598202	true	true	wrong	true	wrong	wrong	wrong	wrong		1.18377	1.24972	0.918821				3	0.147617	0.23687
P42677	RPS27	40S ribosomal protein S27 OS=Homo sapiens GN=RPS27 PE=1 SV=3 - [RS27_HUMAN]	0.547454	0.582516	0.619886	0.608703	0.574698	0.542727	6	-0.789293	0.0778863	9.8966e-07	true	true	wrong	true	wrong	wrong	wrong	wrong		0.556607	0.60397	0.319175	0.563301	0.694587	0.230596	6	-1.11511	0.622777	0.00355752	true	true	wrong	true	wrong	wrong	wrong	wrong		0.980286	0.962933	1.48419	0.981326	0.824056	1.63328	6	0.147975	0.3941
P18621	RPL17	60S ribosomal protein L17 OS=Homo sapiens GN=RPL17 PE=1 SV=3 - [RL17_HUMAN]	0.388546		0.828477	0.411869	0.620487	0.882737	5	-0.756704	0.551121	0.0186432	true	true	wrong	wrong	wrong	wrong	wrong	wrong		0.623583		0.334398	0.783317	1.03252	0.339093	5	-0.825624	0.727004	0.032011	true	true	wrong	wrong	wrong	wrong	wrong	wrong		0.739716		2.28177	0.582536	0.800155	2.12372	5	0.148112	0.920306
P62195	PSMC5	26S protease regulatory subunit 8 OS=Homo sapiens GN=PSMC5 PE=1 SV=1 - [PRS8_HUMAN]	0.474334		0.501804			0.315584	3	-1.24491	0.365124	0.0137483	true	true	wrong	wrong	true	wrong	wrong	wrong		0.588539		0.431745			0.128721	3	-1.64474	1.15879	0.0665953	true	true	wrong	wrong	wrong	wrong	wrong	wrong		0.819701		0.959316			1.7321	3	0.14859	0.569086
Q5SRD0	FAM21D	Putative WASH complex subunit FAM21 OS=Homo sapiens GN=FAM21D PE=3 SV=2 - [FA21D_HUMAN]			0.382624				1	-1.386	n.a.	n.a.	true	wrong	wrong	wrong	wrong	wrong	wrong	wrong				0.259537				1	-1.94599	n.a.	n.a.	true	wrong	wrong	wrong	wrong	wrong	wrong	wrong				1.10904				1	0.14931	n.a.
Q07020	RPL18	60S ribosomal protein L18 OS=Homo sapiens GN=RPL18 PE=1 SV=2 - [RL18_HUMAN]	0.768398	0.799008	1.03934	0.715602	0.726056	0.863366	6	-0.300784	0.200409	0.00717423	true	true	wrong	wrong	wrong	wrong	wrong	wrong		0.62291	0.675003	0.530625	0.566128	0.725072	0.434847	6	-0.775033	0.26529	0.000414065	true	true	wrong	true	wrong	wrong	wrong	wrong		1.22869	0.951544	1.29123	0.952528	0.957996	1.36217	6	0.15134	0.244767
P14923	JUP	Junction plakoglobin OS=Homo sapiens GN=JUP PE=1 SV=3 - [PLAK_HUMAN]		0.100585	0.198047	0.191303	0.0670872		4	-2.98337	0.757397	0.00213091	true	true	wrong	true	wrong	wrong	wrong	wrong			0.122201	0.081307	0.0782278	0.103238	0.0787249	5	-3.45446	0.287958	5.74072e-06	true	true	wrong	true	wrong	wrong	wrong	wrong			0.660836	1.62553	2.7417	0.520114		4	0.153811	1.1196
O43709	WBSCR22	Uncharacterized methyltransferase WBSCR22 OS=Homo sapiens GN=WBSCR22 PE=1 SV=2 - [WBS22_HUMAN]	0.647749	0.94991	1.02809	0.753286		0.910224	5	-0.24102	0.27139	0.0590057	true	true	wrong	wrong	wrong	wrong	wrong	wrong		0.71576	1.00909	0.479382	0.560768		0.694318	5	-0.578201	0.406201	0.0167212	true	true	wrong	wrong	wrong	wrong	wrong	wrong		0.939141	0.976411	1.70599	1.29805	0.99079	0.945907	6	0.154725	0.348667
O60716	CTNND1	Catenin delta-1 OS=Homo sapiens GN=CTNND1 PE=1 SV=1 - [CTND1_HUMAN]	0.463057	0.469015	0.498958		0.575473	0.404081	5	-1.0621	0.185113	0.000106385	true	true	wrong	true	wrong	wrong	wrong	wrong		0.514587	0.507766	0.338107		0.394679	0.29429	5	-1.32133	0.355579	0.000572879	true	true	wrong	true	wrong	wrong	wrong	wrong		0.973968	1.00119	1.22629		1.26316	1.13317	5	0.155073	0.168781
Q15287	RNPS1	RNA-binding protein with serine-rich domain 1 OS=Homo sapiens GN=RNPS1 PE=1 SV=1 - [RNPS1_HUMAN]		0.393675	0.444789				2	-1.25687	0.124532	0.0222648	true	wrong	wrong	wrong	wrong	wrong	wrong	wrong			0.442593	0.401186				2	-1.2468	0.100202	0.0180696	true	wrong	wrong	wrong	wrong	wrong	wrong	wrong			1.13864	1.08958				2	0.155542	0.0449228
P05091	ALDH2	Aldehyde dehydrogenase, mitochondrial OS=Homo sapiens GN=ALDH2 PE=1 SV=2 - [ALDH2_HUMAN]	1.08507	0.87849			0.779375		3	-0.142909	0.241719	0.206757	true	true	wrong	wrong	wrong	wrong	wrong	wrong		0.975571	0.832232			0.740591		3	-0.244624	0.199562	0.0838641	true	true	wrong	wrong	wrong	wrong	wrong	wrong		1.16569	1.10619			1.07682		3	0.157857	0.0581755
P61353	RPL27	60S ribosomal protein L27 OS=Homo sapiens GN=RPL27 PE=1 SV=2 - [RL27_HUMAN]	0.772743	0.855328	1.1217	0.719533	0.974765	0.941409	6	-0.171757	0.23412	0.0661324	true	true	wrong	wrong	wrong	wrong	wrong	wrong		0.649802	0.793422	0.590673	0.70905	0.926102	0.520578	6	-0.543992	0.298317	0.00329959	true	true	wrong	true	wrong	wrong	wrong	wrong		1.12187	1.04783	1.41581	0.885331	0.985283	1.33099	6	0.158391	0.258714
Q8WUM4	PDCD6IP	Programmed cell death 6-interacting protein OS=Homo sapiens GN=PDCD6IP PE=1 SV=1 - [PDC6I_HUMAN]			0.903829	0.854789	1.2065	0.929115	4	-0.0518713	0.220873	0.335303	true	true	wrong	wrong	wrong	wrong	wrong	wrong				1.32809	0.799321	1.06232	1.47975	4	0.184691	0.392759	0.208176	true	true	wrong	wrong	wrong	wrong	wrong	wrong				0.836581	1.59703	1.66131	0.700073	4	0.158967	0.638295
O60427	FADS1	Fatty acid desaturase 1 OS=Homo sapiens GN=FADS1 PE=1 SV=1 - [FADS1_HUMAN]		0.475238					1	-1.07328	n.a.	n.a.	true	wrong	wrong	wrong	wrong	wrong	wrong	wrong			0.417141					1	-1.26139	n.a.	n.a.	true	wrong	wrong	wrong	wrong	wrong	wrong	wrong			1.11654					1	0.159035	n.a.
P05388	RPLP0	60S acidic ribosomal protein P0 OS=Homo sapiens GN=RPLP0 PE=1 SV=1 - [RLA0_HUMAN]	0.523992	0.565831	0.849207	0.552786	0.655598	0.724903	6	-0.653036	0.267953	0.000944194	true	true	wrong	true	wrong	wrong	wrong	wrong		0.48683	0.606792	0.462997	0.52126	0.590382	0.422795	6	-0.968723	0.20275	4.00232e-05	true	true	wrong	true	wrong	wrong	wrong	wrong		1.12661	1.0866	1.42589	1.06729	1.02031	1.02163	6	0.159583	0.180974
P62273	RPS29	40S ribosomal protein S29 OS=Homo sapiens GN=RPS29 PE=1 SV=2 - [RS29_HUMAN]	0.638025	1.25151				0.952289	3	-0.131723	0.488876	0.343313	true	true	wrong	wrong	wrong	wrong	wrong	wrong		1.00041	1.46483				0.429411	3	-0.222747	0.906036	0.355842	true	true	wrong	wrong	wrong	wrong	wrong	wrong		0.754958	1.01158				1.82782	3	0.160399	0.649869
O43290	SART1	U4/U6.U5 tri-snRNP-associated protein 1 OS=Homo sapiens GN=SART1 PE=1 SV=1 - [SNUT1_HUMAN]	0.528439	0.432989	0.648407		0.520579		4	-0.923657	0.238148	0.00222828	true	true	wrong	true	wrong	wrong	wrong	wrong		0.593231	0.502159	0.410801		0.589382		4	-0.948333	0.249579	0.00236409	true	true	wrong	true	wrong	wrong	wrong	wrong		1.03334	0.970119	1.40283		1.11315		4	0.161634	0.232407
P62244	RPS15A	40S ribosomal protein S15a OS=Homo sapiens GN=RPS15A PE=1 SV=2 - [RS15A_HUMAN]	0.769265	1.06752	1.16425	0.687925	1.04566	1.10851	6	-0.0652351	0.313753	0.31611	true	true	wrong	wrong	wrong	wrong	wrong	wrong		0.817816	1.00927	0.467729	0.769991	0.9585	0.426238	6	-0.506934	0.529857	0.0330453	true	true	wrong	wrong	wrong	wrong	wrong	wrong		0.871294	0.969324	1.79849	0.745588	0.973385	1.78997	6	0.163423	0.544929
Q9H6T3	RPAP3	RNA polymerase II-associated protein 3 OS=Homo sapiens GN=RPAP3 PE=1 SV=2 - [RPAP3_HUMAN]		0.279153	0.408125	0.300567	0.231341	0.234913	5	-1.81395	0.332951	0.000130299	true	true	wrong	true	wrong	wrong	wrong	wrong			0.333611	0.32009	0.36871	0.27509	0.221938	5	-1.74009	0.285211	8.35917e-05	true	true	wrong	true	wrong	wrong	wrong	wrong			1.08936	1.27304	0.988607	1.06605	1.20677	5	0.16373	0.145615
Q9H444	CHMP4B	Charged multivesicular body protein 4b OS=Homo sapiens GN=CHMP4B PE=1 SV=1 - [CHM4B_HUMAN]				0.600811			1	-0.735017	n.a.	n.a.	true	wrong	wrong	wrong	wrong	wrong	wrong	wrong					0.599725			1	-0.737627	n.a.	n.a.	true	wrong	wrong	wrong	wrong	wrong	wrong	wrong					1.12068			1	0.164379	n.a.
Q14683	SMC1A	Structural mainten.a.ce of chromosomes protein 1A OS=Homo sapiens GN=SMC1A PE=1 SV=2 - [SMC1A_HUMAN]	0.551754		0.648693		0.480529	0.766043	4	-0.731026	0.290978	0.00759329	true	true	wrong	wrong	wrong	wrong	wrong	wrong		0.947777		0.884306		0.657126	0.490011	4	-0.472409	0.436193	0.059448	true	true	wrong	wrong	wrong	wrong	wrong	wrong		0.873176		0.844695		1.07178	1.99585	4	0.164464	0.57544
P82914	MRPS15	28S ribosomal protein S15, mitochondrial OS=Homo sapiens GN=MRPS15 PE=1 SV=1 - [RT15_HUMAN]					0.379285	1.12332	2	-0.615439	1.10762	0.288	true	wrong	wrong	wrong	wrong	wrong	wrong	wrong						0.493325	0.50397	2	-1.00399	0.0217769	0.00488167	true	wrong	wrong	true	wrong	wrong	wrong	wrong						0.838153	1.4995	2	0.164881	0.593398
Q9H4L4	SENP3	Sentrin-specific protease 3 OS=Homo sapiens GN=SENP3 PE=1 SV=2 - [SENP3_HUMAN]			0.562036	0.368299			2	-1.13616	0.431182	0.0834534	true	wrong	wrong	wrong	wrong	wrong	wrong	wrong				0.49798	0.461581			2	-1.06059	0.0774308	0.0164178	true	wrong	wrong	wrong	wrong	wrong	wrong	wrong				1.21113	1.03837			2	0.16534	0.156996
P33991	MCM4	DNA replication licensing factor MCM4 OS=Homo sapiens GN=MCM4 PE=1 SV=5 - [MCM4_HUMAN]	0.873906	0.91666	0.71398	0.86147	0.748203	0.680416	6	-0.332529	0.176845	0.00290465	true	true	wrong	true	wrong	wrong	wrong	wrong		0.914578	0.859016	0.853568	1.46608	0.654818	0.793778	6	-0.161424	0.387116	0.176954	true	true	wrong	wrong	wrong	wrong	wrong	wrong		1.28701	1.53381	0.924321	0.787857	1.57651	0.89142	6	0.169088	0.431701
P45880	VDAC2	Voltage-dependent anion-selective channel protein 2 OS=Homo sapiens GN=VDAC2 PE=1 SV=2 - [VDAC2_HUMAN]		1.73017	1.15097	1.58111	3.21788	1.38318	5	0.761759	0.562165	0.0193908	true	true	wrong	wrong	wrong	wrong	wrong	wrong			1.66017	1.27642	1.06828	1.73148	1.17992	5	0.441884	0.30653	0.0160875	true	true	wrong	wrong	wrong	wrong	wrong	wrong			1.13301	0.716082	1.38934	1.87606	0.852025	5	0.169885	0.552867
Q9BTT0	ANP32E	Acidic leucine-rich nuclear phosphoprotein 32 family member E OS=Homo sapiens GN=ANP32E PE=1 SV=1 - [AN32E_HUMAN]	1.36073	1.06312	0.560158	1.26138	1.43159	0.944791	6	0.0778786	0.500959	0.359499	true	true	wrong	wrong	wrong	wrong	wrong	wrong		0.584699	0.516105	1.01006	0.580386	0.584739	1.03209	6	-0.537924	0.44532	0.0157802	true	true	wrong	wrong	wrong	wrong	wrong	wrong		2.08568	1.84502	0.380198	1.81729	1.33572	0.572313	6	0.170544	1.024
Q02790	FKBP4	Peptidyl-prolyl cis-trans isomerase FKBP4 OS=Homo sapiens GN=FKBP4 PE=1 SV=3 - [FKBP4_HUMAN]	1.72132			2.07759		1.14071	3	0.676118	0.442375	0.0589864	true	true	wrong	wrong	wrong	wrong	wrong	wrong		2.85068		11.2228	4.30041		6.89398	4	2.47237	0.854242	0.00512806	true	true	true	wrong	wrong	wrong	wrong	wrong		2.15732			1.60891		0.41159	3	0.171534	1.27536
O75179	ANKRD17	Ankyrin repeat domain-containing protein 17 OS=Homo sapiens GN=ANKRD17 PE=1 SV=3 - [ANR17_HUMAN]			0.609635			0.612981	2	-0.710035	0.00558316	0.00176983	true	wrong	wrong	true	wrong	wrong	wrong	wrong				0.419869	0.436905		0.273429	3	-1.43912	0.374912	0.0109414	true	true	wrong	wrong	wrong	wrong	wrong	wrong				0.953127			1.3367	2	0.174707	0.345022
P05198	EIF2S1	Eukaryotic translation initiation factor 2 subunit 1 OS=Homo sapiens GN=EIF2S1 PE=1 SV=3 - [IF2A_HUMAN]	0.62478	0.72481	0.721004	0.626197	0.428596	0.695612	6	-0.672682	0.285679	0.00110061	true	true	wrong	true	wrong	wrong	wrong	wrong		0.728928	0.754049	0.66518	0.855155	0.469738	0.577956	6	-0.593064	0.308025	0.00263023	true	true	wrong	true	wrong	wrong	wrong	wrong		1.11723	1.33693	1.09075	0.953289	1.25523	1.06409	6	0.175456	0.174598
Q9H3U1	UNC45A	Protein unc-45 homolog A OS=Homo sapiens GN=UNC45A PE=1 SV=1 - [UN45A_HUMAN]	0.505145	0.581728	0.817591		0.53531	0.433428	5	-0.833011	0.340589	0.00271899	true	true	wrong	true	wrong	wrong	wrong	wrong		0.380754	0.412762	0.391104		0.503471	0.35595	5	-1.30087	0.19003	5.3123e-05	true	true	wrong	true	wrong	wrong	wrong	wrong		1.30209	1.24698	1.33318		1.01788	0.833961	5	0.17555	0.288847
O00541	PES1	Pescadillo homolog OS=Homo sapiens GN=PES1 PE=1 SV=1 - [PESC_HUMAN]	0.818793	0.675028	1.04839	0.818086	0.745864	2.59031	6	-0.021133	0.714837	0.472539	true	true	wrong	wrong	wrong	wrong	wrong	wrong		0.833339	0.628837	0.522464	1.12722	0.885051		5	-0.374453	0.434191	0.0630221	true	true	wrong	wrong	wrong	wrong	wrong	wrong		0.911194	0.994715	1.42803	0.872728	0.830213	2.24348	6	0.17885	0.558557
P27348	YWHAQ	14-3-3 protein theta OS=Homo sapiens GN=YWHAQ PE=1 SV=1 - [1433T_HUMAN]		1.59879	0.698497	3.65875	1.12159	0.38773	5	0.165866	1.22336	0.388437	true	true	wrong	wrong	wrong	wrong	wrong	wrong			1.97801	2.87346		1.84436	3.81736	4	1.33064	0.489776	0.00611778	true	true	true	wrong	wrong	wrong	wrong	wrong			2.27866	0.491814	2.24699	1.75754	0.420213	5	0.179023	1.2135
Q13885	TUBB2A	Tubulin beta-2A chain OS=Homo sapiens GN=TUBB2A PE=1 SV=1 - [TBB2A_HUMAN]	0.488672	0.470873	0.550485	0.382547	0.354373	0.428541	6	-1.18105	0.235186	3.14291e-05	true	true	wrong	true	wrong	wrong	wrong	wrong		0.635913	0.626956	0.528401	0.456365	0.311059	0.344625	6	-1.10006	0.435355	0.000802877	true	true	wrong	true	wrong	wrong	wrong	wrong		1.06406	1.04222	1.10745	1.0827	1.32276	1.19841	6	0.179298	0.130043
P33992	MCM5	DNA replication licensing factor MCM5 OS=Homo sapiens GN=MCM5 PE=1 SV=5 - [MCM5_HUMAN]	0.831189	1.03331	0.959203	0.757207	0.980017		5	-0.141988	0.185769	0.0813082	true	true	wrong	wrong	wrong	wrong	true	wrong		0.842513	0.744443	0.864512	0.798969	0.873439		5	-0.280409	0.0952887	0.0013807	true	true	wrong	true	wrong	wrong	true	wrong		1.06223	1.49326	1.11201	0.903056	1.17887		5	0.181806	0.26382
Q14671	PUM1	Pumilio homolog 1 OS=Homo sapiens GN=PUM1 PE=1 SV=3 - [PUM1_HUMAN]					0.387842	0.619146	2	-1.02905	0.477163	0.100851	true	wrong	wrong	wrong	wrong	wrong	wrong	wrong						0.488089	0.536502	2	-0.966564	0.0964774	0.022429	true	wrong	wrong	wrong	wrong	wrong	wrong	wrong						1.11561	1.15538	2	0.183099	0.0357303
P19367	HK1	Hexokinase-1 OS=Homo sapiens GN=HK1 PE=1 SV=3 - [HXK1_HUMAN]					0.692015		1	-0.531124	n.a.	n.a.	true	wrong	wrong	wrong	wrong	wrong	wrong	wrong						0.583441		1	-0.777343	n.a.	n.a.	true	wrong	wrong	wrong	wrong	wrong	wrong	wrong						1.13568		1	0.183551	n.a.
P09661	SNRPA1	U2 small nuclear ribonucleoprotein A' OS=Homo sapiens GN=SNRPA1 PE=1 SV=2 - [RU2A_HUMAN]	0.643612			1.09149	0.603986	0.984976	4	-0.314673	0.429591	0.119579	true	true	wrong	wrong	wrong	wrong	wrong	wrong		0.711174			1.04389	0.64755	0.910002	4	-0.298189	0.317032	0.0782601	true	true	wrong	wrong	wrong	wrong	wrong	wrong		1.17271			1.2635	1.15187	0.976829	4	0.184356	0.156509
Q16630	CPSF6	Cleavage and polyadenylation specificity factor subunit 6 OS=Homo sapiens GN=CPSF6 PE=1 SV=2 - [CPSF6_HUMAN]	0.834757		0.935561				2	-0.178334	0.116301	0.137535	true	wrong	wrong	wrong	wrong	wrong	wrong	wrong		1.00695		1.40954				2	0.25261	0.343106	0.243575	true	wrong	wrong	wrong	wrong	wrong	wrong	wrong		1.41425		0.913178				2	0.184504	0.446235
Q9Y4P3	TBL2	Transducin beta-like protein 2 OS=Homo sapiens GN=TBL2 PE=1 SV=1 - [TBL2_HUMAN]	0.973255	1.25763					2	0.1458	0.261502	0.287469	true	wrong	wrong	wrong	wrong	wrong	wrong	wrong		0.759303	0.873475		0.662721		0.683467	4	-0.433749	0.179889	0.00849565	true	true	wrong	wrong	wrong	wrong	wrong	wrong		1.1699	1.107					2	0.186521	0.0563723
P30040	ERP29	Endoplasmic reticulum resident protein 29 OS=Homo sapiens GN=ERP29 PE=1 SV=4 - [ERP29_HUMAN]	1.16361	1.87825	0.863623	1.2978		0.992355	5	0.256292	0.427972	0.125789	true	true	wrong	wrong	wrong	wrong	wrong	wrong		0.559856	1.03537	1.46606	0.822951		1.26911	5	-0.034418	0.547455	0.447499	true	true	wrong	wrong	wrong	wrong	wrong	wrong		1.72946	1.95269	0.613092	1.58404		0.584127	5	0.187584	0.854542
Q7Z4H7	HAUS6	HAUS augmin-like complex subunit 6 OS=Homo sapiens GN=HAUS6 PE=1 SV=2 - [HAUS6_HUMAN]		0.252782	0.417865		0.282464	0.478947	4	-1.53221	0.441568	0.0030679	true	true	wrong	true	wrong	wrong	wrong	wrong			0.295281	0.218502		0.402583	0.214544	4	-1.87185	0.42852	0.00157882	true	true	wrong	true	wrong	wrong	wrong	wrong			0.913303	1.54964		0.724126	1.64163	4	0.187634	0.578474
P08107	HSPA1A	Heat shock 70 kDa protein 1A/1B OS=Homo sapiens GN=HSPA1A PE=1 SV=5 - [HSP71_HUMAN]	0.206051	0.137636	0.21015	0.198944	0.137716	0.205168	6	-2.47757	0.297812	2.63232e-06	true	true	wrong	true	wrong	wrong	wrong	wrong		0.315798	0.204616	0.210365	0.334039	0.200358	0.194103	6	-2.07789	0.355766	1.50361e-05	true	true	wrong	true	wrong	wrong	wrong	wrong		1.13028	1.20189	1.31079	0.945506	1.05975	1.23183	6	0.189351	0.169085
P38919	EIF4A3	Eukaryotic initiation factor 4A-III OS=Homo sapiens GN=EIF4A3 PE=1 SV=4 - [IF4A3_HUMAN]	1.21566	1.20637	0.763292	0.986397	0.924932	0.286034	6	-0.295894	0.781402	0.198105	true	true	wrong	wrong	wrong	wrong	wrong	wrong		0.908231	0.846918	1.11549	0.793779	0.567377	0.90691	6	-0.252112	0.322378	0.056784	true	true	wrong	wrong	wrong	wrong	wrong	wrong		1.80029	1.90689	0.703209	1.51078	2.43414	0.247725	6	0.189499	1.23965
P36542	ATP5C1	ATP synthase subunit gamma, mitochondrial OS=Homo sapiens GN=ATP5C1 PE=1 SV=1 - [ATPG_HUMAN]		0.917101	0.939166	1.24804	1.06176	0.743572	5	-0.0473475	0.276113	0.360451	true	true	wrong	wrong	wrong	wrong	wrong	wrong			1.04132	0.814244	1.83666	0.761323	0.665762	5	-0.0682621	0.578044	0.40239	true	true	wrong	wrong	wrong	wrong	wrong	wrong			1.05478	1.05922		1.62793	0.931428	4	0.190124	0.352601
P62280	RPS11	40S ribosomal protein S11 OS=Homo sapiens GN=RPS11 PE=1 SV=3 - [RS11_HUMAN]	0.633781	0.974092	1.24561	0.525279	0.986962	1.18381	6	-0.180549	0.502296	0.209456	true	true	wrong	wrong	wrong	wrong	wrong	wrong		0.868998	1.18342	0.420233	0.859848	1.22235	0.354014	6	-0.439446	0.75914	0.107704	true	true	wrong	wrong	wrong	wrong	wrong	wrong		0.742965	0.885438	2.46061	0.661426	0.853859	2.47136	6	0.195979	0.869821
P55196	MLLT4	Afadin OS=Homo sapiens GN=MLLT4 PE=1 SV=3 - [AFAD_HUMAN]	0.46894	0.248577	0.4487	0.371158	0.142826	0.474809	6	-1.59485	0.690577	0.00119933	true	true	wrong	true	wrong	wrong	wrong	wrong		0.588142	0.345206	0.238412	0.597448	0.401832	0.177289	6	-1.48716	0.701585	0.00174476	true	true	wrong	true	wrong	wrong	wrong	wrong		1.05914	1.01961	1.97372	0.713059	0.590746	2.51658	6	0.196	0.815705
Q9Y2L1	DIS3	Exosome complex exonuclease RRP44 OS=Homo sapiens GN=DIS3 PE=1 SV=2 - [RRP44_HUMAN]	1.0701	1.21603	1.07542		1.11688	0.703834	5	0.02752	0.307638	0.425608	true	true	wrong	wrong	wrong	wrong	wrong	wrong		0.865476	0.753122	0.875094		0.819483	0.68445	5	-0.328833	0.149031	0.00392568	true	true	wrong	true	wrong	wrong	wrong	wrong		1.22411	1.61773	0.994562		1.25992	0.795285	5	0.196141	0.385588
P36873	PPP1CC	Serine/threonine-protein phosphatase PP1-gamma catalytic subunit OS=Homo sapiens GN=PPP1CC PE=1 SV=1 - [PP1G_HUMAN]		0.42513	0.69987		0.390737		3	-1.03487	0.454447	0.0293397	true	true	wrong	wrong	wrong	wrong	wrong	wrong			0.512712	0.313777		0.453831		3	-1.25858	0.368846	0.0137277	true	true	wrong	wrong	wrong	wrong	wrong	wrong			0.860385	1.77393	1.29456	0.872167		4	0.196283	0.501484
Q8WUQ7	C19orf29	Uncharacterized protein C19orf29 OS=Homo sapiens GN=C19orf29 PE=1 SV=3 - [CS029_HUMAN]			0.873043				1	-0.195875	n.a.	n.a.	true	wrong	wrong	wrong	wrong	wrong	wrong	wrong				0.574327				1	-0.800055	n.a.	n.a.	true	wrong	wrong	wrong	wrong	wrong	wrong	wrong				1.14614				1	0.196789	n.a.
P54136	RARS	Arginine--tRNA ligase, cytoplasmic OS=Homo sapiens GN=RARS PE=1 SV=2 - [SYRC_HUMAN]	0.558476	0.689865	0.715902	0.597573	0.655893	0.60913	6	-0.654112	0.135648	3.82757e-05	true	true	wrong	true	wrong	wrong	wrong	wrong		0.537604	0.5725	0.463129	0.513583	0.521237	0.398751	6	-1.00638	0.185867	2.17768e-05	true	true	wrong	true	wrong	wrong	wrong	wrong		1.05283	1.21622	1.36154	1.07358	1.19433	1.02001	6	0.198188	0.157976
P25205	MCM3	DNA replication licensing factor MCM3 OS=Homo sapiens GN=MCM3 PE=1 SV=3 - [MCM3_HUMAN]	1.04996	1.44496	1.25458		1.27763	0.804771	5	0.193738	0.327667	0.128333	true	true	wrong	wrong	wrong	wrong	true	wrong		1.05565	1.0714	1.10535		0.740234	0.852495	5	-0.0684103	0.252391	0.288585	true	true	wrong	wrong	wrong	wrong	true	wrong		1.14962	1.55897	0.958834		1.65962	0.698398	5	0.198814	0.514589
Q9NQX3	GPHN	Gephyrin OS=Homo sapiens GN=GPHN PE=1 SV=1 - [GEPH_HUMAN]	0.462626	0.423655			0.164723		3	-1.651	0.825932	0.0371245	true	true	wrong	wrong	wrong	wrong	wrong	wrong		0.365769	0.321099	0.356959		0.236965		4	-1.66333	0.28775	0.000694842	true	true	wrong	true	wrong	wrong	wrong	wrong		1.3924	1.45417			0.74791		3	0.199568	0.536666
Q15020	SART3	Squamous cell carcinoma antigen recognized by T-cells 3 OS=Homo sapiens GN=SART3 PE=1 SV=1 - [SART3_HUMAN]	0.22076	0.125535	0.204935		0.119555	0.264844	5	-2.48822	0.512327	0.000204012	true	true	wrong	true	wrong	wrong	wrong	wrong		0.472598	0.250762	0.254586		0.236034	0.249115	5	-1.82775	0.419299	0.000310264	true	true	wrong	true	wrong	wrong	wrong	wrong		0.977918	1.01331	1.3544		0.998134	1.49514	5	0.200422	0.286721
P62829	RPL23	60S ribosomal protein L23 OS=Homo sapiens GN=RPL23 PE=1 SV=1 - [RL23_HUMAN]	0.77467	0.518722		0.913336	0.553105	1.23691	5	-0.398746	0.519273	0.0805516	true	true	wrong	wrong	wrong	wrong	wrong	wrong		0.433001	0.572976		0.409257	0.585465	0.276657	5	-1.18522	0.440029	0.00191438	true	true	wrong	true	wrong	wrong	wrong	wrong		1.1618	0.739764		1.35621	0.732456	2.35901	5	0.202017	0.699994
Q12906	ILF3	Interleukin enhancer-binding factor 3 OS=Homo sapiens GN=ILF3 PE=1 SV=3 - [ILF3_HUMAN]	0.760962	0.76304	0.420704	0.685801	0.628915	0.6237	6	-0.654613	0.317601	0.00196884	true	true	wrong	true	wrong	wrong	wrong	wrong		0.603365	0.686275	0.511026	0.664629	0.556651	0.572978	6	-0.746425	0.160391	4.54678e-05	true	true	wrong	true	wrong	wrong	wrong	wrong		1.50672	1.5768	0.901496	0.828911	1.34427	0.983747	6	0.205212	0.401783
Q99798	ACO2	Aconitate hydratase, mitochondrial OS=Homo sapiens GN=ACO2 PE=1 SV=2 - [ACON_HUMAN]			0.406276		0.717006	0.167672	3	-1.4519	1.05645	0.0701407	true	true	wrong	wrong	wrong	wrong	wrong	wrong				1.97283		2.58902		2	1.17634	0.277285	0.0525721	true	wrong	true	wrong	wrong	wrong	wrong	wrong				0.556834	2.21697	1.24152		3	0.205338	1.00092
P46821	MAP1B	Microtubule-associated protein 1B OS=Homo sapiens GN=MAP1B PE=1 SV=2 - [MAP1B_HUMAN]	0.561295	0.369567	0.789104	0.448324	0.402883	0.905345	6	-0.870565	0.530346	0.00505615	true	true	wrong	wrong	wrong	wrong	wrong	wrong		0.549081	0.446889	0.294522	0.567938	0.515612	0.189769	6	-1.32667	0.628732	0.00177955	true	true	wrong	true	wrong	wrong	wrong	wrong		0.983008	0.87019	1.97543	0.571355	0.755768	3.22815	6	0.206005	0.940712
Q52LJ0	FAM98B	Protein FAM98B OS=Homo sapiens GN=FAM98B PE=1 SV=1 - [FA98B_HUMAN]	0.983583	1.25588	0.95775				3	0.0808446	0.215501	0.291249	true	true	wrong	wrong	wrong	wrong	wrong	wrong		0.716122	0.785487	0.988442				3	-0.282278	0.239412	0.0889419	true	true	wrong	wrong	wrong	wrong	wrong	wrong		1.34692	1.56652	0.728518				3	0.206756	0.585033
P33240	CSTF2	Cleavage stimulation factor subunit 2 OS=Homo sapiens GN=CSTF2 PE=1 SV=1 - [CSTF2_HUMAN]				0.42267	0.340674	0.693971	3	-1.10766	0.526338	0.033855	true	true	wrong	wrong	wrong	wrong	wrong	wrong					0.629288	0.434577	0.347243	3	-1.13217	0.433169	0.0227454	true	true	wrong	wrong	wrong	wrong	wrong	wrong					0.825121	1.02453	1.8212	3	0.207509	0.590331
P19623	SRM	Spermidine synthase OS=Homo sapiens GN=SRM PE=1 SV=1 - [SPEE_HUMAN]	1.0783			0.970468		0.956188	3	0.000293285	0.0945419	0.4981	true	true	wrong	wrong	wrong	wrong	wrong	wrong		0.620713			0.75247		0.847367	3	-0.445746	0.226619	0.0382068	true	true	wrong	wrong	wrong	wrong	wrong	wrong		1.70411			1.1795		0.76963	3	0.20981	0.573915
P43897	TSFM	Elongation factor Ts, mitochondrial OS=Homo sapiens GN=TSFM PE=1 SV=2 - [EFTS_HUMAN]		0.972104					1	-0.0408178	n.a.	n.a.	true	wrong	wrong	wrong	wrong	wrong	wrong	wrong			0.825135					1	-0.277299	n.a.	n.a.	true	wrong	wrong	wrong	wrong	wrong	wrong	wrong			1.157					1	0.210395	n.a.
Q58FF7	HSP90AB3P	Putative heat shock protein HSP 90-beta-3 OS=Homo sapiens GN=HSP90AB3P PE=5 SV=1 - [H90B3_HUMAN]	1.26439	1.58163	1.33127		1.54866	0.985592	5	0.404546	0.27511	0.0151346	true	true	wrong	wrong	wrong	wrong	wrong	wrong		0.820638	0.64234	1.09242		0.95964	0.871529	5	-0.210813	0.28551	0.0870365	true	true	wrong	wrong	wrong	wrong	wrong	wrong		1.41128	2.15357	0.792913		1.333	0.649396	5	0.212163	0.692593
P62851	RPS25	40S ribosomal protein S25 OS=Homo sapiens GN=RPS25 PE=1 SV=1 - [RS25_HUMAN]		1.01933	0.896956	0.755904	0.917215	0.935596	5	-0.15074	0.157738	0.049719	true	true	wrong	wrong	wrong	wrong	wrong	wrong			0.939827	0.572345	0.840658	0.936045	0.481534	5	-0.458925	0.443389	0.0408175	true	true	wrong	wrong	wrong	wrong	wrong	wrong			1.14221	1.26604	0.883579	1.16124	1.41312	5	0.213625	0.250859
P39023	RPL3	60S ribosomal protein L3 OS=Homo sapiens GN=RPL3 PE=1 SV=2 - [RL3_HUMAN]	0.815709	0.96609	0.982105	0.976937	0.674285	0.575952	6	-0.294651	0.324527	0.0383713	true	true	wrong	wrong	wrong	wrong	wrong	wrong		1.16608	0.957418	0.835492	2.35712	0.841359	1.02705	6	0.154319	0.56058	0.265015	true	true	wrong	wrong	wrong	wrong	wrong	wrong		1.26219	1.69974	1.50784	0.906607	1.13684	0.734959	6	0.215509	0.452228
O43324	EEF1E1	Eukaryotic translation elongation factor 1 epsilon-1 OS=Homo sapiens GN=EEF1E1 PE=1 SV=1 - [MCA3_HUMAN]	0.809158		1.02969	0.766361	0.779236		4	-0.251768	0.198708	0.042561	true	true	wrong	wrong	wrong	wrong	wrong	wrong		0.657219		0.536114	0.70304	0.734493		4	-0.614611	0.200985	0.00439282	true	true	wrong	true	wrong	wrong	wrong	wrong		1.21958		1.45601	1.00637	1.02414		4	0.217998	0.249652
Q8IUD2	ERC1	ELKS/Rab6-interacting/CAST family member 1 OS=Homo sapiens GN=ERC1 PE=1 SV=1 - [RB6I2_HUMAN]	0.512833	0.341178			0.254118	0.996743	4	-1.124	0.853992	0.0390842	true	true	wrong	wrong	wrong	wrong	wrong	wrong		0.502156	0.409348				0.297561	3	-1.34371	0.38048	0.0128499	true	true	wrong	wrong	wrong	wrong	wrong	wrong		0.945907	0.772593				2.16024	3	0.219581	0.785839
P62314	SNRPD1	Small nuclear ribonucleoprotein Sm D1 OS=Homo sapiens GN=SNRPD1 PE=1 SV=1 - [SMD1_HUMAN]	0.758184	0.545633	0.681216	0.612197	0.425463	0.787645	6	-0.6854	0.332037	0.00195612	true	true	wrong	true	wrong	wrong	wrong	wrong		1.04084	0.741618	0.811473	0.947255	0.512589	0.75337	6	-0.354293	0.354847	0.0291232	true	true	wrong	wrong	wrong	wrong	wrong	wrong		1.20216	1.11442	1.06176	0.995474	1.47044	1.20338	6	0.220862	0.195231
O75165	DNAJC13	DnaJ homolog subfamily C member 13 OS=Homo sapiens GN=DNAJC13 PE=1 SV=5 - [DJC13_HUMAN]	1.54349	1.22778					2	0.461122	0.233452	0.109426	true	wrong	wrong	wrong	wrong	wrong	wrong	wrong		1.2593	1.01488					2	0.176964	0.220132	0.229637	true	wrong	wrong	wrong	wrong	wrong	wrong	wrong		1.17429	1.15938					2	0.222571	0.0130387
P35606	COPB2	Coatomer subunit beta' OS=Homo sapiens GN=COPB2 PE=1 SV=2 - [COPB2_HUMAN]	0.417068	0.343488	0.427354	0.388253	0.336947	0.367198	6	-1.40159	0.142328	1.14101e-06	true	true	wrong	true	wrong	wrong	wrong	wrong		0.572875	0.431279	0.403541	0.590507	0.387726	0.337412	6	-1.17008	0.322569	0.000150217	true	true	wrong	true	wrong	wrong	wrong	wrong		1.13187	1.32936	1.19433	0.963248	1.26762	1.15174	6	0.222927	0.161
Q9NR30	DDX21	Nucleolar RNA helicase 2 OS=Homo sapiens GN=DDX21 PE=1 SV=5 - [DDX21_HUMAN]	0.444828	0.217501	0.272747	0.382355	0.206435	0.31836	6	-1.75975	0.441493	9.58621e-05	true	true	wrong	true	wrong	wrong	wrong	wrong		0.457307	0.360882	0.226491	0.459158	0.352684	0.194728	6	-1.62143	0.518763	0.000302668	true	true	wrong	true	wrong	wrong	wrong	wrong		1.32983	0.875844	1.41211	1.12292	0.873103	1.58178	6	0.225144	0.361488
P62241	RPS8	40S ribosomal protein S8 OS=Homo sapiens GN=RPS8 PE=1 SV=2 - [RS8_HUMAN]	0.580615	0.821956	0.937432	0.328769	0.746129	0.875157	6	-0.563361	0.564042	0.029092	true	true	wrong	wrong	wrong	wrong	wrong	wrong		0.66007	0.888884	0.502243	0.437716	0.91986	0.434665	6	-0.712876	0.491144	0.00814747	true	true	wrong	wrong	wrong	wrong	wrong	wrong		1.02317	1.08299	1.75019	0.80553	1.0203	1.60277	6	0.225523	0.429554
P62701	RPS4X	40S ribosomal protein S4, X isoform OS=Homo sapiens GN=RPS4X PE=1 SV=2 - [RS4X_HUMAN]	0.572663	0.939566	1.02246	0.51597	0.902358	0.996568	6	-0.328327	0.434157	0.0615836	true	true	wrong	wrong	wrong	wrong	wrong	wrong		0.785688	1.07406	0.427505	0.774102	1.12296	0.415655	6	-0.489919	0.626612	0.0568171	true	true	wrong	wrong	wrong	wrong	wrong	wrong		0.871765	1.06424	2.09472	0.69279	1.00942	1.88587	6	0.226307	0.631848
Q14331	FRG1	Protein FRG1 OS=Homo sapiens GN=FRG1 PE=1 SV=1 - [FRG1_HUMAN]	0.773408	1.11542				1.12397	3	-0.0148352	0.308236	0.470578	true	true	wrong	wrong	wrong	wrong	wrong	wrong		0.870753	1.03537				0.440312	3	-0.444308	0.652146	0.179661	true	true	wrong	wrong	wrong	wrong	wrong	wrong		0.871548	1.05719				1.7436	3	0.227986	0.516312
P49006	MARCKSL1	MARCKS-related protein OS=Homo sapiens GN=MARCKSL1 PE=1 SV=2 - [MRP_HUMAN]	1.15991	1.45635					2	0.378184	0.232177	0.130368	true	wrong	wrong	wrong	wrong	wrong	wrong	wrong		0.576438	0.69822	1.78095				3	-0.160122	0.870806	0.39015	true	true	wrong	wrong	wrong	wrong	wrong	wrong		1.81789	1.88577	0.469947				3	0.22933	1.14239
P62136	PPP1CA	Serine/threonine-protein phosphatase PP1-alpha catalytic subunit OS=Homo sapiens GN=PPP1CA PE=1 SV=1 - [PP1A_HUMAN]		0.356712	0.655752	0.505415	0.357714	0.727245	5	-1.0046	0.478562	0.00467504	true	true	wrong	true	wrong	wrong	wrong	wrong			0.510562	0.401573	0.867815	0.518127	0.360351	5	-0.982359	0.489401	0.00545964	true	true	wrong	wrong	wrong	wrong	wrong	wrong			0.995606	1.78194	0.772651	0.811976	1.99934	5	0.230803	0.643454
Q13435	SF3B2	Splicing factor 3B subunit 2 OS=Homo sapiens GN=SF3B2 PE=1 SV=2 - [SF3B2_HUMAN]						0.762351	1	-0.391473	n.a.	n.a.	true	wrong	wrong	wrong	wrong	wrong	wrong	wrong							0.443089	1	-1.17433	n.a.	n.a.	true	wrong	wrong	wrong	wrong	wrong	wrong	wrong							1.17553	1	0.233308	n.a.
Q15154	PCM1	Pericentriolar material 1 protein OS=Homo sapiens GN=PCM1 PE=1 SV=4 - [PCM1_HUMAN]				1.07162	1.05698	1.83736	3	0.352461	0.454924	0.155836	true	true	wrong	wrong	wrong	wrong	wrong	wrong					0.929642	1.31122	0.538	3	-0.202886	0.648157	0.321017	true	true	wrong	wrong	wrong	wrong	wrong	wrong					1.00127	0.732456	2.2154	3	0.233404	0.823179
Q9UKN7	MYO15A	Unconventional myosin-XV OS=Homo sapiens GN=MYO15A PE=1 SV=2 - [MYO15_HUMAN]		0.936717					1	-0.0943144	n.a.	n.a.	true	wrong	wrong	wrong	wrong	wrong	wrong	wrong			0.780887					1	-0.356814	n.a.	n.a.	true	wrong	wrong	wrong	wrong	wrong	wrong	wrong			1.17564					1	0.233441	n.a.
P55786	NPEPPS	Puromycin-sensitive aminopeptidase OS=Homo sapiens GN=NPEPPS PE=1 SV=2 - [PSA_HUMAN]	0.855148	1.07024	0.869759		1.00676	0.854675	5	-0.109194	0.152386	0.0921757	true	true	wrong	wrong	wrong	wrong	wrong	wrong		0.831067	0.859145	0.709563		0.736322	0.709947	5	-0.383359	0.13105	0.00141155	true	true	wrong	true	wrong	wrong	wrong	wrong		1.13656	1.37417	1.02178		1.45685	0.966135	5	0.233494	0.259767
Q9BVA1	TUBB2B	Tubulin beta-2B chain OS=Homo sapiens GN=TUBB2B PE=1 SV=1 - [TBB2B_HUMAN]	0.46323	0.426607		0.389978	0.357783	0.432665	5	-1.27785	0.144748	1.94227e-05	true	true	wrong	true	wrong	wrong	wrong	wrong		0.566583	0.533388		0.492969	0.279705	0.309887	5	-1.25501	0.473062	0.0020238	true	true	wrong	true	wrong	wrong	wrong	wrong		1.10862	1.08431		0.981926	1.45391	1.31723	5	0.235335	0.228632
P09622	DLD	Dihydrolipoyl dehydrogenase, mitochondrial OS=Homo sapiens GN=DLD PE=1 SV=2 - [DLDH_HUMAN]		1.31229	1.08093	1.41414	1.25007		4	0.331576	0.163493	0.0135017	true	true	wrong	wrong	wrong	wrong	wrong	wrong			1.10091	1.59292	0.878047	0.533767		4	-0.0707434	0.65977	0.421973	true	true	wrong	wrong	wrong	wrong	wrong	wrong			1.31688	0.575232	1.49708	1.69441		4	0.235566	0.704718
Q14789	GOLGB1	Golgin subfamily B member 1 OS=Homo sapiens GN=GOLGB1 PE=1 SV=2 - [GOGB1_HUMAN]	0.834235					0.856529	2	-0.24245	0.0269045	0.0249258	true	wrong	wrong	wrong	wrong	wrong	wrong	wrong		0.894951					0.786079	2	-0.253686	0.132323	0.112474	true	wrong	wrong	wrong	wrong	wrong	wrong	wrong		1.30576					1.06263	2	0.236264	0.210186
Q96ST3	SIN3A	Paired amphipathic helix protein Sin3a OS=Homo sapiens GN=SIN3A PE=1 SV=2 - [SIN3A_HUMAN]			0.966073	0.376734		1.0785	3	-0.449715	0.834018	0.224463	true	true	wrong	wrong	wrong	wrong	wrong	wrong				0.492547	0.913395		0.38598	3	-0.84192	0.640559	0.0752801	true	true	wrong	wrong	wrong	wrong	wrong	wrong				1.63782	0.503357		1.98935	3	0.237908	1.07291
Q9H3K6	BOLA2	BolA-like protein 2 OS=Homo sapiens GN=BOLA2 PE=1 SV=1 - [BOLA2_HUMAN]				0.219151		0.451295	2	-1.66893	0.73691	0.0963301	true	wrong	wrong	wrong	wrong	wrong	wrong	wrong					0.967811		3.40941	2	0.861159	1.28462	0.258489	true	wrong	wrong	wrong	wrong	wrong	wrong	wrong					1.91203	1.94331	0.441862	3	0.238429	1.22701
P08243	ASNS	Asparagine synthetase [glutamine-hydrolyzing] OS=Homo sapiens GN=ASNS PE=1 SV=4 - [ASNS_HUMAN]	0.811546		0.569635	0.875048	0.915084	0.53501	5	-0.46722	0.362691	0.022495	true	true	wrong	wrong	wrong	wrong	wrong	wrong		0.768704		0.978915	0.732132	0.565045	1.24697	5	-0.273041	0.434223	0.116216	true	true	wrong	wrong	wrong	wrong	wrong	wrong		1.46642		0.584693	1.53747	2.07001	0.83886	5	0.238949	0.736563
P46940	IQGAP1	Ras GTPase-activating-like protein IQGAP1 OS=Homo sapiens GN=IQGAP1 PE=1 SV=1 - [IQGA1_HUMAN]	1.12828	1.11735	1.21614	1.10116	0.952267	1.49341	6	0.210601	0.213837	0.0303413	true	true	wrong	wrong	wrong	wrong	wrong	wrong		1.0303	0.955025	1.4385	0.955473	1.02872	0.761611	6	0.0139191	0.296853	0.456515	true	true	wrong	wrong	wrong	wrong	wrong	wrong		1.18429	1.26563	0.926641	0.948132	0.976196	2.11243	6	0.240212	0.449905
Q00059	TFAM	Transcription factor A, mitochondrial OS=Homo sapiens GN=TFAM PE=1 SV=1 - [TFAM_HUMAN]		1.2287			0.612894	0.476737	3	-0.492631	0.707557	0.175576	true	true	wrong	wrong	wrong	wrong	wrong	wrong			1.78814			0.840323	0.678842	3	0.00954069	0.734183	0.492043	true	true	wrong	wrong	wrong	wrong	wrong	wrong			1.30627			1.354	0.931799	3	0.24026	0.297456
P30101	PDIA3	Protein disulfide-isomerase A3 OS=Homo sapiens GN=PDIA3 PE=1 SV=4 - [PDIA3_HUMAN]	1.2684	1.67256	0.962808	1.17495	1.64436	0.801333	6	0.276831	0.420125	0.08372	true	true	wrong	wrong	wrong	wrong	wrong	wrong		0.777017	0.818336	1.51481	0.800033	1.06084	1.30294	6	0.0151712	0.407512	0.465441	true	true	wrong	wrong	wrong	wrong	wrong	wrong		1.71342	2.41484	0.54988	1.35178	1.9187	0.462291	6	0.241309	0.992814
Q9UI12	ATP6V1H	V-type proton ATPase subunit H OS=Homo sapiens GN=ATP6V1H PE=1 SV=1 - [VATH_HUMAN]	0.491862	0.49189			0.545132		3	-0.974196	0.0856268	0.00128263	true	true	wrong	true	wrong	wrong	wrong	wrong		0.405001	0.375388			0.520286		3	-1.22006	0.246428	0.00666376	true	true	wrong	wrong	wrong	wrong	wrong	wrong		1.22234	1.31813			1.02934		3	0.243285	0.182848
Q6RFH5	WDR74	WD repeat-containing protein 74 OS=Homo sapiens GN=WDR74 PE=1 SV=1 - [WDR74_HUMAN]	0.474381	0.49041					2	-1.05191	0.0339015	0.00725271	true	wrong	wrong	wrong	wrong	wrong	wrong	wrong		0.415003	0.37739					2	-1.33734	0.0969196	0.0162977	true	wrong	wrong	wrong	wrong	wrong	wrong	wrong		1.1118	1.26408					2	0.245495	0.130951
Q8IWS0	PHF6	PHD finger protein 6 OS=Homo sapiens GN=PHF6 PE=1 SV=1 - [PHF6_HUMAN]	0.638565	0.867419	0.886225	0.472263	0.801618	0.911764	6	-0.426861	0.371194	0.0186236	true	true	wrong	wrong	wrong	wrong	wrong	wrong		0.675563	0.837177	0.511174	0.380379	0.735797	0.152045	6	-1.05748	0.909779	0.0179715	true	true	wrong	wrong	wrong	wrong	wrong	wrong		0.959121	1.0998	1.39733	1.1748	1.07818	1.50184	6	0.247907	0.243618
Q96GC5	MRPL48	39S ribosomal protein L48, mitochondrial OS=Homo sapiens GN=MRPL48 PE=1 SV=2 - [RM48_HUMAN]	0.735115	0.896048		0.74576		1.00252	4	-0.255475	0.216203	0.049552	true	true	wrong	wrong	wrong	wrong	wrong	wrong		0.653747	0.735024		0.657896		0.47367	4	-0.684862	0.273378	0.00765266	true	true	wrong	wrong	wrong	wrong	wrong	wrong		1.10486	1.1989		1.03947		1.44803	4	0.248879	0.208006
P40429	RPL13A	60S ribosomal protein L13a OS=Homo sapiens GN=RPL13A PE=1 SV=2 - [RL13A_HUMAN]		0.694116	0.923624	1.21072	0.705556	0.969581	5	-0.182648	0.337294	0.1463	true	true	wrong	wrong	wrong	wrong	wrong	wrong			1.13144	0.988778	2.79922	1.61687	0.923458	5	0.445047	0.659679	0.102955	true	true	wrong	wrong	wrong	wrong	wrong	wrong			1.13484	1.41774	0.834281	1.10146	1.61068	5	0.250357	0.365439
Q96JB2	COG3	Conserved oligomeric Golgi complex subunit 3 OS=Homo sapiens GN=COG3 PE=1 SV=3 - [COG3_HUMAN]	1.04404						1	0.0621808	n.a.	n.a.	true	wrong	wrong	wrong	wrong	wrong	wrong	wrong		0.858538						1	-0.220045	n.a.	n.a.	true	wrong	wrong	wrong	wrong	wrong	wrong	wrong		1.18974						1	0.250644	n.a.
P13489	RNH1	Ribonuclease inhibitor OS=Homo sapiens GN=RNH1 PE=1 SV=2 - [RINI_HUMAN]	1.07424	1.37654	0.959908	0.981377	0.901508	0.641616	6	-0.0519336	0.358756	0.368682	true	true	wrong	wrong	wrong	wrong	wrong	wrong		0.978717	0.848303	1.19881	0.925817	0.755901	0.98392	6	-0.0908497	0.224555	0.183594	true	true	wrong	wrong	wrong	wrong	wrong	wrong		1.34013	2.01787	0.780911	1.19722	1.40922	0.799192	6	0.251605	0.523187
P13667	PDIA4	Protein disulfide-isomerase A4 OS=Homo sapiens GN=PDIA4 PE=1 SV=2 - [PDIA4_HUMAN]	1.41364	1.70932	0.738403	1.16868	1.42095	0.723177	6	0.183245	0.522236	0.214671	true	true	wrong	wrong	wrong	wrong	wrong	wrong		0.86547	0.938547	1.37428	0.89139	0.786237	1.25948	6	-0.00354612	0.322738	0.489785	true	true	wrong	wrong	wrong	wrong	wrong	wrong		1.97148	2.28402	0.470446	1.35947	2.15714	0.463585	6	0.254338	1.07989
Q8WUA4	GTF3C2	General transcription factor 3C polypeptide 2 OS=Homo sapiens GN=GTF3C2 PE=1 SV=2 - [TF3C2_HUMAN]	0.802451		0.98535				2	-0.169403	0.209462	0.228687	true	wrong	wrong	wrong	wrong	wrong	wrong	wrong		0.898768		0.611005				2	-0.432362	0.393693	0.18209	true	wrong	wrong	wrong	wrong	wrong	wrong	wrong		1.01344		1.40621				2	0.25554	0.334146
P25789	PSMA4	Proteasome subunit alpha type-4 OS=Homo sapiens GN=PSMA4 PE=1 SV=1 - [PSA4_HUMAN]					0.315342	0.432979	2	-1.43632	0.323415	0.050259	true	wrong	wrong	wrong	true	wrong	wrong	wrong						0.662885	0.849172	2	-0.41452	0.252648	0.129528	true	wrong	wrong	wrong	wrong	wrong	wrong	wrong						1.60154	0.893759	2	0.258708	0.595029
P23528	CFL1	Cofilin-1 OS=Homo sapiens GN=CFL1 PE=1 SV=3 - [COF1_HUMAN]	2.47876	2.9742	1.65617	2.31882	3.08426	0.892634	6	1.0474	0.674512	0.00629074	true	true	true	wrong	wrong	wrong	wrong	wrong		1.03591	1.00382	1.79039	1.0014	1.16616	1.32921	6	0.255175	0.32734	0.0572312	true	true	wrong	wrong	wrong	wrong	wrong	wrong		2.0225	2.50423	0.598875	1.82537	1.35024	0.393505	6	0.259449	1.06599
P22102	GART	Trifunctional purine biosynthetic protein adenosine-3 OS=Homo sapiens GN=GART PE=1 SV=1 - [PUR2_HUMAN]	0.885745	0.969796		1.07959	1.00676	0.83437	5	-0.0720662	0.147627	0.168183	true	true	wrong	wrong	wrong	wrong	wrong	wrong		0.704585	0.676109		1.07377	0.711052	0.730751	5	-0.382332	0.274101	0.0177805	true	true	wrong	wrong	wrong	wrong	wrong	wrong		1.38464	1.53485		1.00618	1.45341	0.796888	5	0.261679	0.405732
P14625	HSP90B1	Endoplasmin OS=Homo sapiens GN=HSP90B1 PE=1 SV=1 - [ENPL_HUMAN]	1.17271	1.60877	0.964638	0.930914	1.43981	1.31583	6	0.280407	0.315694	0.040777	true	true	wrong	wrong	wrong	wrong	wrong	wrong		0.768153	0.844722	1.28961	0.738152	0.80981	1.36193	6	-0.092293	0.392604	0.29484	true	true	wrong	wrong	wrong	wrong	wrong	wrong		1.54382	1.87152	0.571437	1.20944	2.7122	0.55064	6	0.262728	0.931243
Q9NVN8	GNL3L	Guanine nucleotide-binding protein-like 3-like protein OS=Homo sapiens GN=GNL3L PE=1 SV=1 - [GNL3L_HUMAN]	0.498037		0.666831	0.507658	0.543489	0.428588	5	-0.934074	0.231971	0.000421209	true	true	wrong	true	wrong	wrong	wrong	wrong		0.702496		0.387043	0.604163	0.708818	0.253653	5	-1.01629	0.644674	0.0121697	true	true	wrong	wrong	wrong	wrong	wrong	wrong		0.951469		1.65285	1.01003	1.0666	1.46988	5	0.263262	0.354204
P29401	TKT	Transketolase OS=Homo sapiens GN=TKT PE=1 SV=3 - [TKT_HUMAN]	0.941832	1.37462	0.420039	0.9051	1.08095	0.650471	6	-0.255139	0.601977	0.173381	true	true	wrong	wrong	wrong	wrong	wrong	wrong		0.819083	0.637025	1.05393	0.797177	0.683709	0.934248	6	-0.306068	0.271036	0.0197739	true	true	wrong	wrong	wrong	wrong	wrong	wrong		1.59235	2.72285	0.377654	1.96701	2.05061	0.453174	6	0.263601	1.21864
P14314	PRKCSH	Glucosidase 2 subunit beta OS=Homo sapiens GN=PRKCSH PE=1 SV=2 - [GLU2B_HUMAN]					1.82129	0.771398	2	0.245255	0.876398	0.380046	true	wrong	wrong	wrong	wrong	wrong	wrong	wrong				5.92878		2.58374	5.37113	3	2.12081	0.654574	0.0151585	true	true	true	wrong	wrong	wrong	wrong	wrong						3.54819	0.407552	2	0.266069	2.20761
Q9H8E8	CSRP2BP	Cysteine-rich protein 2-binding protein OS=Homo sapiens GN=CSRP2BP PE=1 SV=3 - [CSR2B_HUMAN]	1.31521						1	0.395289	n.a.	n.a.	true	wrong	wrong	wrong	wrong	wrong	wrong	wrong		1.07107						1	0.0990463	n.a.	n.a.	true	wrong	wrong	wrong	wrong	wrong	wrong	wrong		1.20435						1	0.268256	n.a.
P39019	RPS19	40S ribosomal protein S19 OS=Homo sapiens GN=RPS19 PE=1 SV=2 - [RS19_HUMAN]	0.960499	1.31491	0.966292	0.939654	1.26758	1.03668	6	0.0986004	0.215069	0.156225	true	true	wrong	wrong	wrong	wrong	wrong	wrong		0.818989	0.981162	0.729051	0.854881	0.987666	0.655496	6	-0.270813	0.234241	0.0182958	true	true	wrong	wrong	wrong	wrong	wrong	wrong		1.19879	1.40605	1.14637	1.04969	1.33523	1.14061	6	0.271194	0.156579
O15226	NKRF	NF-kappa-B-repressing factor OS=Homo sapiens GN=NKRF PE=1 SV=2 - [NKRF_HUMAN]			1.02534		1.28221		2	0.197369	0.228057	0.218059	true	wrong	wrong	wrong	wrong	wrong	wrong	wrong				1.33318		1.22571		2	0.354242	0.0857409	0.0539555	true	wrong	wrong	wrong	wrong	wrong	wrong	wrong				0.919215		1.58834		2	0.272996	0.557938
P0DI83	RAB34	Ras-related protein Rab-34, isoform NARR OS=Homo sapiens GN=RAB34 PE=1 SV=1 - [NARR_HUMAN]	0.708916	0.838978					2	-0.374805	0.17184	0.099791	true	wrong	wrong	wrong	wrong	wrong	wrong	wrong		0.518696	0.702338					2	-0.728401	0.309202	0.0928211	true	wrong	wrong	wrong	wrong	wrong	wrong	wrong		1.33708	1.09518					2	0.275124	0.203593
Q8NE71	ABCF1	ATP-binding cassette sub-family F member 1 OS=Homo sapiens GN=ABCF1 PE=1 SV=2 - [ABCF1_HUMAN]	0.756343	0.863699	0.665038		0.897002	0.941947	5	-0.289175	0.204483	0.0170561	true	true	wrong	wrong	wrong	wrong	wrong	wrong		0.782576	0.771889	0.711363		0.964834	0.688798	5	-0.361614	0.18985	0.00653143	true	true	wrong	wrong	wrong	wrong	wrong	wrong		1.19125	1.60156	0.88694		1.31784	1.17366	5	0.277611	0.309017
P62318	SNRPD3	Small nuclear ribonucleoprotein Sm D3 OS=Homo sapiens GN=SNRPD3 PE=1 SV=1 - [SMD3_HUMAN]	0.811563	0.867292	0.695119	0.720068	0.865588	1.49577	6	-0.188742	0.399937	0.149959	true	true	wrong	wrong	wrong	wrong	wrong	wrong		0.735126	0.708976	0.596553	0.663517	0.699392	0.49916	6	-0.632575	0.209269	0.000353609	true	true	wrong	true	wrong	wrong	wrong	wrong		1.16136	1.28686	1.29027	0.958445	1.32097	1.30778	6	0.279139	0.179741
Q9BUQ8	DDX23	Probable ATP-dependent RNA helicase DDX23 OS=Homo sapiens GN=DDX23 PE=1 SV=3 - [DDX23_HUMAN]	0.453904						1	-1.13954	n.a.	n.a.	true	wrong	wrong	wrong	wrong	wrong	wrong	wrong		0.366342						1	-1.44874	n.a.	n.a.	true	wrong	wrong	wrong	wrong	wrong	wrong	wrong		1.21414						1	0.279938	n.a.
Q09028	RBBP4	Histone-binding protein RBBP4 OS=Homo sapiens GN=RBBP4 PE=1 SV=3 - [RBBP4_HUMAN]	0.945134	0.748497		0.767974	0.643926	1.49421	5	-0.187173	0.471736	0.212545	true	true	wrong	wrong	wrong	wrong	wrong	wrong		0.774607	0.603387		0.684294	0.657273	0.409973	5	-0.707291	0.348784	0.0052707	true	true	wrong	wrong	wrong	wrong	wrong	wrong		1.14747	1.1533		0.88259	0.948499	2.38783	5	0.280691	0.570714
O60763	USO1	General vesicular transport factor p115 OS=Homo sapiens GN=USO1 PE=1 SV=2 - [USO1_HUMAN]	0.833559	0.728477	0.759065		0.70131	0.810399	5	-0.386513	0.103784	0.000568076	true	true	wrong	true	wrong	wrong	wrong	wrong		0.779662	0.662128	0.763582		0.598878	0.783436	5	-0.486964	0.172915	0.0016249	true	true	wrong	true	wrong	wrong	wrong	wrong		1.58129	1.3904	0.951913		1.44414	0.877436	5	0.281415	0.383712
Q9HD42	CHMP1A	Charged multivesicular body protein 1a OS=Homo sapiens GN=CHMP1A PE=1 SV=1 - [CHM1A_HUMAN]				0.512258		0.95795	2	-0.513517	0.638574	0.229586	true	wrong	wrong	wrong	wrong	wrong	wrong	wrong					0.64523		0.740296	2	-0.53297	0.140212	0.058544	true	wrong	wrong	wrong	wrong	wrong	wrong	wrong					1.1027		1.34185	2	0.282633	0.20024
P17980	PSMC3	26S protease regulatory subunit 6A OS=Homo sapiens GN=PSMC3 PE=1 SV=3 - [PRS6A_HUMAN]	0.575546			0.496662	0.297785	0.437143	4	-1.18703	0.407404	0.00503279	true	true	wrong	wrong	true	wrong	wrong	wrong		0.400258			0.40466	0.318968	0.329204	4	-1.46942	0.181563	0.000256485	true	true	wrong	true	wrong	wrong	wrong	wrong		1.59665			1.25155	1.07621	1.02533	4	0.285203	0.287312
P15153	RAC2	Ras-related C3 botulinum toxin substrate 2 OS=Homo sapiens GN=RAC2 PE=1 SV=1 - [RAC2_HUMAN]	1.27486						1	0.350333	n.a.	n.a.	true	wrong	wrong	wrong	wrong	wrong	wrong	wrong		1.02517						1	0.0358601	n.a.	n.a.	true	wrong	wrong	wrong	wrong	wrong	wrong	wrong		1.21905						1	0.285761	n.a.
P12235	SLC25A4	ADP/ATP translocase 1 OS=Homo sapiens GN=SLC25A4 PE=1 SV=4 - [ADT1_HUMAN]	0.567833	0.636875		0.394593			3	-0.936313	0.360585	0.0230245	true	true	wrong	wrong	wrong	wrong	wrong	wrong		0.581395	0.597867		0.375215			3	-0.979574	0.376944	0.0229902	true	true	wrong	wrong	wrong	wrong	wrong	wrong		1.18489	1.29345		1.18893			3	0.288547	0.0716461
Q9H0E3	SAP130	Histone deacetylase complex subunit SAP130 OS=Homo sapiens GN=SAP130 PE=1 SV=1 - [SP130_HUMAN]					0.457973	1.07732	2	-0.509611	0.872648	0.280264	true	wrong	wrong	wrong	wrong	wrong	wrong	wrong						0.673679	0.328095	2	-1.08884	0.73394	0.141577	true	wrong	wrong	wrong	wrong	wrong	wrong	wrong						0.658693	2.26551	2	0.288757	1.26018
Q9BPX3	NCAPG	Condensin complex subunit 3 OS=Homo sapiens GN=NCAPG PE=1 SV=1 - [CND3_HUMAN]	0.526038	0.469224	0.559522			0.516293	4	-0.952472	0.105196	0.000183674	true	true	wrong	true	wrong	wrong	wrong	wrong		0.635545	0.555463	0.438475			0.298237	4	-1.10927	0.478417	0.00944809	true	true	wrong	wrong	wrong	wrong	wrong	wrong		1.07243	1.01121	1.23746			1.66977	4	0.290996	0.323149
P62249	RPS16	40S ribosomal protein S16 OS=Homo sapiens GN=RPS16 PE=1 SV=2 - [RS16_HUMAN]	0.768239	1.07748	0.974979	0.692054	1.07134	1.01218	6	-0.120571	0.269289	0.161375	true	true	wrong	wrong	wrong	wrong	wrong	wrong		0.751389	0.922701	0.479594	0.734583	0.902597	0.421222	6	-0.571457	0.474077	0.0158941	true	true	wrong	wrong	wrong	wrong	wrong	wrong		1.04145	1.26893	1.53197	0.856951	1.20498	1.6304	6	0.294852	0.345802
P62269	RPS18	40S ribosomal protein S18 OS=Homo sapiens GN=RPS18 PE=1 SV=3 - [RS18_HUMAN]	0.873261	1.37905	1.16876	0.780884	1.31993	1.09638	6	0.11159	0.326937	0.220616	true	true	wrong	wrong	wrong	wrong	wrong	wrong		0.853035	1.01935	0.52777	0.840193	0.998727	0.432429	6	-0.431033	0.512768	0.0472742	true	true	wrong	wrong	wrong	wrong	wrong	wrong		0.991271	1.27735	1.7154	0.800278	1.18648	1.65843	6	0.295688	0.425022
O75717	WDHD1	WD repeat and HMG-box DNA-binding protein 1 OS=Homo sapiens GN=WDHD1 PE=1 SV=1 - [WDHD1_HUMAN]						0.464204	1	-1.10717	n.a.	n.a.	true	wrong	wrong	wrong	wrong	wrong	wrong	wrong							0.258178	1	-1.95356	n.a.	n.a.	true	wrong	wrong	wrong	wrong	wrong	wrong	wrong							1.22812	1	0.296449	n.a.
O00442	RTCD1	RNA 3'-terminal phosphate cyclase OS=Homo sapiens GN=RTCD1 PE=1 SV=1 - [RTC1_HUMAN]		0.562082				0.484469	2	-0.938336	0.151587	0.0362042	true	wrong	wrong	wrong	wrong	wrong	wrong	wrong			1.22427				1.27211	2	0.319567	0.0391051	0.0274742	true	wrong	wrong	wrong	wrong	wrong	wrong	wrong			1.22859					1	0.297008	n.a.
Q9Y285	FARSA	Phenylalanine--tRNA ligase alpha subunit OS=Homo sapiens GN=FARSA PE=1 SV=3 - [SYFA_HUMAN]	0.835165	1.0681		0.545555	1.02697	0.85389	5	-0.245701	0.384822	0.113282	true	true	wrong	wrong	wrong	wrong	wrong	wrong		0.72971	0.750972		0.829504	0.851355	0.377844	5	-0.554752	0.483957	0.0312143	true	true	wrong	wrong	wrong	wrong	wrong	wrong		1.10433	1.39855		0.924219	1.21254	1.61977	5	0.297445	0.310912
P55084	HADHB	Trifunctional enzyme subunit beta, mitochondrial OS=Homo sapiens GN=HADHB PE=1 SV=3 - [ECHB_HUMAN]	0.98878			0.867051	1.6946	0.905232	4	0.0988041	0.448422	0.344635	true	true	wrong	wrong	wrong	wrong	wrong	wrong		0.861833			0.842368	1.3258	0.771861	4	-0.107181	0.349483	0.291501	true	true	wrong	wrong	wrong	wrong	wrong	wrong		1.29409			1.14625	1.41317	1.097	4	0.300337	0.166409
P61088	UBE2N	Ubiquitin-conjugating enzyme E2 N OS=Homo sapiens GN=UBE2N PE=1 SV=1 - [UBE2N_HUMAN]	1.10887	1.67106	0.974172	1.05847	2.08884	0.934797	6	0.316583	0.472556	0.0808597	true	true	wrong	wrong	wrong	wrong	wrong	wrong		0.64784	0.824755	1.36412	0.751559	0.930928	1.18266	6	-0.121591	0.405092	0.247609	true	true	wrong	wrong	wrong	wrong	wrong	wrong		1.60003	2.12063	0.573559	1.37493	2.28969	0.577004	6	0.303628	0.893843
P23588	EIF4B	Eukaryotic translation initiation factor 4B OS=Homo sapiens GN=EIF4B PE=1 SV=2 - [IF4B_HUMAN]		0.595051	0.651863				2	-0.683137	0.0930226	0.0305548	true	wrong	wrong	wrong	wrong	wrong	wrong	wrong			0.600353	0.649121				2	-0.679779	0.0796755	0.0263209	true	wrong	wrong	wrong	wrong	wrong	wrong	wrong			1.4033	1.08913				2	0.305997	0.258555
Q14684	RRP1B	Ribosomal RNA processing protein 1 homolog B OS=Homo sapiens GN=RRP1B PE=1 SV=3 - [RRP1B_HUMAN]		0.454941	0.640178	0.726174		0.529661	4	-0.789544	0.297375	0.00652062	true	true	wrong	wrong	wrong	wrong	wrong	wrong			0.589691	0.363624	0.414988		0.346209	4	-1.25515	0.346827	0.0027198	true	true	wrong	true	wrong	wrong	wrong	wrong			0.823312	1.44211	1.73966		1.13608	4	0.307644	0.465851
P60174	TPI1	Triosephosphate isomerase OS=Homo sapiens GN=TPI1 PE=1 SV=3 - [TPIS_HUMAN]	2.79991	2.47218	1.41662		2.57524	1.24929	5	0.995887	0.540942	0.00732617	true	true	wrong	wrong	wrong	wrong	wrong	wrong		0.623437	0.626348	1.19303		0.636633	1.22841	5	-0.291339	0.51798	0.138462	true	true	wrong	wrong	wrong	wrong	wrong	wrong		1.99864	2.7386	0.662724	0.79611	2.58645	0.48397	6	0.308989	1.09306
P17812	CTPS	CTP synthase 1 OS=Homo sapiens GN=CTPS PE=1 SV=2 - [PYRG1_HUMAN]	0.692307	0.663486	0.709997	0.709209	0.675889	1.10002	6	-0.423304	0.277423	0.00673289	true	true	wrong	wrong	wrong	wrong	wrong	wrong		0.631818	0.648336	0.511101	0.775134	0.595289	0.544994	6	-0.707906	0.210903	0.000216744	true	true	wrong	true	wrong	wrong	wrong	wrong		1.27442	1.27366	1.2062	1.01697	1.22937	1.48067	6	0.309622	0.174423
Q13838	DDX39B	Spliceosome RNA helicase DDX39B OS=Homo sapiens GN=DDX39B PE=1 SV=1 - [DX39B_HUMAN]	1.18637	1.31491		1.20309	1.17587	0.956766	5	0.215646	0.168906	0.0230845	true	true	wrong	wrong	wrong	wrong	wrong	wrong		1.18027	1.00501		1.04465	0.716644	1.41024	5	0.064924	0.359557	0.353522	true	true	wrong	wrong	wrong	wrong	wrong	wrong		1.20734	1.73265		1.29055	1.92109	0.565843	5	0.310639	0.692419
Q8IX18	DHX40	Probable ATP-dependent RNA helicase DHX40 OS=Homo sapiens GN=DHX40 PE=1 SV=2 - [DHX40_HUMAN]	0.727922	0.891926		0.613452			3	-0.442709	0.270317	0.0525274	true	true	wrong	wrong	wrong	wrong	wrong	wrong		0.600308	0.609985		0.552826			3	-0.768161	0.0761732	0.00163087	true	true	wrong	true	wrong	wrong	wrong	wrong		1.2289	1.48178		1.04928			3	0.311365	0.249262
Q15046	KARS	Lysine--tRNA ligase OS=Homo sapiens GN=KARS PE=1 SV=3 - [SYK_HUMAN]	0.646268	0.632557	0.843787	0.639839	0.563537	0.77159	6	-0.563551	0.213215	0.000655024	true	true	wrong	true	wrong	wrong	wrong	wrong		0.675002	0.586424	0.654769	0.653851	0.552592	0.516047	6	-0.728511	0.156323	4.51621e-05	true	true	wrong	true	wrong	wrong	wrong	wrong		1.21045	1.43501	1.24831	1.09119	1.21008	1.31405	6	0.318599	0.132333
Q6UN15	FIP1L1	Pre-mRNA 3'-end-processing factor FIP1 OS=Homo sapiens GN=FIP1L1 PE=1 SV=1 - [FIP1_HUMAN]	0.618543	0.418112	0.764703	0.59553	0.484678	0.62697	6	-0.800718	0.30675	0.000693182	true	true	wrong	true	wrong	wrong	wrong	wrong		0.603919	0.499997	0.434004	0.607533	0.523211	0.329701	6	-1.03101	0.332969	0.000316177	true	true	wrong	true	wrong	wrong	wrong	wrong		1.24031	1.01387	1.63888	1.03892	1.09641	1.60492	6	0.318942	0.310164
Q9Y2R4	DDX52	Probable ATP-dependent RNA helicase DDX52 OS=Homo sapiens GN=DDX52 PE=1 SV=3 - [DDX52_HUMAN]	0.639516						1	-0.644947	n.a.	n.a.	true	wrong	wrong	wrong	wrong	wrong	wrong	wrong		0.502156						1	-0.993793	n.a.	n.a.	true	wrong	wrong	wrong	wrong	wrong	wrong	wrong		1.24872						1	0.320456	n.a.
Q16576	RBBP7	Histone-binding protein RBBP7 OS=Homo sapiens GN=RBBP7 PE=1 SV=1 - [RBBP7_HUMAN]	1.13107	0.876584		1.33142	0.95948		4	0.0852344	0.266287	0.283801	true	true	wrong	wrong	wrong	wrong	wrong	wrong		0.781219	0.638735		0.30132	0.552888	0.452484	5	-0.946509	0.524549	0.00783548	true	true	wrong	wrong	wrong	wrong	wrong	wrong		1.10753	1.02591		2.37176	0.903753		4	0.321053	0.628359
P62891	RPL39	60S ribosomal protein L39 OS=Homo sapiens GN=RPL39 PE=2 SV=2 - [RL39_HUMAN]	0.440332		0.830869	0.313899		0.838468	4	-0.844111	0.702517	0.0478036	true	true	wrong	wrong	wrong	wrong	wrong	wrong		0.562812		0.339782	0.65287		0.26442	4	-1.23021	0.611184	0.0137717	true	true	wrong	wrong	wrong	wrong	wrong	wrong				2.15875	0.429188		2.10999	3	0.322371	1.33611
Q00839	HNRNPU	Heterogeneous nuclear ribonucleoprotein U OS=Homo sapiens GN=HNRNPU PE=1 SV=6 - [HNRPU_HUMAN]	0.766656	0.631828	0.707013		0.576824	0.578469	5	-0.625884	0.180957	0.000752649	true	true	wrong	true	wrong	wrong	wrong	wrong		0.689998	0.569487	0.543805	0.626242	0.542092	0.501254	6	-0.796904	0.165801	3.88868e-05	true	true	wrong	true	wrong	wrong	wrong	wrong		1.40381	1.29055	1.21283		1.26378	1.1013	5	0.322531	0.128141
Q9C0F1	CEP44	Centrosomal protein of 44 kDa OS=Homo sapiens GN=CEP44 PE=1 SV=2 - [CEP44_HUMAN]		0.192821	0.34238				2	-1.9605	0.585721	0.0662706	true	wrong	wrong	wrong	wrong	wrong	wrong	wrong			0.232098	0.156851				2	-2.38987	0.399756	0.0374752	true	wrong	wrong	wrong	wrong	wrong	wrong	wrong			0.880425	1.77705				2	0.322879	0.716451
Q10570	CPSF1	Cleavage and polyadenylation specificity factor subunit 1 OS=Homo sapiens GN=CPSF1 PE=1 SV=2 - [CPSF1_HUMAN]	0.428064	0.40269	0.595187	0.960255	0.488381	0.935063	6	-0.745707	0.552476	0.0106646	true	true	wrong	wrong	wrong	wrong	wrong	wrong		0.49702	0.665206	0.362833	0.712957	0.371344	0.383655	6	-1.0598	0.436924	0.000964444	true	true	wrong	true	wrong	wrong	wrong	wrong		0.977146	0.68705	1.43007	1.4262	1.45672	1.92769	6	0.323833	0.526295
O60343	TBC1D4	TBC1 domain family member 4 OS=Homo sapiens GN=TBC1D4 PE=1 SV=2 - [TBCD4_HUMAN]		0.0189157	0.0259001	0.0252615	0.018007		4	-5.52435	0.2738	1.67437e-05	true	true	wrong	true	wrong	wrong	wrong	wrong			0.0268514	0.033001	0.0303651	0.0102168		4	-5.44864	0.785746	0.000405755	true	true	wrong	true	wrong	wrong	wrong	wrong			1.05446	0.776996	1.15949	2.59133		4	0.324918	0.741325
Q3MHD2	LSM12	Protein LSM12 homolog OS=Homo sapiens GN=LSM12 PE=1 SV=2 - [LSM12_HUMAN]	0.468226	0.376002		0.400327	0.929786	0.911846	5	-0.812965	0.643902	0.0238372	true	true	wrong	wrong	wrong	wrong	wrong	wrong		0.361098	0.285242		0.204641	0.301815	0.450851	5	-1.68913	0.422901	0.000434542	true	true	wrong	true	wrong	wrong	wrong	wrong		1.02585	1.04407		1.0915	2.38211	1.11352	5	0.326542	0.519664
Q13263	TRIM28	Transcription intermediary factor 1-beta OS=Homo sapiens GN=TRIM28 PE=1 SV=5 - [TIF1B_HUMAN]	0.566357	0.553104	0.672824		0.542643	0.519575	5	-0.814563	0.143219	0.000110101	true	true	wrong	true	wrong	wrong	true	wrong		0.627376	0.485474	0.557203		0.480374	0.524644	5	-0.909443	0.158569	0.000106549	true	true	wrong	true	wrong	wrong	true	wrong		1.26335	1.45834	1.1515		1.34342	1.08837	5	0.326635	0.169059
Q9NS69	TOMM22	Mitochondrial import receptor subunit TOM22 homolog OS=Homo sapiens GN=TOMM22 PE=1 SV=3 - [TOM22_HUMAN]	0.59841						1	-0.740793	n.a.	n.a.	true	wrong	wrong	wrong	wrong	wrong	wrong	wrong		0.467475						1	-1.09704	n.a.	n.a.	true	wrong	wrong	wrong	wrong	wrong	wrong	wrong		1.25537						1	0.328109	n.a.
P00492	HPRT1	Hypoxanthine-guanine phosphoribosyltransferase OS=Homo sapiens GN=HPRT1 PE=1 SV=2 - [HPRT_HUMAN]		1.50297		0.553861			2	-0.132295	1.01839	0.442167	true	wrong	wrong	wrong	wrong	wrong	wrong	wrong			0.721767		0.624223	0.708858		3	-0.548898	0.114167	0.00705792	true	true	wrong	wrong	wrong	wrong	wrong	wrong			1.99174		0.791274			2	0.32814	0.941713
P22695	UQCRC2	Cytochrome b-c1 complex subunit 2, mitochondrial OS=Homo sapiens GN=UQCRC2 PE=1 SV=3 - [QCR2_HUMAN]	0.838291	1.05175	0.805617	0.567452	0.946874	0.756737	6	-0.298639	0.306036	0.0311828	true	true	wrong	wrong	wrong	wrong	wrong	wrong		0.803986	0.869267	0.642867	0.846806	0.774817	0.558775	6	-0.433654	0.251372	0.00414107	true	true	wrong	true	wrong	wrong	wrong	wrong		1.12533	1.45242	1.13764	1.0233	1.75171	1.17838	6	0.328944	0.288314
Q8NBT2	SPC24	Kinetochore protein Spc24 OS=Homo sapiens GN=SPC24 PE=1 SV=1 - [SPC24_HUMAN]					0.846887	1.04615	2	-0.0873327	0.215564	0.334386	true	wrong	wrong	wrong	wrong	wrong	wrong	wrong						0.894839	0.796205	2	-0.244544	0.119139	0.105603	true	wrong	wrong	wrong	wrong	wrong	wrong	wrong						1.26173	1.25078	2	0.329115	0.00889791
P83881	RPL36A	60S ribosomal protein L36a OS=Homo sapiens GN=RPL36A PE=1 SV=2 - [RL36A_HUMAN]		0.893386		0.57728	0.995746	1.27544	4	-0.152613	0.477784	0.28418	true	true	wrong	wrong	wrong	wrong	wrong	wrong		0.337781	0.665987		0.675999	0.965017	0.290496	5	-0.910393	0.733824	0.0250601	true	true	wrong	wrong	wrong	wrong	wrong	wrong			1.17916		0.756101	1.01602	2.75368	4	0.329678	0.800121
Q92841	DDX17	Probable ATP-dependent RNA helicase DDX17 OS=Homo sapiens GN=DDX17 PE=1 SV=2 - [DDX17_HUMAN]	0.928118	0.982166	0.900989	0.824505	0.961457	0.818467	6	-0.151351	0.11107	0.0103008	true	true	wrong	wrong	wrong	wrong	wrong	wrong		0.653671	0.672791	0.678585	0.630664	0.686935	0.564444	6	-0.629407	0.105574	1.35972e-05	true	true	wrong	true	wrong	wrong	wrong	wrong		1.5031	1.48659	0.982462	1.26009	1.36261	1.04649	6	0.329981	0.258838
Q9BQG0	MYBBP1A	Myb-binding protein 1A OS=Homo sapiens GN=MYBBP1A PE=1 SV=2 - [MBB1A_HUMAN]	0.612294		0.593682	0.672683	0.365657	0.598518	5	-0.844782	0.346649	0.00275453	true	true	wrong	true	wrong	wrong	wrong	wrong		0.601991		0.449127	0.535646	0.638688	0.339432	5	-0.998652	0.36829	0.00186795	true	true	wrong	true	wrong	wrong	wrong	wrong		1.27795		1.29074	1.47238	0.844931	1.54248	5	0.332469	0.342659
Q92616	GCN1L1	Translational activator GCN1 OS=Homo sapiens GN=GCN1L1 PE=1 SV=6 - [GCN1L_HUMAN]	0.360505	0.330677	0.471197	0.421338		0.512064	5	-1.27331	0.261969	0.000203384	true	true	wrong	true	wrong	wrong	wrong	wrong		0.502899	0.406764	0.347477	0.529844		0.222342	5	-1.37998	0.504063	0.00180327	true	true	wrong	true	wrong	wrong	wrong	wrong		1.01454	1.06252	1.45625	0.907816		2.22471	5	0.332932	0.523977
A5YKK6	CNOT1	CCR4-NOT transcription complex subunit 1 OS=Homo sapiens GN=CNOT1 PE=1 SV=2 - [CNOT1_HUMAN]					0.467532		1	-1.09686	n.a.	n.a.	true	wrong	wrong	wrong	wrong	wrong	wrong	wrong						0.354871		1	-1.49464	n.a.	n.a.	true	wrong	wrong	wrong	wrong	wrong	wrong	wrong						1.25992		1	0.333334	n.a.
O43143	DHX15	Putative pre-mRNA-splicing factor ATP-dependent RNA helicase DHX15 OS=Homo sapiens GN=DHX15 PE=1 SV=2 - [DHX15_HUMAN]	0.787361	0.726222	0.667888	0.623505	0.554516	0.555777	6	-0.628065	0.205209	0.000333757	true	true	wrong	true	wrong	wrong	wrong	wrong		0.592596	0.621008	0.680977	0.739883	0.540448	0.788931	6	-0.610159	0.204835	0.000378483	true	true	wrong	true	wrong	wrong	wrong	wrong		1.56937	1.58381	0.955087	1.27557	1.26072	1.06919	6	0.3382	0.291652
Q9Y678	COPG1	Coatomer subunit gamma-1 OS=Homo sapiens GN=COPG1 PE=1 SV=1 - [COPG1_HUMAN]	0.421879	0.369733	0.438644	0.411119	0.442367	0.39566	6	-1.27769	0.097629	2.77423e-07	true	true	wrong	true	wrong	wrong	wrong	wrong		0.413747	0.315347	0.349019	0.349781	0.328969	0.281579	6	-1.56744	0.184724	2.38701e-06	true	true	wrong	true	wrong	wrong	wrong	wrong		1.37778	1.4831	1.11676	1.11655	1.48404	1.08013	6	0.338345	0.218009
Q9UNM6	PSMD13	26S proteasome non-ATPase regulatory subunit 13 OS=Homo sapiens GN=PSMD13 PE=1 SV=2 - [PSD13_HUMAN]	0.60656	0.448225	0.731549	0.634605	0.311774	0.758458	6	-0.844385	0.490448	0.00417514	true	true	wrong	true	true	wrong	wrong	wrong		0.553886	0.401107	0.499664	0.432185	0.387696	0.378106	6	-1.19194	0.220573	2.19877e-05	true	true	wrong	true	wrong	wrong	wrong	wrong		1.67743	1.23779	1.24453	1.37768	0.853118	1.35108	6	0.339465	0.320762
P04844	RPN2	Dolichyl-diphosphooligosaccharide--protein glycosyltransferase subunit 2 OS=Homo sapiens GN=RPN2 PE=1 SV=3 - [RPN2_HUMAN]	0.701387	0.844867		0.726907	0.810637	0.380967	5	-0.582043	0.466103	0.0245988	true	true	wrong	wrong	wrong	wrong	wrong	wrong		0.595215	0.662835		0.615403	0.513958	0.524302	5	-0.7868	0.156064	0.000176394	true	true	wrong	true	wrong	wrong	wrong	wrong		1.43247	1.49059		1.3391	1.87114	0.614602	5	0.343459	0.612044
Q9H910	HN1L	Hematological and neurological expressed 1-like protein OS=Homo sapiens GN=HN1L PE=1 SV=1 - [HN1L_HUMAN]	1.00932	1.3042	0.916572	0.911334	1.12713	0.496687	6	-0.116667	0.479198	0.288453	true	true	wrong	wrong	wrong	wrong	wrong	wrong		0.736296	0.667885	0.998156	0.75029	0.626659	0.893251	6	-0.379704	0.253787	0.0072609	true	true	wrong	wrong	wrong	wrong	wrong	wrong		1.54884	2.50353	0.809706	1.30438	2.0205	0.504385	6	0.343549	0.858771
Q08J23	NSUN2	tRNA (cytosine(34)-C(5))-methyltransferase OS=Homo sapiens GN=NSUN2 PE=1 SV=2 - [NSUN2_HUMAN]	0.777211	0.996229	0.823206	0.798459	0.980651	0.785546	6	-0.225146	0.163939	0.0100101	true	true	wrong	wrong	wrong	wrong	wrong	wrong		0.713938	0.743356	0.592486	0.655393	0.664379	0.494053	6	-0.647651	0.213233	0.000345835	true	true	wrong	true	wrong	wrong	wrong	wrong		1.18731	1.67444	1.14817	1.03516	1.45838	1.21256	6	0.343831	0.253364
P33993	MCM7	DNA replication licensing factor MCM7 OS=Homo sapiens GN=MCM7 PE=1 SV=4 - [MCM7_HUMAN]	0.907588	1.1607	0.869324	0.81803	1.13637	0.569068	6	-0.174266	0.375202	0.153407	true	true	wrong	wrong	wrong	wrong	wrong	wrong		0.900321	0.728576	0.614956	0.855876	0.721921	0.593275	6	-0.459604	0.242905	0.00282983	true	true	wrong	true	wrong	wrong	wrong	wrong		1.22961	1.82675	1.3706	1.09102	1.84758	0.679165	6	0.345907	0.537626
Q02086	SP2	Transcription factor Sp2 OS=Homo sapiens GN=SP2 PE=1 SV=3 - [SP2_HUMAN]					0.862594		1	-0.213246	n.a.	n.a.	true	wrong	wrong	wrong	wrong	wrong	wrong	wrong						0.647817		1	-0.626343	n.a.	n.a.	true	wrong	wrong	wrong	wrong	wrong	wrong	wrong						1.27289		1	0.348104	n.a.
P15311	EZR	Ezrin OS=Homo sapiens GN=EZR PE=1 SV=4 - [EZRI_HUMAN]	1.27054	1.30495	1.02536		2.60184		4	0.536273	0.583335	0.0816289	true	true	wrong	wrong	wrong	wrong	wrong	wrong		1.03861	1.0165	1.64501		1.92672		4	0.435629	0.467373	0.0795861	true	true	wrong	wrong	wrong	wrong	wrong	wrong		1.57515	1.65344	0.66653	1.13525	1.69746		5	0.348418	0.571789
P32969	RPL9	60S ribosomal protein L9 OS=Homo sapiens GN=RPL9 PE=1 SV=1 - [RL9_HUMAN]	0.643216	1.37501	1.41235	0.582062	1.28211	1.30896	6	0.0478507	0.589869	0.42516	true	true	wrong	wrong	wrong	wrong	wrong	wrong		0.700899	1.65552	0.382046	1.04299	1.18021	0.304748	6	-0.43136	0.959388	0.16046	true	true	wrong	wrong	wrong	wrong	wrong	wrong		0.879335	0.85917	2.75513	0.63655	1.09901	2.93	6	0.348845	0.931504
Q12959	DLG1	Disks large homolog 1 OS=Homo sapiens GN=DLG1 PE=1 SV=2 - [DLG1_HUMAN]	0.415949	0.264091	0.440197		0.224924	0.460726	5	-1.52814	0.474294	0.000983783	true	true	wrong	true	wrong	wrong	wrong	wrong		0.624608	0.396952	0.194151		0.415824	0.181292	5	-1.62125	0.768048	0.00458561	true	true	wrong	true	wrong	wrong	wrong	wrong		1.05575	0.853366	2.19835		0.760898	2.23903	5	0.350915	0.748648
P30050	RPL12	60S ribosomal protein L12 OS=Homo sapiens GN=RPL12 PE=1 SV=1 - [RL12_HUMAN]	0.835094	1.00051	0.945182	0.713398	0.90686	0.8818	6	-0.191722	0.169634	0.0197191	true	true	wrong	wrong	wrong	wrong	wrong	wrong		0.605763	0.693775	0.505455	0.595266	0.674454	0.442528	6	-0.787957	0.249471	0.000288225	true	true	wrong	true	wrong	wrong	wrong	wrong		1.30882	1.32606	1.37321	1.078	1.2033	1.40207	6	0.352648	0.141744
Q14244	MAP7	Ensconsin OS=Homo sapiens GN=MAP7 PE=1 SV=1 - [MAP7_HUMAN]	0.437777				0.498486	0.562435	3	-1.00878	0.180786	0.00526839	true	true	wrong	wrong	wrong	wrong	wrong	wrong		0.451344					0.348938	2	-1.33333	0.262519	0.0440328	true	wrong	wrong	wrong	wrong	wrong	wrong	wrong		1.18946					1.37522	2	0.354986	0.148042
P18124	RPL7	60S ribosomal protein L7 OS=Homo sapiens GN=RPL7 PE=1 SV=1 - [RL7_HUMAN]	0.702947	0.758198	0.914607	0.599106	0.757849	0.904044	6	-0.386886	0.229808	0.00457018	true	true	wrong	true	wrong	wrong	wrong	wrong		0.735298	0.615344	0.521834	0.355028	0.663722	0.413288	6	-0.9071	0.409344	0.00143821	true	true	wrong	true	wrong	wrong	wrong	wrong		1.15875	1.27369	1.38609	1.16218	1.22575	1.5067	6	0.355748	0.15001
Q9UFC0	LRWD1	Leucine-rich repeat and WD repeat-containing protein 1 OS=Homo sapiens GN=LRWD1 PE=1 SV=2 - [LRWD1_HUMAN]							0	n.a.	n.a.	n.a.	true	wrong	wrong	wrong	wrong	wrong	wrong	wrong								0	n.a.	n.a.	n.a.	true	wrong	wrong	wrong	wrong	wrong	wrong	wrong						1.28033		1	0.35651	n.a.
P06493	CDK1	Cyclin-dependent kinase 1 OS=Homo sapiens GN=CDK1 PE=1 SV=3 - [CDK1_HUMAN]	0.88118	1.18191	1.06491	1.33638	1.20911	1.16538	6	0.177074	0.205108	0.044048	true	true	wrong	wrong	wrong	wrong	wrong	wrong		0.807862	0.854978	0.68477	0.810534	0.952416	0.500812	6	-0.408536	0.327108	0.0140631	true	true	wrong	wrong	wrong	wrong	wrong	wrong		1.15078	1.39648	1.20467	1.5531	1.29337	1.13657	6	0.357335	0.175771
P49792	RANBP2	E3 SUMO-protein ligase RanBP2 OS=Homo sapiens GN=RANBP2 PE=1 SV=2 - [RBP2_HUMAN]	0.542362	0.352022	0.884696	0.533755	0.361892	0.778127	6	-0.883287	0.547651	0.00542159	true	true	wrong	wrong	wrong	wrong	wrong	wrong		0.570577	0.484466	0.246053	0.487185	0.475132	0.177543	6	-1.4138	0.677576	0.00186766	true	true	wrong	true	wrong	wrong	wrong	wrong		0.967849	0.798405	2.69082	0.872516	0.806423	3.03688	6	0.35859	0.9032
P62424	RPL7A	60S ribosomal protein L7a OS=Homo sapiens GN=RPL7A PE=1 SV=2 - [RL7A_HUMAN]	0.794191	0.820936	0.93384	0.801817	0.749515	1.0394	6	-0.232454	0.175938	0.0115215	true	true	wrong	wrong	wrong	wrong	wrong	wrong		0.651119	0.661545	0.475511	0.62316	0.661892	0.513381	6	-0.754517	0.208855	0.000153151	true	true	wrong	true	wrong	wrong	wrong	wrong		1.22107	1.21875	1.51532	1.13609	1.17968	1.47272	6	0.35902	0.175087
P35268	RPL22	60S ribosomal protein L22 OS=Homo sapiens GN=RPL22 PE=1 SV=2 - [RL22_HUMAN]	0.783186	1.0517	1.02537	0.693496	1.09275	0.986057	6	-0.110675	0.265715	0.177203	true	true	wrong	wrong	wrong	wrong	wrong	wrong		0.683678	0.789932	0.438232	0.68602	0.746486	0.402614	6	-0.726178	0.41608	0.00395031	true	true	wrong	true	wrong	wrong	wrong	wrong		1.05442	1.29604	1.74164	0.899662	1.26326	1.66224	6	0.361457	0.367977
O43242	PSMD3	26S proteasome non-ATPase regulatory subunit 3 OS=Homo sapiens GN=PSMD3 PE=1 SV=2 - [PSMD3_HUMAN]	0.587908	0.5156	0.694132	0.566208	0.654636	0.621784	6	-0.727679	0.153514	4.1594e-05	true	true	wrong	true	true	wrong	wrong	wrong		0.496709	0.439306	0.497601	0.395591	0.48556	0.379664	6	-1.16343	0.172332	7.38172e-06	true	true	wrong	true	wrong	wrong	wrong	wrong		1.28861	1.3229	1.20926	1.49219	1.59663	0.924753	6	0.363874	0.275444
P36578	RPL4	60S ribosomal protein L4 OS=Homo sapiens GN=RPL4 PE=1 SV=5 - [RL4_HUMAN]	0.762424	0.786968	1.07132	0.672962	0.72232	0.917559	6	-0.300397	0.246247	0.0152563	true	true	wrong	wrong	wrong	wrong	wrong	wrong		0.596182	0.656513	0.527165	0.61639	0.597066	0.415414	6	-0.831076	0.237304	0.000177412	true	true	wrong	true	wrong	wrong	wrong	wrong		1.26183	1.22091	1.52527	1.06588	1.13914	1.59541	6	0.364409	0.231368
P52948	NUP98	Nuclear pore complex protein Nup98-Nup96 OS=Homo sapiens GN=NUP98 PE=1 SV=4 - [NUP98_HUMAN]			0.69834	0.50337	0.725767		3	-0.656909	0.290066	0.0296364	true	true	wrong	wrong	wrong	wrong	wrong	wrong				0.225823		0.606345		2	-1.43426	1.00759	0.146755	true	wrong	wrong	wrong	wrong	wrong	wrong	wrong				1.83538		0.90545		2	0.366393	0.720806
P14174	MIF	Macrophage migration inhibitory factor OS=Homo sapiens GN=MIF PE=1 SV=4 - [MIF_HUMAN]	1.22323	1.70001	0.907457	1.14671	1.533	0.62387	6	0.174886	0.52705	0.226642	true	true	wrong	wrong	wrong	wrong	wrong	wrong		0.698831	0.716478	1.24602	0.725972	0.710397	0.91467	6	-0.294108	0.332777	0.041339	true	true	wrong	wrong	wrong	wrong	wrong	wrong		1.86489	2.52701	0.593655	1.57001	2.24437	0.466443	6	0.366845	1.0344
P26639	TARS	Threonine--tRNA ligase, cytoplasmic OS=Homo sapiens GN=TARS PE=1 SV=3 - [SYTC_HUMAN]	0.865101	1.04642	0.768232	0.877139	0.907989	0.984398	6	-0.145841	0.155398	0.0349365	true	true	wrong	wrong	wrong	wrong	wrong	wrong		0.723422	0.647487	0.853191	0.827233	0.669436	0.924364	6	-0.381552	0.206566	0.00312852	true	true	wrong	true	wrong	wrong	wrong	wrong		1.62582	2.24181	0.925151	1.3958	1.56572	0.62652	6	0.367825	0.656321
Q9Y295	DRG1	Developmentally-regulated GTP-binding protein 1 OS=Homo sapiens GN=DRG1 PE=1 SV=1 - [DRG1_HUMAN]	0.886134	0.968335	0.903461	0.756759	1.14393	1.02279	6	-0.0904788	0.202622	0.161959	true	true	wrong	wrong	wrong	wrong	wrong	wrong		0.748576	0.785997	0.63896	0.628959	0.714283	0.574354	6	-0.560961	0.171975	0.00024791	true	true	wrong	true	wrong	wrong	wrong	wrong		1.30268	1.45738	1.10932	1.15651	1.69588	1.12061	6	0.368437	0.245112
P07814	EPRS	Bifunctional glutamate/proline--tRNA ligase OS=Homo sapiens GN=EPRS PE=1 SV=5 - [SYEP_HUMAN]	0.612384	0.550489	0.723682	0.481964	0.44211	0.835103	6	-0.754296	0.34903	0.00160437	true	true	wrong	true	wrong	wrong	wrong	wrong		0.632892	0.598346	0.578805	0.553689	0.827877	0.311774	6	-0.83276	0.463623	0.00351168	true	true	wrong	true	wrong	wrong	wrong	wrong		1.14861	1.30335	1.25639	1.14446	0.955467	2.26067	6	0.369514	0.424778
Q13206	DDX10	Probable ATP-dependent RNA helicase DDX10 OS=Homo sapiens GN=DDX10 PE=1 SV=2 - [DDX10_HUMAN]					0.414315		1	-1.2712	n.a.	n.a.	true	wrong	wrong	wrong	wrong	wrong	wrong	wrong						0.543695		1	-0.879131	n.a.	n.a.	true	wrong	wrong	wrong	wrong	wrong	wrong	wrong						1.29339		1	0.371162	n.a.
A6NC98	CCDC88B	Coiled-coil domain-containing protein 88B OS=Homo sapiens GN=CCDC88B PE=1 SV=1 - [CC88B_HUMAN]							0	n.a.	n.a.	n.a.	true	wrong	wrong	wrong	wrong	wrong	wrong	wrong								0	n.a.	n.a.	n.a.	true	wrong	wrong	wrong	wrong	wrong	wrong	wrong					1.29384			1	0.371661	n.a.
Q7L014	DDX46	Probable ATP-dependent RNA helicase DDX46 OS=Homo sapiens GN=DDX46 PE=1 SV=2 - [DDX46_HUMAN]					0.242281		1	-2.04525	n.a.	n.a.	true	wrong	wrong	wrong	wrong	wrong	wrong	wrong						0.208585		1	-2.26129	n.a.	n.a.	true	wrong	wrong	wrong	wrong	wrong	wrong	wrong						1.29527		1	0.373249	n.a.
P49588	AARS	Alanine--tRNA ligase, cytoplasmic OS=Homo sapiens GN=AARS PE=1 SV=2 - [SYAC_HUMAN]	1.04809	0.897473	0.663028		0.605939	0.297876	5	-0.630224	0.701722	0.0575149	true	true	wrong	wrong	wrong	wrong	wrong	wrong		0.667454	0.620386	1.00043		0.402362	0.950946	5	-0.531479	0.53212	0.044638	true	true	wrong	wrong	wrong	wrong	wrong	wrong		2.06666	2.38401	0.853561		2.41952	0.361621	5	0.375905	1.20331
Q9H223	EHD4	EH domain-containing protein 4 OS=Homo sapiens GN=EHD4 PE=1 SV=1 - [EHD4_HUMAN]		1.04948					1	0.0696723	n.a.	n.a.	true	wrong	wrong	wrong	wrong	wrong	wrong	wrong			0.792413					1	-0.335676	n.a.	n.a.	true	wrong	wrong	wrong	wrong	wrong	wrong	wrong			1.2984					1	0.376733	n.a.
P37802	TAGLN2	Transgelin-2 OS=Homo sapiens GN=TAGLN2 PE=1 SV=3 - [TAGL2_HUMAN]	1.58693		1.54966	1.56604	2.57995	1.33591	5	0.746095	0.361564	0.00496221	true	true	wrong	true	wrong	wrong	wrong	wrong		0.916385		1.97606	0.991382	0.941022	1.5822	5	0.28368	0.506225	0.139219	true	true	wrong	wrong	wrong	wrong	wrong	wrong		1.97743		0.636859	1.5282	2.95356	0.654723	5	0.379184	0.982516
O00148	DDX39A	ATP-dependent RNA helicase DDX39A OS=Homo sapiens GN=DDX39A PE=1 SV=2 - [DX39A_HUMAN]	1.18354	1.37529		1.23041	1.20257	0.978489	5	0.247347	0.177375	0.017795	true	true	wrong	wrong	wrong	wrong	wrong	wrong		1.08948	1.0819		1.04465	0.716644	1.41024	5	0.063099	0.349732	0.353632	true	true	wrong	wrong	wrong	wrong	wrong	wrong		1.40068	1.68164		1.3489	2.00796	0.591428	5	0.383157	0.677616
Q9BTE7	DCUN1D5	DCN1-like protein 5 OS=Homo sapiens GN=DCUN1D5 PE=1 SV=1 - [DCNL5_HUMAN]					0.461991	0.697179	2	-0.817231	0.419785	0.1109	true	wrong	wrong	wrong	wrong	wrong	wrong	wrong						0.354871		1	-1.49464	n.a.	n.a.	true	wrong	wrong	wrong	wrong	wrong	wrong	wrong						1.30465		1	0.383662	n.a.
P22314	UBA1	Ubiquitin-like modifier-activating enzyme 1 OS=Homo sapiens GN=UBA1 PE=1 SV=3 - [UBA1_HUMAN]	1.16943	1.4968	0.967635		1.39343	0.692774	5	0.141863	0.447413	0.258731	true	true	wrong	wrong	wrong	wrong	wrong	wrong		0.910063	0.811086	1.28084		0.762469	1.10537	5	-0.0655328	0.312145	0.331598	true	true	wrong	wrong	wrong	wrong	wrong	wrong		1.67844	2.32411	0.726855		2.32102	0.57598	5	0.384478	0.951359
Q71RC2	LARP4	La-related protein 4 OS=Homo sapiens GN=LARP4 PE=1 SV=3 - [LARP4_HUMAN]	0.774307				1.18116	0.788256	3	-0.157362	0.34454	0.255905	true	true	wrong	wrong	wrong	wrong	wrong	wrong		0.676177				0.839184	0.540177	3	-0.568655	0.317797	0.0451189	true	true	wrong	wrong	wrong	wrong	wrong	wrong		1.23384				1.65041	1.09487	3	0.385579	0.304517
Q13155	AIMP2	Aminoacyl tRNA synthase complex-interacting multifunctional protein 2 OS=Homo sapiens GN=AIMP2 PE=1 SV=2 - [AIMP2_HUMAN]	0.657544	0.813388		0.530653	0.660827		4	-0.60366	0.251585	0.00860964	true	true	wrong	wrong	wrong	wrong	wrong	wrong		0.509431	0.486031		0.473713	0.460666		4	-1.05251	0.0616776	2.76511e-05	true	true	wrong	true	wrong	wrong	wrong	wrong		1.26546	1.64078		1.02275	1.37308		4	0.385979	0.282891
Q9P2E9	RRBP1	Ribosome-binding protein 1 OS=Homo sapiens GN=RRBP1 PE=1 SV=4 - [RRBP1_HUMAN]	1.07084		1.14745	0.726981	1.18374	1.22103	5	0.0737248	0.306505	0.309605	true	true	wrong	wrong	wrong	wrong	wrong	wrong		1.07483		0.809657		0.819779	0.44805	4	-0.411366	0.532454	0.110009	true	true	wrong	wrong	wrong	wrong	wrong	wrong		0.960877		1.0696		1.42707	2.00431	4	0.388913	0.475104
Q99615	DNAJC7	DnaJ homolog subfamily C member 7 OS=Homo sapiens GN=DNAJC7 PE=1 SV=2 - [DNJC7_HUMAN]				0.733207		0.364416	2	-0.952023	0.713211	0.155064	true	wrong	wrong	wrong	wrong	wrong	wrong	wrong					0.499276	1.06619	0.565776	3	-0.577109	0.586839	0.115309	true	true	wrong	wrong	wrong	wrong	wrong	wrong					2.29492		0.748628	2	0.390383	1.14277
P30613	PKLR	Pyruvate kinase isozymes R/L OS=Homo sapiens GN=PKLR PE=1 SV=2 - [KPYR_HUMAN]	1.26226			1.11202		0.898902	3	0.111808	0.247492	0.257934	true	true	wrong	wrong	wrong	wrong	wrong	wrong		0.706678			0.68277		0.830423	3	-0.439829	0.150795	0.0185098	true	true	wrong	wrong	wrong	wrong	wrong	wrong		1.84784			1.56915		0.78024	3	0.392606	0.660662
P63244	GNB2L1	Guanine nucleotide-binding protein subunit beta-2-like 1 OS=Homo sapiens GN=GNB2L1 PE=1 SV=3 - [GBLP_HUMAN]	1.51635	2.55356	1.70834	1.34165	2.51986	1.96137	6	0.909153	0.38201	0.00104969	true	true	wrong	true	wrong	wrong	true	wrong		0.850058	0.868033	1.20752	0.945178	0.884844	0.984308	6	-0.0745275	0.187399	0.187361	true	true	wrong	wrong	wrong	wrong	true	wrong		1.39919	2.48341	0.931721	0.673205	2.413	0.9732	6	0.392607	0.772663
Q96KP4	CNDP2	Cytosolic non-specific dipeptidase OS=Homo sapiens GN=CNDP2 PE=1 SV=2 - [CNDP2_HUMAN]				1.44562	2.3343	1.19435	3	0.670302	0.498065	0.0725213	true	true	wrong	wrong	wrong	wrong	wrong	wrong					0.833036	0.664128	1.9293	3	0.0313548	0.810559	0.476338	true	true	wrong	wrong	wrong	wrong	wrong	wrong					1.58811	3.36812	0.423021	3	0.392684	1.51535
Q15459	SF3A1	Splicing factor 3A subunit 1 OS=Homo sapiens GN=SF3A1 PE=1 SV=1 - [SF3A1_HUMAN]	0.813302	0.66977	0.706921		0.600749	0.597473	5	-0.571	0.184423	0.0011423	true	true	wrong	true	wrong	wrong	wrong	wrong		0.637279	0.517436	0.6382		0.449327	0.541391	5	-0.857578	0.214718	0.000434616	true	true	wrong	true	wrong	wrong	wrong	wrong		1.8394	1.82707	1.03		1.58318	0.711627	5	0.392686	0.600036
Q8WZ42	TTN	Titin OS=Homo sapiens GN=TTN PE=1 SV=4 - [TITIN_HUMAN]				6.51647		68.3017	2	4.39897	2.39692	0.117062	true	wrong	true	wrong	wrong	wrong	wrong	wrong					14.1368		168.743	2	5.61003	2.52953	0.0982438	true	wrong	true	wrong	wrong	wrong	wrong	wrong					1.62613		1.06435	2	0.395705	0.432373
P34932	HSPA4	Heat shock 70 kDa protein 4 OS=Homo sapiens GN=HSPA4 PE=1 SV=4 - [HSP74_HUMAN]	0.750833	0.769594	0.543164		0.633996	0.577162	5	-0.624443	0.223837	0.00168257	true	true	wrong	true	wrong	wrong	wrong	wrong		0.766522	0.597164	0.793194		0.595042	0.735274	5	-0.530848	0.200528	0.00203978	true	true	wrong	true	wrong	wrong	wrong	wrong		1.53451	1.87867	0.841905		1.78412	0.914281	5	0.397028	0.547037
P49321	NASP	Nuclear autoantigenic sperm protein OS=Homo sapiens GN=NASP PE=1 SV=2 - [NASP_HUMAN]	0.518534	0.272206	0.502174	0.2732	0.238769	0.523904	6	-1.44823	0.541991	0.000623384	true	true	wrong	true	wrong	wrong	wrong	wrong		0.576082	0.310135	0.222087	0.541301	0.351839	0.213191	6	-1.5463	0.613057	0.000809388	true	true	wrong	true	wrong	wrong	wrong	wrong		1.33719	1.2032	2.26733	0.672013	1.06769	1.99712	6	0.397674	0.636621
Q02878	RPL6	60S ribosomal protein L6 OS=Homo sapiens GN=RPL6 PE=1 SV=3 - [RL6_HUMAN]					0.980117		1	-0.0289739	n.a.	n.a.	true	wrong	wrong	wrong	wrong	wrong	wrong	wrong						0.708858		1	-0.496432	n.a.	n.a.	true	wrong	wrong	wrong	wrong	wrong	wrong	wrong						1.31973		1	0.400245	n.a.
Q13148	TARDBP	TAR DNA-binding protein 43 OS=Homo sapiens GN=TARDBP PE=1 SV=1 - [TADBP_HUMAN]	0.689367		0.517079	0.528837		0.674049	4	-0.744095	0.221605	0.0033696	true	true	wrong	true	wrong	wrong	wrong	wrong		1.00877		1.37805	0.532234		0.969219	4	-0.119937	0.573452	0.351934	true	true	wrong	wrong	wrong	wrong	wrong	wrong		1.59146	1.2468	0.67096	2.28296			4	0.400948	0.743258
Q00610	CLTC	Clathrin heavy chain 1 OS=Homo sapiens GN=CLTC PE=1 SV=5 - [CLH1_HUMAN]	0.96575	1.27351	1.07487	1.03381	1.17391	1.3198	6	0.180385	0.17657	0.027165	true	true	wrong	wrong	wrong	wrong	wrong	wrong		0.692993	0.754546	0.987736	0.73724	0.79369	0.585623	6	-0.416385	0.247202	0.00456068	true	true	wrong	true	wrong	wrong	wrong	wrong		1.36379	1.53586	0.806968	1.38302	1.29099	1.76195	6	0.401788	0.382917
P10809	HSPD1	60 kDa heat shock protein, mitochondrial OS=Homo sapiens GN=HSPD1 PE=1 SV=2 - [CH60_HUMAN]	1.39668	1.69167		1.18913	1.54605	1.02166	5	0.429972	0.292287	0.0151163	true	true	wrong	wrong	wrong	wrong	wrong	wrong		0.854838	0.899945		0.804167	0.853284	1.10334	5	-0.155965	0.17614	0.0594046	true	true	wrong	wrong	wrong	wrong	wrong	wrong		1.70961	1.99145		1.42511	1.71834	0.485305	5	0.403307	0.826447
P62495	ETF1	Eukaryotic peptide chain release factor subunit 1 OS=Homo sapiens GN=ETF1 PE=1 SV=3 - [ERF1_HUMAN]	1.17316	1.76079	0.580162	1.58913	1.74898	1.40765	6	0.371531	0.608012	0.0973532	true	true	wrong	wrong	wrong	wrong	wrong	wrong		0.784422	0.997641	0.628199	1.27356	1.12016	1.31401	6	-0.0196448	0.418084	0.456424	true	true	wrong	wrong	wrong	wrong	wrong	wrong		1.53087	2.03392	0.820276	1.21889	1.78764	0.972043	6	0.405918	0.510914
P07910	HNRNPC	Heterogeneous nuclear ribonucleoproteins C1/C2 OS=Homo sapiens GN=HNRNPC PE=1 SV=4 - [HNRPC_HUMAN]	0.496092	0.130394	0.178069				3	-2.14662	1.00857	0.033172	true	true	wrong	wrong	wrong	wrong	wrong	wrong		0.355865	0.188479	0.455925				3	-1.67709	0.657346	0.0237923	true	true	wrong	wrong	wrong	wrong	wrong	wrong		2.03889	1.3904	0.820853				3	0.40616	0.659037
P12236	SLC25A6	ADP/ATP translocase 3 OS=Homo sapiens GN=SLC25A6 PE=1 SV=4 - [ADT3_HUMAN]	0.549543	0.784089	0.788898	0.394547	0.564894	0.719597	6	-0.699519	0.388506	0.003477	true	true	wrong	true	wrong	wrong	wrong	wrong		0.666248	0.880291	0.397395	0.467501	0.57274	0.348885	6	-0.920226	0.495258	0.00305254	true	true	wrong	true	wrong	wrong	wrong	wrong		1.05259	1.14048	1.94506	1.03372	1.22809	1.83252	6	0.406914	0.405692
Q9BZZ5	API5	Apoptosis inhibitor 5 OS=Homo sapiens GN=API5 PE=1 SV=3 - [API5_HUMAN]	0.913452			0.904092	1.33293	1.07886	4	0.0620118	0.262498	0.334417	true	true	wrong	wrong	wrong	wrong	wrong	wrong		0.601562			0.586388	0.789758	0.806154	4	-0.538669	0.246678	0.0111002	true	true	wrong	wrong	wrong	wrong	wrong	wrong		1.48733			1.40821	1.59466	0.927055	4	0.407639	0.352341
P07355	ANXA2	Annexin A2 OS=Homo sapiens GN=ANXA2 PE=1 SV=2 - [ANXA2_HUMAN]	0.903797	1.22761	0.651992	1.62956	1.29342	1.68241	6	0.22651	0.525194	0.169559	true	true	wrong	wrong	wrong	wrong	wrong	wrong		0.685074	0.646177	0.790658	0.529659	0.207013	1.11924	6	-0.756849	0.824929	0.0372627	true	true	wrong	wrong	wrong	wrong	wrong	wrong		1.20756	1.50762	0.604672	1.86682	5.07159	0.534875	6	0.413149	1.18663
Q9Y6G9	DYNC1LI1	Cytoplasmic dynein 1 light intermediate chain 1 OS=Homo sapiens GN=DYNC1LI1 PE=1 SV=3 - [DC1L1_HUMAN]	0.458185	0.461295		0.482046	0.36014	0.574068	5	-1.11381	0.240416	0.000245063	true	true	wrong	true	wrong	wrong	wrong	wrong		0.356496	0.309415		0.350617	0.210478	0.396005	5	-1.65543	0.354672	0.000238082	true	true	wrong	true	wrong	wrong	wrong	wrong		1.60784	1.86676		1.44621	1.79042	0.540552	5	0.414149	0.741593
P09038	FGF2	Fibroblast growth factor 2 OS=Homo sapiens GN=FGF2 PE=1 SV=3 - [FGF2_HUMAN]	0.685074						1	-0.545669	n.a.	n.a.	true	wrong	wrong	wrong	wrong	wrong	wrong	wrong		0.503922						1	-0.988727	n.a.	n.a.	true	wrong	wrong	wrong	wrong	wrong	wrong	wrong		1.33302						1	0.414696	n.a.
P28340	POLD1	DNA polymerase delta catalytic subunit OS=Homo sapiens GN=POLD1 PE=1 SV=2 - [DPOD1_HUMAN]				0.284766	0.327643	0.48336	3	-1.49026	0.395453	0.0113381	true	true	wrong	wrong	wrong	wrong	wrong	wrong					0.29724	0.38547	0.172404	3	-1.88725	0.592405	0.0156549	true	true	wrong	wrong	wrong	wrong	wrong	wrong					1.00653	1.07171	2.19723	3	0.414997	0.625772
P63279	UBE2I	SUMO-conjugating enzyme UBC9 OS=Homo sapiens GN=UBE2I PE=1 SV=1 - [UBC9_HUMAN]			1.14673	0.66502	0.470909	0.699886	4	-0.498074	0.528689	0.0780241	true	true	wrong	wrong	wrong	wrong	true	wrong				0.933504	0.718303	0.454055	0.540907	4	-0.650554	0.457621	0.0327369	true	true	wrong	wrong	wrong	wrong	true	wrong			1.12019	1.41475	1.29667	1.52058	1.35551	5	0.416512	0.164757
Q9Y4G6	TLN2	Talin-2 OS=Homo sapiens GN=TLN2 PE=1 SV=4 - [TLN2_HUMAN]					2.78662		1	1.47852	n.a.	n.a.	true	wrong	true	wrong	wrong	wrong	wrong	wrong						1.99888		1	0.999194	n.a.	n.a.	true	wrong	wrong	wrong	wrong	wrong	wrong	wrong						1.3349		1	0.416733	n.a.
O75147	OBSL1	Obscurin-like protein 1 OS=Homo sapiens GN=OBSL1 PE=1 SV=4 - [OBSL1_HUMAN]	0.657551	1.13356				1.04153	3	-0.121755	0.422786	0.333689	true	true	wrong	wrong	wrong	wrong	wrong	wrong		0.578464	0.786211			0.279139	0.417953	4	-1.05906	0.640501	0.0227475	true	true	wrong	wrong	wrong	wrong	wrong	wrong		0.960089	1.2039			1.41707	1.9495	4	0.418742	0.429819
Q96MW1	CCDC43	Coiled-coil domain-containing protein 43 OS=Homo sapiens GN=CCDC43 PE=1 SV=2 - [CCD43_HUMAN]	0.915235	1.11534	1.05648	1.52348		1.81416	5	0.315127	0.405643	0.078685	true	true	wrong	wrong	wrong	wrong	wrong	wrong		0.6704	0.724161	0.688009	0.726447	0.839098	1.86981	6	-0.232216	0.567272	0.181014	true	true	wrong	wrong	wrong	wrong	wrong	wrong		1.44018	1.62317	1.24092	2.06148		0.713864	5	0.418774	0.572522
Q15084	PDIA6	Protein disulfide-isomerase A6 OS=Homo sapiens GN=PDIA6 PE=1 SV=1 - [PDIA6_HUMAN]	1.55338	2.08958		1.43156	1.97642	1.04128	5	0.651494	0.402904	0.0112212	true	true	wrong	wrong	wrong	wrong	wrong	wrong		1.11797	1.23591		0.862799	1.15604	1.35426	5	0.180048	0.243755	0.0869748	true	true	wrong	wrong	wrong	wrong	wrong	wrong		1.49168	2.05751		1.43304	1.77678	0.547201	5	0.419265	0.750198
Q14974	KPNB1	Importin subunit beta-1 OS=Homo sapiens GN=KPNB1 PE=1 SV=2 - [IMB1_HUMAN]	0.930576	0.944654	0.900988	0.723586	0.850453	0.684346	6	-0.264005	0.196911	0.0109276	true	true	wrong	wrong	wrong	wrong	wrong	wrong		0.649332	0.635667	0.682589	0.548073	0.607705	0.573911	6	-0.702459	0.117401	1.33575e-05	true	true	wrong	true	wrong	wrong	wrong	wrong		1.52649	1.56646	1.10508	1.36376	1.46131	1.08647	6	0.419399	0.232895
P63261	ACTG1	Actin, cytoplasmic 2 OS=Homo sapiens GN=ACTG1 PE=1 SV=1 - [ACTG_HUMAN]	2.83092	2.26831	1.34782	3.7751	2.1723	1.28052	6	1.08433	0.605603	0.00355788	true	true	true	true	wrong	true	wrong	wrong		0.973547	1.28706	1.34011		1.27899	1.52482	5	0.342279	0.23618	0.0158285	true	true	wrong	wrong	wrong	wrong	wrong	wrong		2.86624	1.7372	0.759468		1.63285	0.695531	5	0.420511	0.864705
Q15181	PPA1	Inorganic pyrophosphatase OS=Homo sapiens GN=PPA1 PE=1 SV=2 - [IPYR_HUMAN]	1.26644		1.0098	1.49599			3	0.311983	0.284606	0.0990107	true	true	wrong	wrong	wrong	wrong	wrong	wrong		1.93197		3.71508	1.61673		2.9048	4	1.26875	0.546462	0.00941377	true	true	true	wrong	wrong	wrong	wrong	wrong		1.69192		0.636889	2.22914			3	0.421422	0.94971
P31689	DNAJA1	DnaJ homolog subfamily A member 1 OS=Homo sapiens GN=DNAJA1 PE=1 SV=2 - [DNJA1_HUMAN]	0.876218	0.971411	0.859843	0.918627	1.08006	0.747006	6	-0.14708	0.178986	0.0501403	true	true	wrong	wrong	wrong	wrong	wrong	wrong		0.761904	0.71744	0.603645	0.835066	0.257757	0.528838	6	-0.789112	0.618955	0.0130835	true	true	wrong	wrong	wrong	wrong	wrong	wrong		1.31828	1.57918	1.19701	1.0561	2.40816	0.910888	6	0.421549	0.495278
P62917	RPL8	60S ribosomal protein L8 OS=Homo sapiens GN=RPL8 PE=1 SV=2 - [RL8_HUMAN]	0.755248	0.791582	0.887177	0.518309	0.7429	0.837377	6	-0.424633	0.273485	0.00629323	true	true	wrong	wrong	wrong	wrong	wrong	wrong		0.560683	0.683658	0.469872	0.417743	0.62374	0.394139	6	-0.959429	0.321248	0.000373934	true	true	wrong	true	wrong	wrong	wrong	wrong		1.32999	1.13657	1.39353	1.28498	1.18979	1.80569	6	0.423309	0.235789
Q9NS73	MBIP	MAP3K12-binding inhibitory protein 1 OS=Homo sapiens GN=MBIP PE=1 SV=2 - [MBIP1_HUMAN]				0.38701	0.403967	0.762351	3	-1.02291	0.547713	0.0418693	true	true	wrong	wrong	wrong	wrong	wrong	wrong					0.329272	0.377295	0.16016	3	-1.88377	0.664309	0.0195212	true	true	wrong	wrong	wrong	wrong	wrong	wrong					0.942302	0.89871	2.84874	3	0.423504	0.941832
Q6P6C2	ALKBH5	Probable alpha-ketoglutarate-dependent dioxygenase ABH5 OS=Homo sapiens GN=ALKBH5 PE=1 SV=1 - [ALKB5_HUMAN]	0.811762	1.25678	1.04517		1.00229	1.16773	5	0.0639226	0.241319	0.292752	true	true	wrong	wrong	wrong	wrong	wrong	wrong		0.831067	0.871506	0.774152		0.659355	0.747586	5	-0.37105	0.154777	0.00292202	true	true	wrong	true	wrong	wrong	wrong	wrong		1.10549	1.63209	1.17264		1.67928	1.23203	5	0.426009	0.280912
P12277	CKB	Creatine kinase B-type OS=Homo sapiens GN=CKB PE=1 SV=1 - [KCRB_HUMAN]	1.77025	2.17777	1.00224	1.21809	1.65869	0.653946	6	0.391991	0.633595	0.0950472	true	true	wrong	wrong	wrong	wrong	wrong	wrong		0.895362	0.741843	1.3668	0.712546	0.817928	1.22124	6	-0.105003	0.388428	0.26858	true	true	wrong	wrong	wrong	wrong	wrong	wrong		2.08341	3.07573	0.677967	1.60151	2.28088	0.371823	6	0.426813	1.17338
P40937	RFC5	Replication factor C subunit 5 OS=Homo sapiens GN=RFC5 PE=1 SV=1 - [RFC5_HUMAN]		0.787355			0.607224		2	-0.532307	0.265014	0.107745	true	wrong	wrong	wrong	wrong	wrong	wrong	wrong			0.536135			0.461894		2	-1.00685	0.152052	0.0338627	true	wrong	wrong	wrong	wrong	wrong	wrong	wrong			1.43898			1.25655		2	0.427259	0.138292
Q8N9T8	KRI1	Protein KRI1 homolog OS=Homo sapiens GN=KRI1 PE=1 SV=2 - [KRI1_HUMAN]	1.04595						1	0.0648147	n.a.	n.a.	true	wrong	wrong	wrong	wrong	wrong	wrong	wrong		0.762167						1	-0.391822	n.a.	n.a.	true	wrong	wrong	wrong	wrong	wrong	wrong	wrong		1.34504						1	0.427648	n.a.
P61978	HNRNPK	Heterogeneous nuclear ribonucleoprotein K OS=Homo sapiens GN=HNRNPK PE=1 SV=1 - [HNRPK_HUMAN]	1.15159	1.06173	0.806845	1.06568	0.93707	0.521496	6	-0.160141	0.421992	0.197634	true	true	wrong	wrong	wrong	wrong	wrong	wrong		0.66264	0.508036	1.01248	0.587334	0.524977	0.694549	6	-0.629347	0.363623	0.00408677	true	true	wrong	true	wrong	wrong	wrong	wrong		2.11395	2.3139	0.755136	1.93067	2.14198	0.389485	6	0.428793	1.06313
Q6ZTW0	TPGS1	Tubulin polyglutamylase complex subunit 1 OS=Homo sapiens GN=TPGS1 PE=2 SV=2 - [TPGS1_HUMAN]					0.226378	0.378376	2	-1.77265	0.524026	0.0655927	true	wrong	wrong	wrong	wrong	wrong	wrong	wrong						0.318387	0.0968358	2	-2.50973	1.21422	0.104922	true	wrong	wrong	wrong	wrong	wrong	wrong	wrong						0.681548	2.66948	2	0.431723	1.39277
Q13561	DCTN2	Dynactin subunit 2 OS=Homo sapiens GN=DCTN2 PE=1 SV=4 - [DCTN2_HUMAN]	0.683555	0.60372			0.54579	0.315307	4	-0.953918	0.492414	0.0152181	true	true	wrong	wrong	wrong	wrong	wrong	wrong		0.449482	0.415121			0.37636	0.353007	4	-1.33353	0.153703	0.000208556	true	true	wrong	true	wrong	wrong	wrong	wrong		1.73849	1.66247			1.62022	0.711793	4	0.43422	0.617889
P08758	ANXA5	Annexin A5 OS=Homo sapiens GN=ANXA5 PE=1 SV=2 - [ANXA5_HUMAN]	1.60023	2.21396		2.40889	2.17724	0.781814	5	0.772135	0.668715	0.0306028	true	true	wrong	wrong	wrong	wrong	wrong	wrong			0.764028		0.659795	0.700378	1.27241	4	-0.288611	0.432923	0.137315	true	true	wrong	wrong	wrong	wrong	wrong	wrong			2.40804			2.81909	0.363439	3	0.434293	1.64463
O43776	NARS	Asparagine--tRNA ligase, cytoplasmic OS=Homo sapiens GN=NARS PE=1 SV=1 - [SYNC_HUMAN]					0.885499		1	-0.175438	n.a.	n.a.	true	wrong	wrong	wrong	wrong	wrong	wrong	wrong						0.522433		1	-0.936683	n.a.	n.a.	true	wrong	wrong	wrong	wrong	wrong	wrong	wrong						1.35207		1	0.43517	n.a.
Q06830	PRDX1	Peroxiredoxin-1 OS=Homo sapiens GN=PRDX1 PE=1 SV=1 - [PRDX1_HUMAN]	1.13329	1.82381	0.654827	1.48039	1.72341	1.05758	6	0.311444	0.551144	0.112451	true	true	wrong	wrong	wrong	wrong	wrong	wrong		0.729077	0.736363	0.98853	0.846026	0.761643	0.992482	6	-0.259823	0.20522	0.0134081	true	true	wrong	wrong	wrong	wrong	wrong	wrong		1.59799	2.61115	0.53306	1.7516	2.63602	0.595239	6	0.435315	1.02284
Q15366	PCBP2	Poly(rC)-binding protein 2 OS=Homo sapiens GN=PCBP2 PE=1 SV=1 - [PCBP2_HUMAN]	0.932178	0.96551	0.793624	1.4003	1.44253	0.896116	6	0.0617776	0.3582	0.345122	true	true	wrong	wrong	wrong	wrong	wrong	wrong		0.613586	0.67452	0.674348	0.643313	0.614268	0.557165	6	-0.670742	0.104249	9.35255e-06	true	true	wrong	true	wrong	wrong	wrong	wrong		1.51331	1.42475	0.897666	1.39117	1.99784	1.14414	6	0.436947	0.389434
Q5T8P6	RBM26	RNA-binding protein 26 OS=Homo sapiens GN=RBM26 PE=1 SV=3 - [RBM26_HUMAN]	0.296845	0.137972	0.354642		0.145755	0.272949	5	-2.1514	0.624213	0.000762754	true	true	wrong	true	wrong	wrong	wrong	wrong		0.409218		0.229756		0.216734	0.113021	4	-2.19056	0.759227	0.00517289	true	true	wrong	wrong	wrong	wrong	wrong	wrong		0.977388		2.02213		0.898308	1.94142	4	0.44632	0.626179
P62140	PPP1CB	Serine/threonine-protein phosphatase PP1-beta catalytic subunit OS=Homo sapiens GN=PPP1CB PE=1 SV=3 - [PP1B_HUMAN]		0.234645	0.527933		0.244399	0.365347	4	-1.62459	0.550239	0.00484906	true	true	wrong	true	wrong	wrong	wrong	wrong			0.357148	0.367583		0.390978	0.247264	4	-1.57499	0.298923	0.000912614	true	true	wrong	true	wrong	wrong	wrong	wrong			0.989147	1.66106	2.01145	0.920572	1.55092	5	0.447664	0.491387
O43175	PHGDH	D-3-phosphoglycerate dehydrogenase OS=Homo sapiens GN=PHGDH PE=1 SV=4 - [SERA_HUMAN]	0.877161	0.94991		0.767275	0.902265	0.721476	5	-0.252952	0.166753	0.0137401	true	true	wrong	wrong	wrong	wrong	wrong	wrong		0.671431	0.660816		0.667755	0.686872	0.557171	5	-0.628135	0.122281	0.000163972	true	true	wrong	true	wrong	wrong	wrong	wrong		1.55715	1.69651		1.28057	1.37126	1.01942	5	0.448304	0.283013
Q9NZI8	IGF2BP1	Insulin-like growth factor 2 mRNA-binding protein 1 OS=Homo sapiens GN=IGF2BP1 PE=1 SV=2 - [IF2B1_HUMAN]	0.872223	0.830235	0.795796	0.795644	0.764088	0.72155	6	-0.330665	0.0944859	0.000178017	true	true	wrong	true	wrong	wrong	wrong	wrong		0.48466	0.527708	0.513181	0.492105	0.542708	0.412811	6	-1.01846	0.140266	5.15627e-06	true	true	wrong	true	wrong	wrong	wrong	wrong		1.80463	1.50876	1.04403	1.47734	1.3655	1.14183	6	0.451835	0.287049
P53396	ACLY	ATP-citrate synthase OS=Homo sapiens GN=ACLY PE=1 SV=3 - [ACLY_HUMAN]	1.07904	1.26475	1.11659		1.21302	0.990833	5	0.174602	0.13923	0.0243027	true	true	wrong	wrong	wrong	wrong	wrong	wrong		0.886457	0.789007	1.12171		0.818757	1.16042	5	-0.0847819	0.258816	0.252241	true	true	wrong	wrong	wrong	wrong	wrong	wrong		1.52618	2.02322	0.990187		1.86488	0.843382	5	0.453139	0.55854
Q9Y265	RUVBL1	RuvB-like 1 OS=Homo sapiens GN=RUVBL1 PE=1 SV=1 - [RUVB1_HUMAN]	0.4789	0.295818		0.414475	0.291714	0.479937	5	-1.3853	0.359165	0.000496845	true	true	wrong	true	wrong	wrong	wrong	wrong		0.525177	0.37746		0.500009	0.378052	0.169105	5	-1.46041	0.655451	0.00379278	true	true	wrong	true	wrong	wrong	wrong	wrong		1.26421	1.18212		1.00479	1.09225	2.9749	5	0.457332	0.635805
Q04726	TLE3	Transducin-like enhancer protein 3 OS=Homo sapiens GN=TLE3 PE=1 SV=2 - [TLE3_HUMAN]	0.511858				0.614639	0.588475	3	-0.811107	0.137919	0.00475022	true	true	wrong	true	wrong	wrong	wrong	wrong		0.53261				0.296784	0.483719	3	-1.23637	0.452355	0.0209201	true	true	wrong	wrong	wrong	wrong	wrong	wrong		1.11958				2.34951	0.984593	3	0.457639	0.677297
Q8IWZ3	ANKHD1	Ankyrin repeat and KH domain-containing protein 1 OS=Homo sapiens GN=ANKHD1 PE=1 SV=1 - [ANKH1_HUMAN]		0.36266	0.720091	0.445997	0.204526	0.295377	5	-1.43019	0.676995	0.00457281	true	true	wrong	true	wrong	wrong	wrong	wrong			0.321028	0.181714	0.33421	0.20477	0.0958779	5	-2.27025	0.732612	0.00113859	true	true	wrong	true	wrong	wrong	wrong	wrong			1.04567	2.81106	0.929039	0.897151	1.99562	5	0.457922	0.743067
P62826	RAN	GTP-binding nuclear protein Ran OS=Homo sapiens GN=RAN PE=1 SV=3 - [RAN_HUMAN]	0.834265	0.876324	0.878678	1.06776	0.823694	0.832614	6	-0.181331	0.140883	0.0126504	true	true	wrong	wrong	wrong	wrong	wrong	wrong		0.854882	0.880659	0.695857	1.5407	0.852635	0.672778	6	-0.18515	0.429298	0.16956	true	true	wrong	wrong	wrong	wrong	wrong	wrong		1.46072	1.51299	1.37196	1.16782	1.39643	1.36863	6	0.459769	0.128616
Q9Y6M1	IGF2BP2	Insulin-like growth factor 2 mRNA-binding protein 2 OS=Homo sapiens GN=IGF2BP2 PE=1 SV=2 - [IF2B2_HUMAN]	0.706561	0.611233	0.4778	0.893858	0.79061	0.67753	6	-0.556555	0.312688	0.0036456	true	true	wrong	true	wrong	wrong	wrong	wrong		0.49948	0.498444	0.465337	0.525246	0.520246	0.400822	6	-1.05005	0.14547	5.30816e-06	true	true	wrong	true	wrong	wrong	wrong	wrong		1.53148	1.32582	0.854084	1.9137	1.60373	1.27457	6	0.460344	0.396888
P47914	RPL29	60S ribosomal protein L29 OS=Homo sapiens GN=RPL29 PE=1 SV=2 - [RL29_HUMAN]	0.419916	0.559445	0.662535	0.462792	0.484032	0.671856	6	-0.902643	0.280717	0.000265115	true	true	wrong	true	wrong	wrong	wrong	wrong		0.372734	0.415882	0.285893	0.264698	0.428959	0.236898	6	-1.61872	0.362184	5.52871e-05	true	true	wrong	true	wrong	wrong	wrong	wrong		1.10624	1.26637	1.80654	1.31438	1.08556	1.88036	6	0.46057	0.344107
Q9UHR5	SAP30BP	SAP30-binding protein OS=Homo sapiens GN=SAP30BP PE=1 SV=1 - [S30BP_HUMAN]	0.534971	0.375365	0.789112	0.444404	0.204585	0.736853	6	-1.09294	0.7164	0.00673706	true	true	wrong	wrong	wrong	wrong	wrong	wrong		0.536917	0.337441	0.163042	0.45197	0.344708	0.152173	6	-1.74661	0.755775	0.00119572	true	true	wrong	true	wrong	wrong	wrong	wrong		0.992226	1.02993	3.40324	0.88729	0.542958	4.05393	6	0.46065	1.16056
O00213	APBB1	Amyloid beta A4 precursor protein-binding family B member 1 OS=Homo sapiens GN=APBB1 PE=1 SV=2 - [APBB1_HUMAN]		0.179234			0.191092	0.206886	3	-2.38028	0.103694	0.000315999	true	true	wrong	true	wrong	wrong	wrong	wrong			0.150978			0.135187	0.0842334	3	-3.06134	0.447204	0.0035191	true	true	wrong	true	wrong	wrong	wrong	wrong			1.15886			1.348	1.67551	3	0.46271	0.267377
Q8NC51	SERBP1	Plasminogen activator inhibitor 1 RNA-binding protein OS=Homo sapiens GN=SERBP1 PE=1 SV=2 - [PAIRB_HUMAN]	0.840077	0.832427		0.881295	0.610732	0.510257	5	-0.476081	0.346961	0.0186791	true	true	wrong	wrong	wrong	wrong	wrong	wrong		0.574327	0.432367		0.459164	0.432613	0.417796	5	-1.12012	0.185516	8.70815e-05	true	true	wrong	true	wrong	wrong	wrong	wrong		1.5154	1.83635		1.36996	1.49262	0.875802	5	0.463439	0.397289
P62750	RPL23A	60S ribosomal protein L23a OS=Homo sapiens GN=RPL23A PE=1 SV=1 - [RL23A_HUMAN]	0.656136	0.838624	0.898014	0.558043	0.823728	0.931621	6	-0.373421	0.289273	0.0125189	true	true	wrong	wrong	wrong	wrong	wrong	wrong		0.628223	0.725479	0.396175	0.535001	0.683777	0.34949	6	-0.90615	0.432938	0.00184292	true	true	wrong	true	wrong	wrong	wrong	wrong		1.11192	1.24264	1.86933	1.00797	1.35388	1.95012	6	0.463516	0.391599
Q9NWK9	ZNHIT6	Box C/D snoRNA protein 1 OS=Homo sapiens GN=ZNHIT6 PE=1 SV=1 - [BCD1_HUMAN]		1.4262		1.07128	1.29004		3	0.326311	0.209468	0.0571427	true	true	wrong	wrong	wrong	wrong	wrong	wrong			1.17745		1.09932	0.859386		3	0.0512174	0.238879	0.373008	true	true	wrong	wrong	wrong	wrong	wrong	wrong			1.44511		1.11344	1.64356		3	0.467673	0.286234
Q9NTJ3	SMC4	Structural mainten.a.ce of chromosomes protein 4 OS=Homo sapiens GN=SMC4 PE=1 SV=2 - [SMC4_HUMAN]	0.500345	0.5533	0.769666	0.48204	0.57957	0.861314	6	-0.714279	0.341348	0.00184483	true	true	wrong	true	wrong	wrong	wrong	wrong		0.498278	0.498631	0.436946	0.667215	0.603129	0.321	6	-1.026	0.371217	0.000534301	true	true	wrong	true	wrong	wrong	wrong	wrong		1.18397	1.30832	1.59053	1.00111	1.10697	2.57139	6	0.468606	0.493643
Q96IZ6	METTL2A	Methyltransferase-like protein 2A OS=Homo sapiens GN=METTL2A PE=1 SV=5 - [MET2A_HUMAN]		0.889132					1	-0.16953	n.a.	n.a.	true	wrong	wrong	wrong	wrong	wrong	wrong	wrong			0.630453					1	-0.665539	n.a.	n.a.	true	wrong	wrong	wrong	wrong	wrong	wrong	wrong			1.3843					1	0.469159	n.a.
Q9UHV9	PFDN2	Prefoldin subunit 2 OS=Homo sapiens GN=PFDN2 PE=1 SV=1 - [PFD2_HUMAN]				1.13879			1	0.187504	n.a.	n.a.	true	wrong	wrong	wrong	wrong	wrong	wrong	wrong				1.87877	1.53488			2	0.763957	0.206234	0.0600389	true	wrong	wrong	wrong	wrong	wrong	wrong	wrong					1.38751			1	0.472494	n.a.
Q8WWM7	ATXN2L	Ataxin-2-like protein OS=Homo sapiens GN=ATXN2L PE=1 SV=2 - [ATX2L_HUMAN]	0.4983					0.521677	2	-0.971843	0.0467688	0.0108275	true	wrong	wrong	wrong	wrong	wrong	wrong	wrong		0.436747					0.184782	2	-1.81562	0.877499	0.104821	true	wrong	wrong	wrong	wrong	wrong	wrong	wrong		1.09503					1.76045	2	0.473458	0.48435
P27816	MAP4	Microtubule-associated protein 4 OS=Homo sapiens GN=MAP4 PE=1 SV=3 - [MAP4_HUMAN]	0.485944	0.353365	0.543258	0.422363	0.277112	0.652086	6	-1.18899	0.443513	0.000614122	true	true	wrong	true	wrong	wrong	wrong	wrong		0.491513	0.440457	0.282135	0.436311	0.273858	0.183478	6	-1.59076	0.548887	0.000429655	true	true	wrong	true	wrong	wrong	wrong	wrong		1.03723	0.946683	1.84411	1.08634	1.18911	3.06803	6	0.473879	0.653243
P11142	HSPA8	Heat shock cognate 71 kDa protein OS=Homo sapiens GN=HSPA8 PE=1 SV=1 - [HSP7C_HUMAN]	0.404448	0.290923	0.402006	0.355037	0.273352	0.381815	6	-1.52603	0.243783	1.07031e-05	true	true	wrong	true	wrong	wrong	wrong	wrong		0.485954	0.322931	0.324805	0.48726	0.335107	0.281178	6	-1.45652	0.334847	6.30088e-05	true	true	wrong	true	wrong	wrong	wrong	wrong		1.35824	1.46198	1.54193	1.11895	1.31831	1.59146	6	0.474264	0.184773
Q8TD19	NEK9	Serine/threonine-protein kinase Nek9 OS=Homo sapiens GN=NEK9 PE=1 SV=2 - [NEK9_HUMAN]	0.383114	0.21572	0.445907		0.213858	0.424149	5	-1.64495	0.529981	0.00113181	true	true	wrong	true	wrong	wrong	wrong	wrong		0.373526	0.220658	0.1141		0.256665	0.120994	5	-2.3483	0.731381	0.000996689	true	true	wrong	true	wrong	wrong	wrong	wrong		1.07924	0.888753	2.7957		0.789882	2.44974	5	0.475084	0.851342
P07737	PFN1	Profilin-1 OS=Homo sapiens GN=PFN1 PE=1 SV=2 - [PROF1_HUMAN]				1.97379	2.60023	1.32312	3	0.921184	0.490091	0.0414	true	true	wrong	wrong	wrong	wrong	wrong	wrong					1.21006	0.938435	2.39371	3	0.480885	0.698578	0.177713	true	true	wrong	wrong	wrong	wrong	wrong	wrong					1.72936	2.91984	0.534624	3	0.477576	1.25422
P60709	ACTB	Actin, cytoplasmic 1 OS=Homo sapiens GN=ACTB PE=1 SV=1 - [ACTB_HUMAN]	2.55267	2.09038	1.28547	2.35768	1.99943	1.22629	6	0.884886	0.449333	0.0023911	true	true	wrong	true	wrong	wrong	wrong	wrong		0.985045	1.30924	1.35677	0.92485	1.33097	1.08154	6	0.203337	0.24203	0.0473437	true	true	wrong	wrong	wrong	wrong	wrong	wrong		2.54243	1.5649	0.711437	2.33001	1.43709	0.773129	6	0.478891	0.774033
[truncated: 1,111 more rows]
[truncated: 13 more columns]
